# Supplementary material for: High-yielding total synthesis of embelin, rapanone, and irisoquin A, D, F
Source: Royal Society of Chemistry journal article supplement (doi:10.1039/d4ob01706d), 2025-01-01

## Supporting Information-II

### High-yielding Total Synthesis of Embelin, Rapanone, and Irisoquin A, D, F

Etikala Ashok, Pandhiti R. Lakshmi, Shyam D. Sanwal, and Dhevalapally B. Ramachary\*

*Catalysis Laboratory, School of Chemistry, University of Hyderabad, Hyderabad-500 046, India*

*\*Correspondence: [ramsc@uohyd.ac.in](mailto:ramsc@uohyd.ac.in) and [ramchary.db@gmail.com](mailto:ramchary.db@gmail.com)*

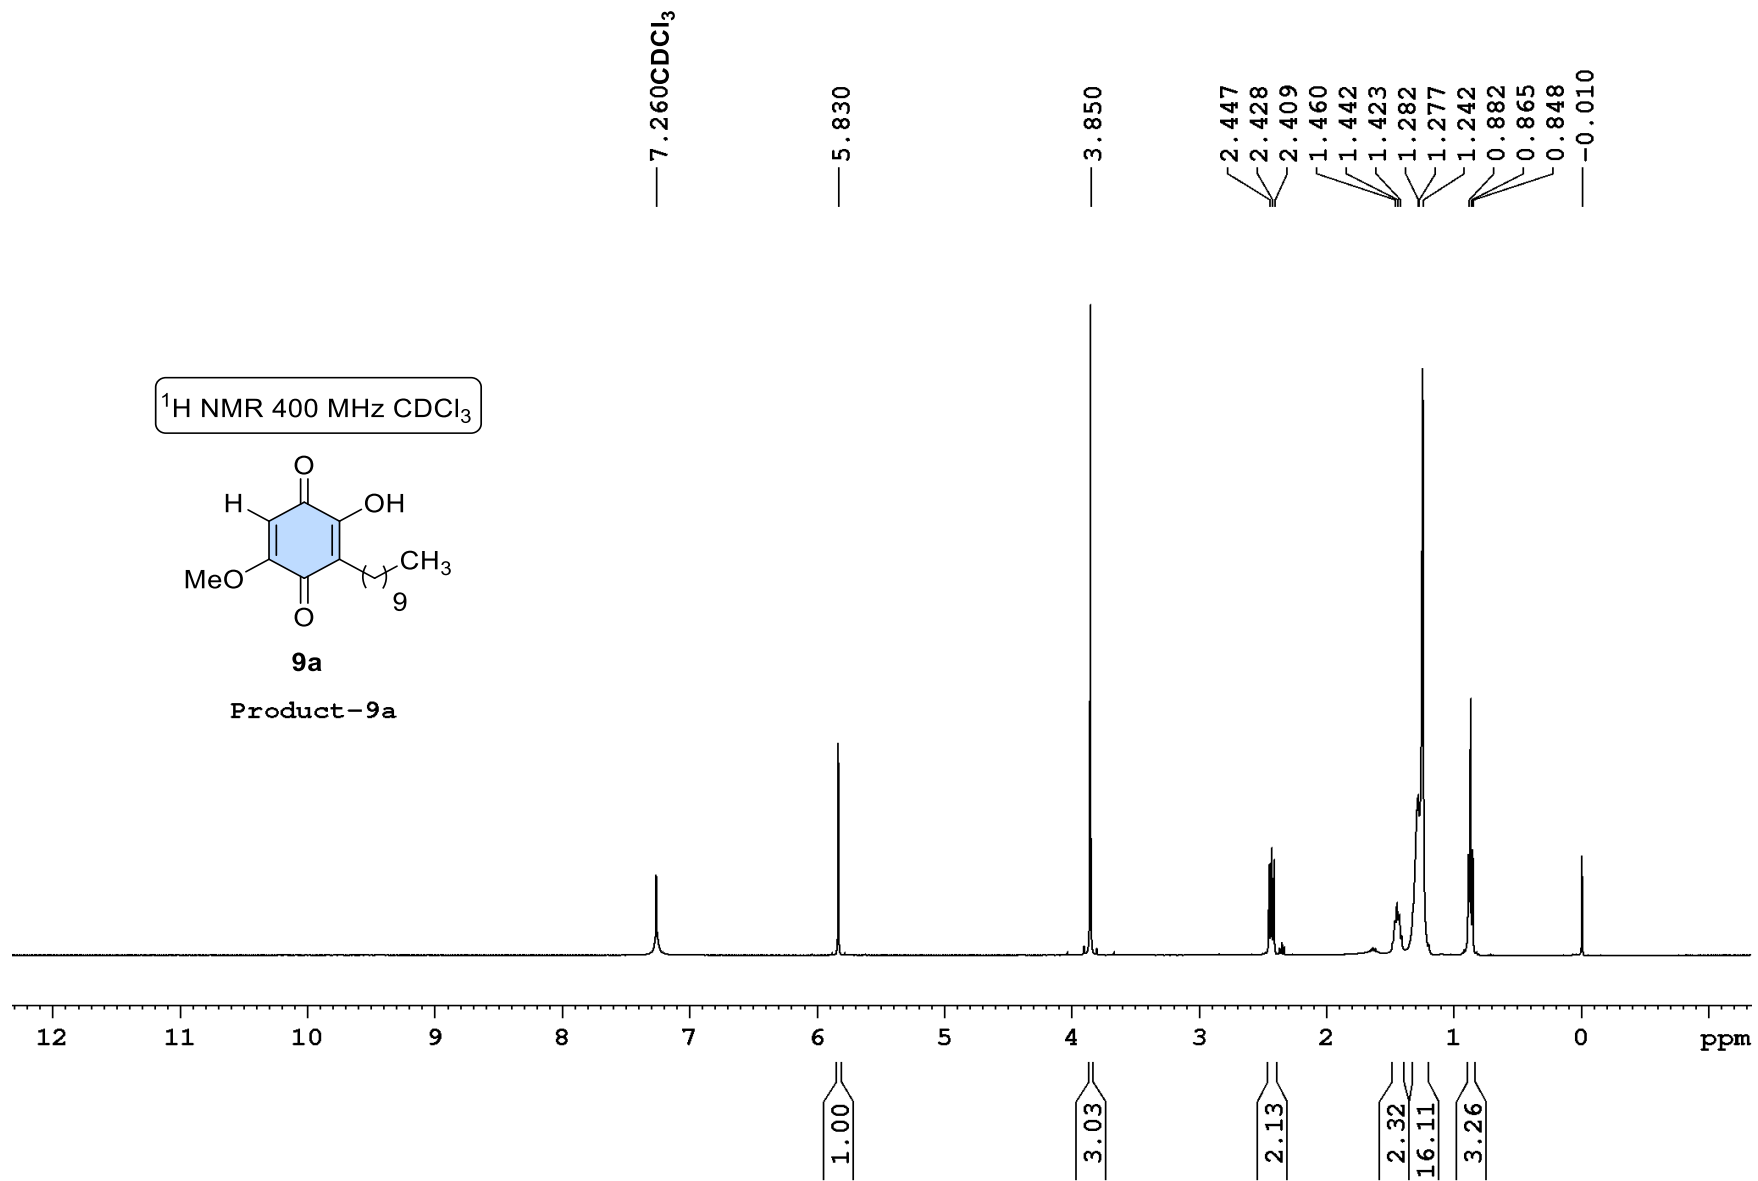

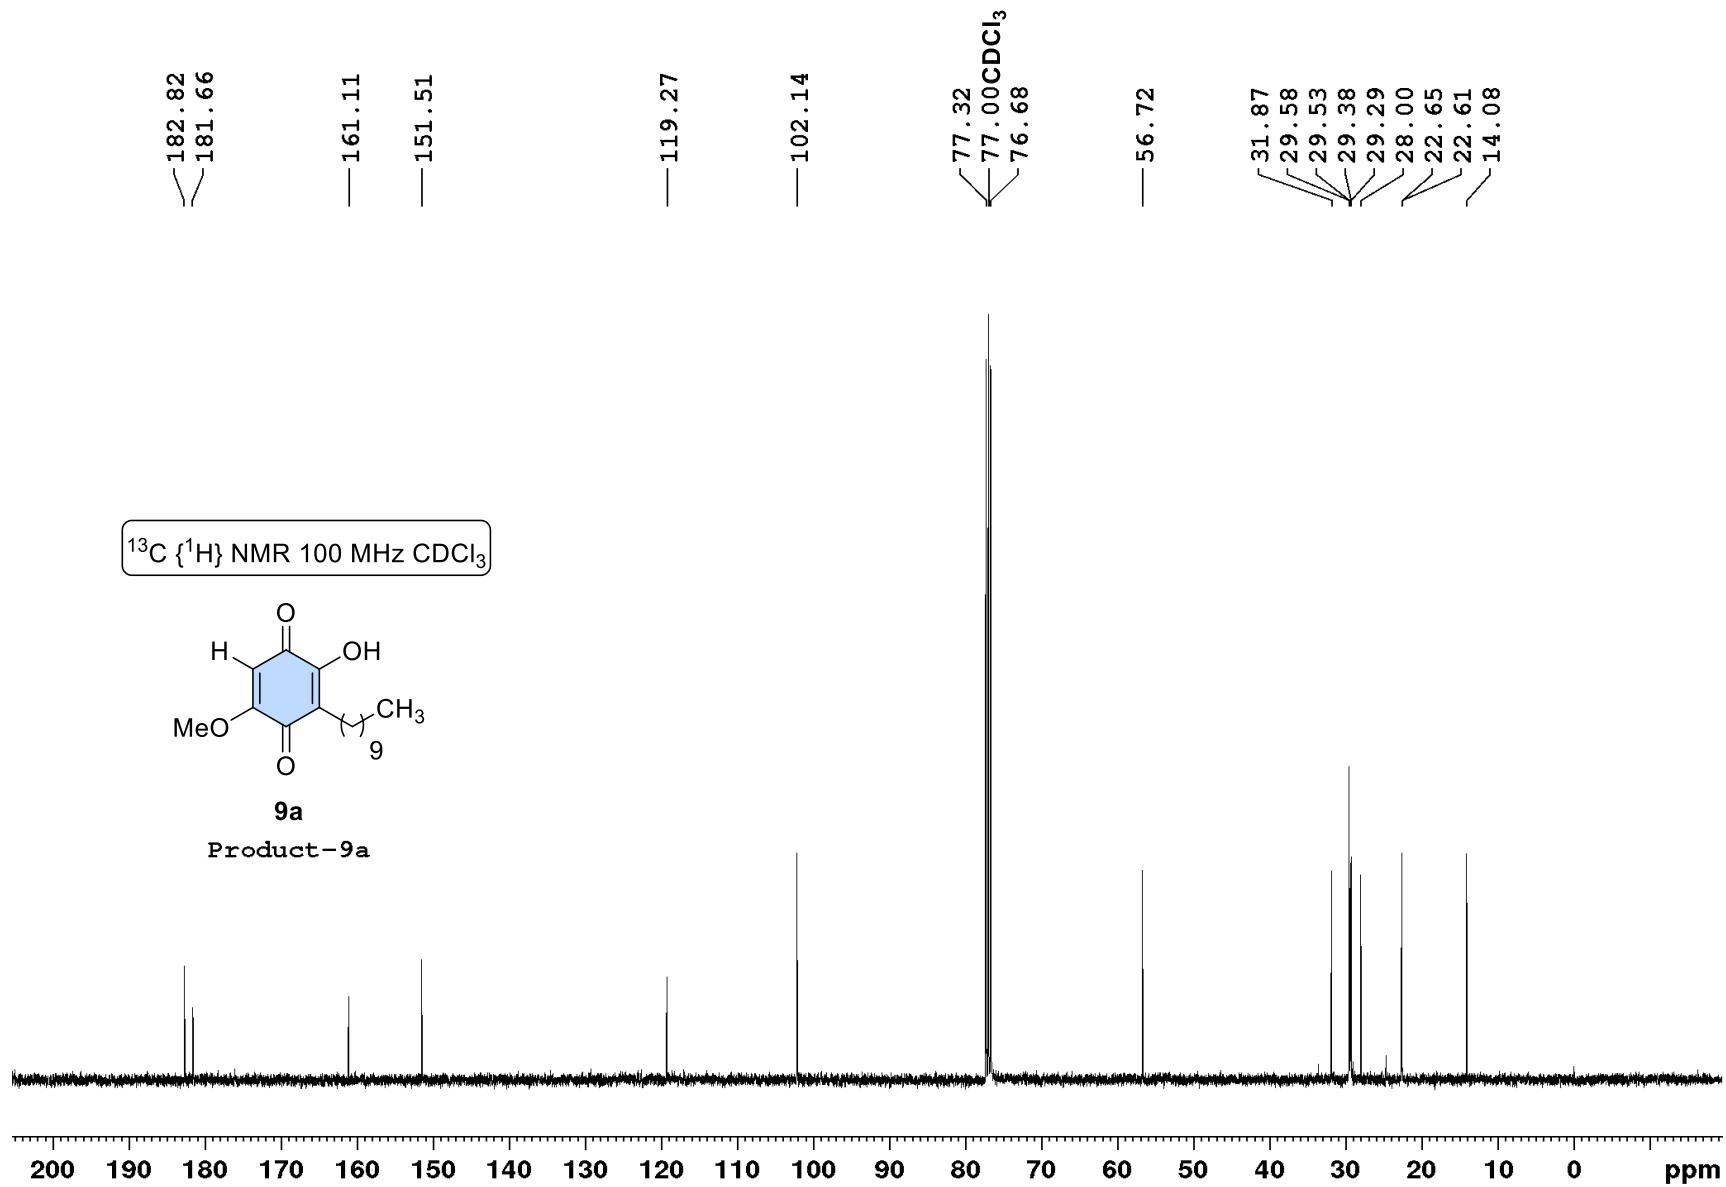

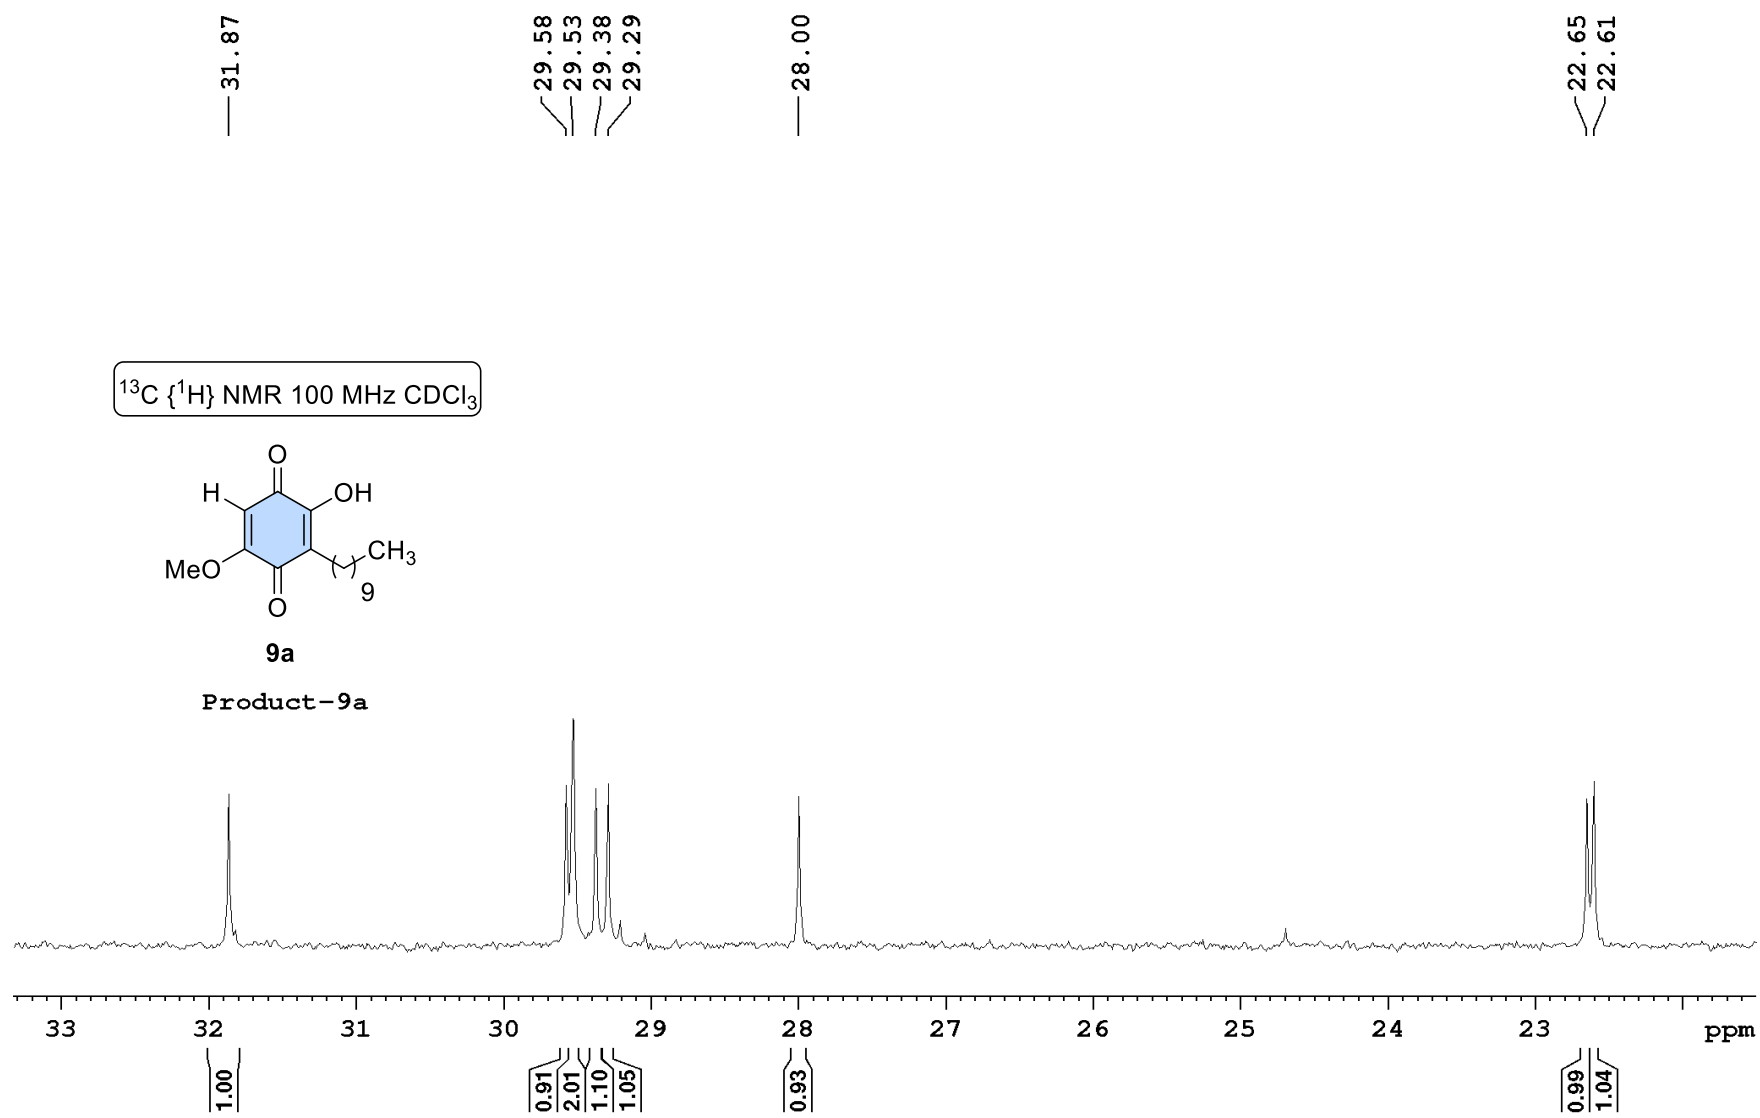

DEPT-135 100 MHz CDCl<sub>3</sub>

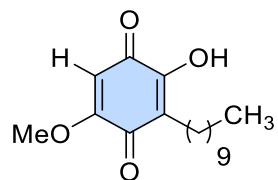

9a

Product-9a

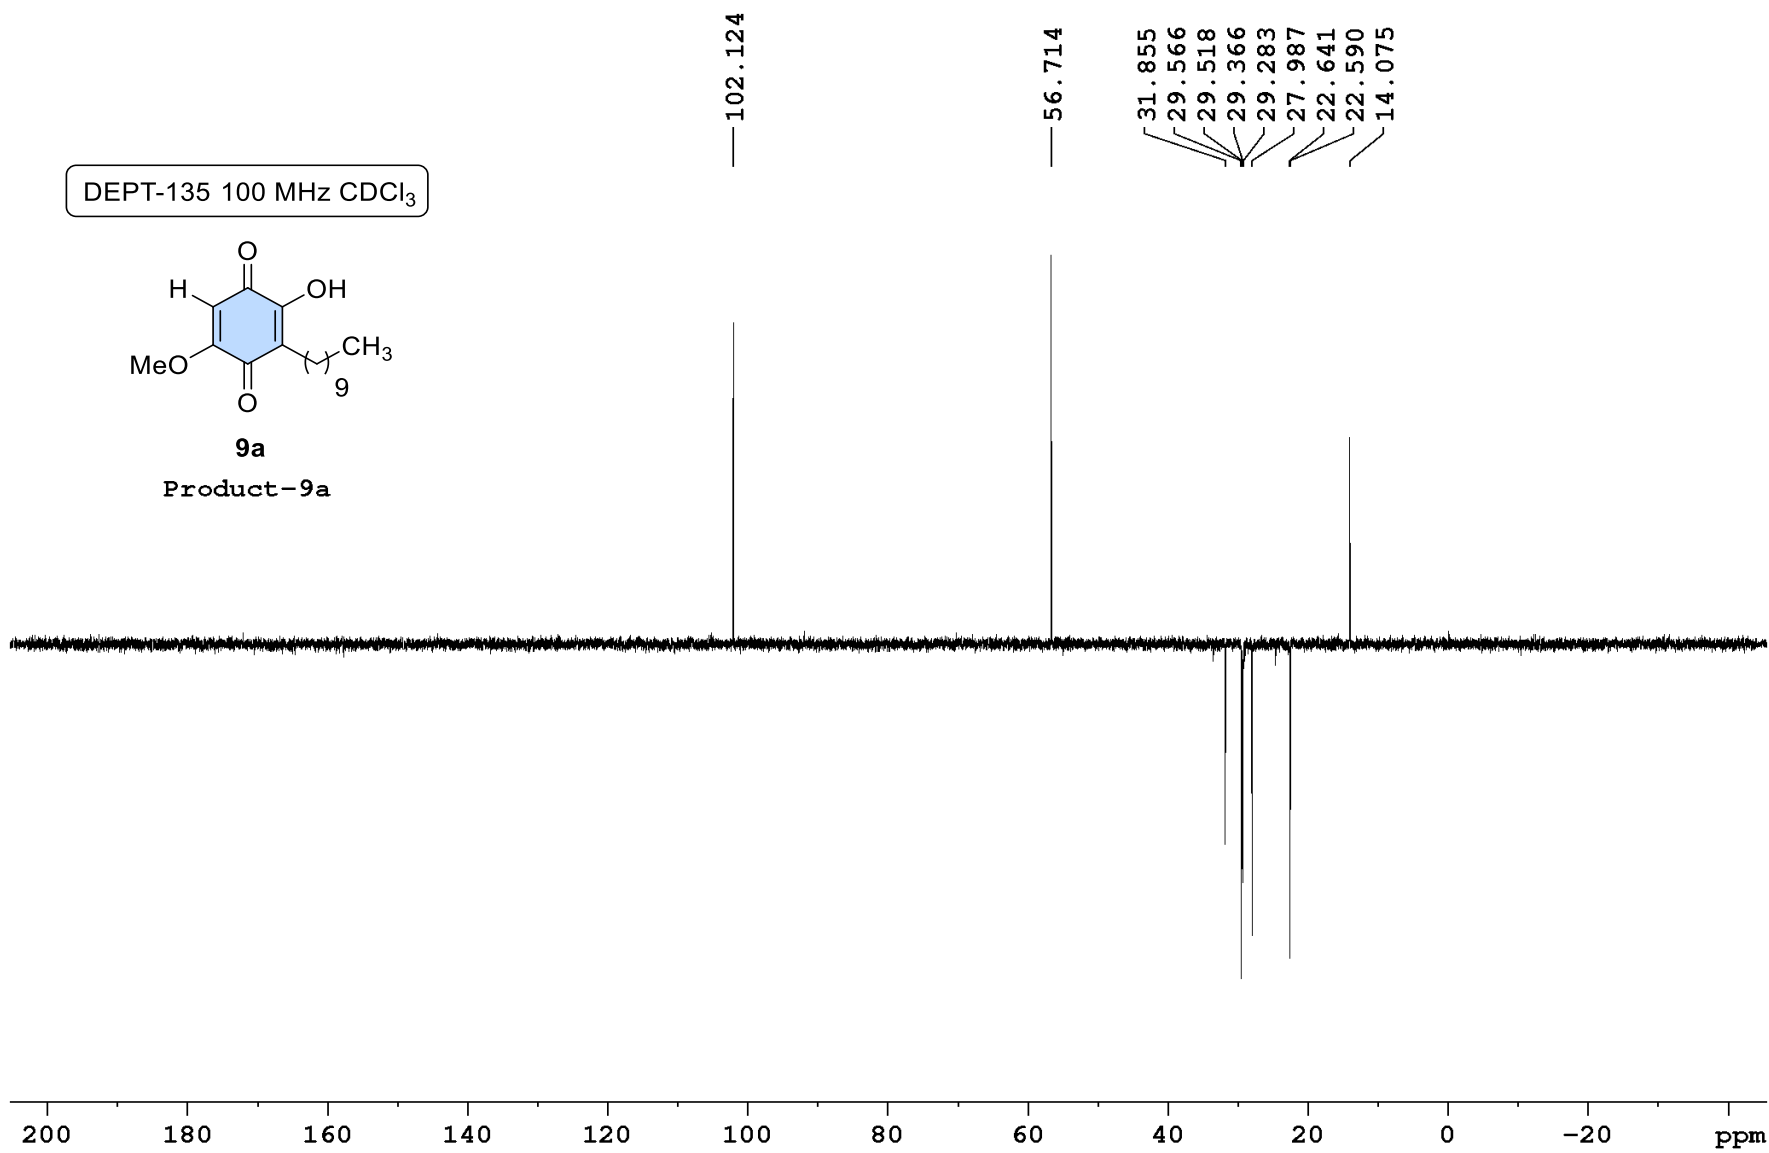

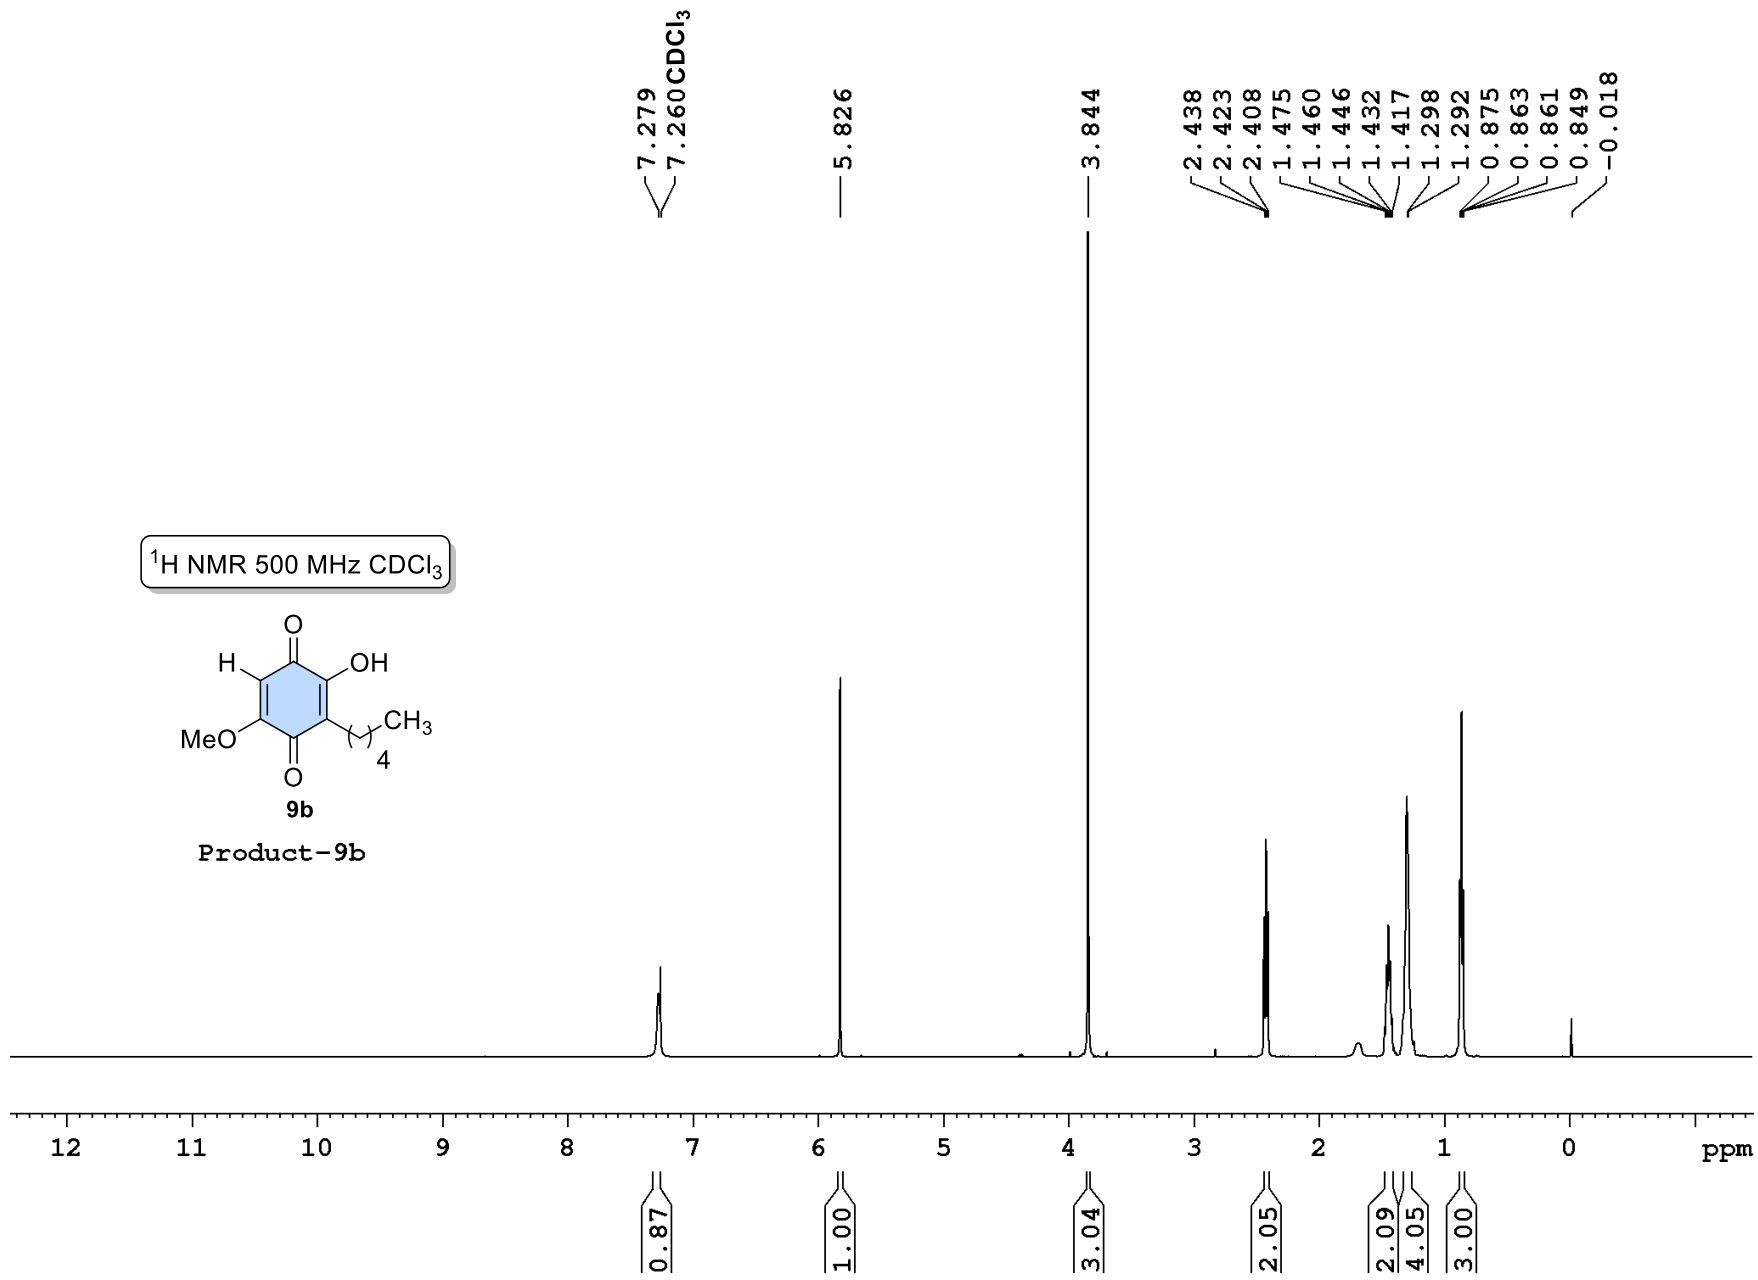

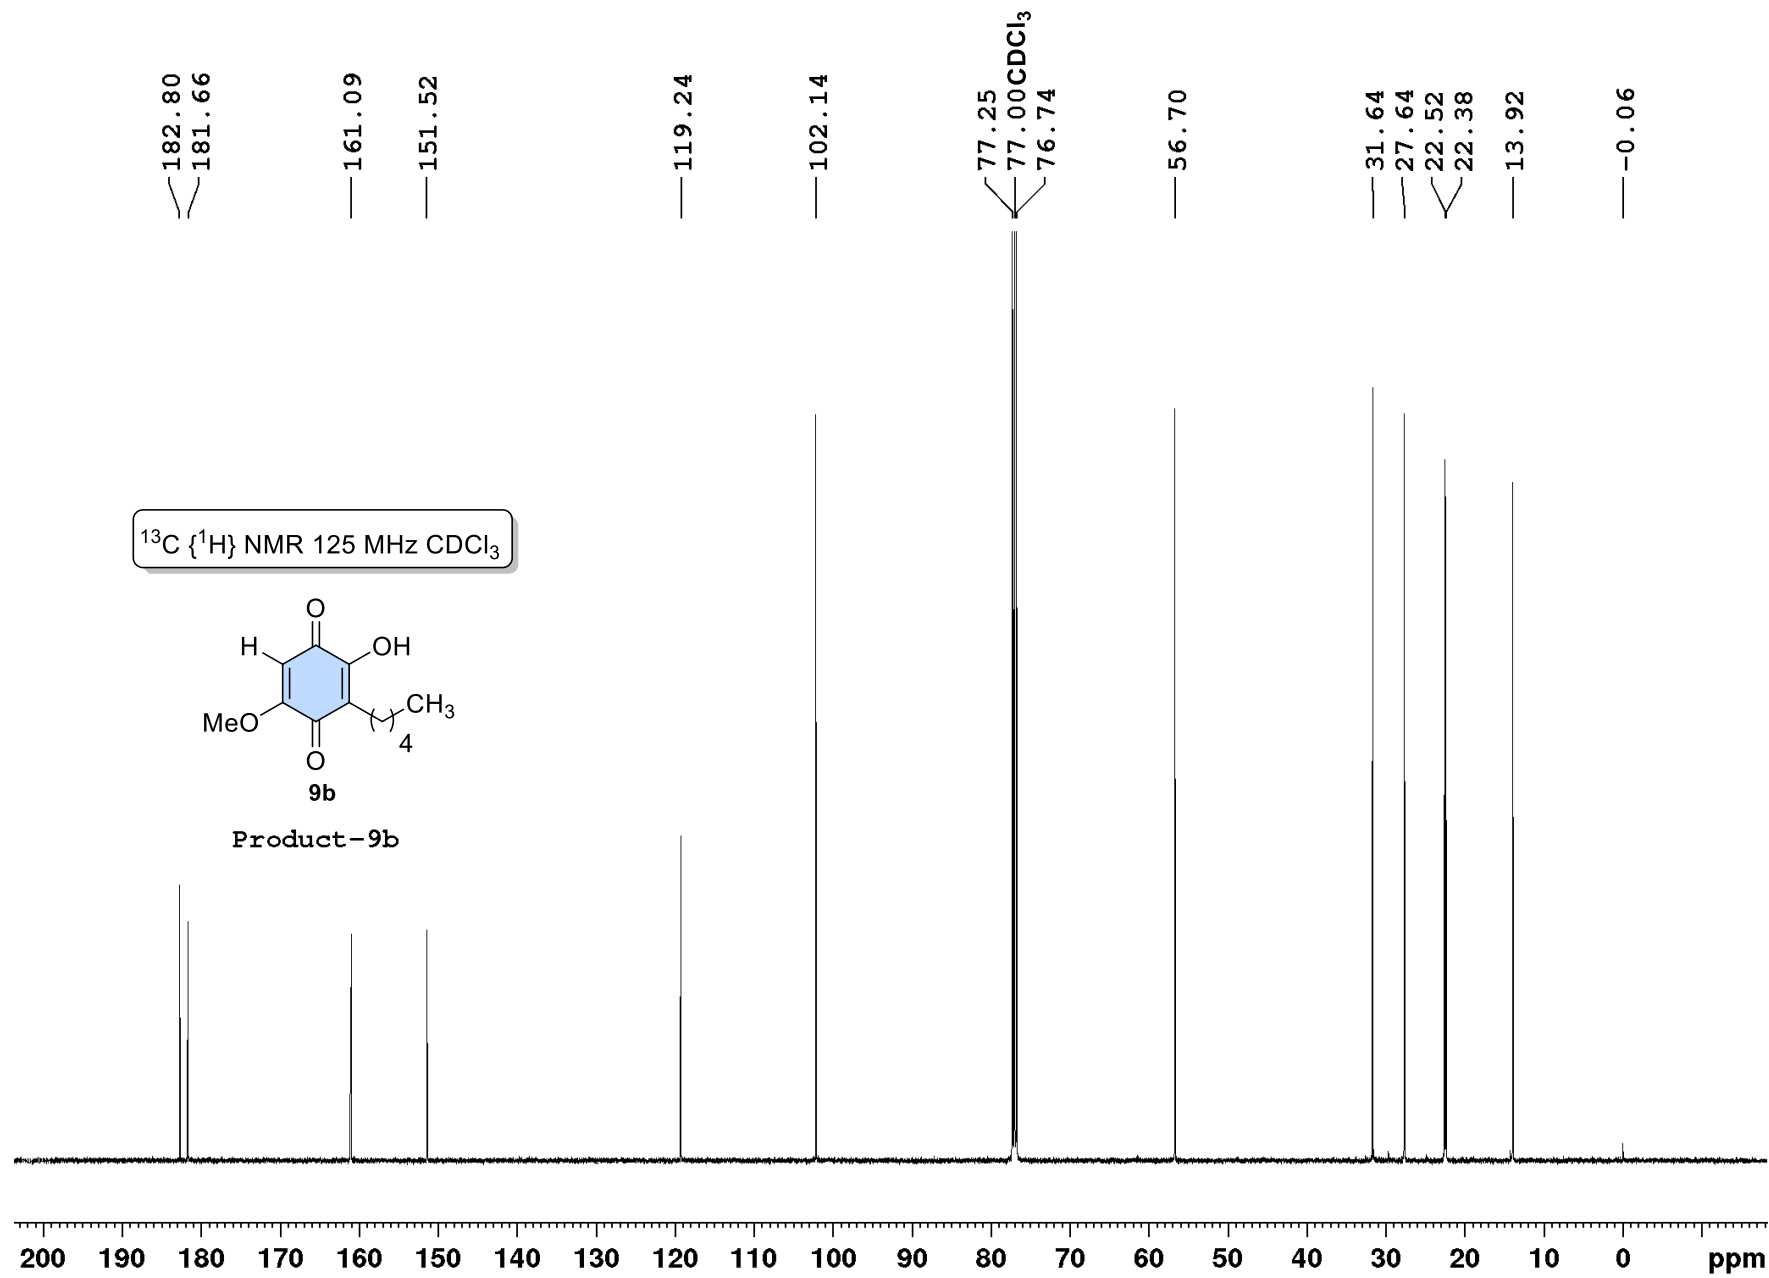

DEPT-135 125 MHz CDCl<sub>3</sub>

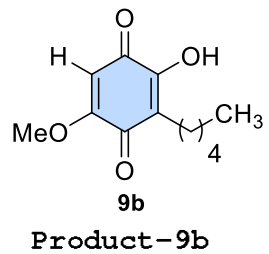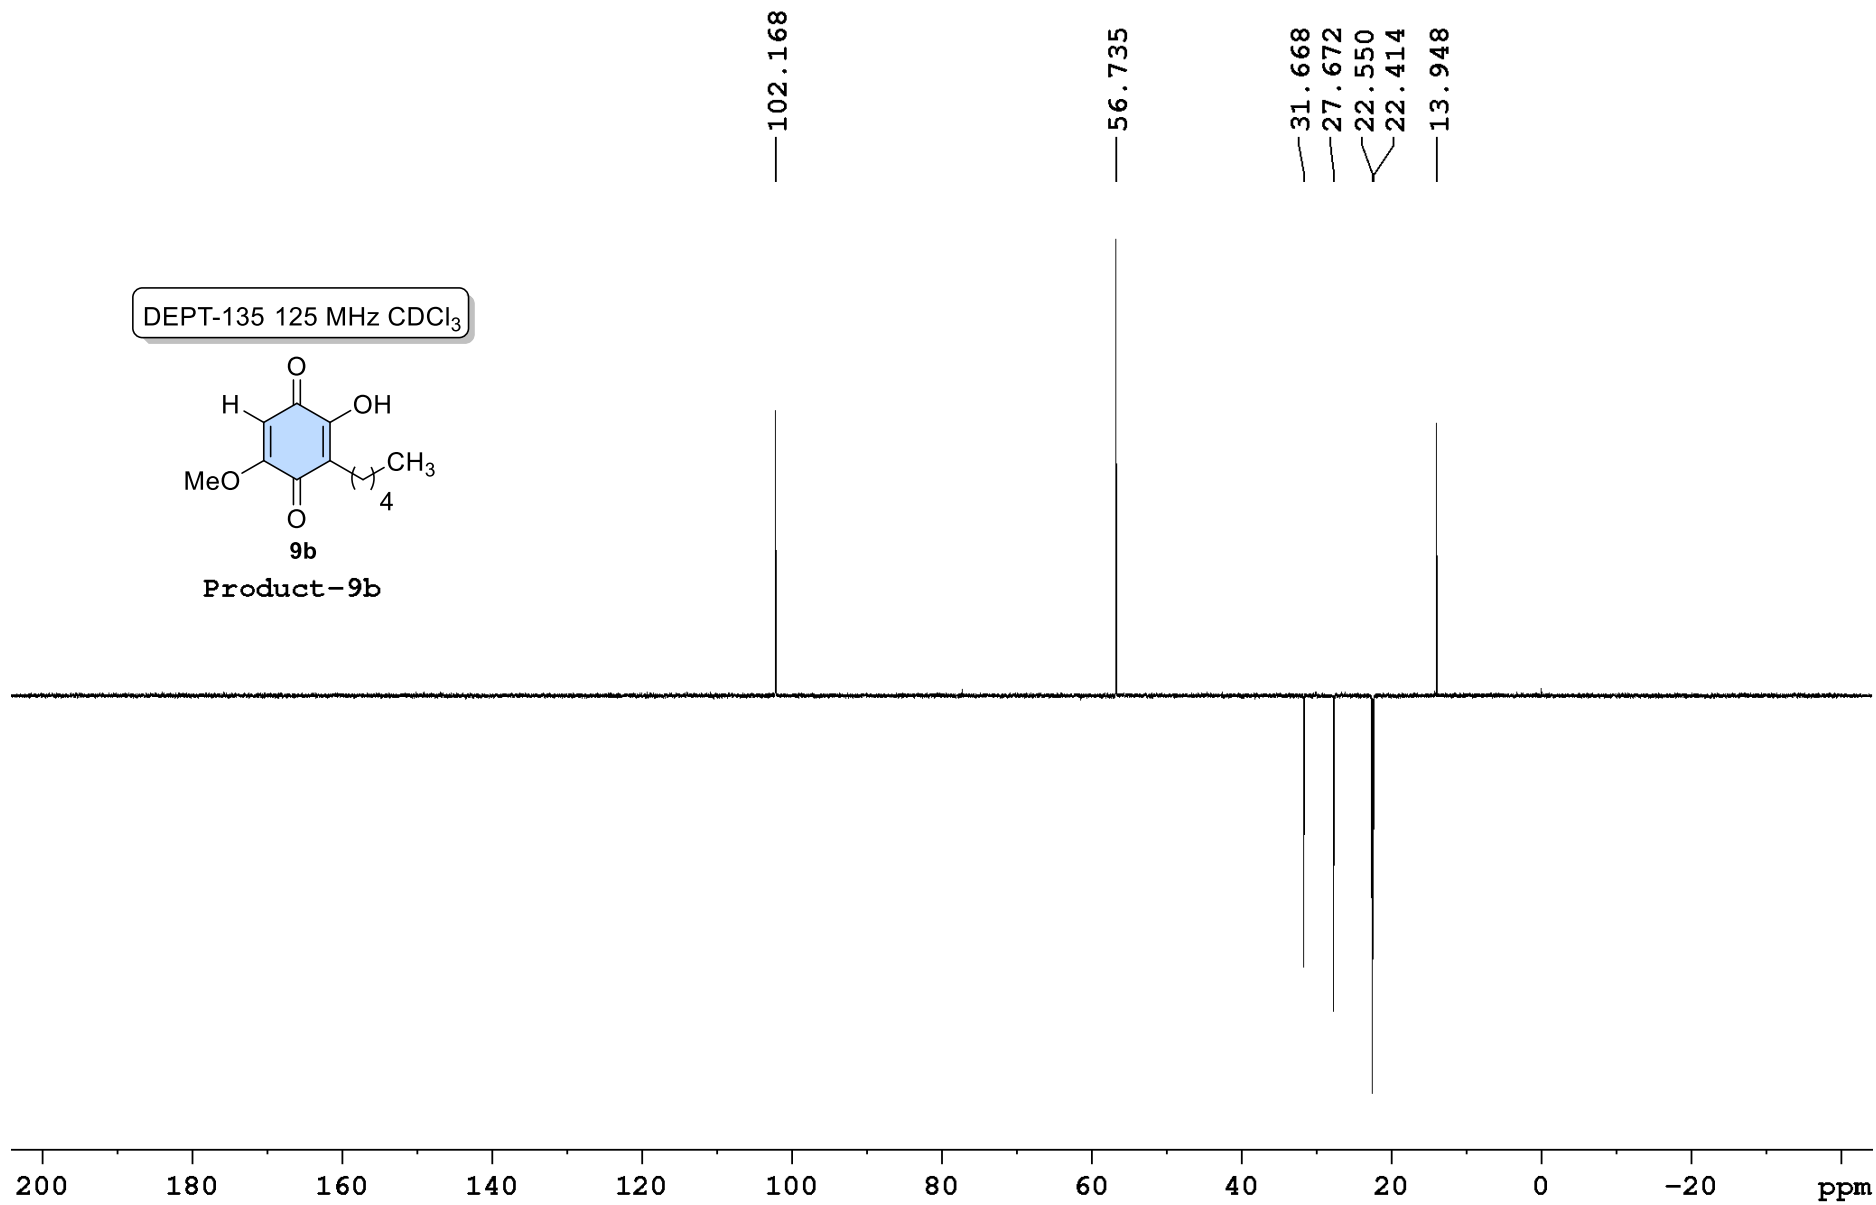



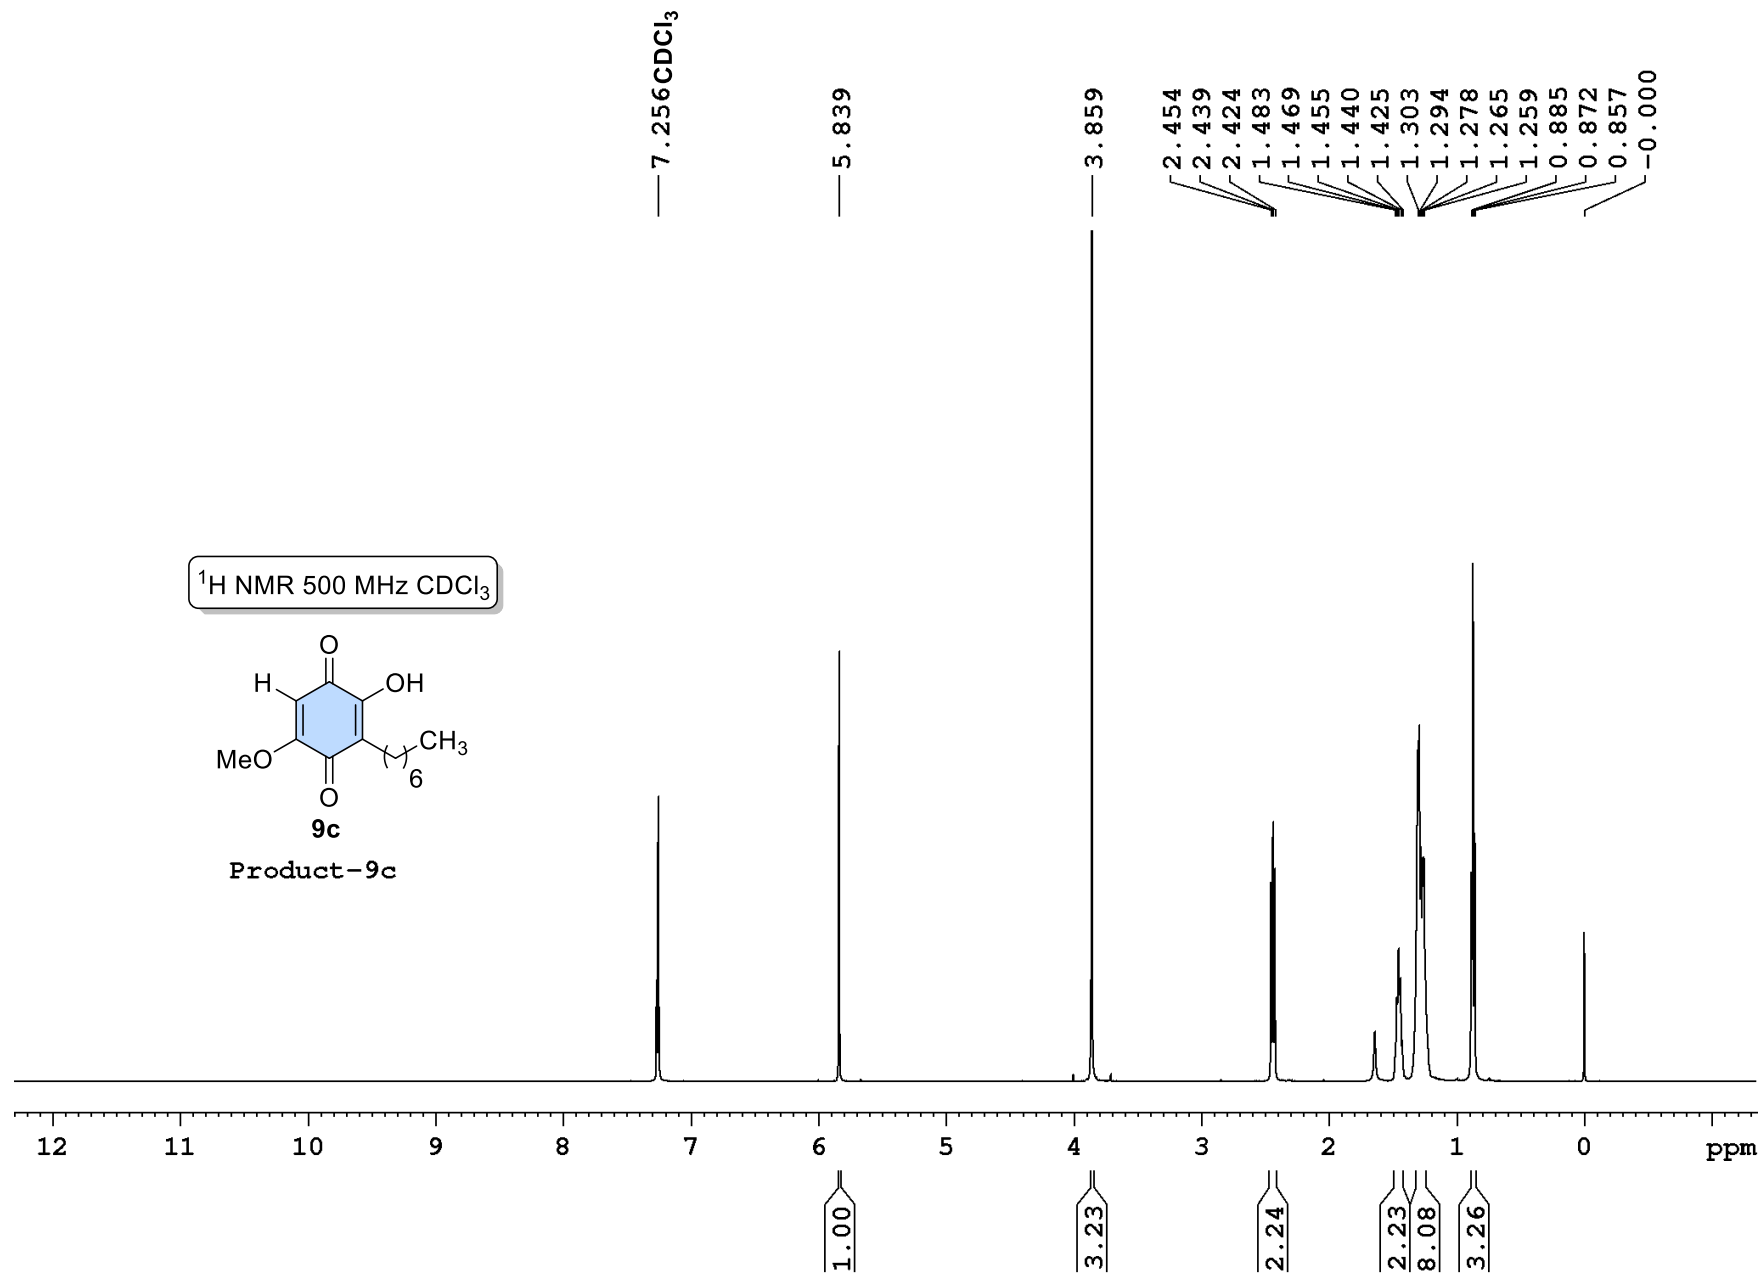

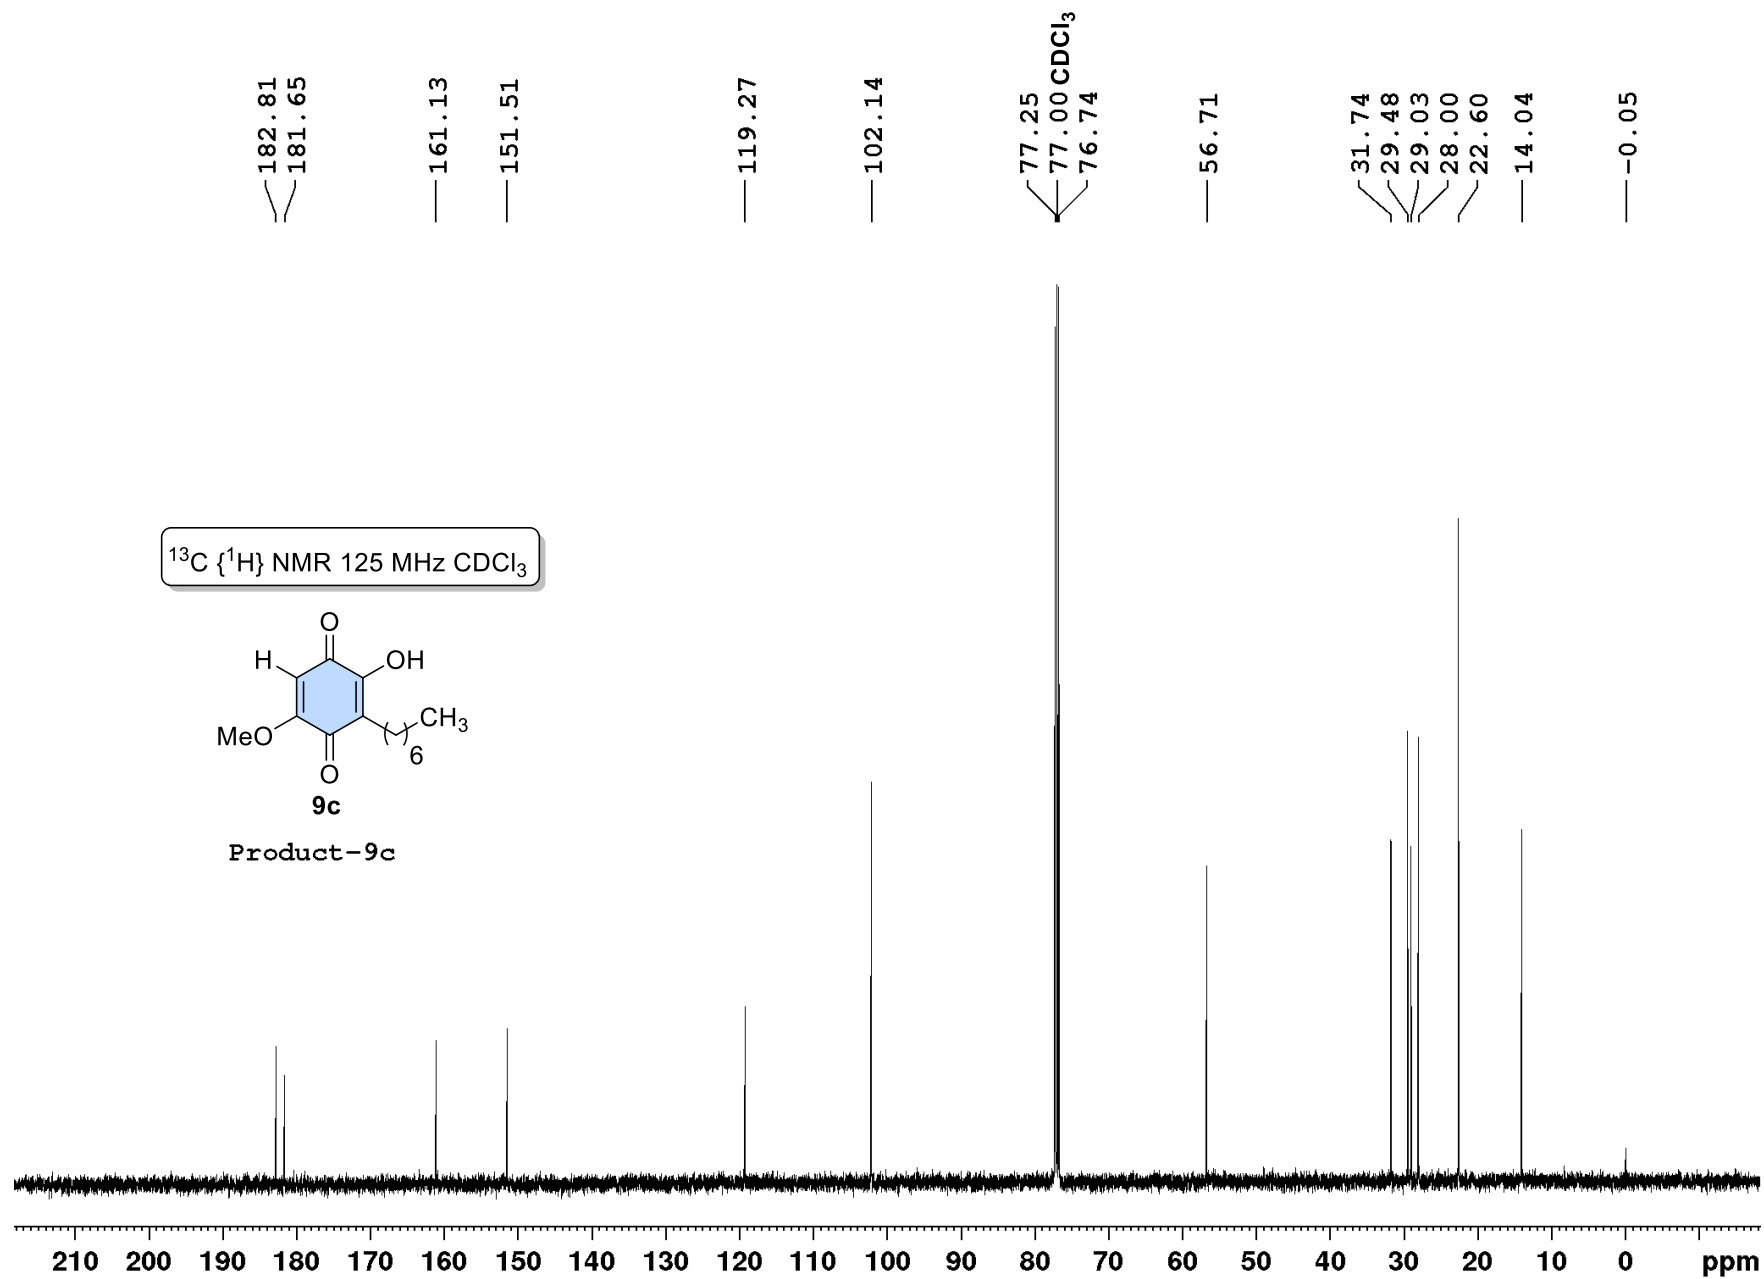

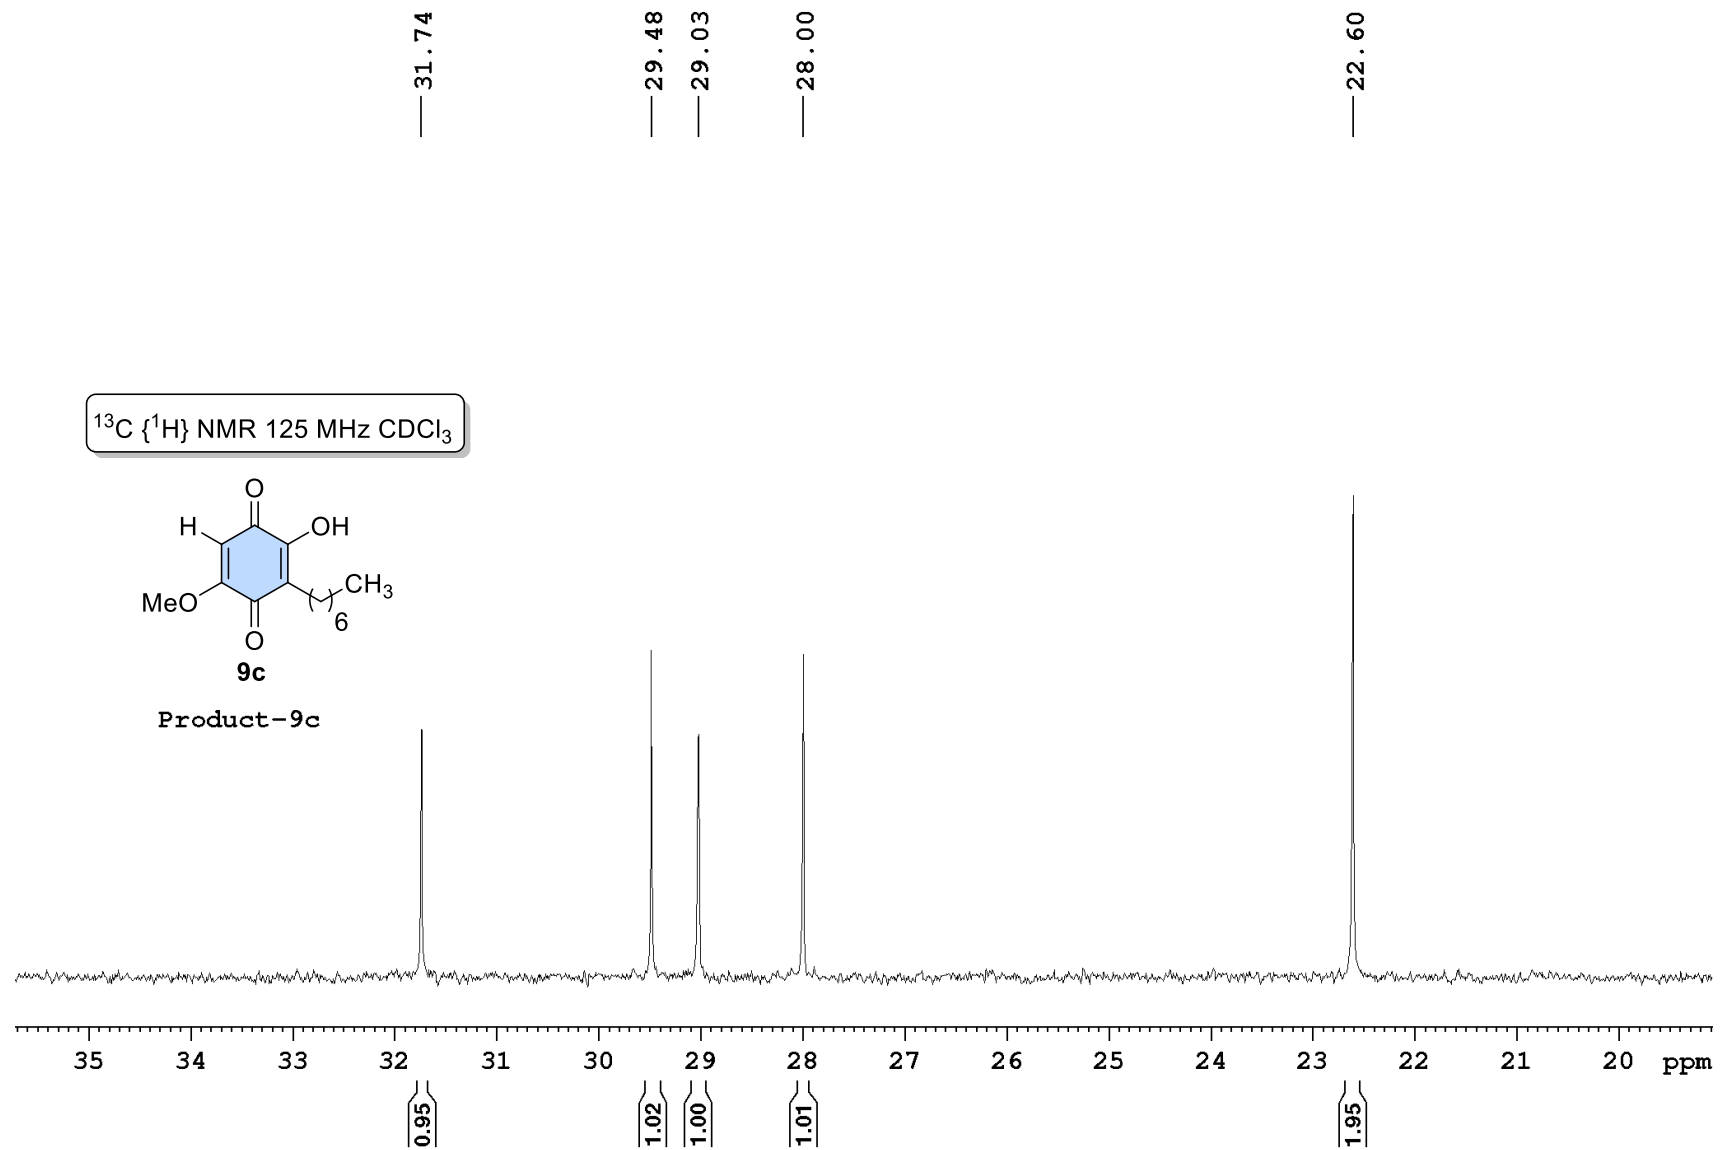

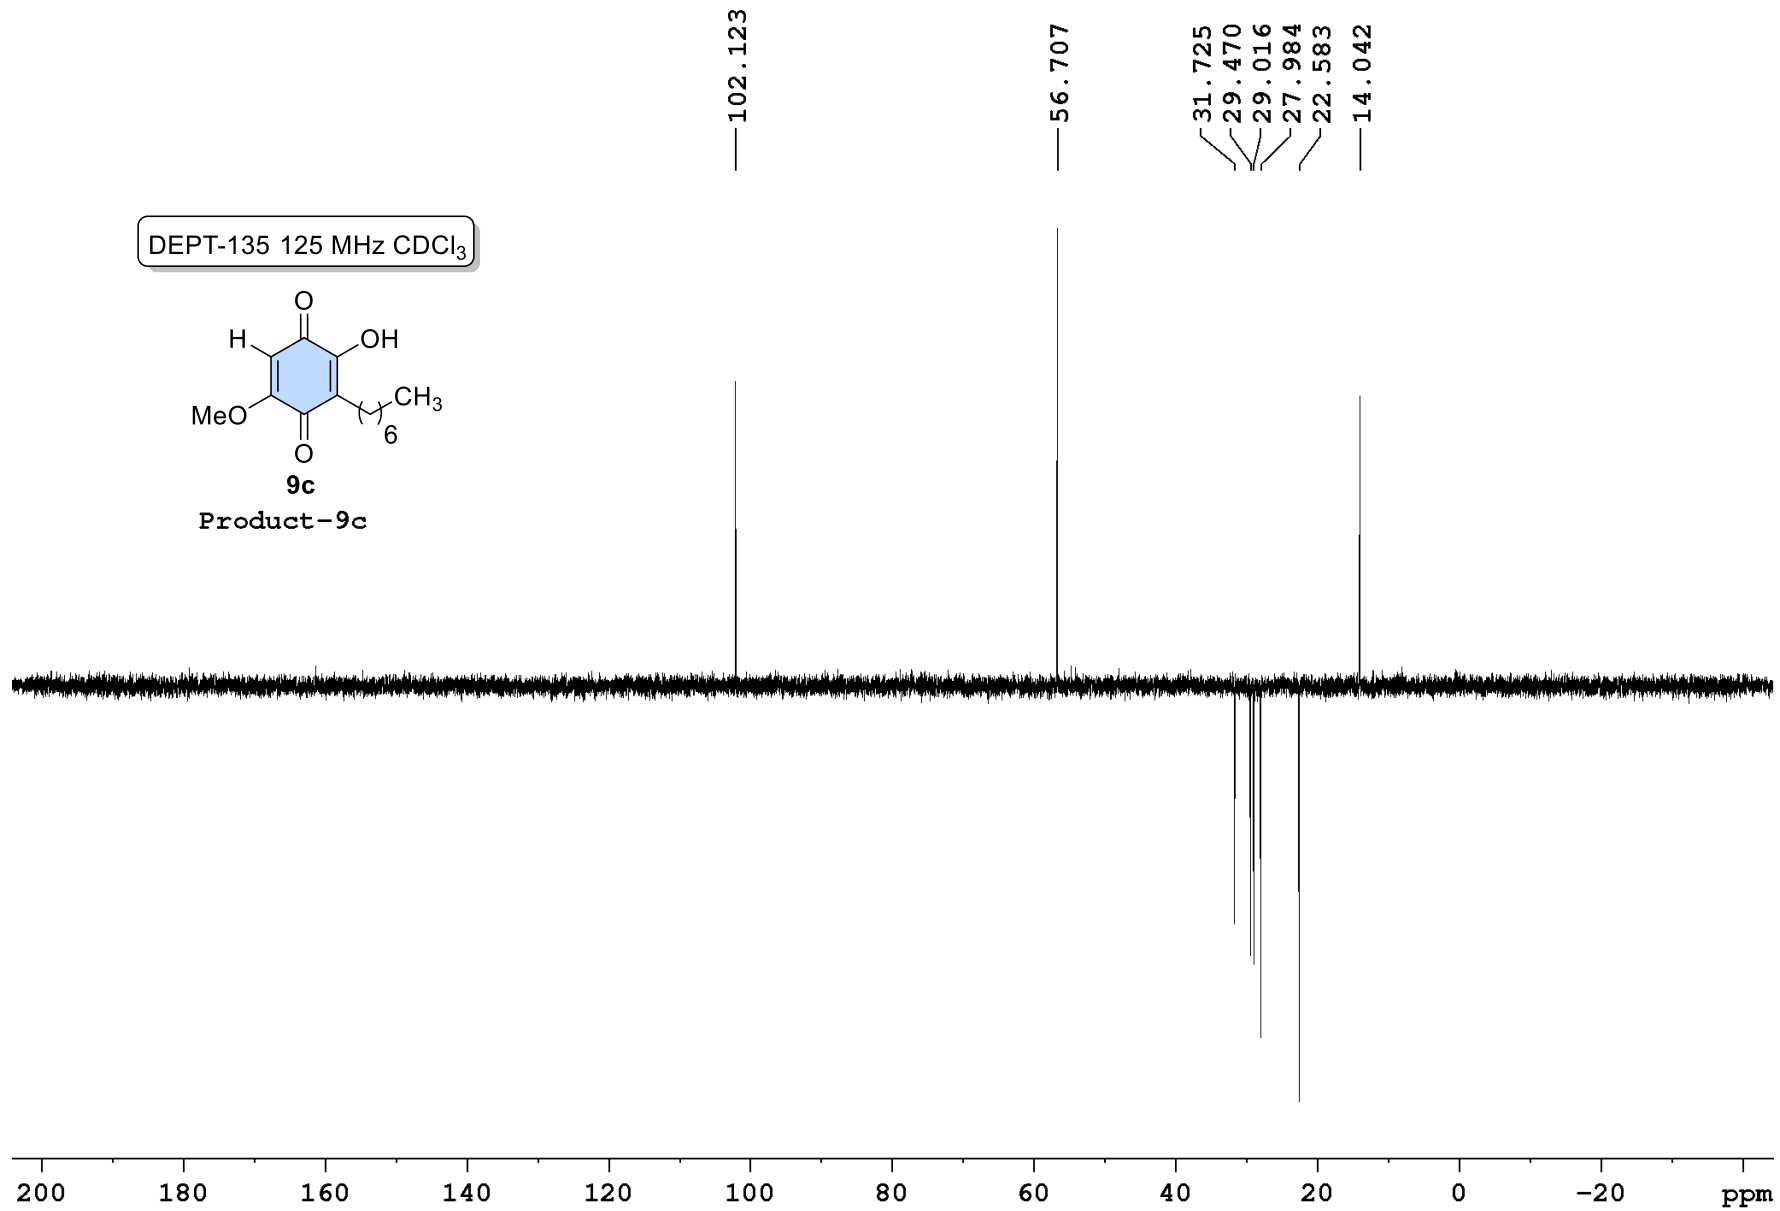

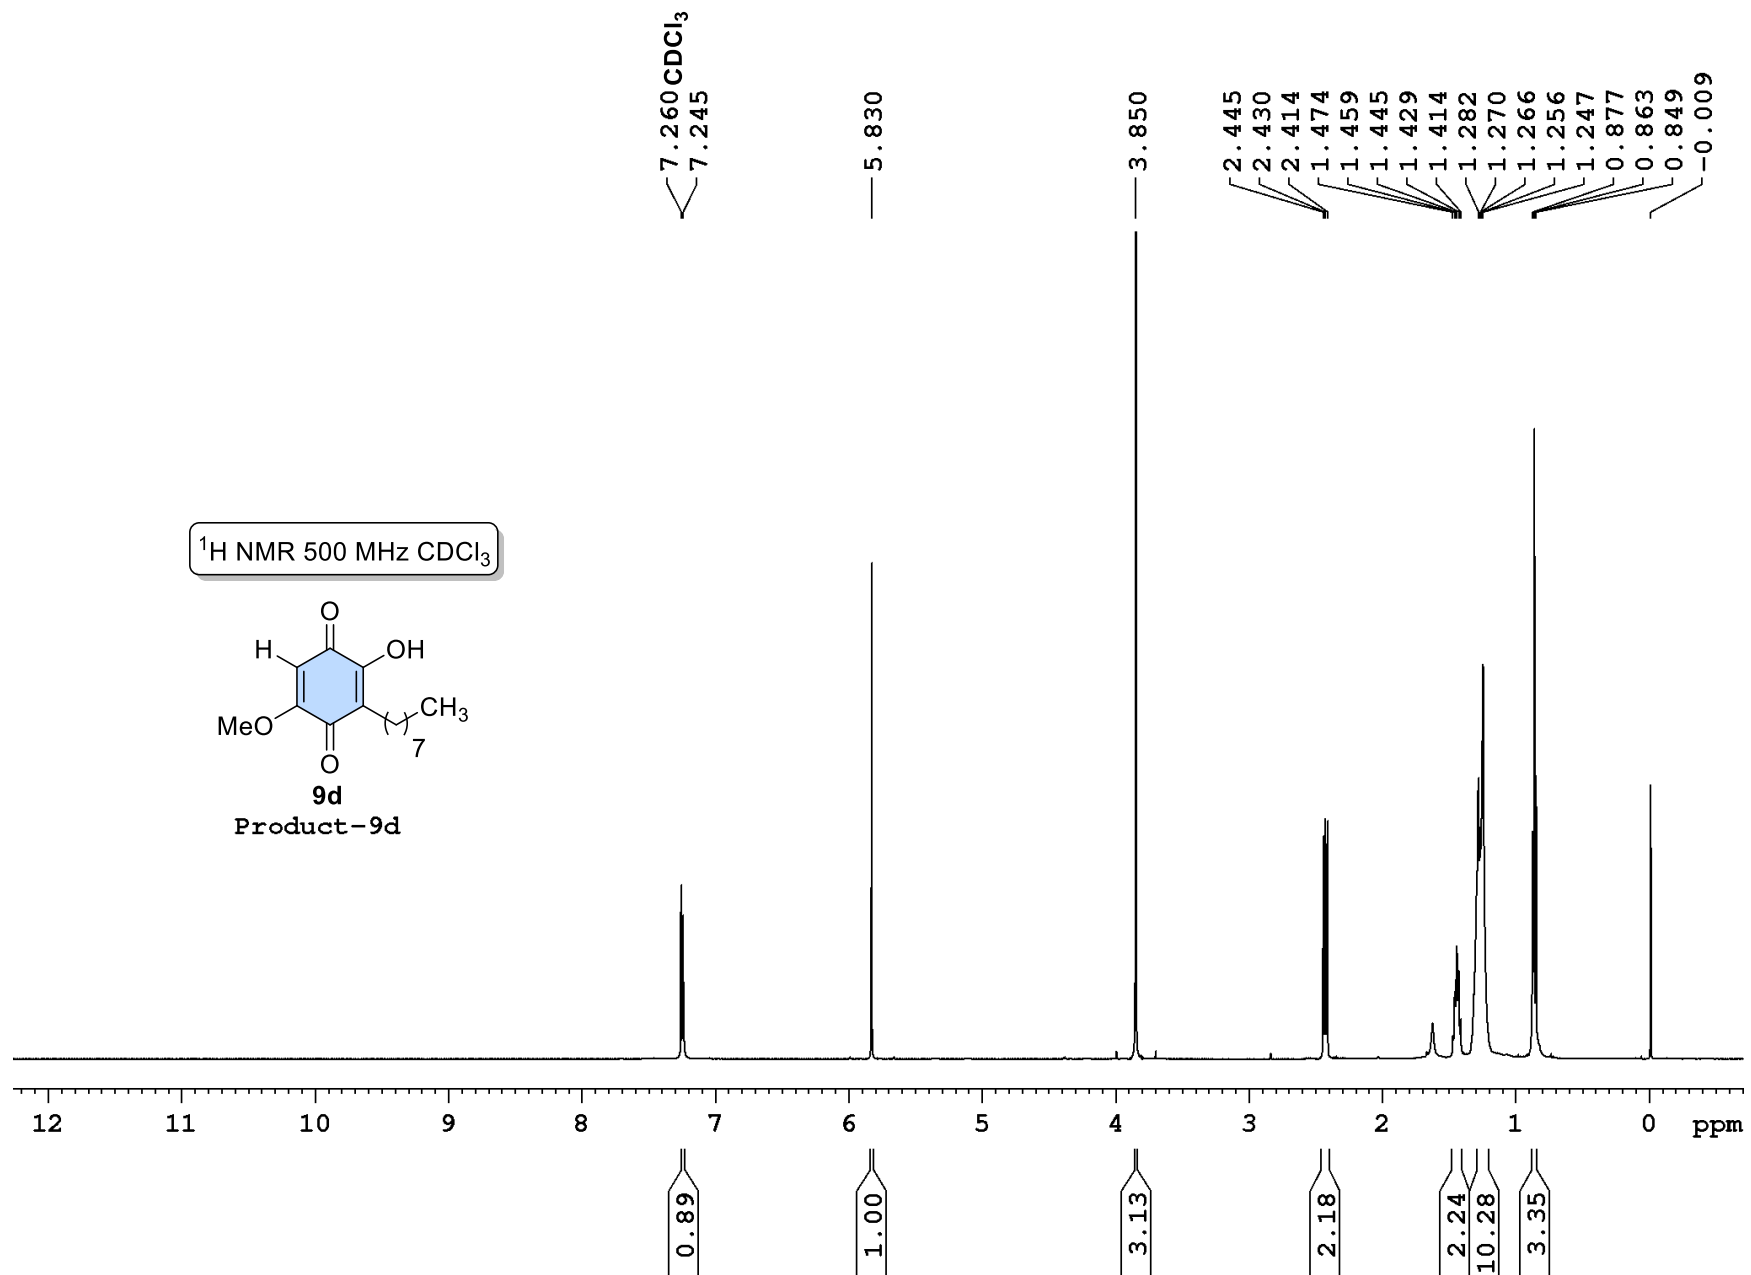

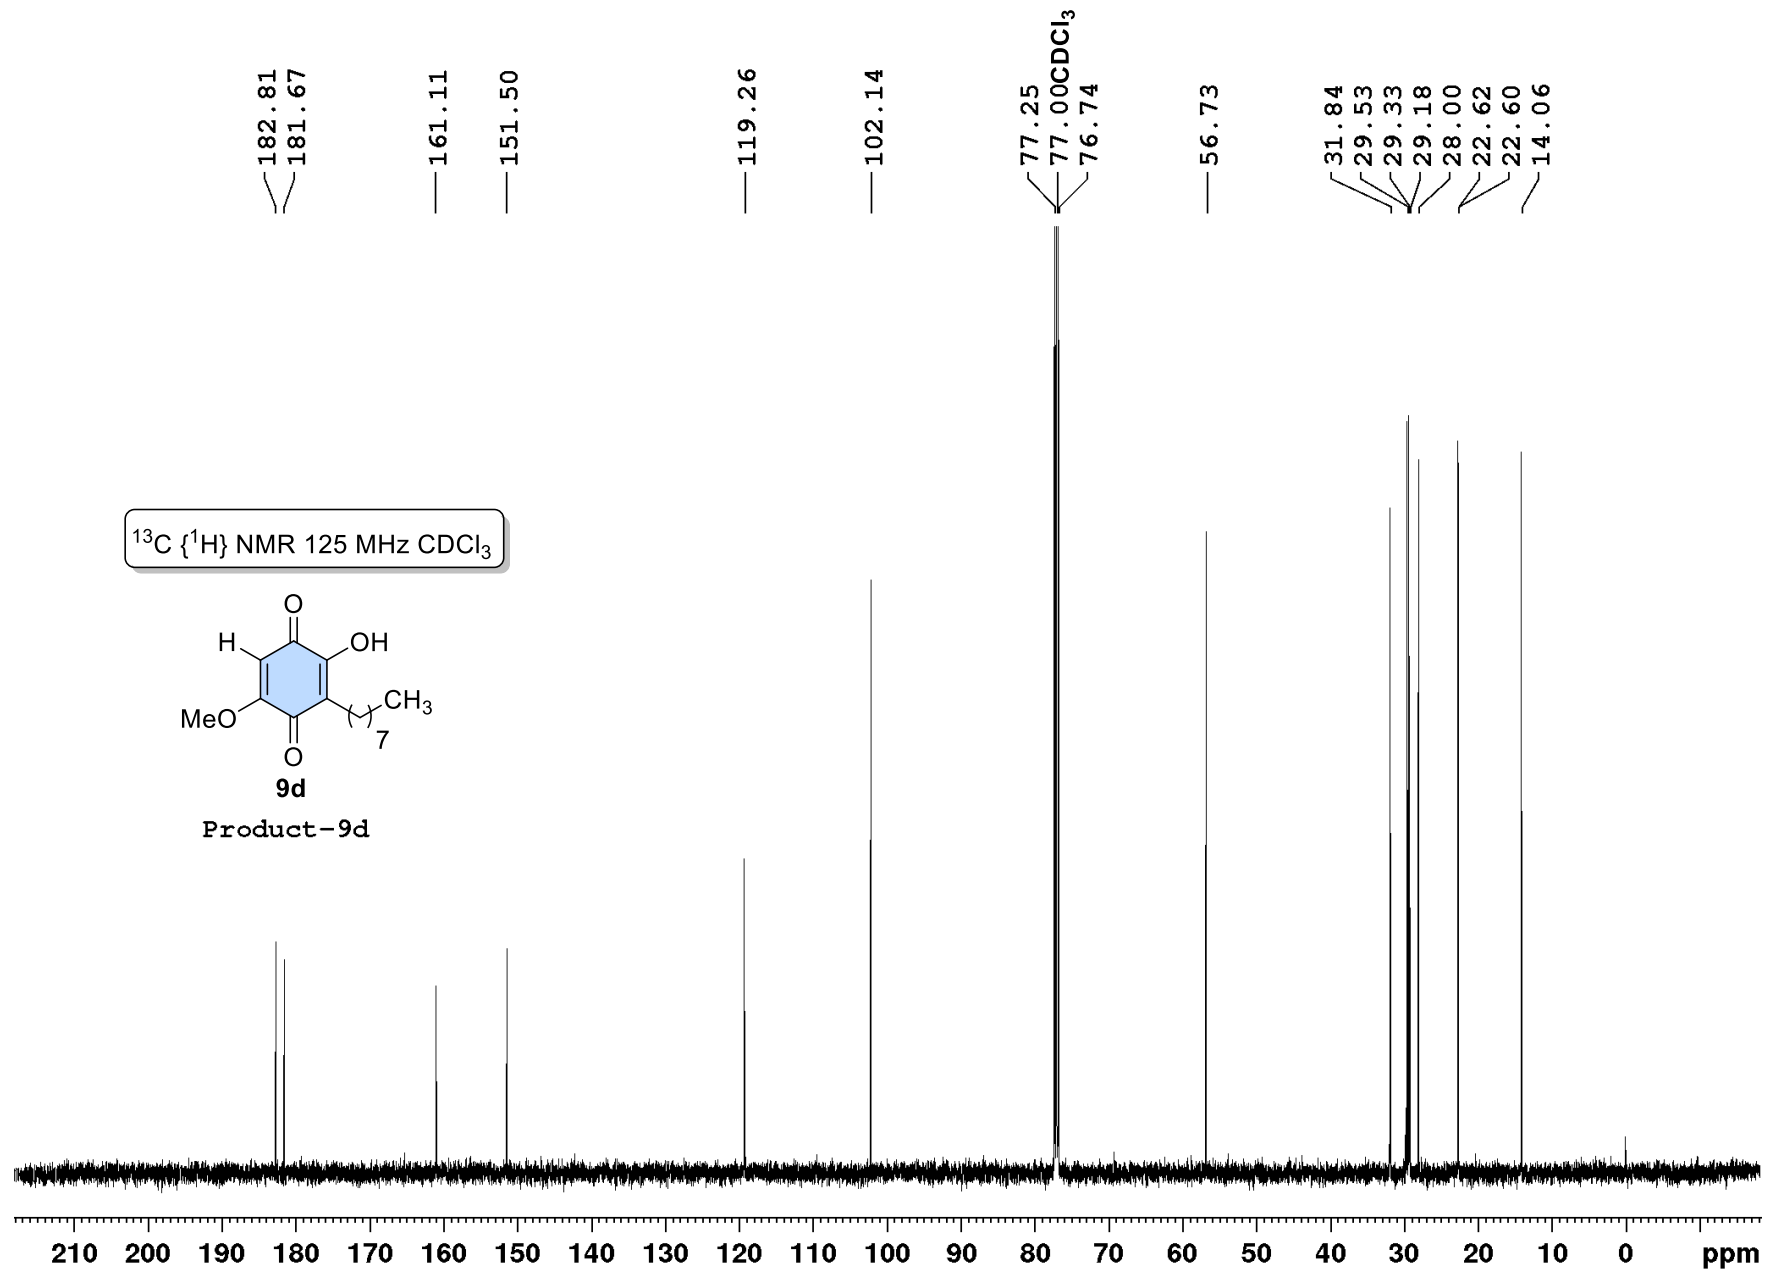

DEPT-135 125 MHz CDCl<sub>3</sub>

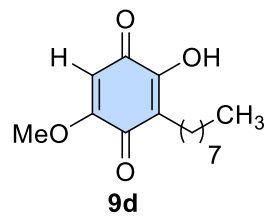

Product-9d

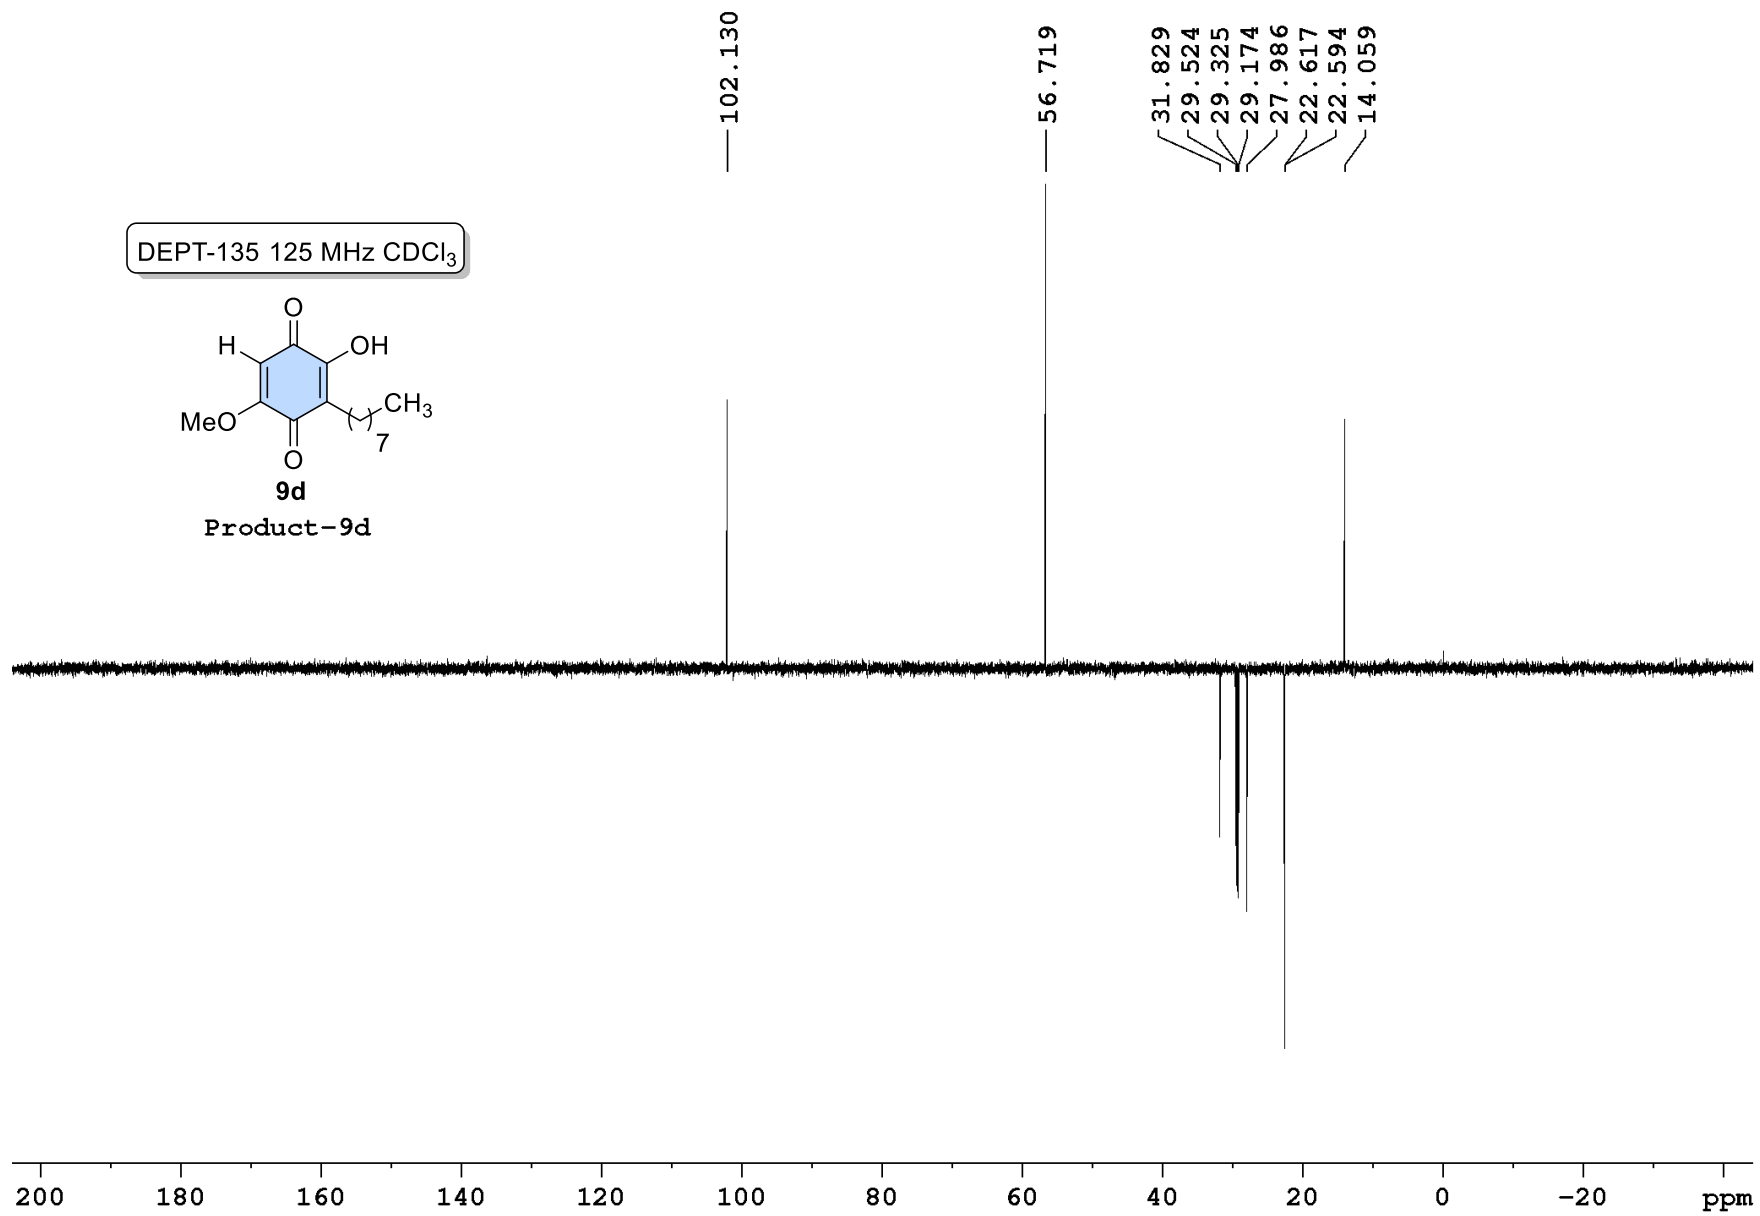

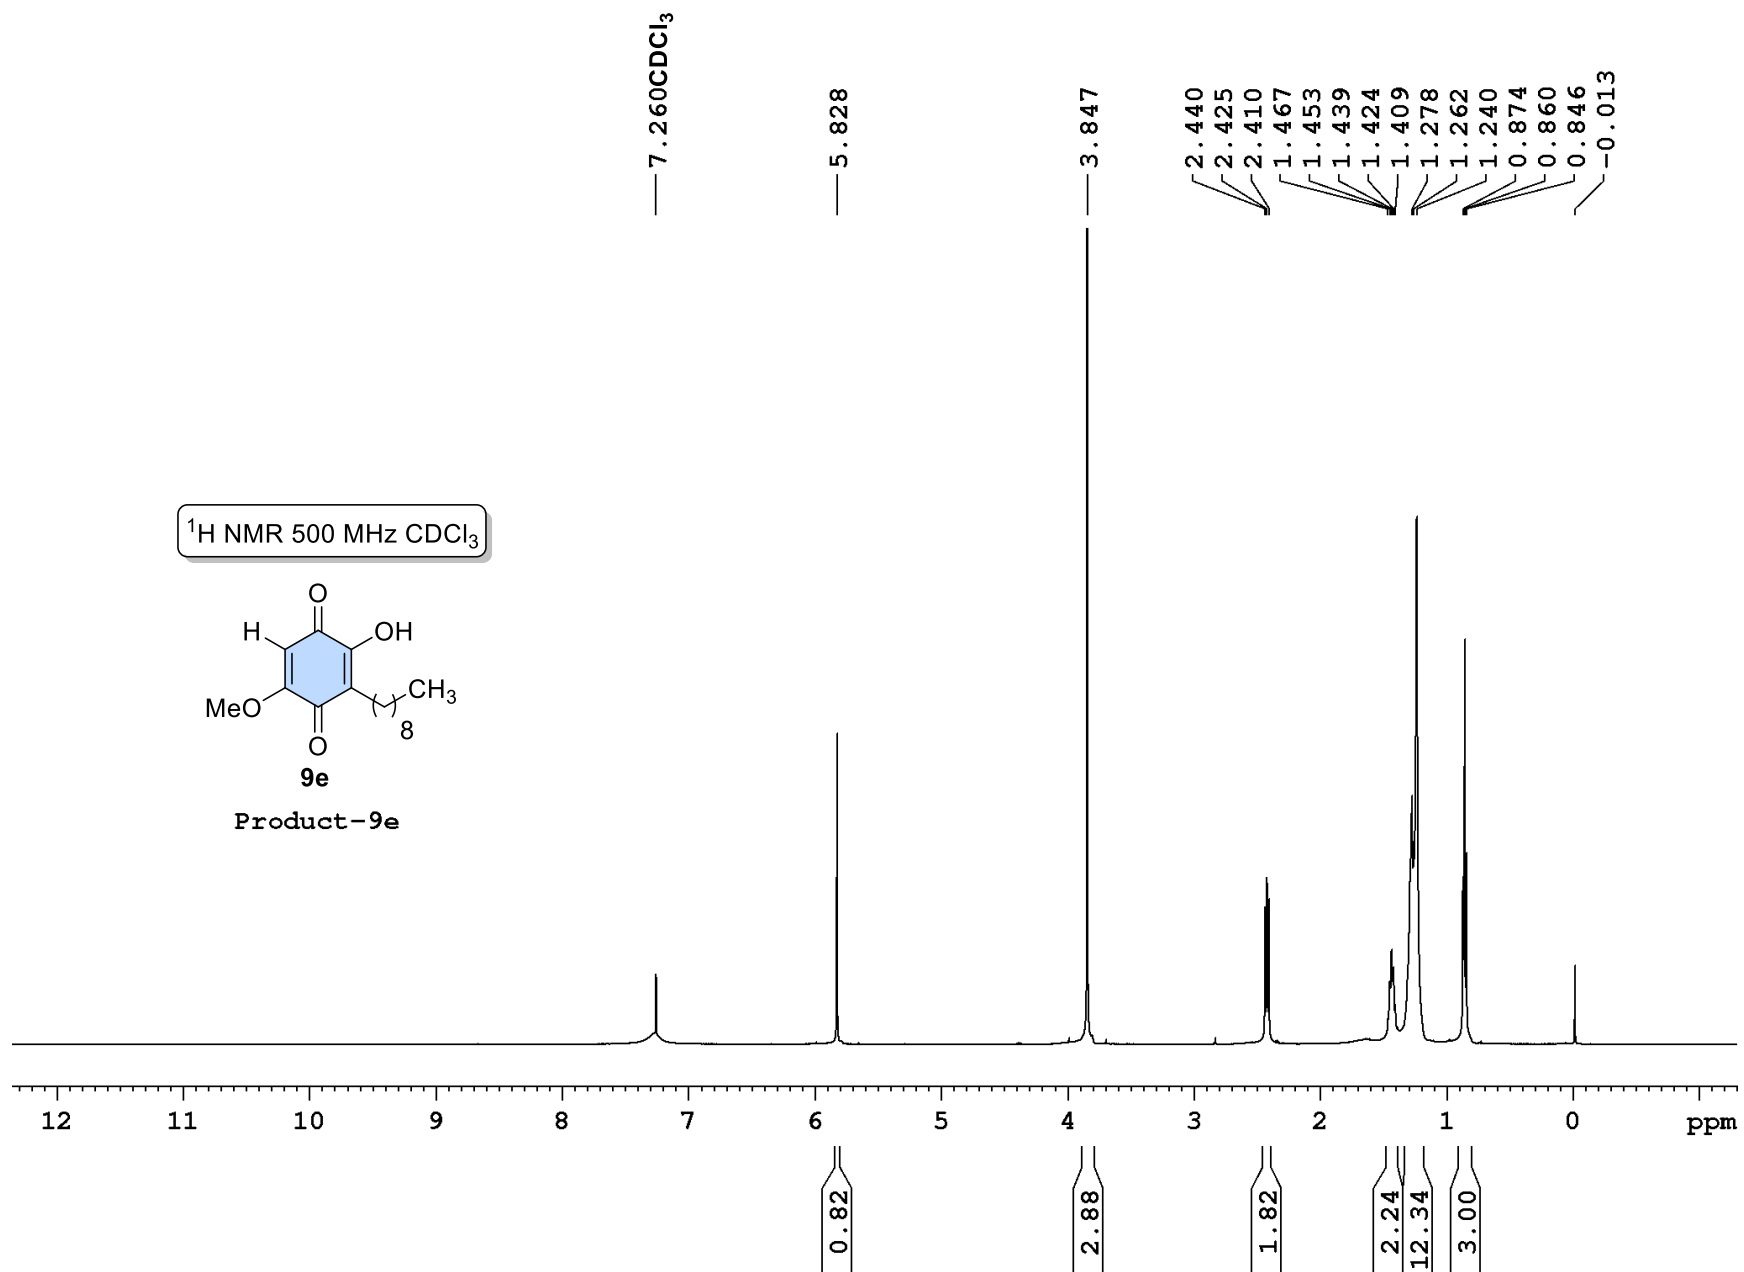



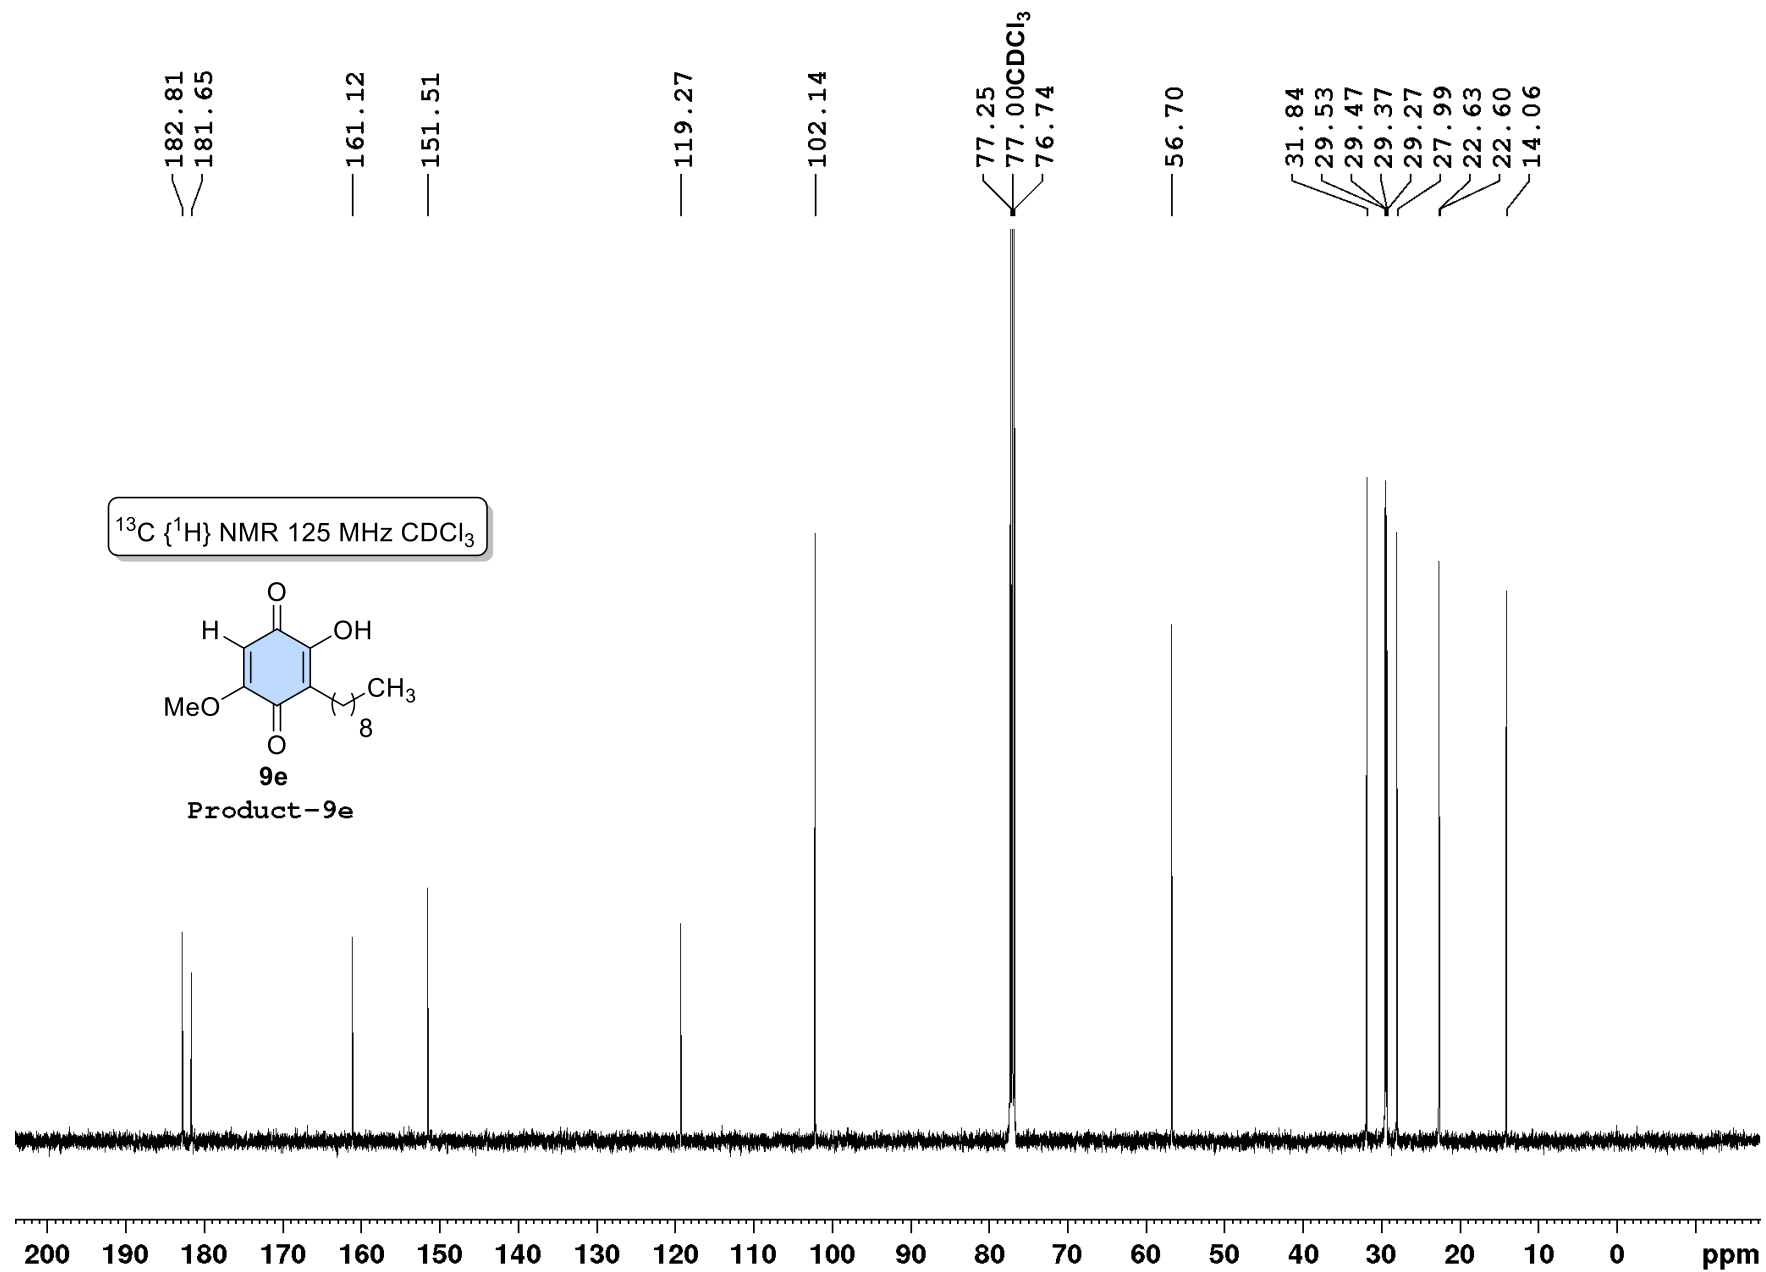

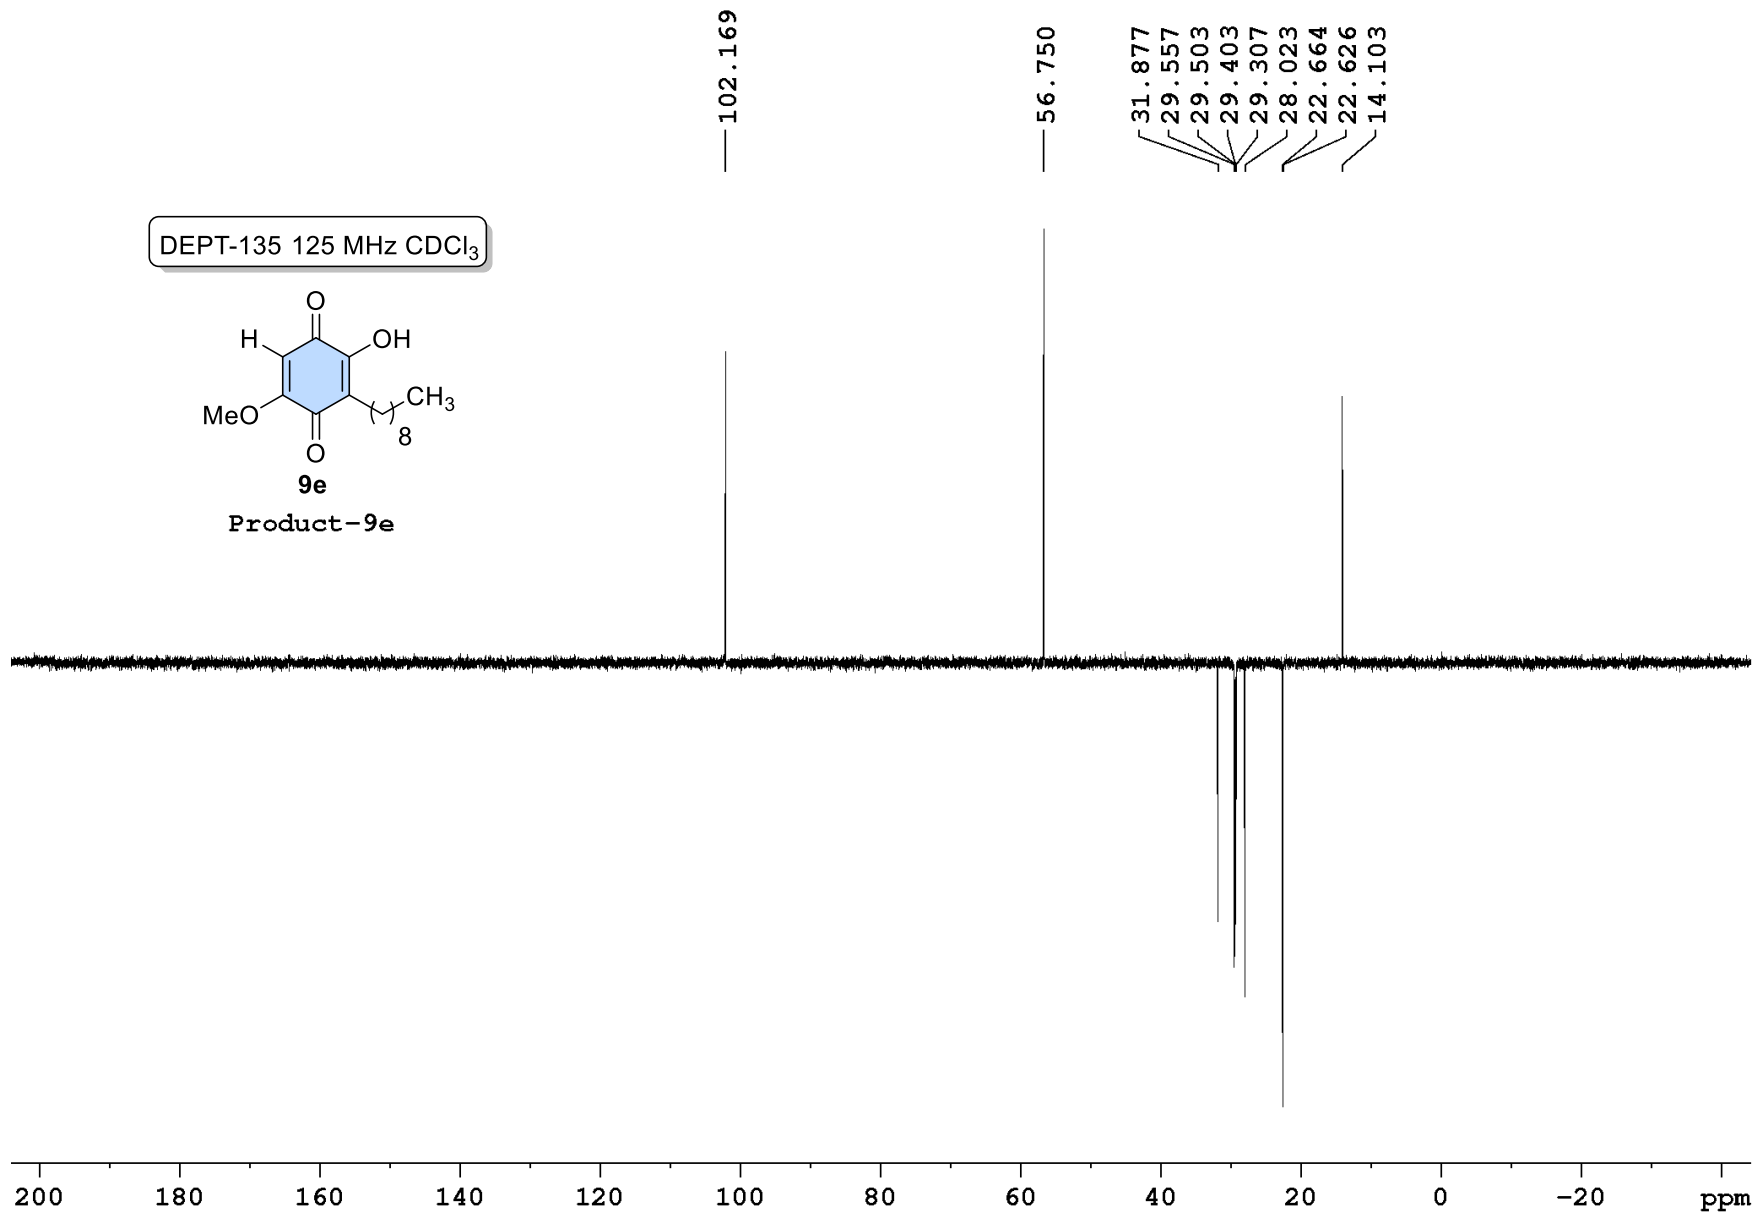

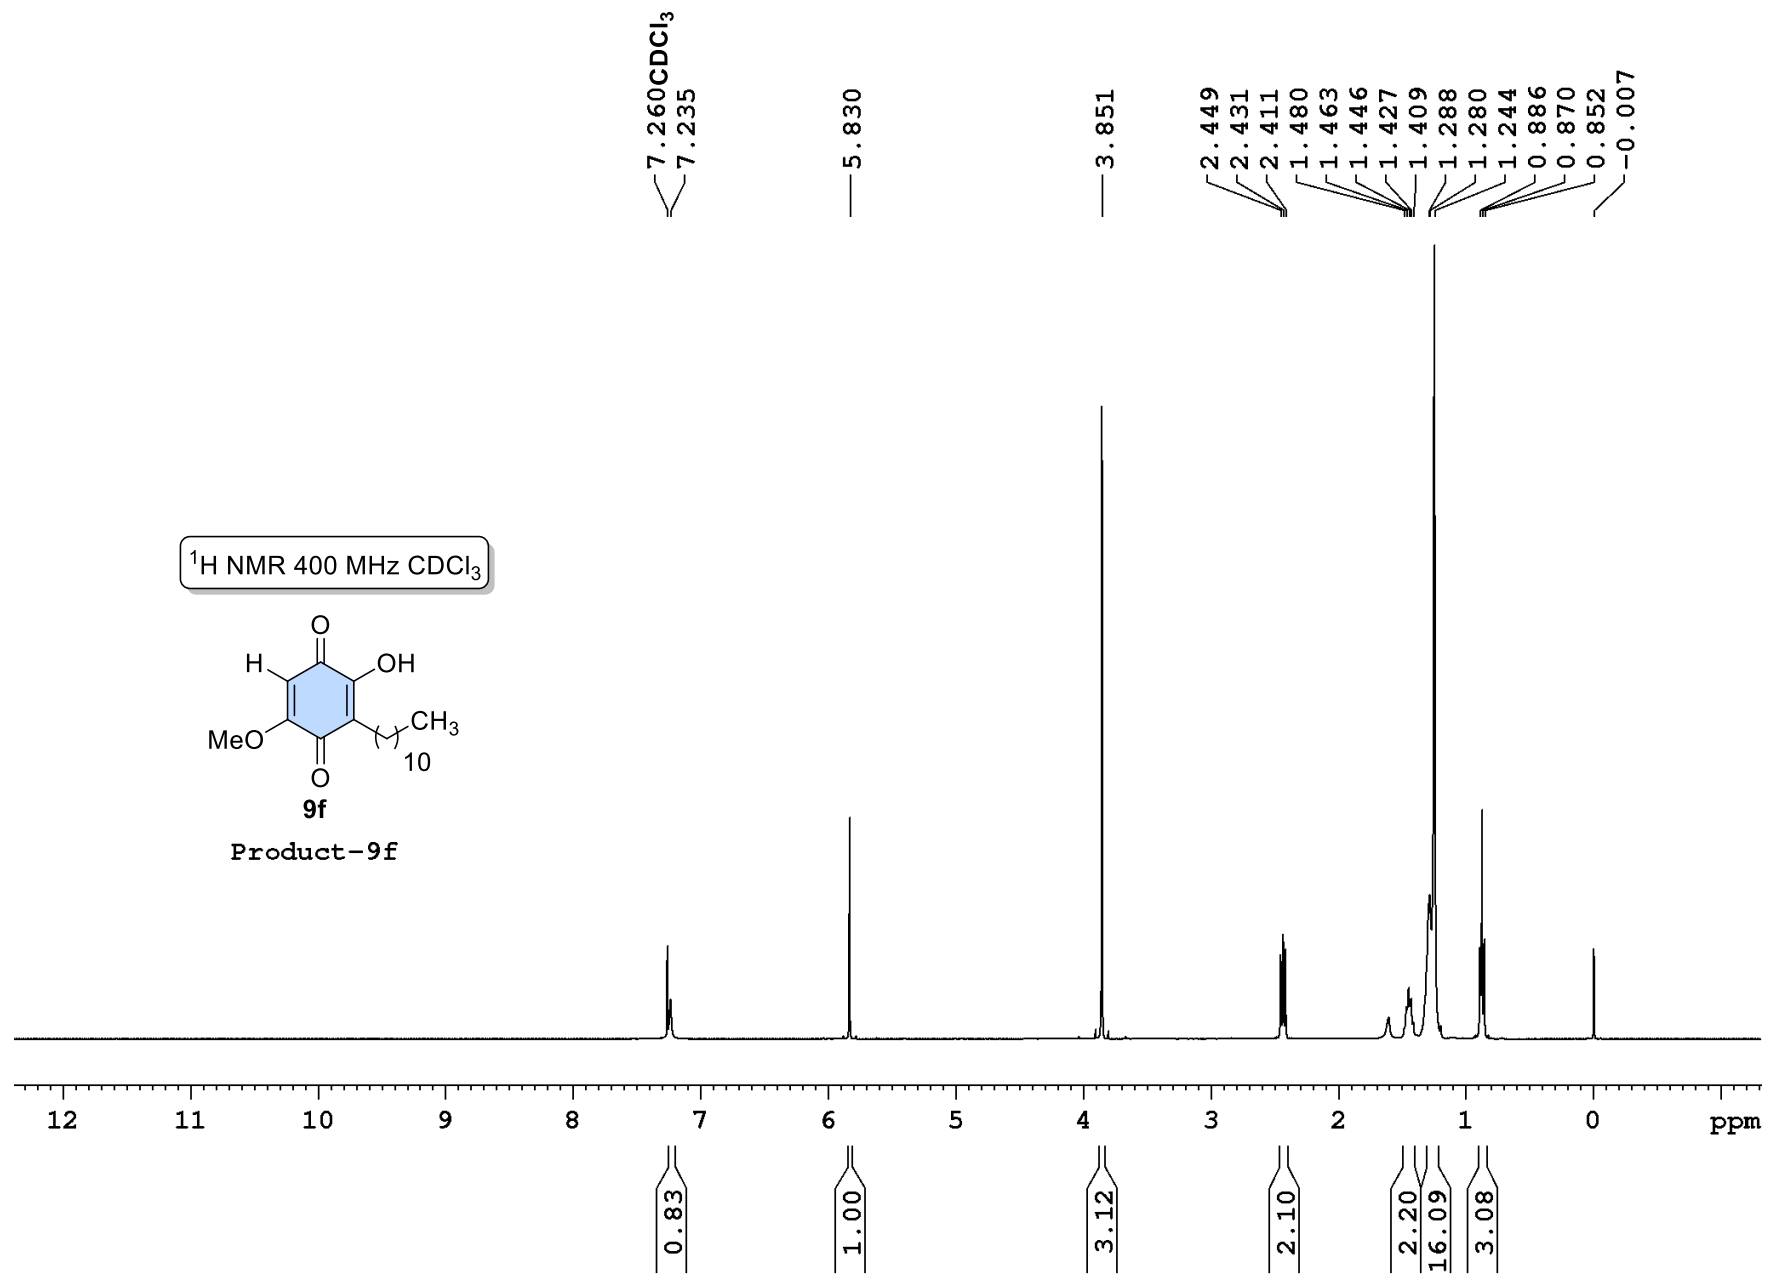

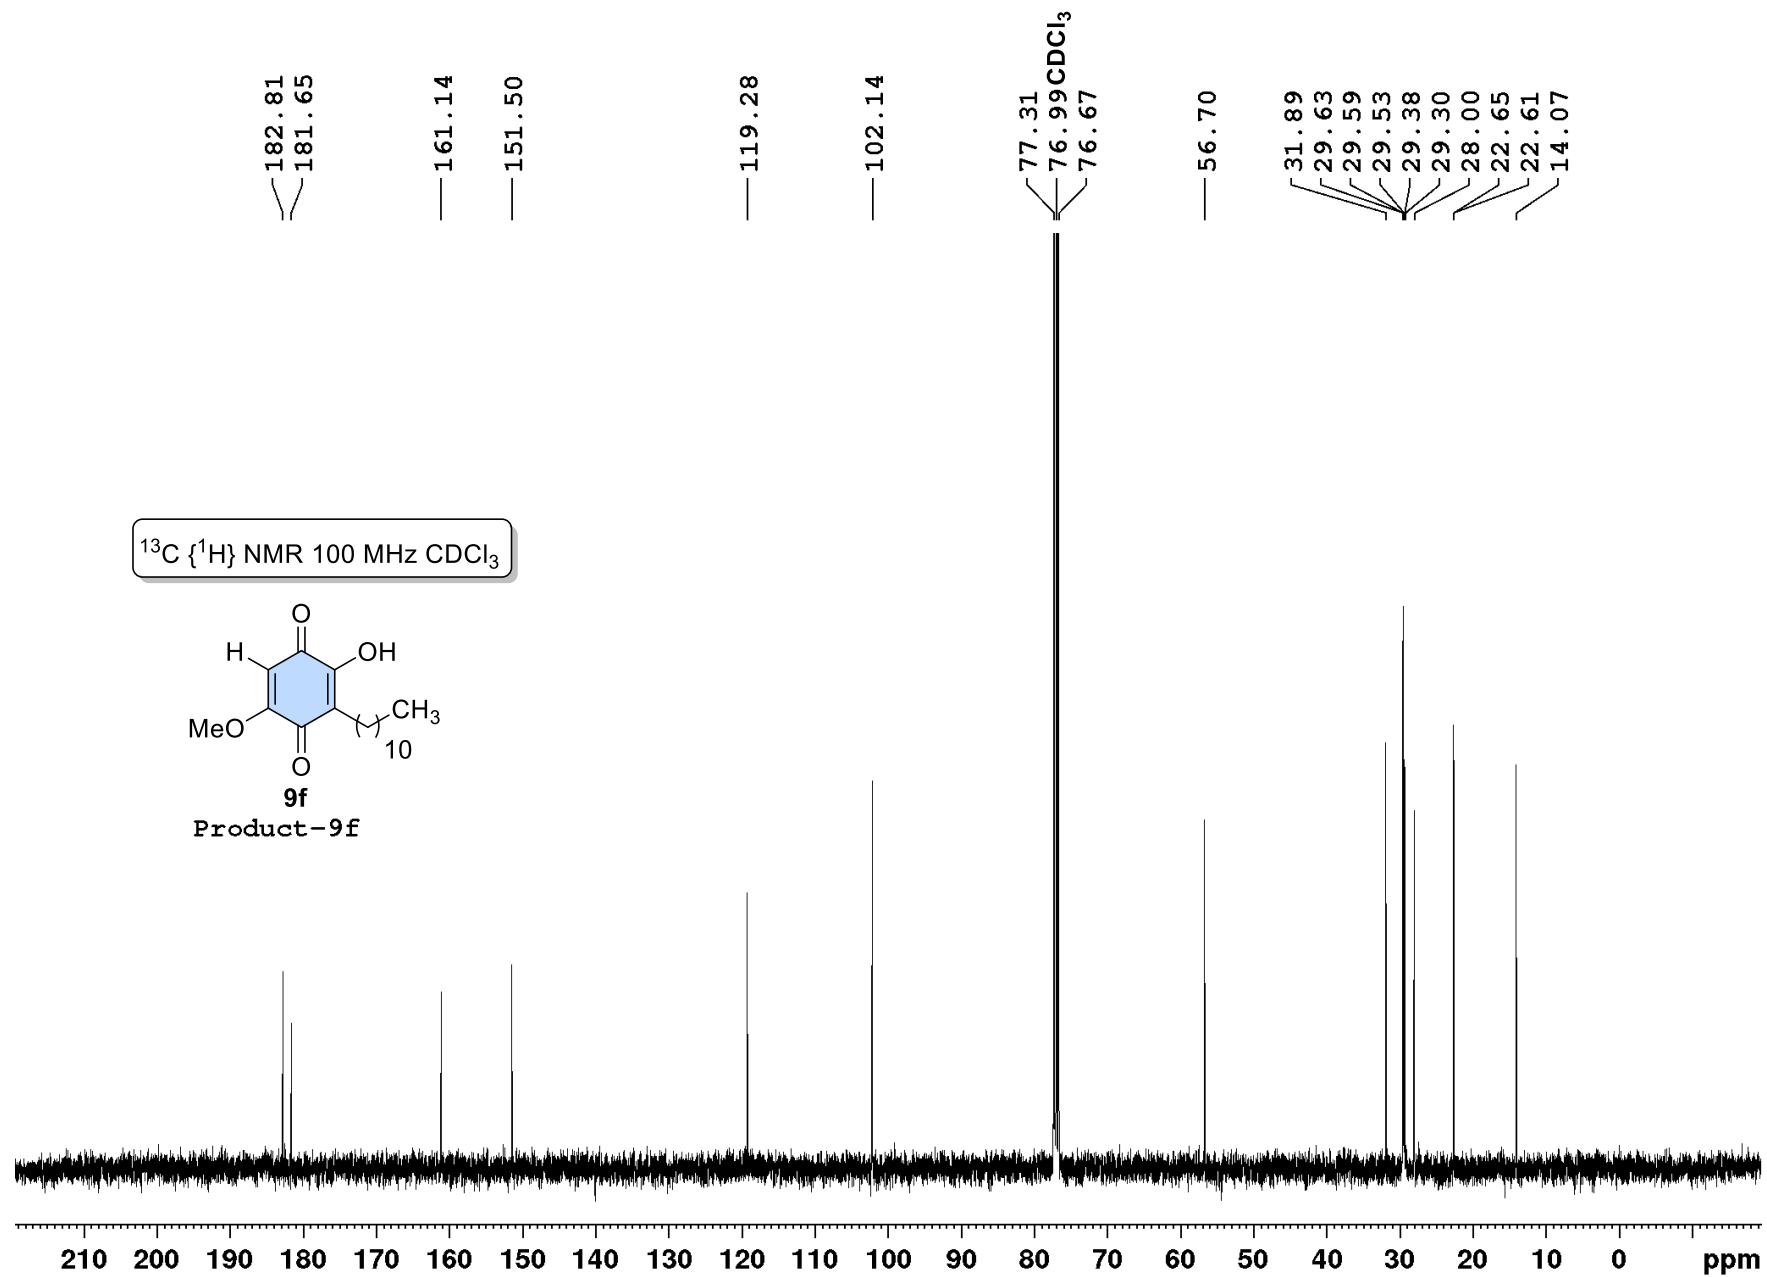

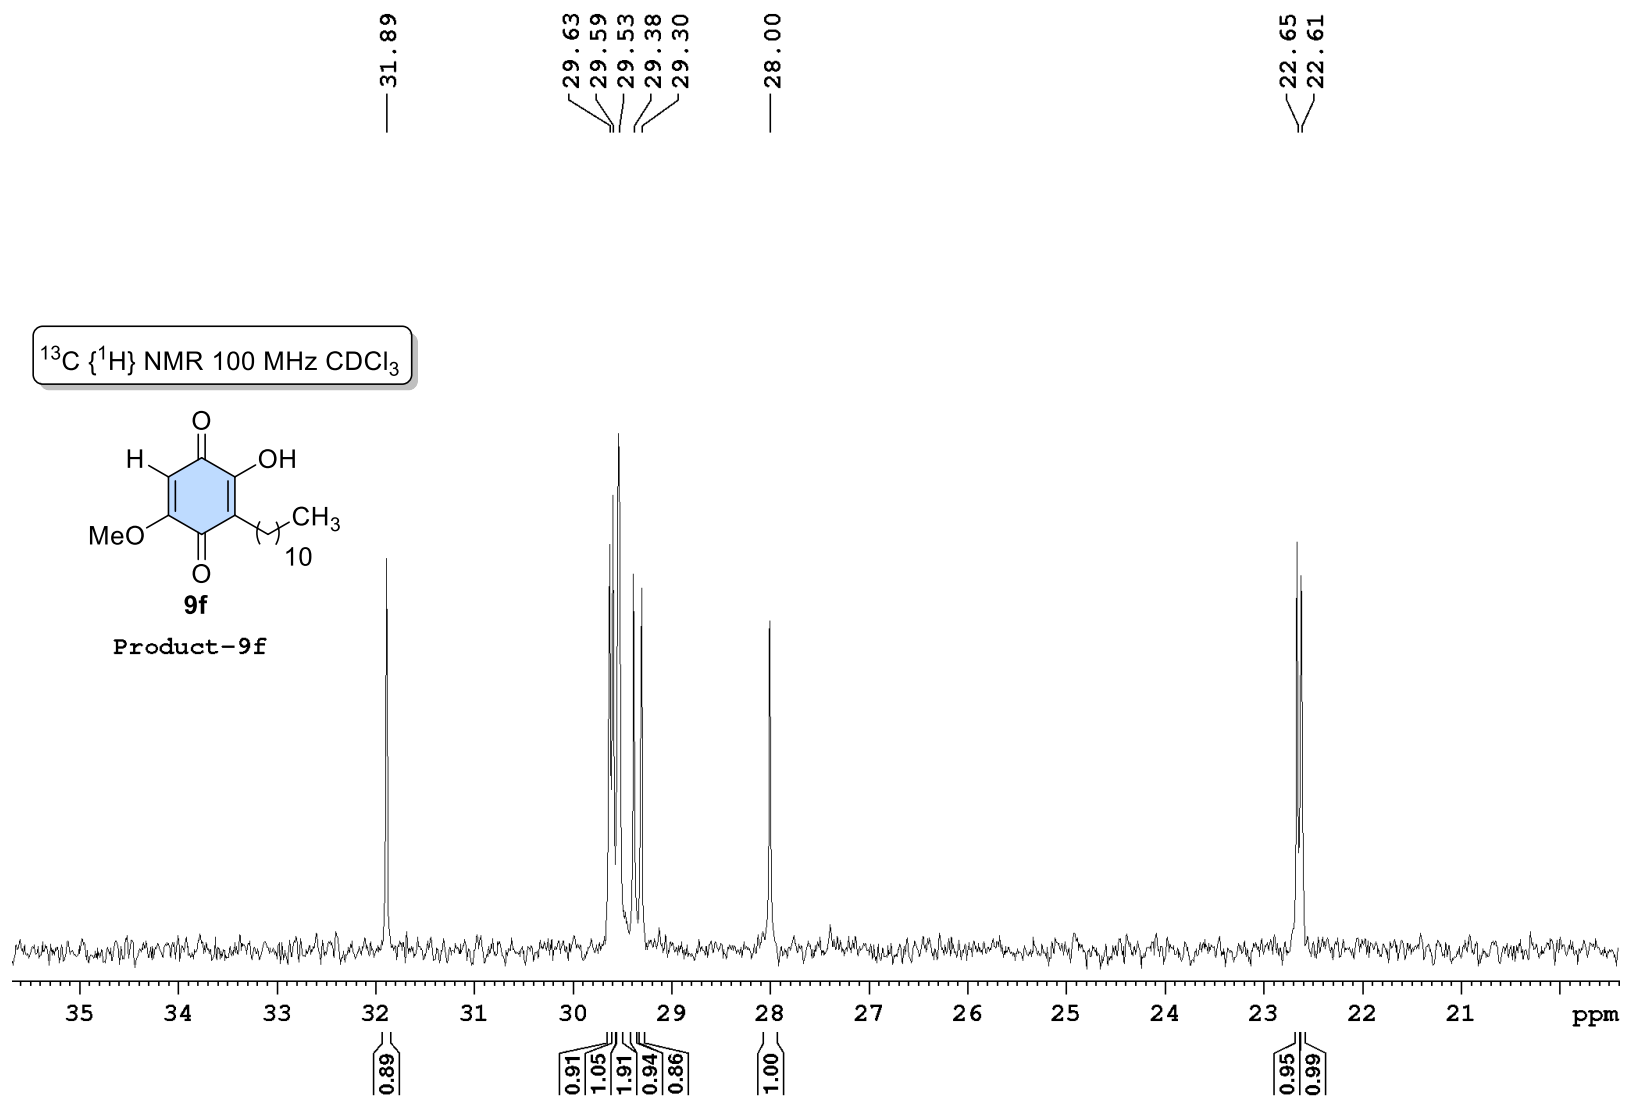

DEPT-135 100 MHz CDCl<sub>3</sub>

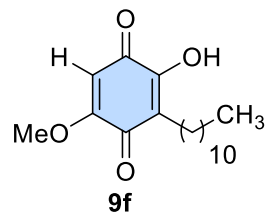

Product-9f

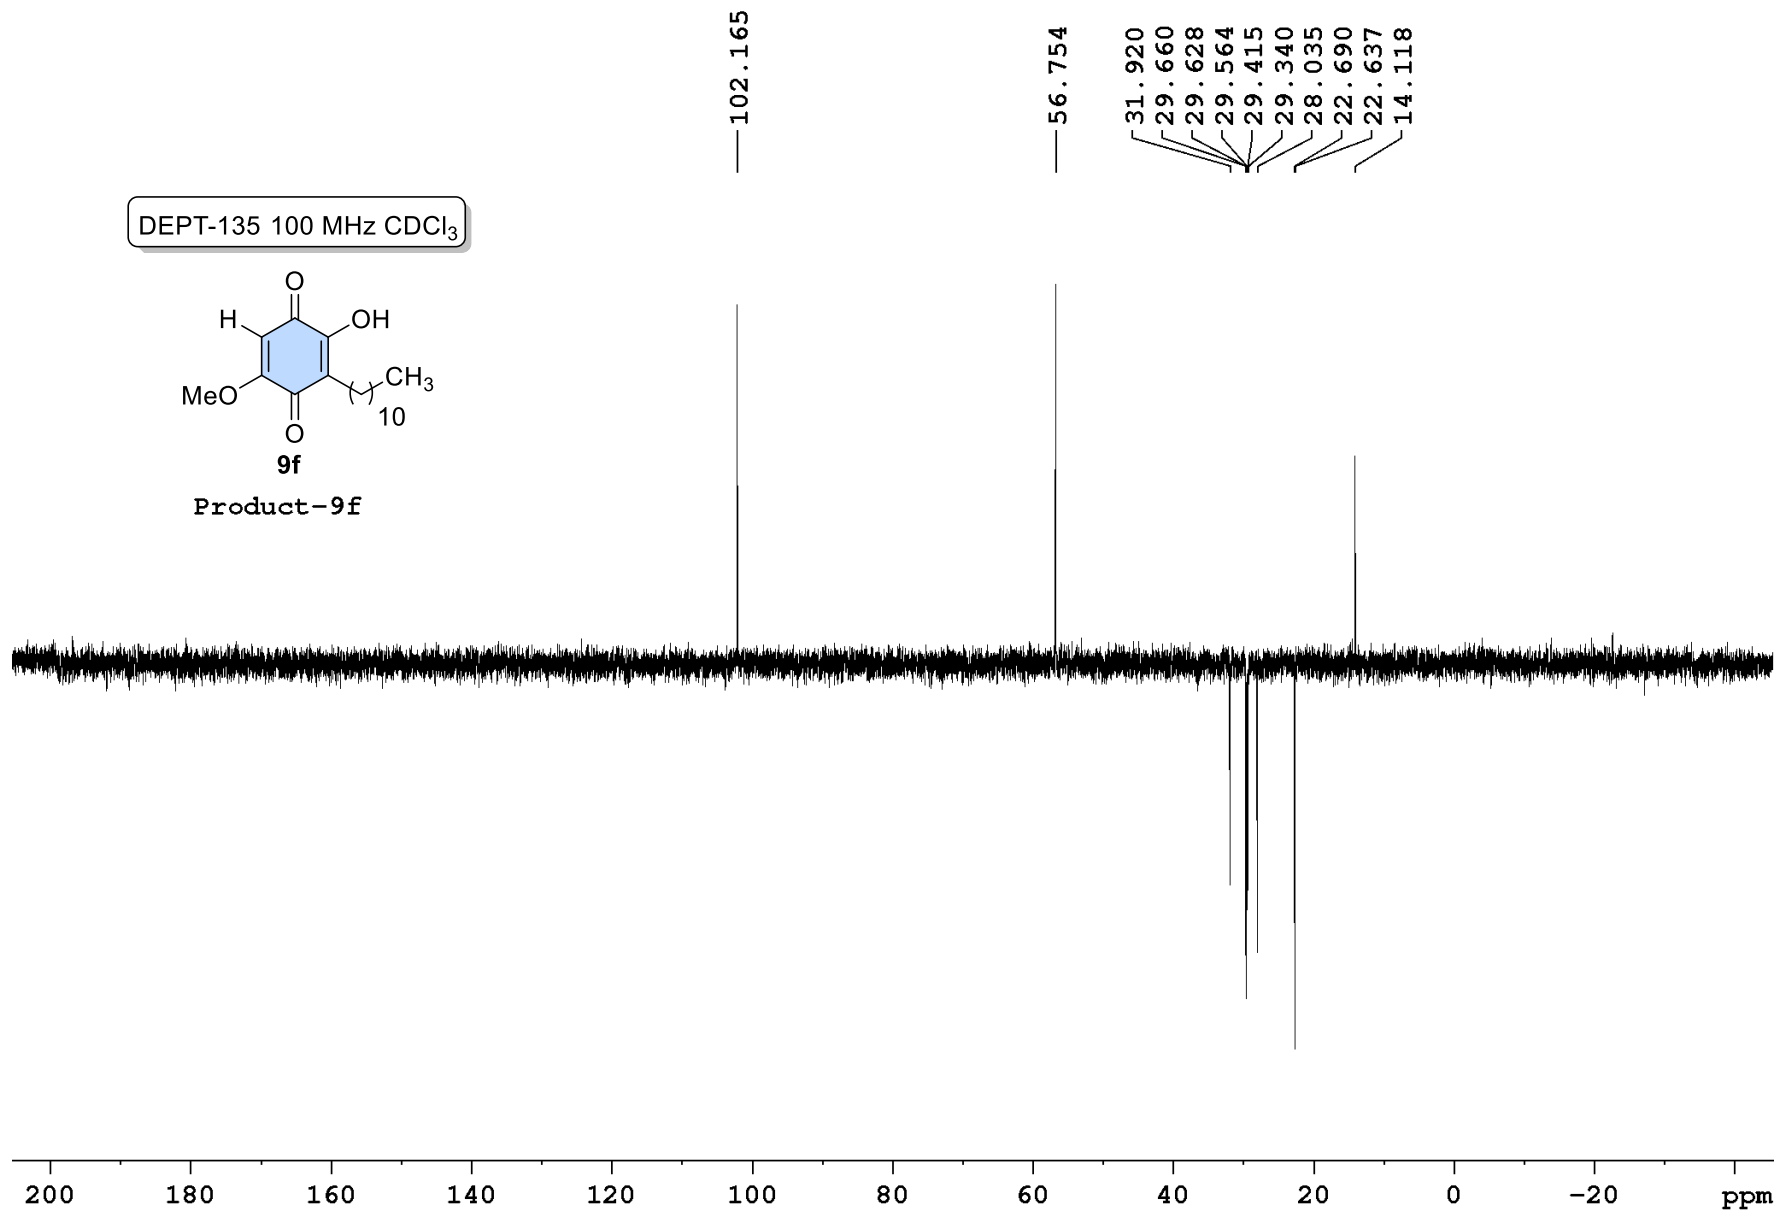

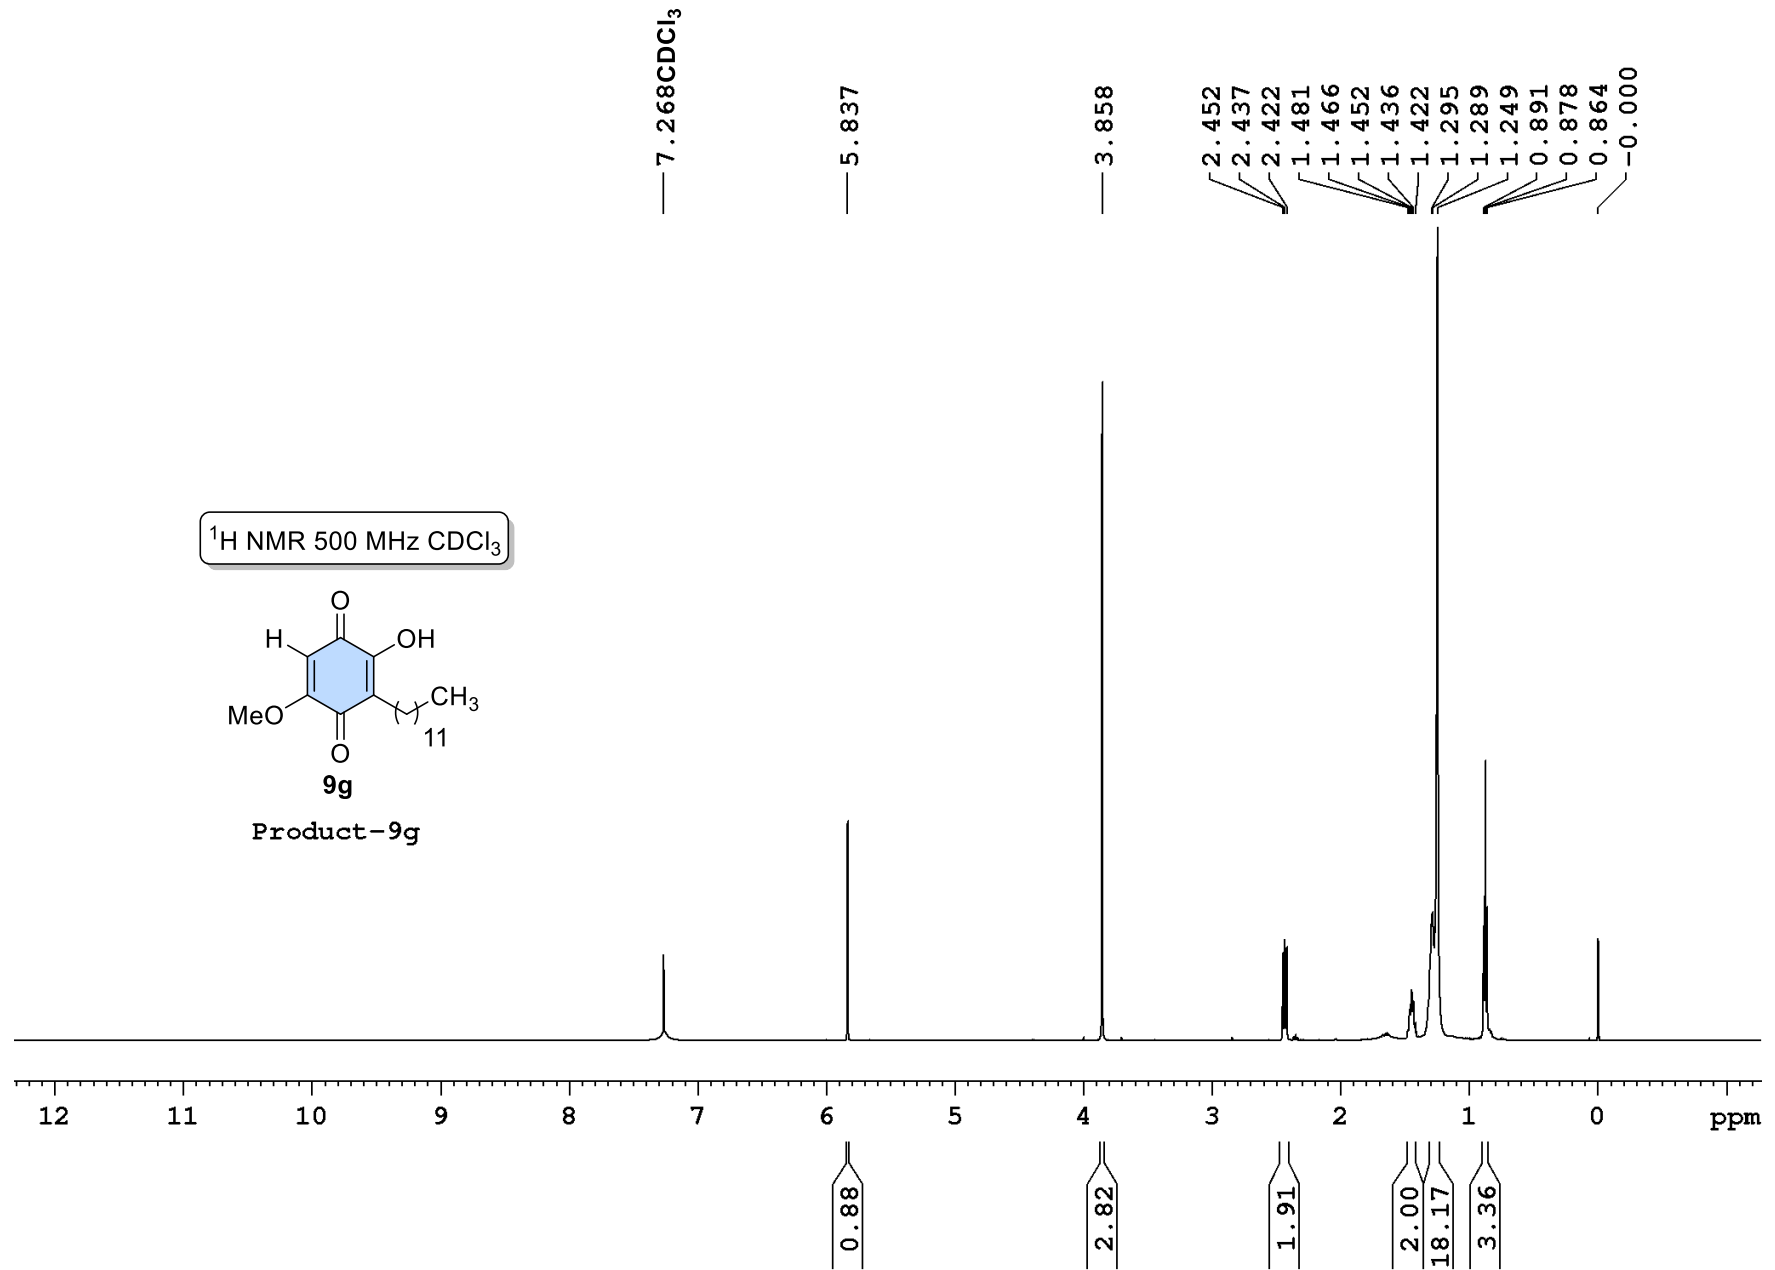

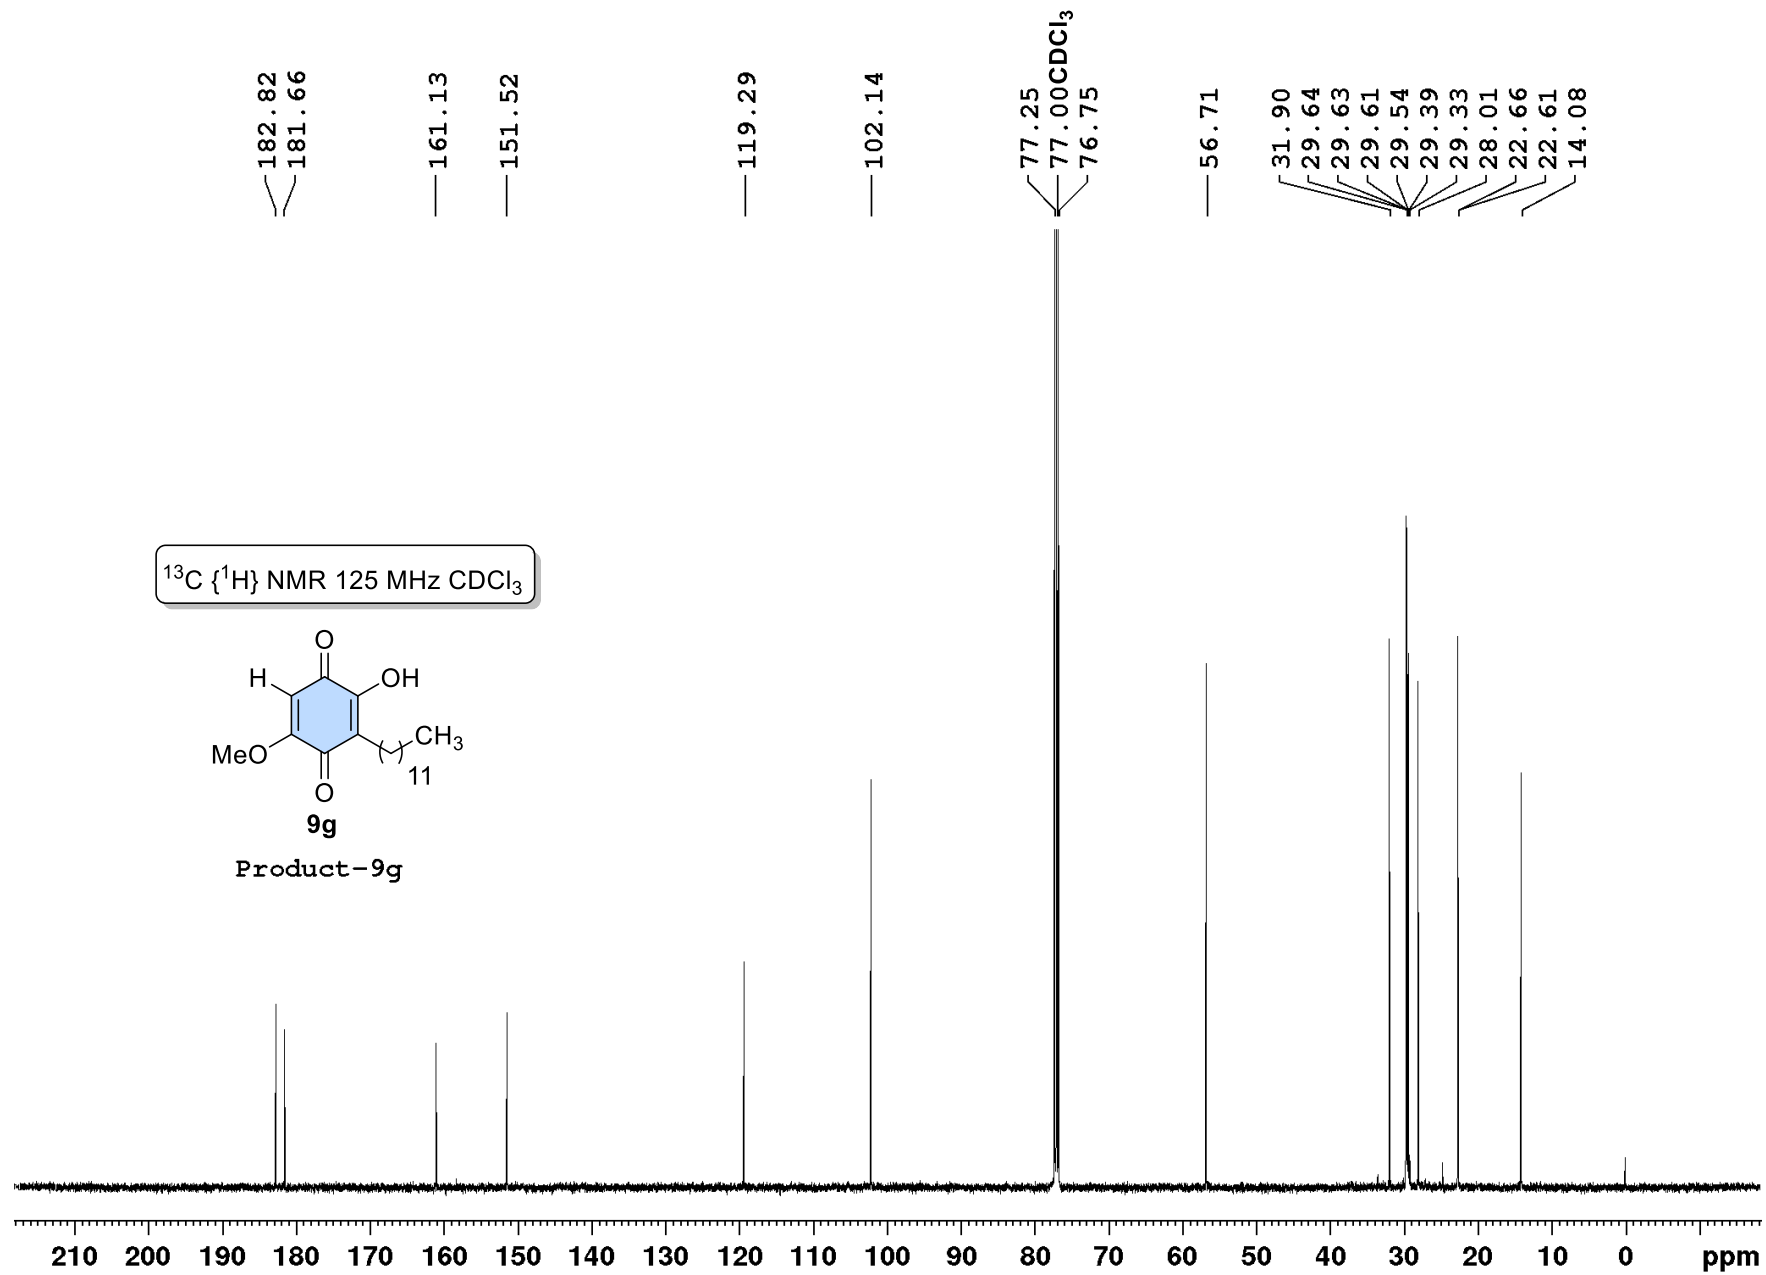



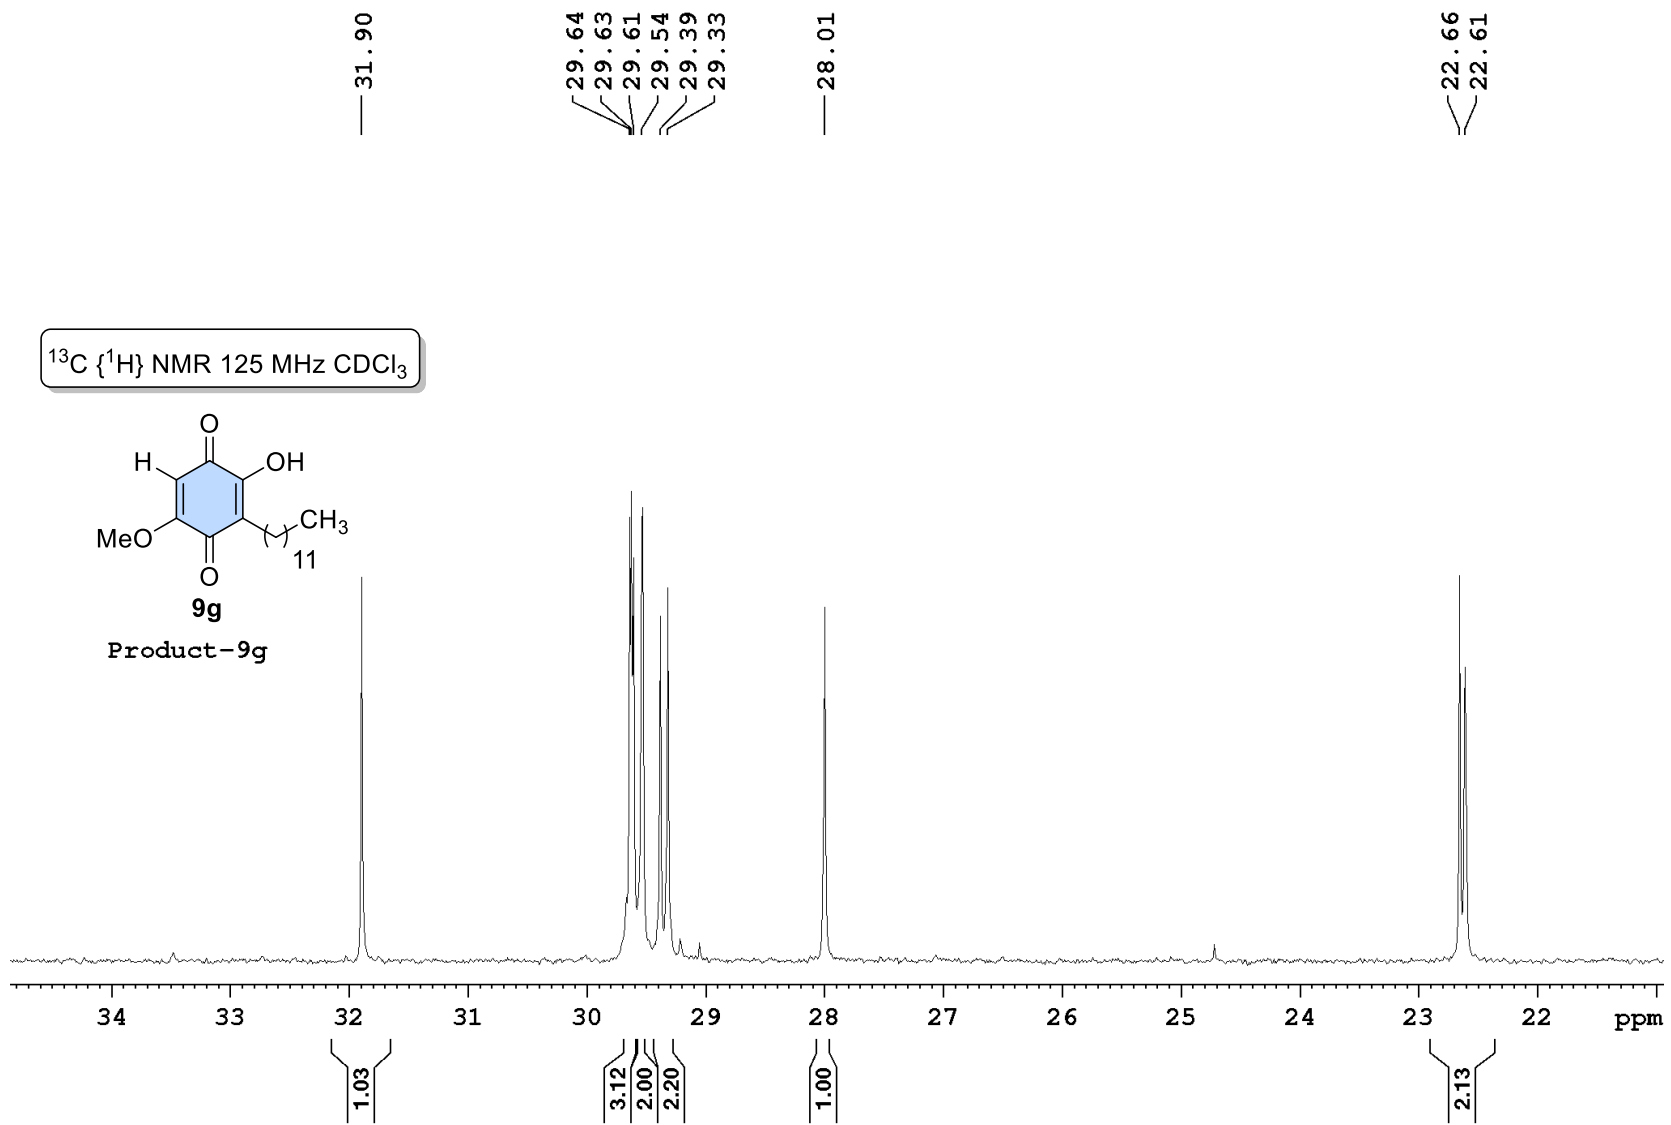

DEPT-135 125 MHz CDCl<sub>3</sub>

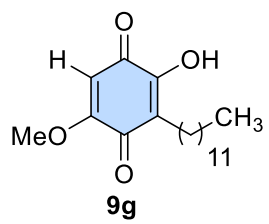

Product-9g

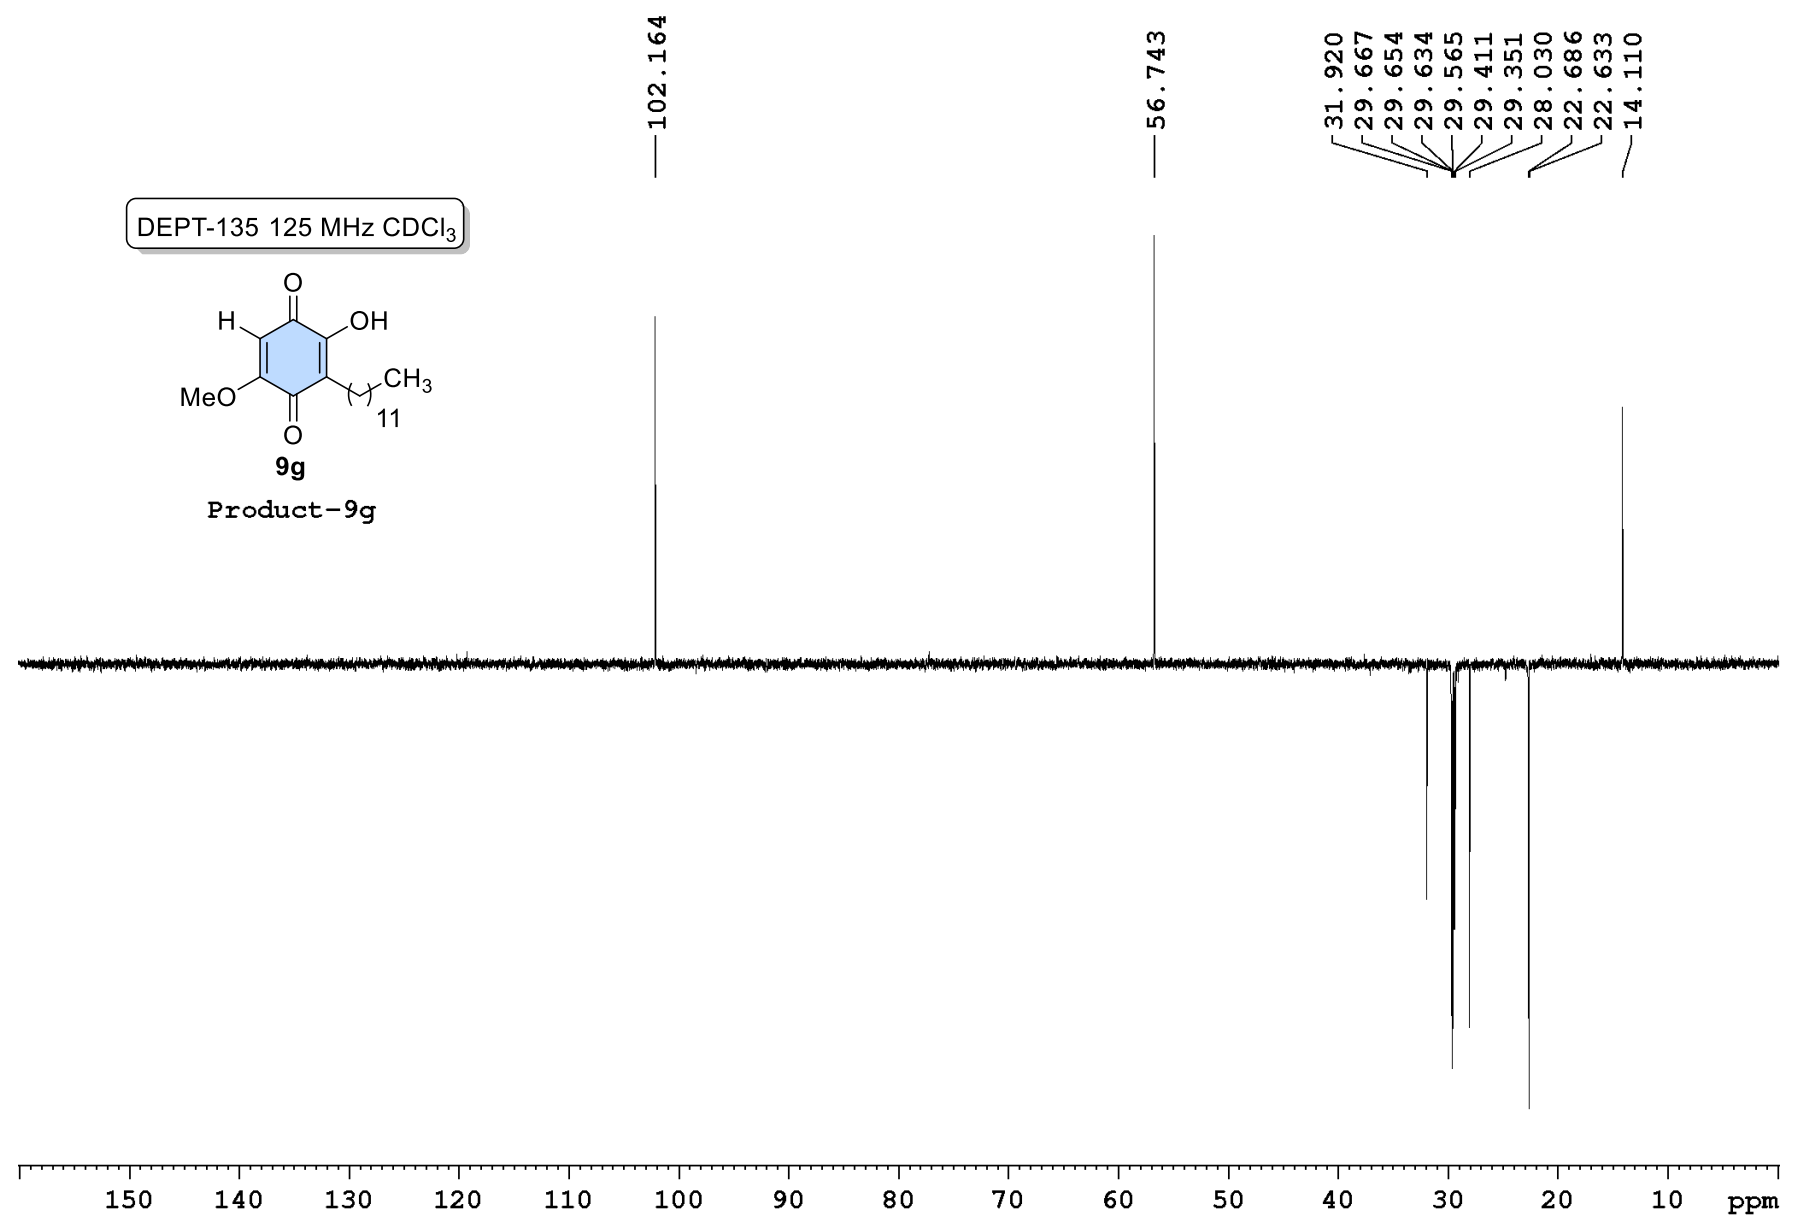

<sup>1</sup>H NMR 500 MHz CDCl<sub>3</sub>

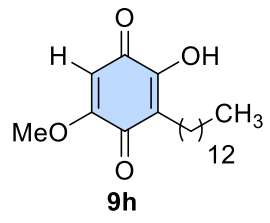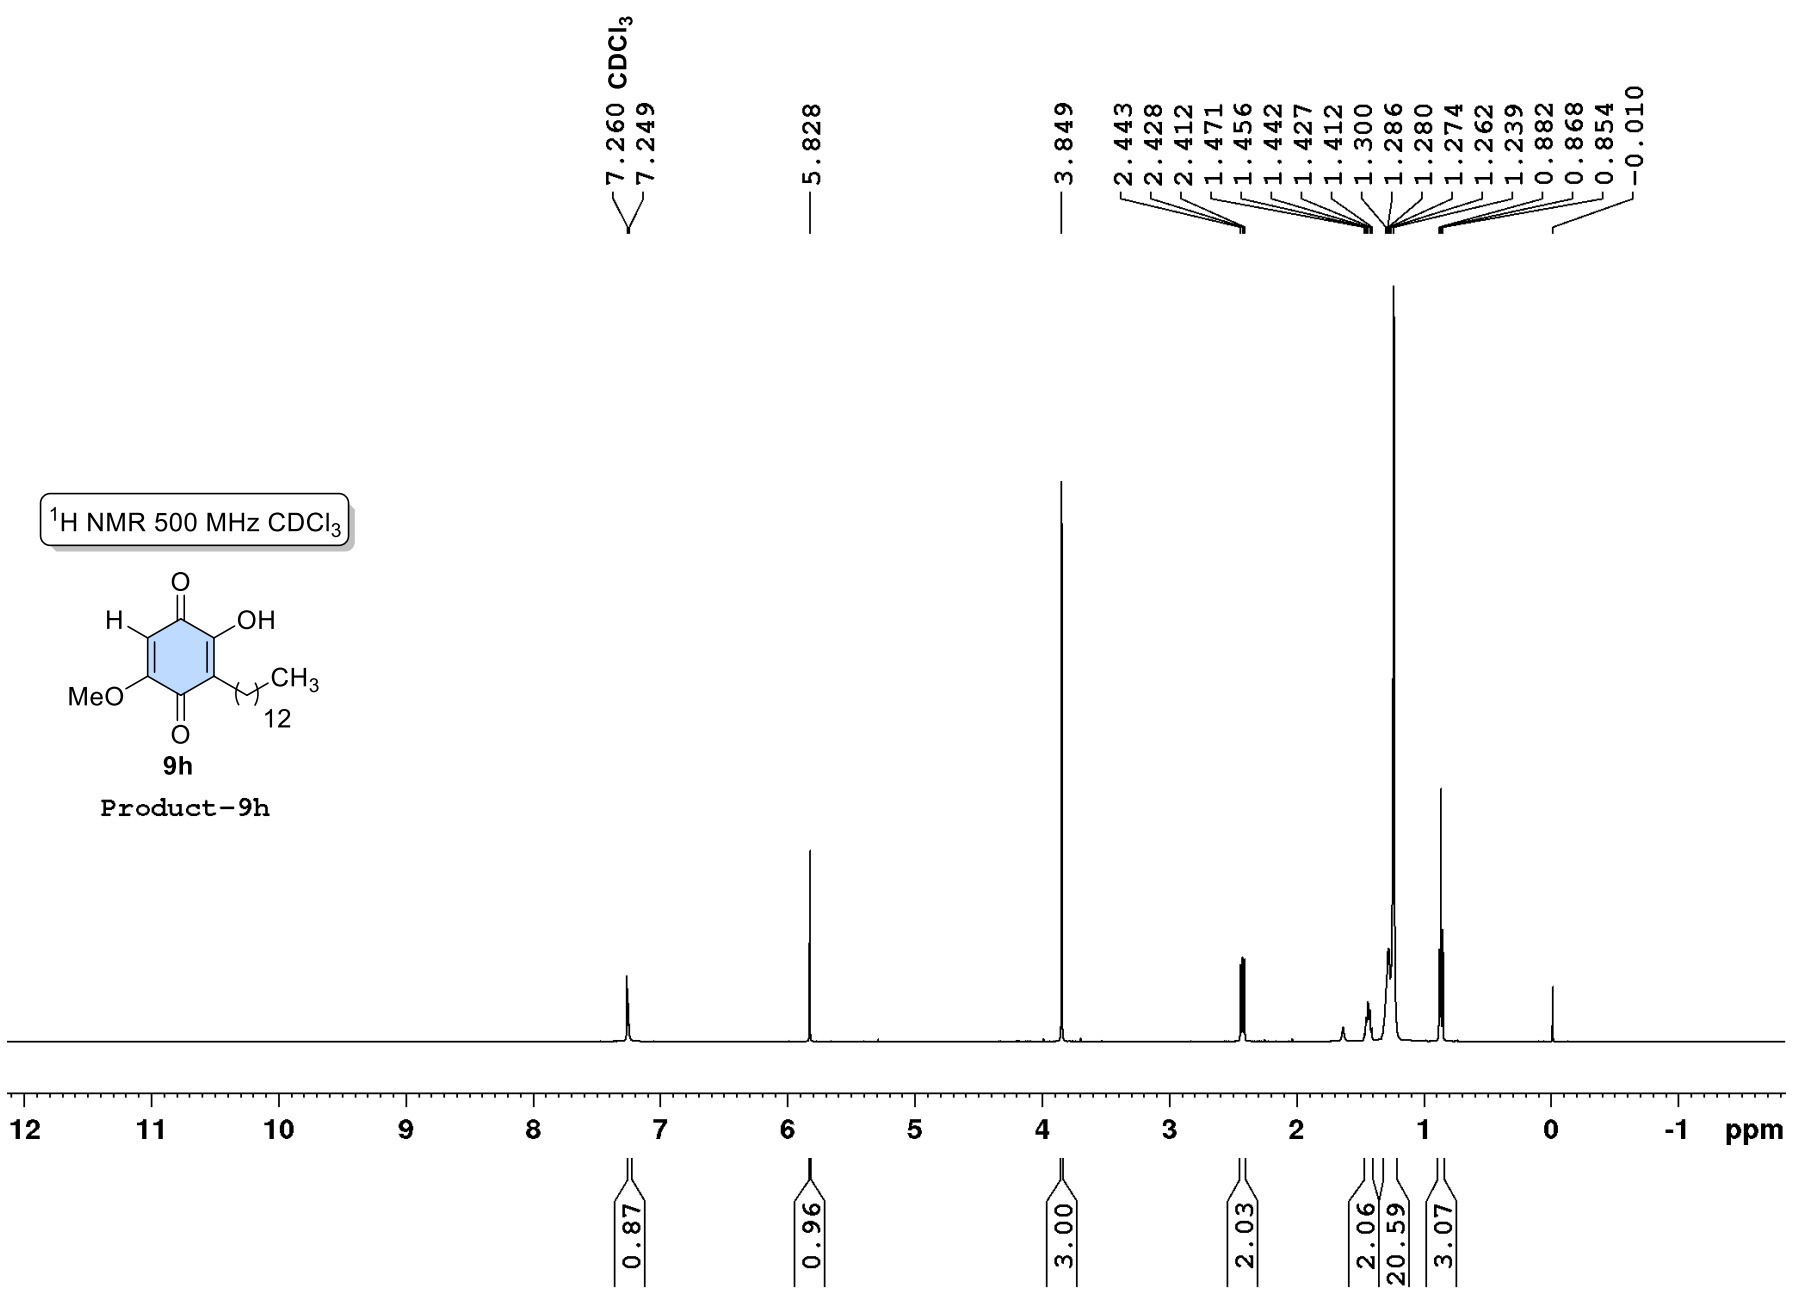

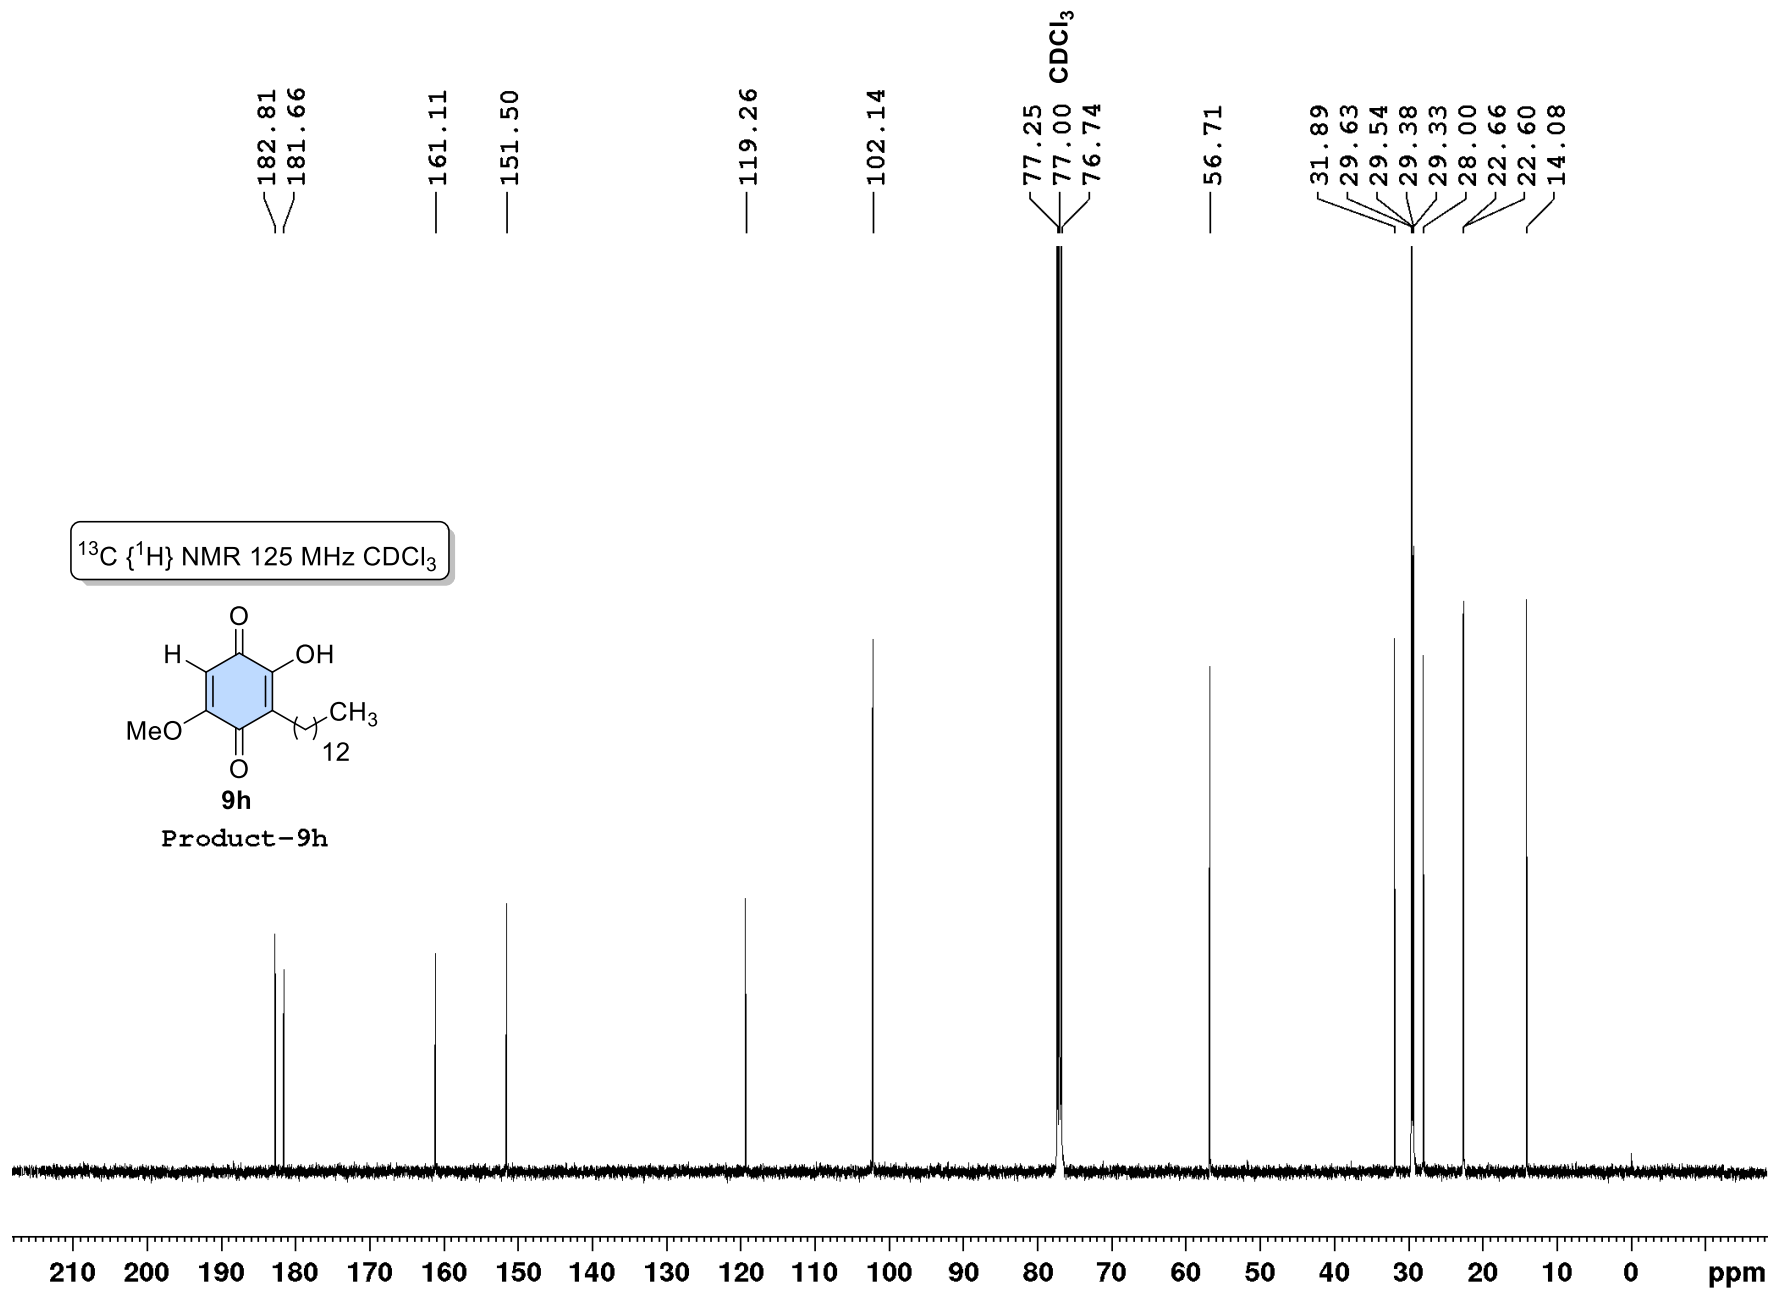

$^{13}\text{C} \{^1\text{H}\}$  NMR 125 MHz  $\text{CDCl}_3$

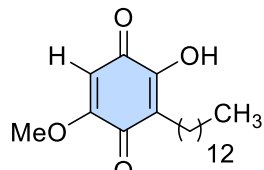

**9h**  
Product-9h

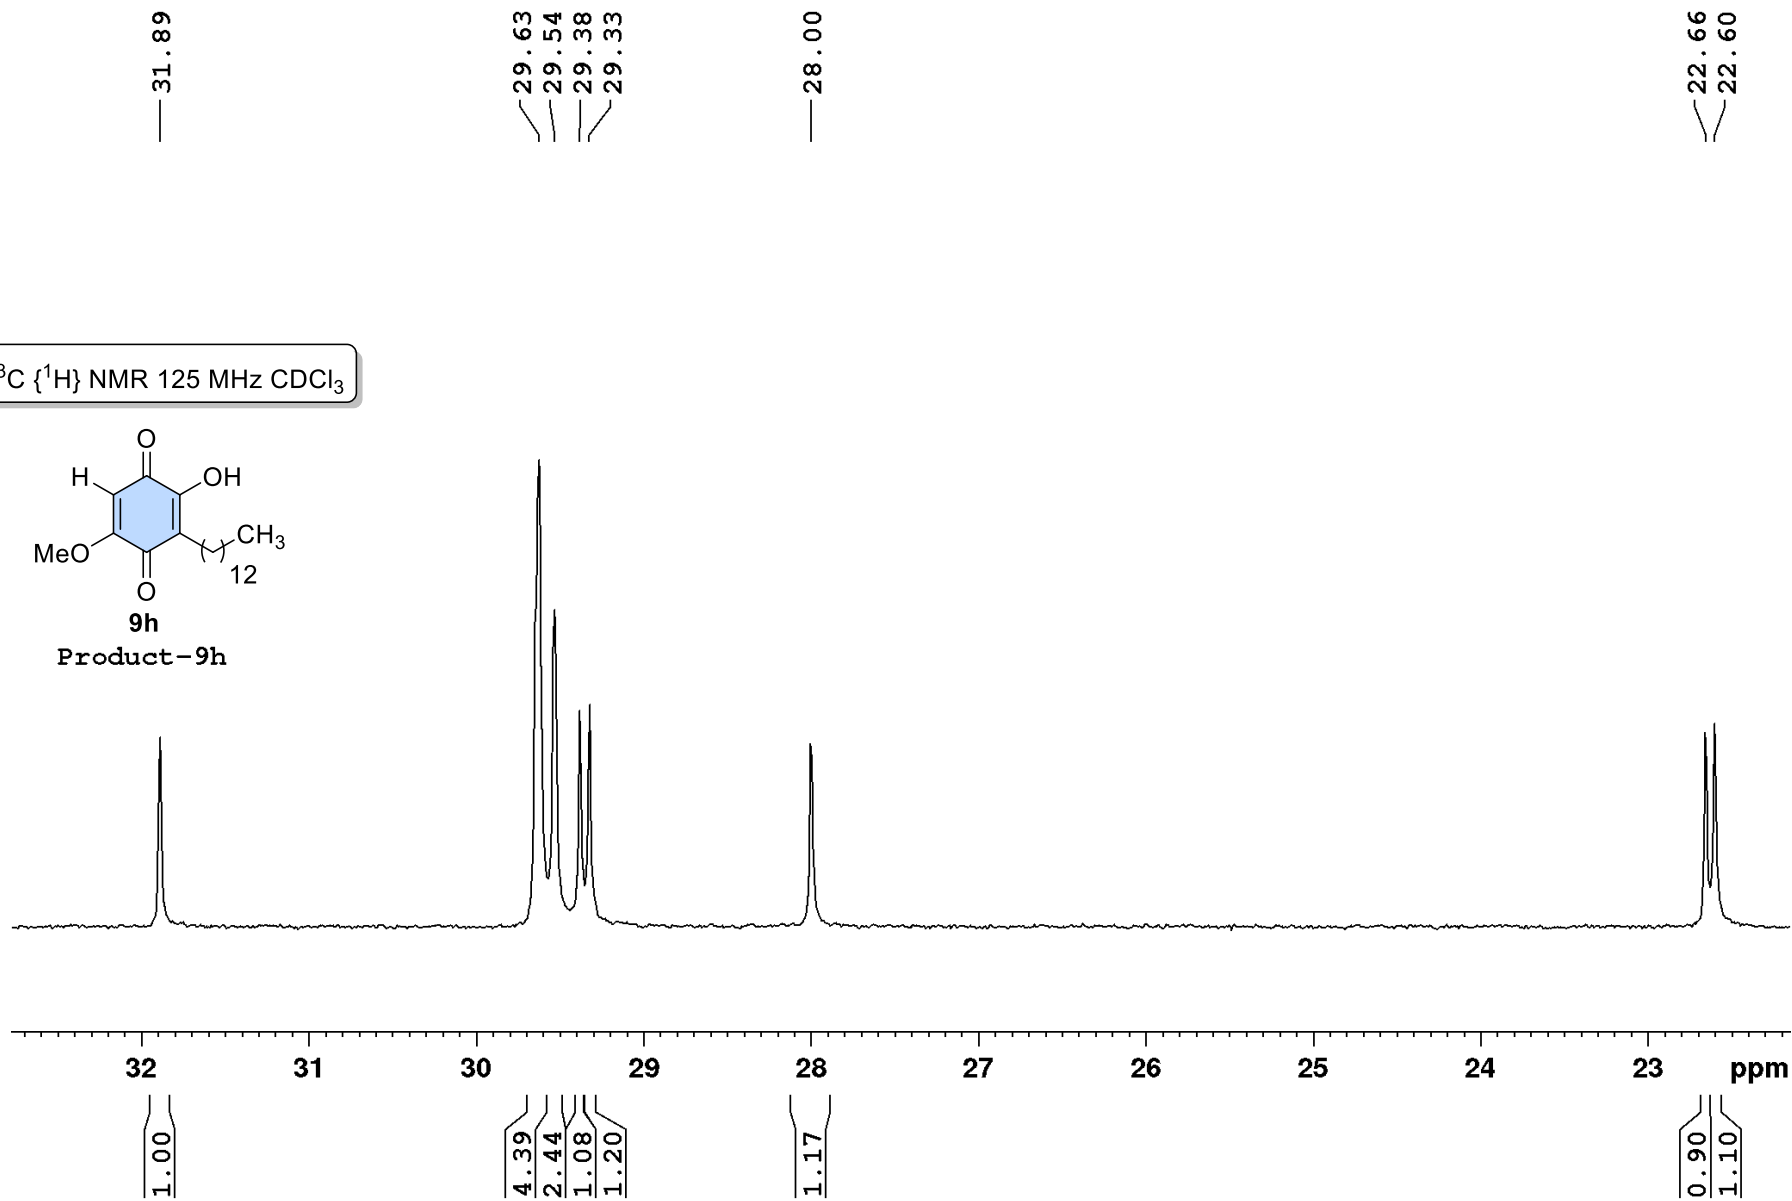

DEPT-135 125 MHz CDCl<sub>3</sub>

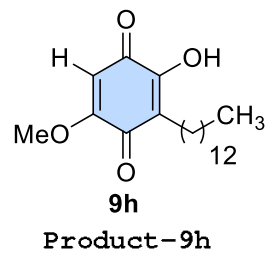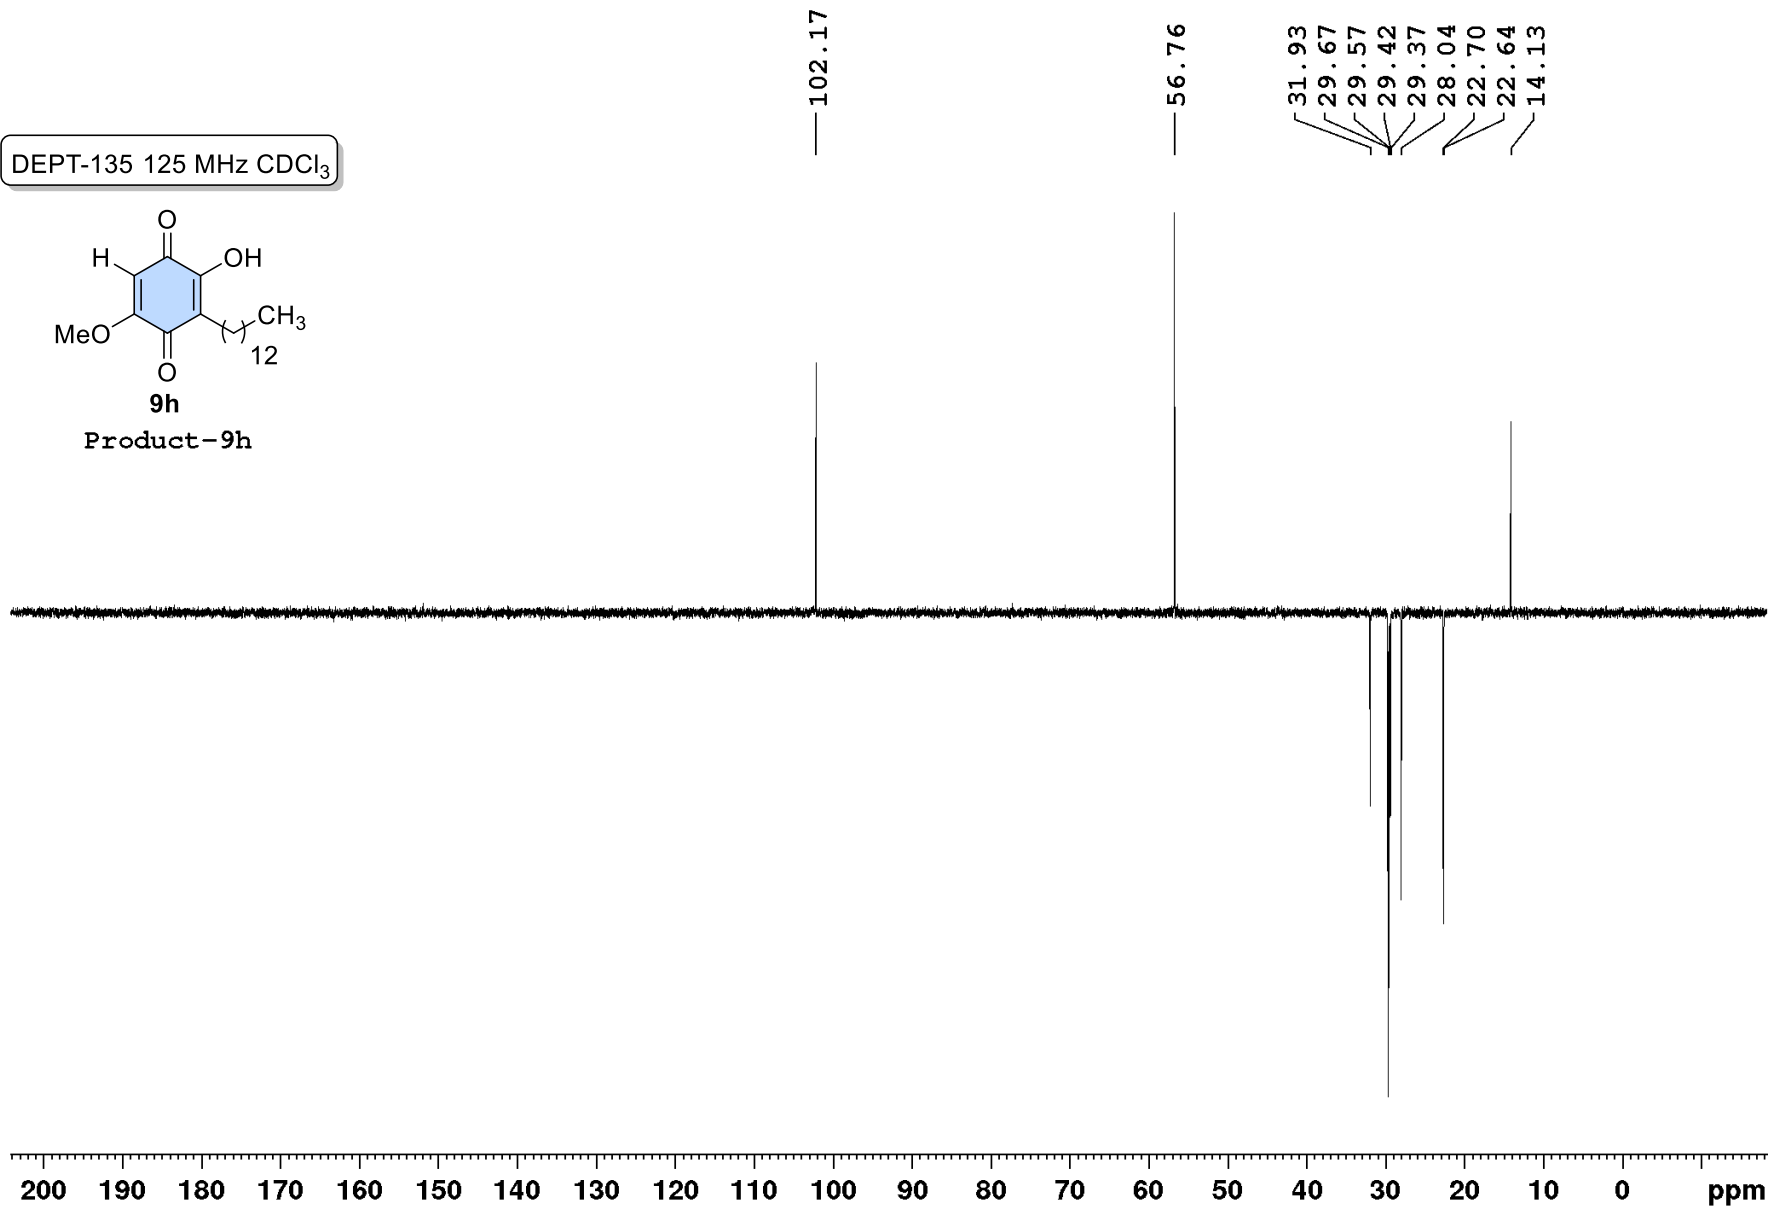

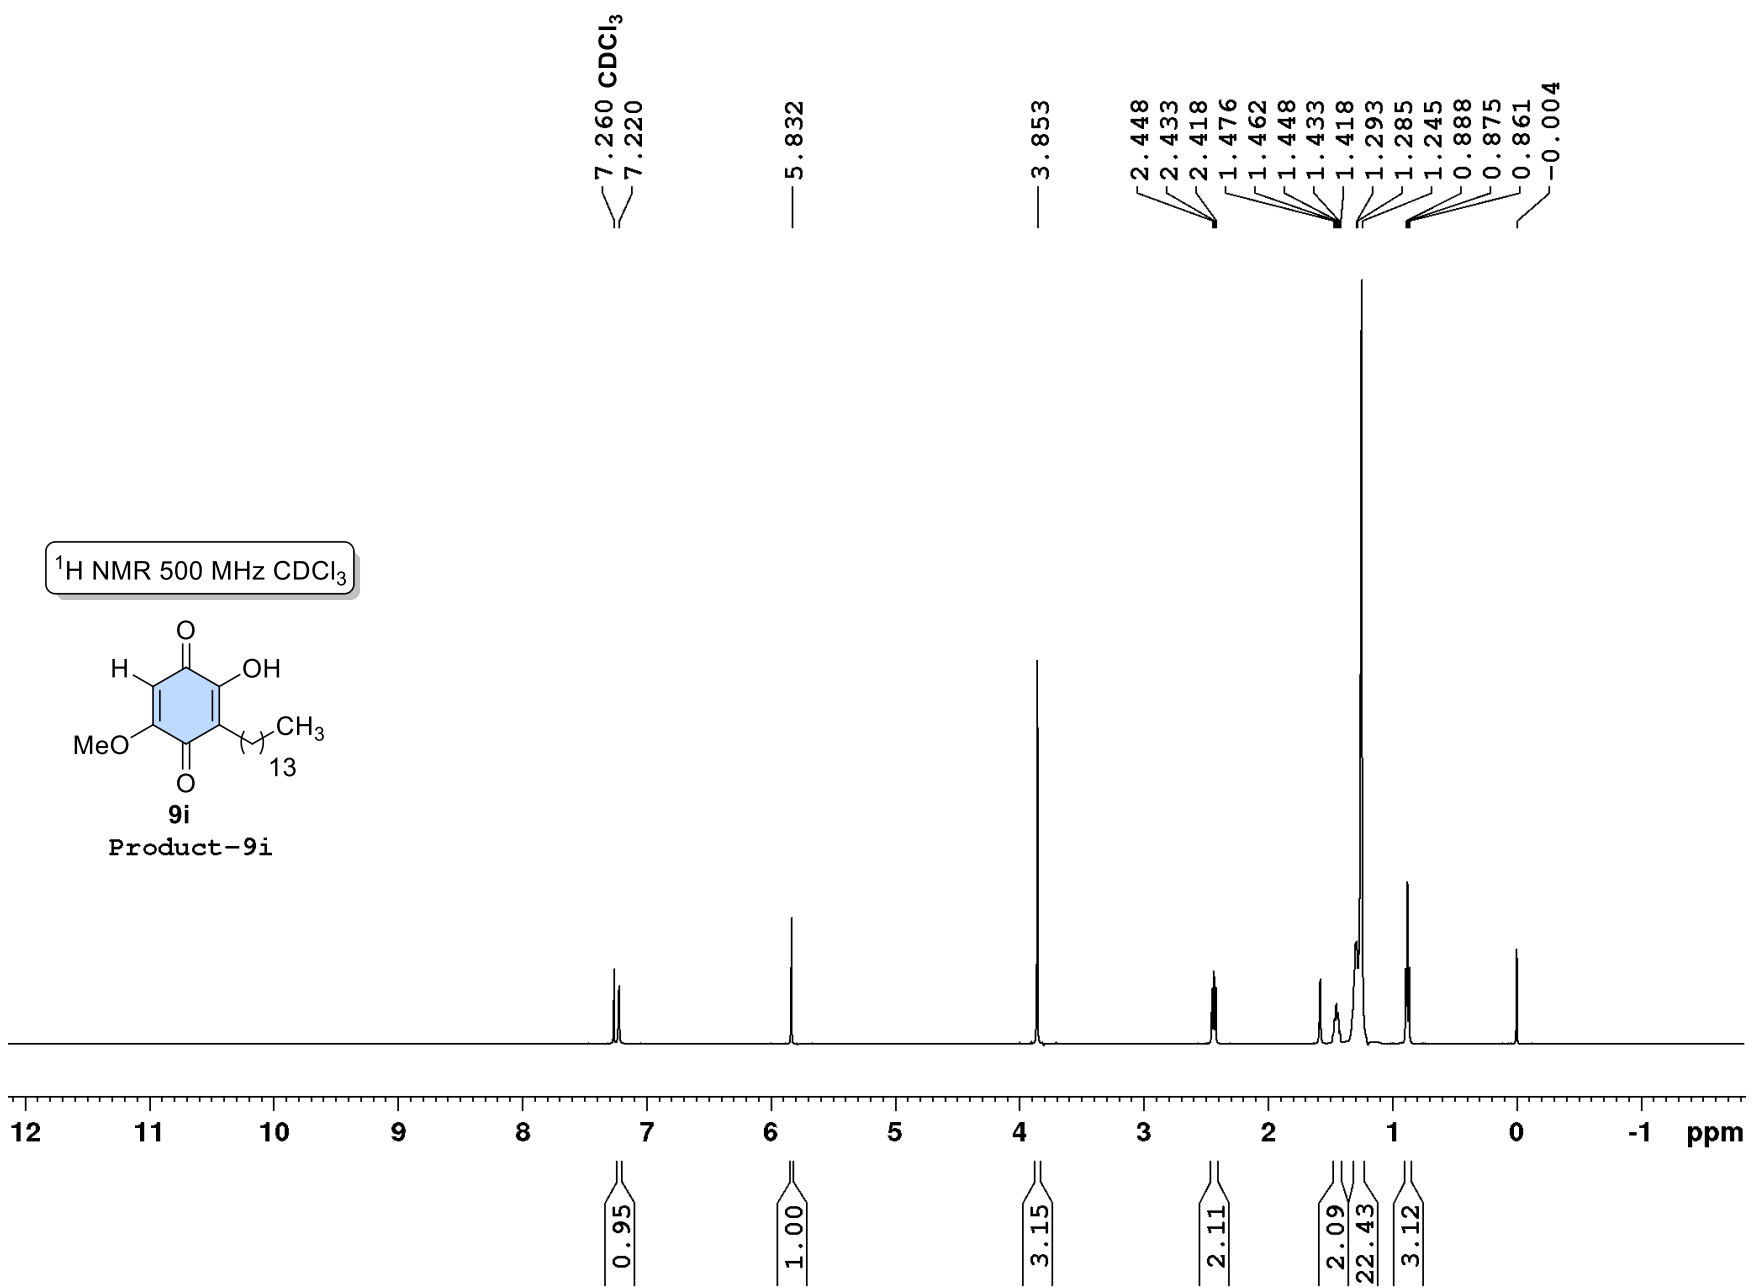

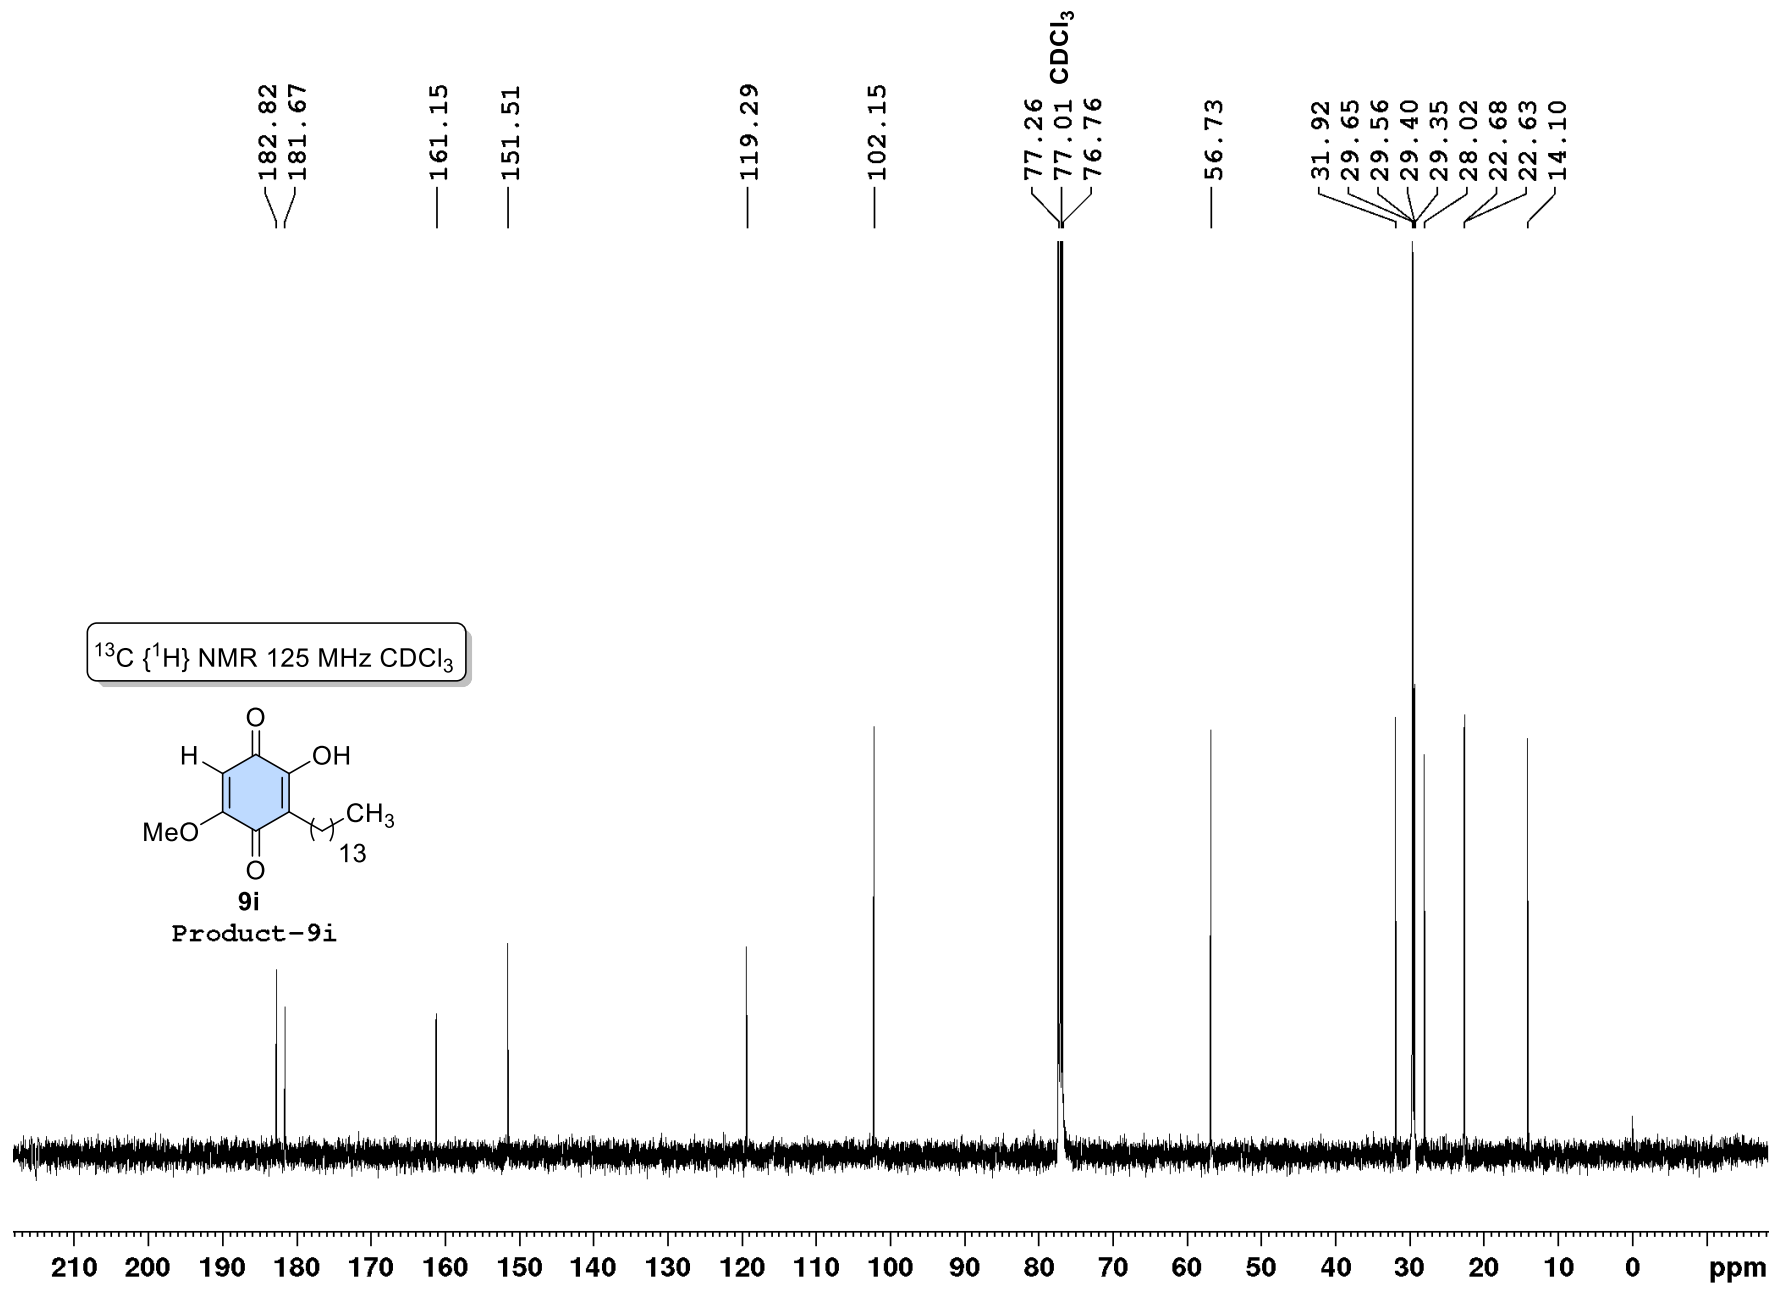



$^{13}\text{C} \{^1\text{H}\}$  NMR 125 MHz  $\text{CDCl}_3$

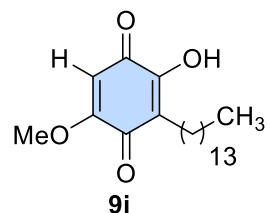

Product-9i

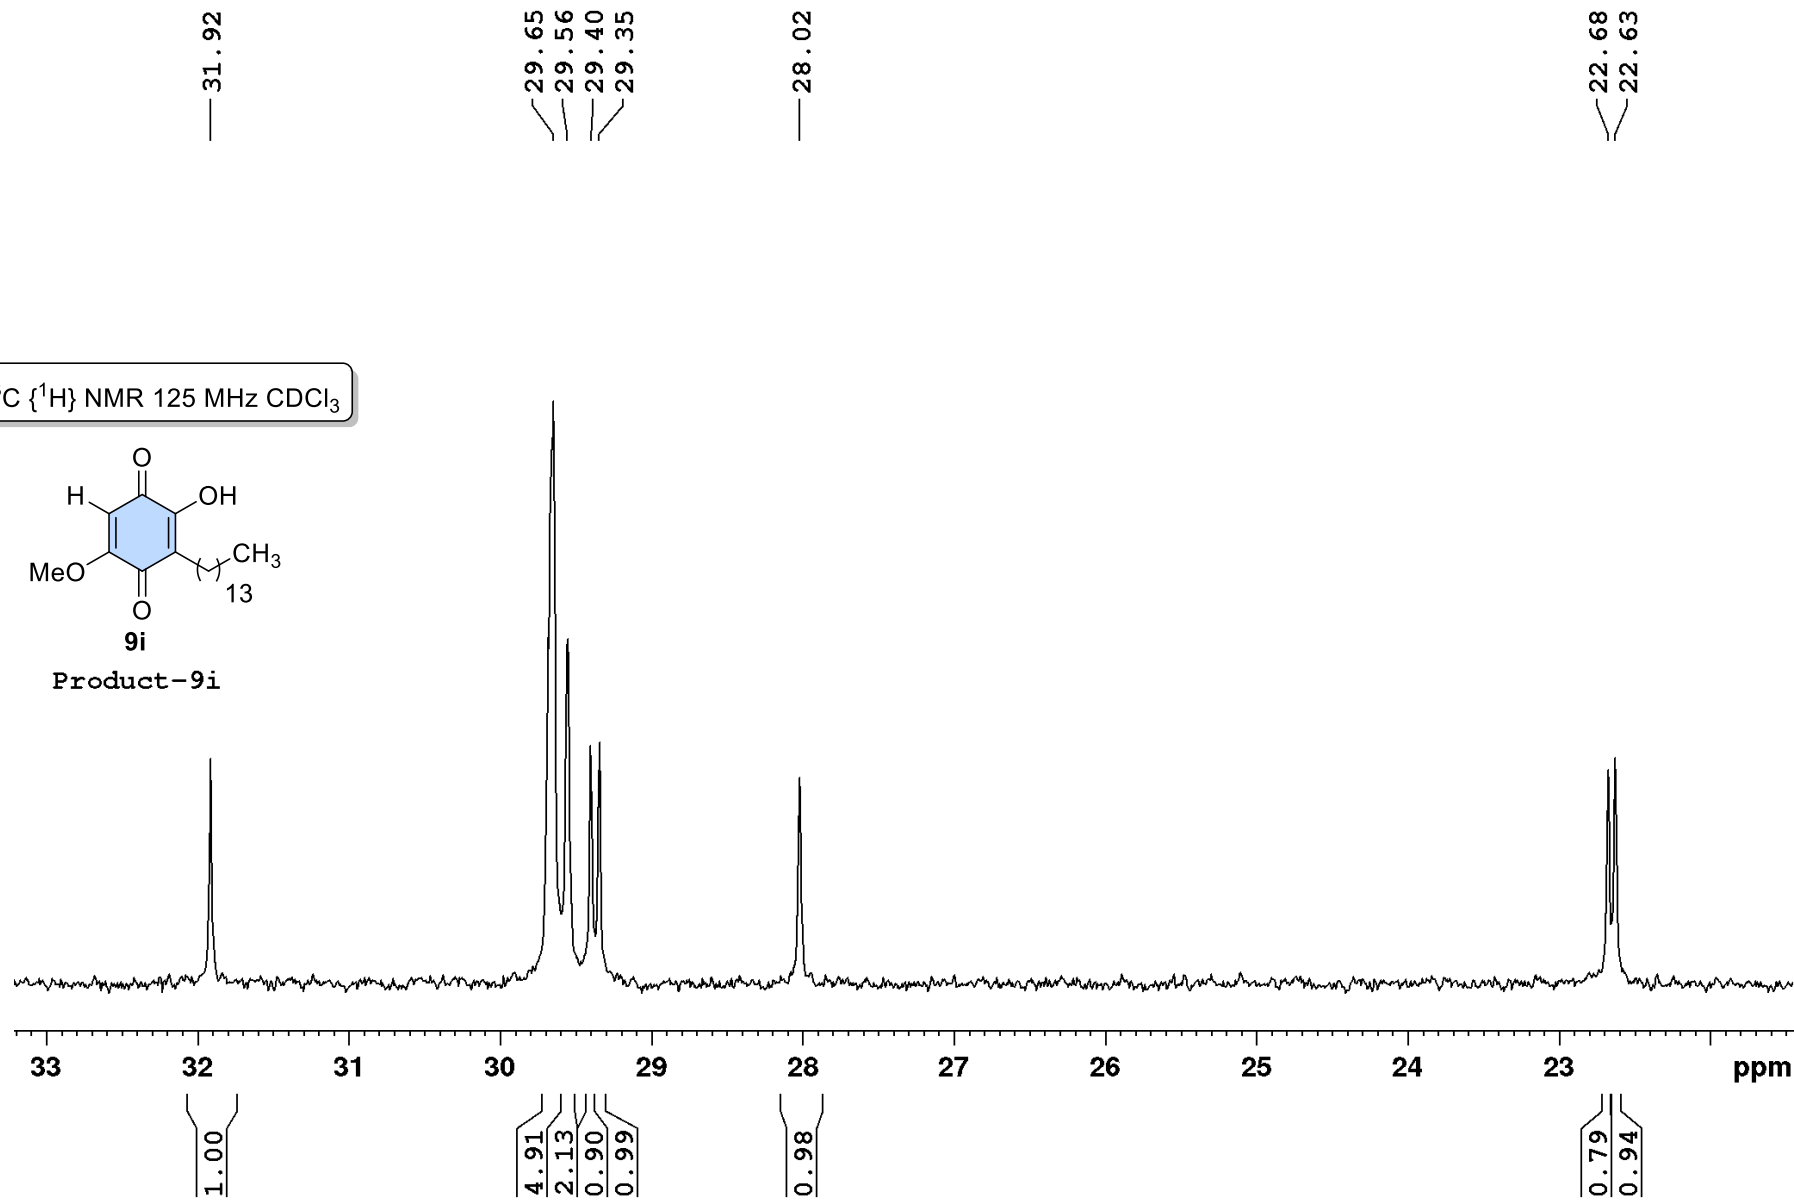

DEPT-135 125 MHz CDCl<sub>3</sub>

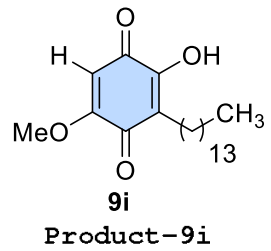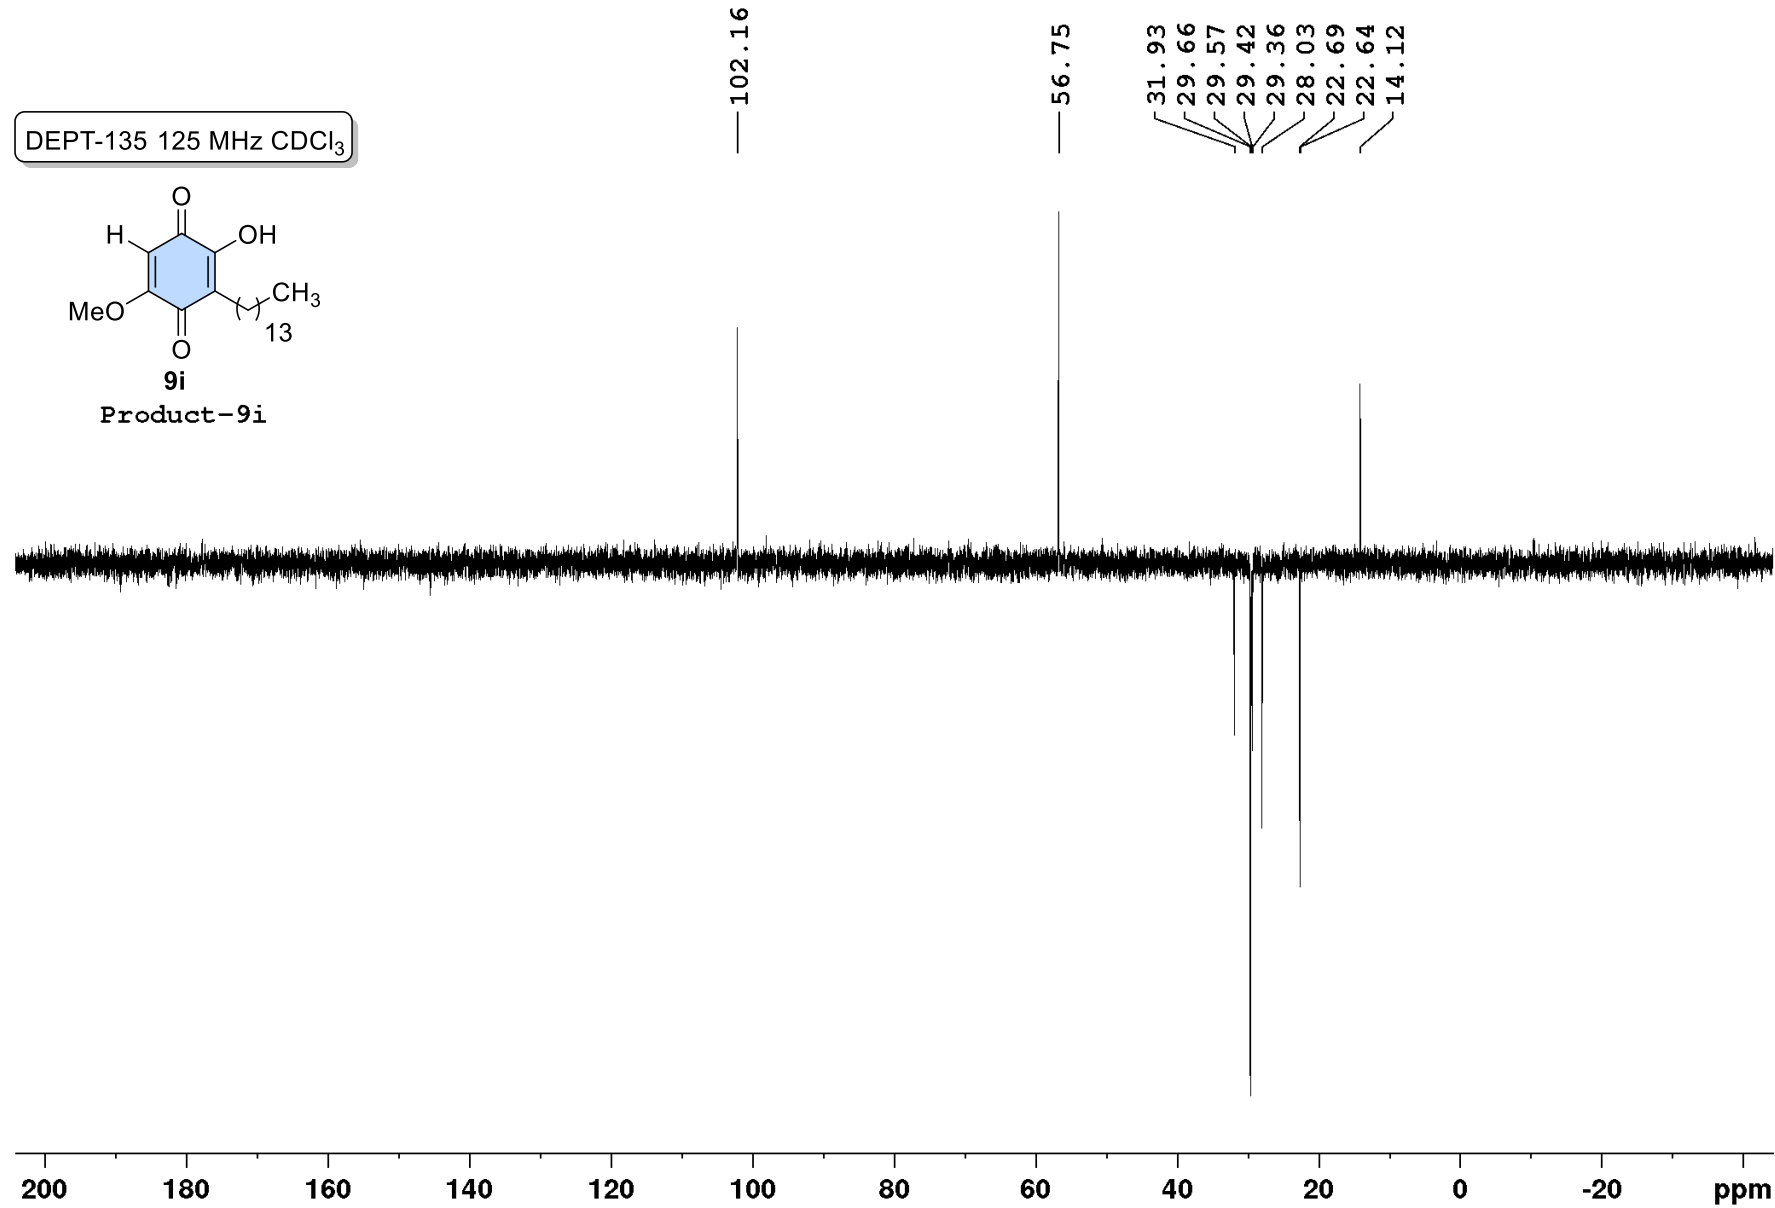

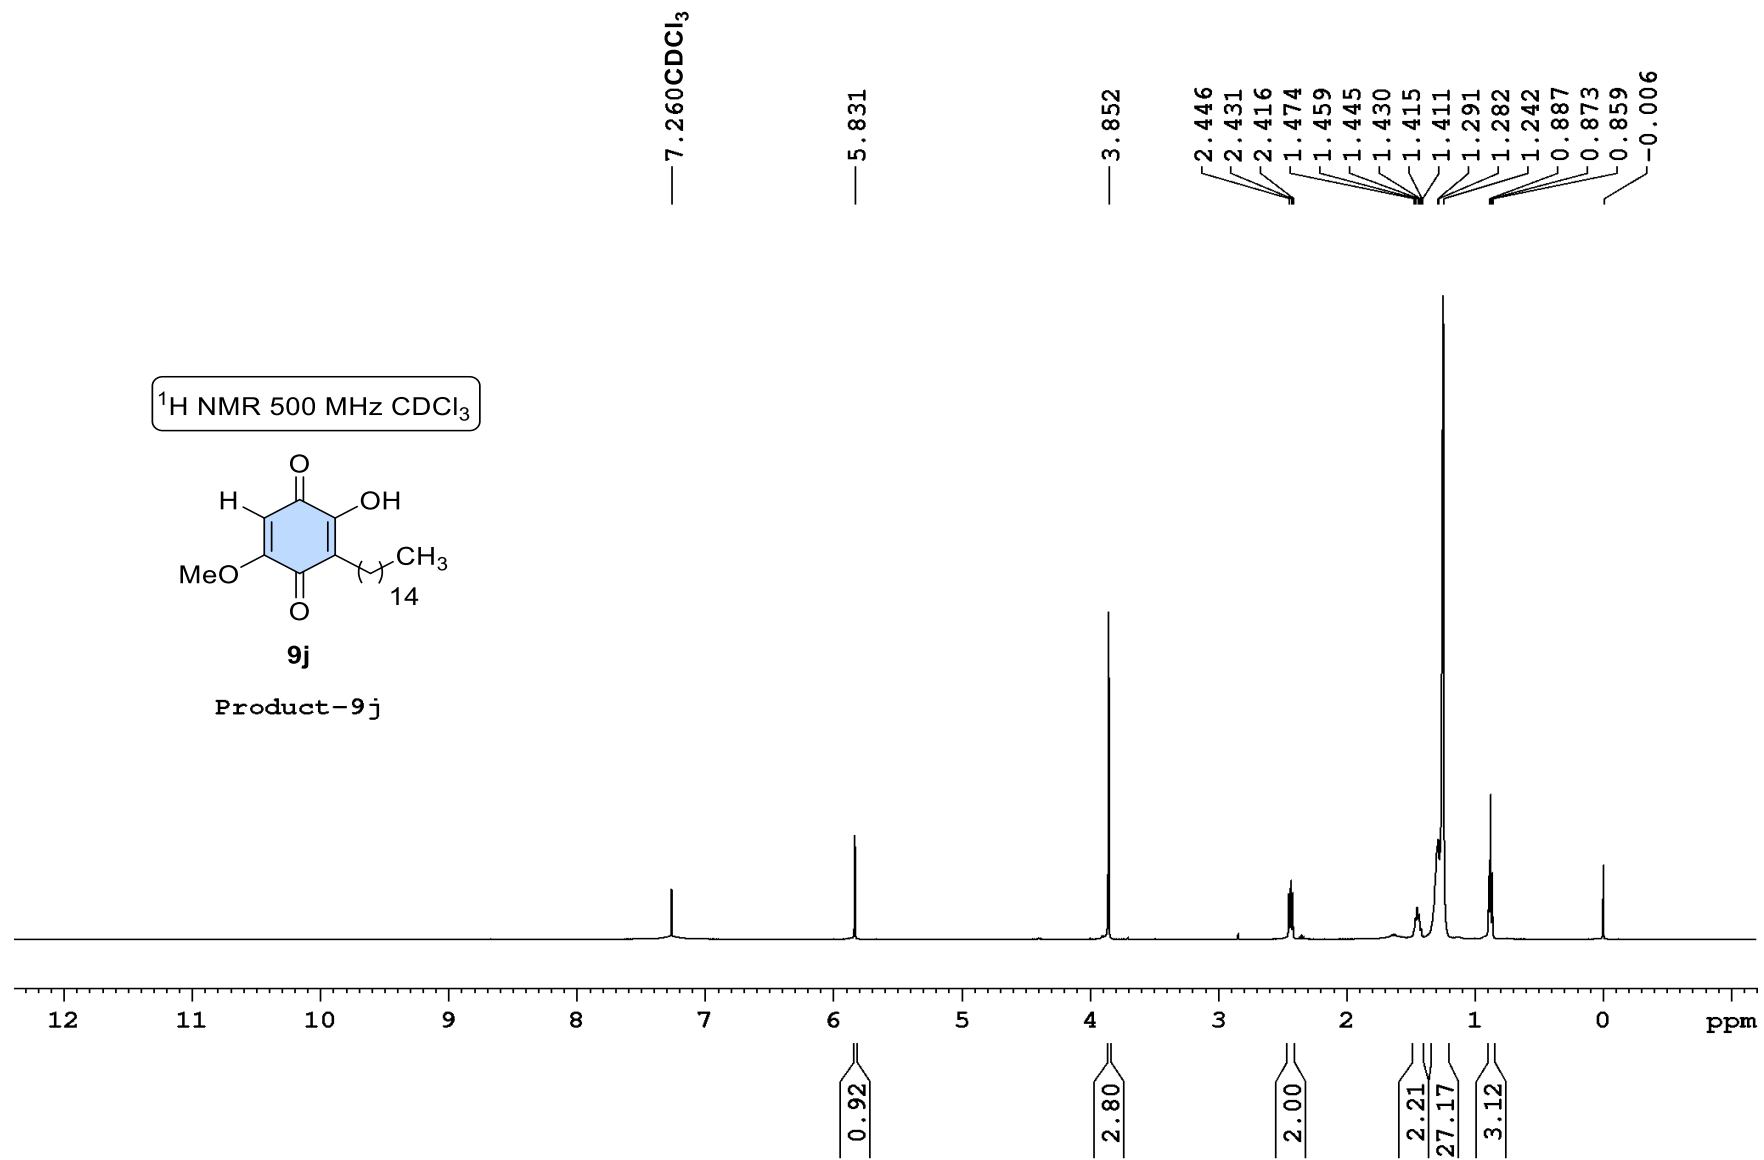

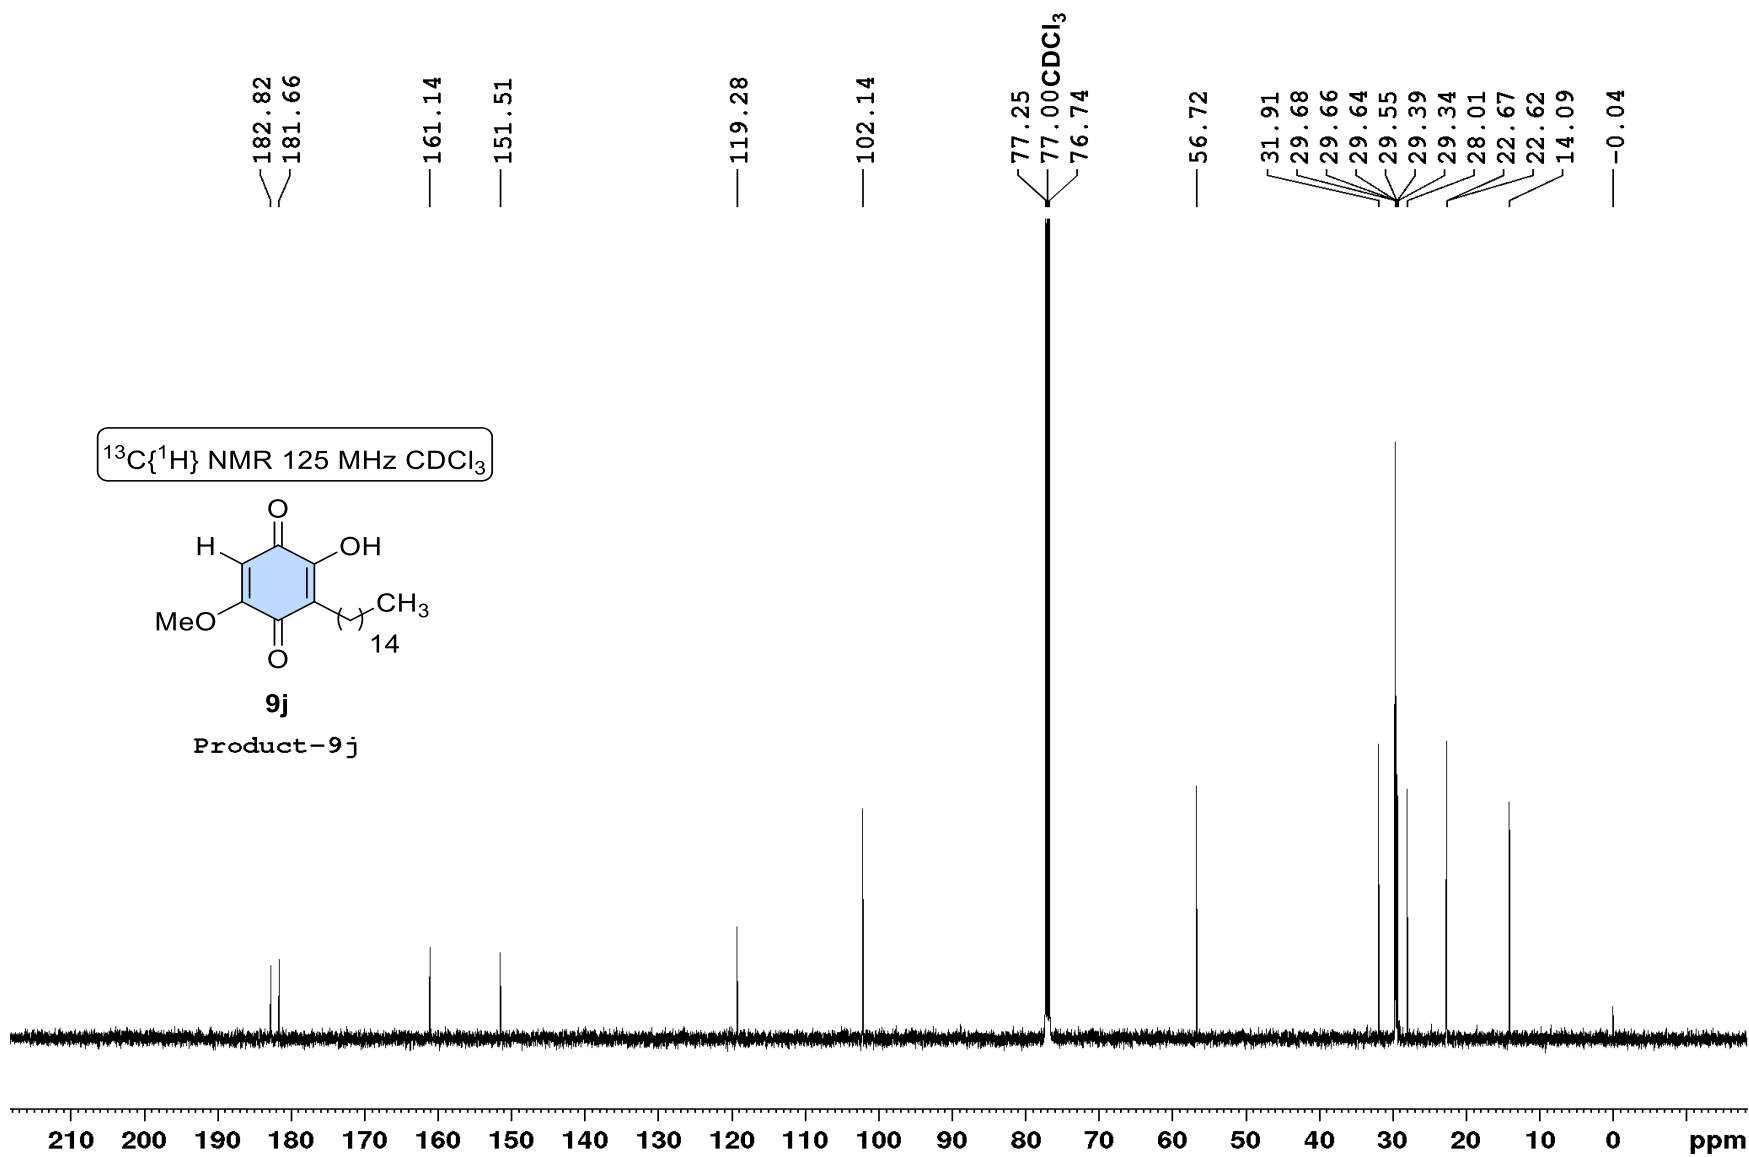

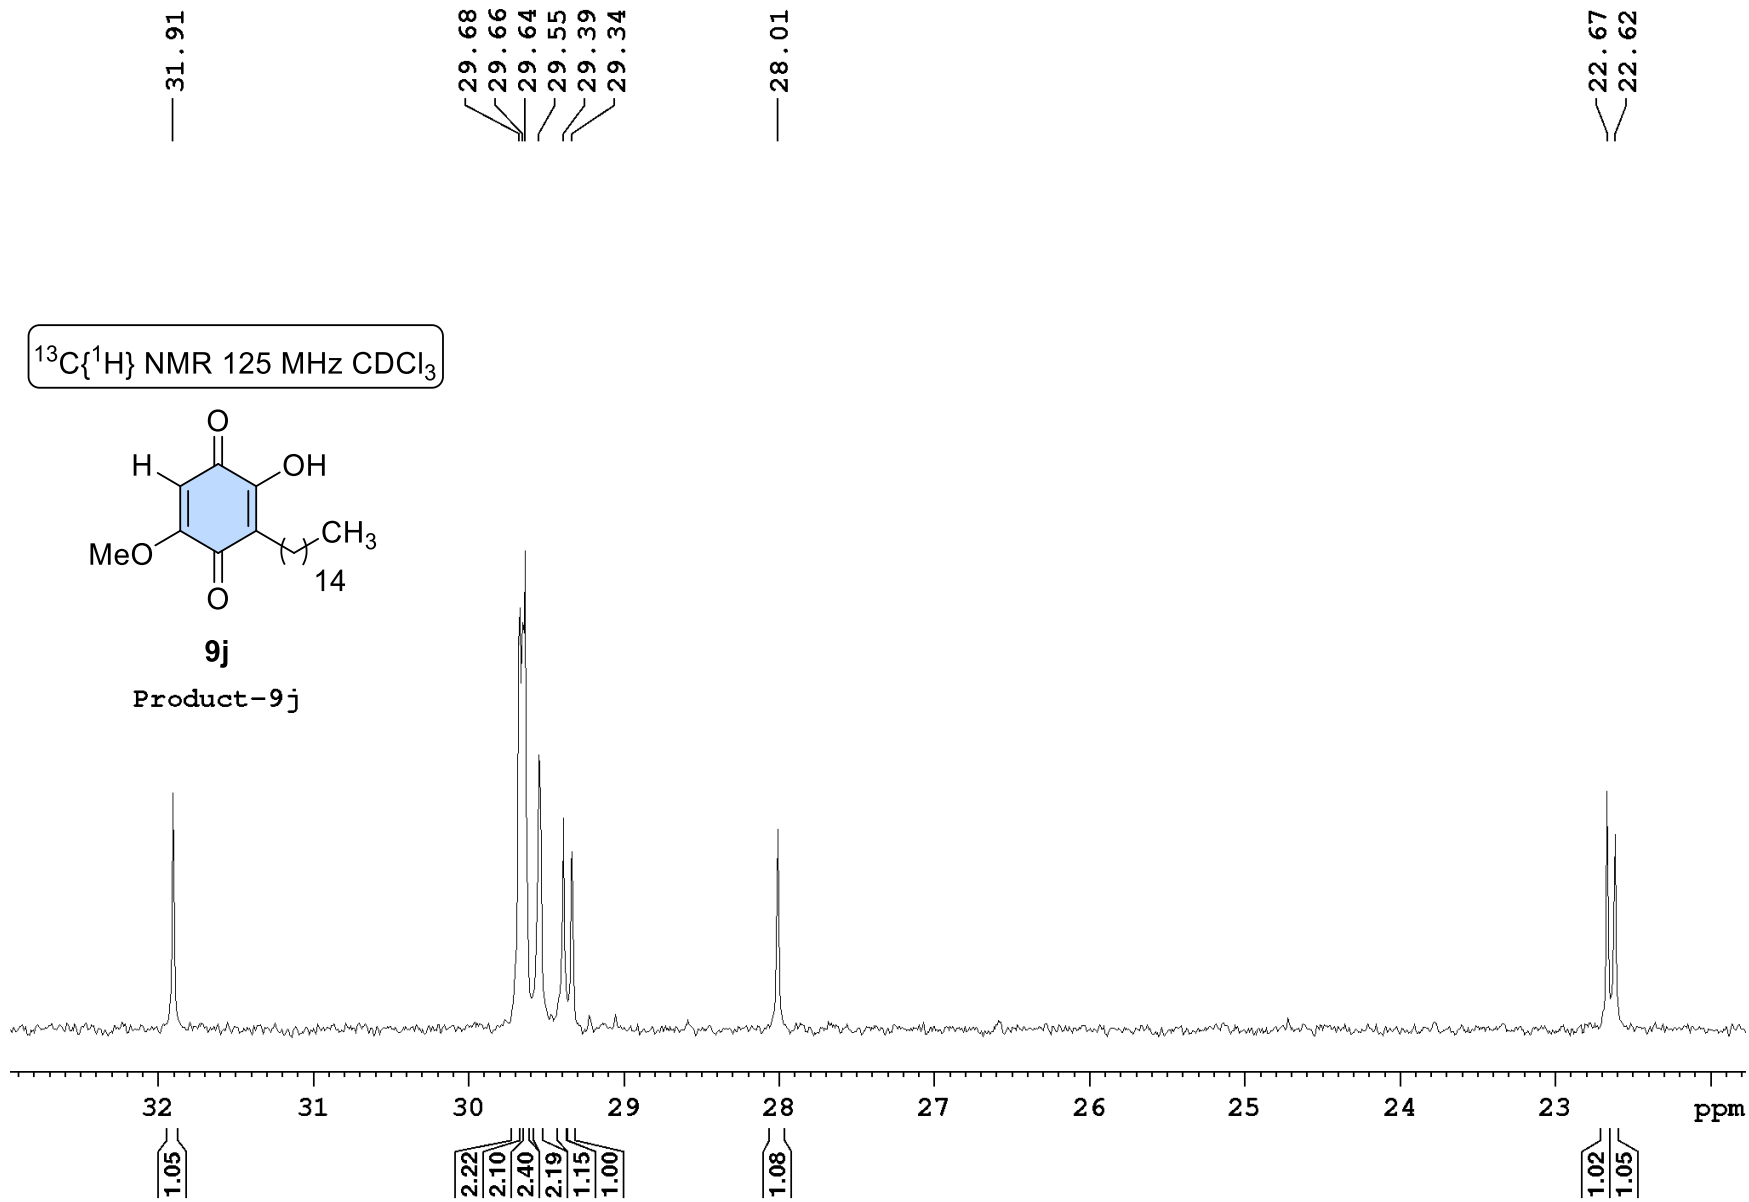

DEPT-135 125 MHz CDCl<sub>3</sub>

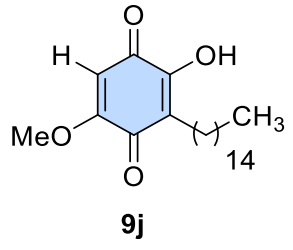

Product-9j

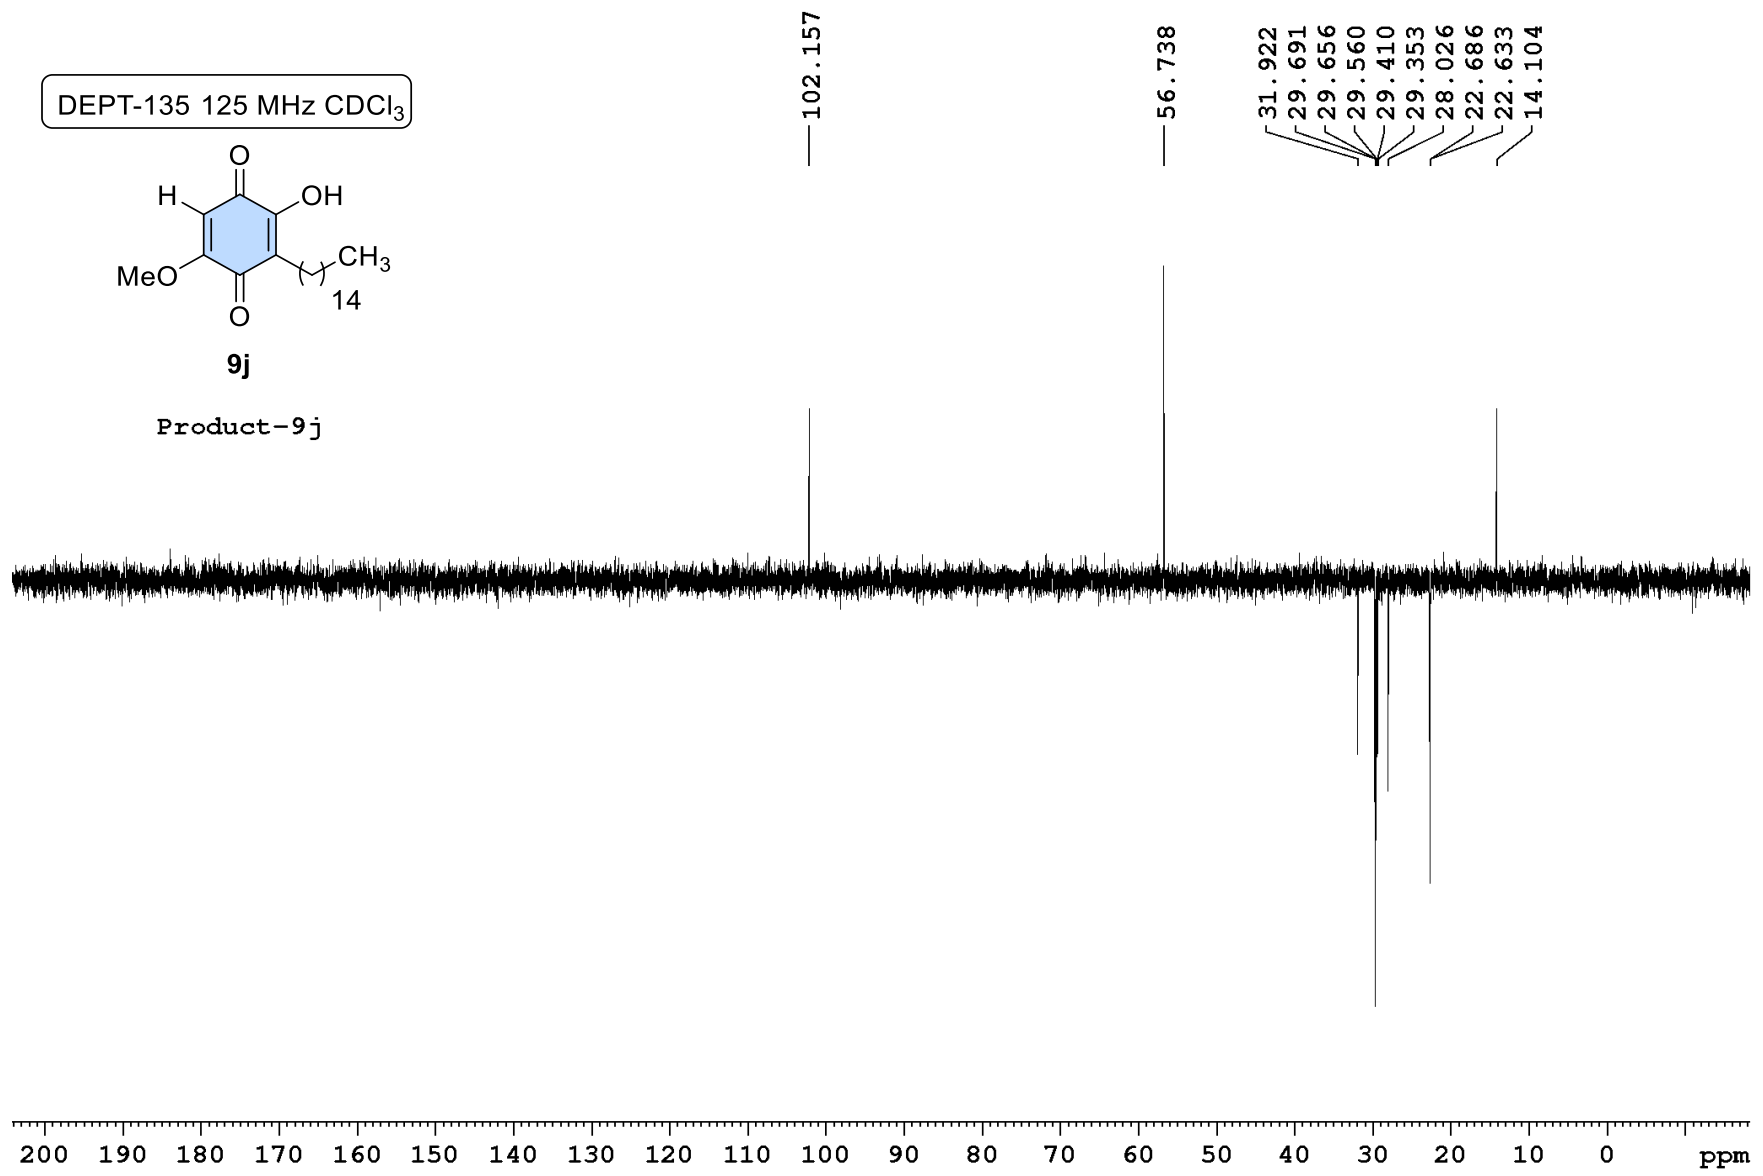

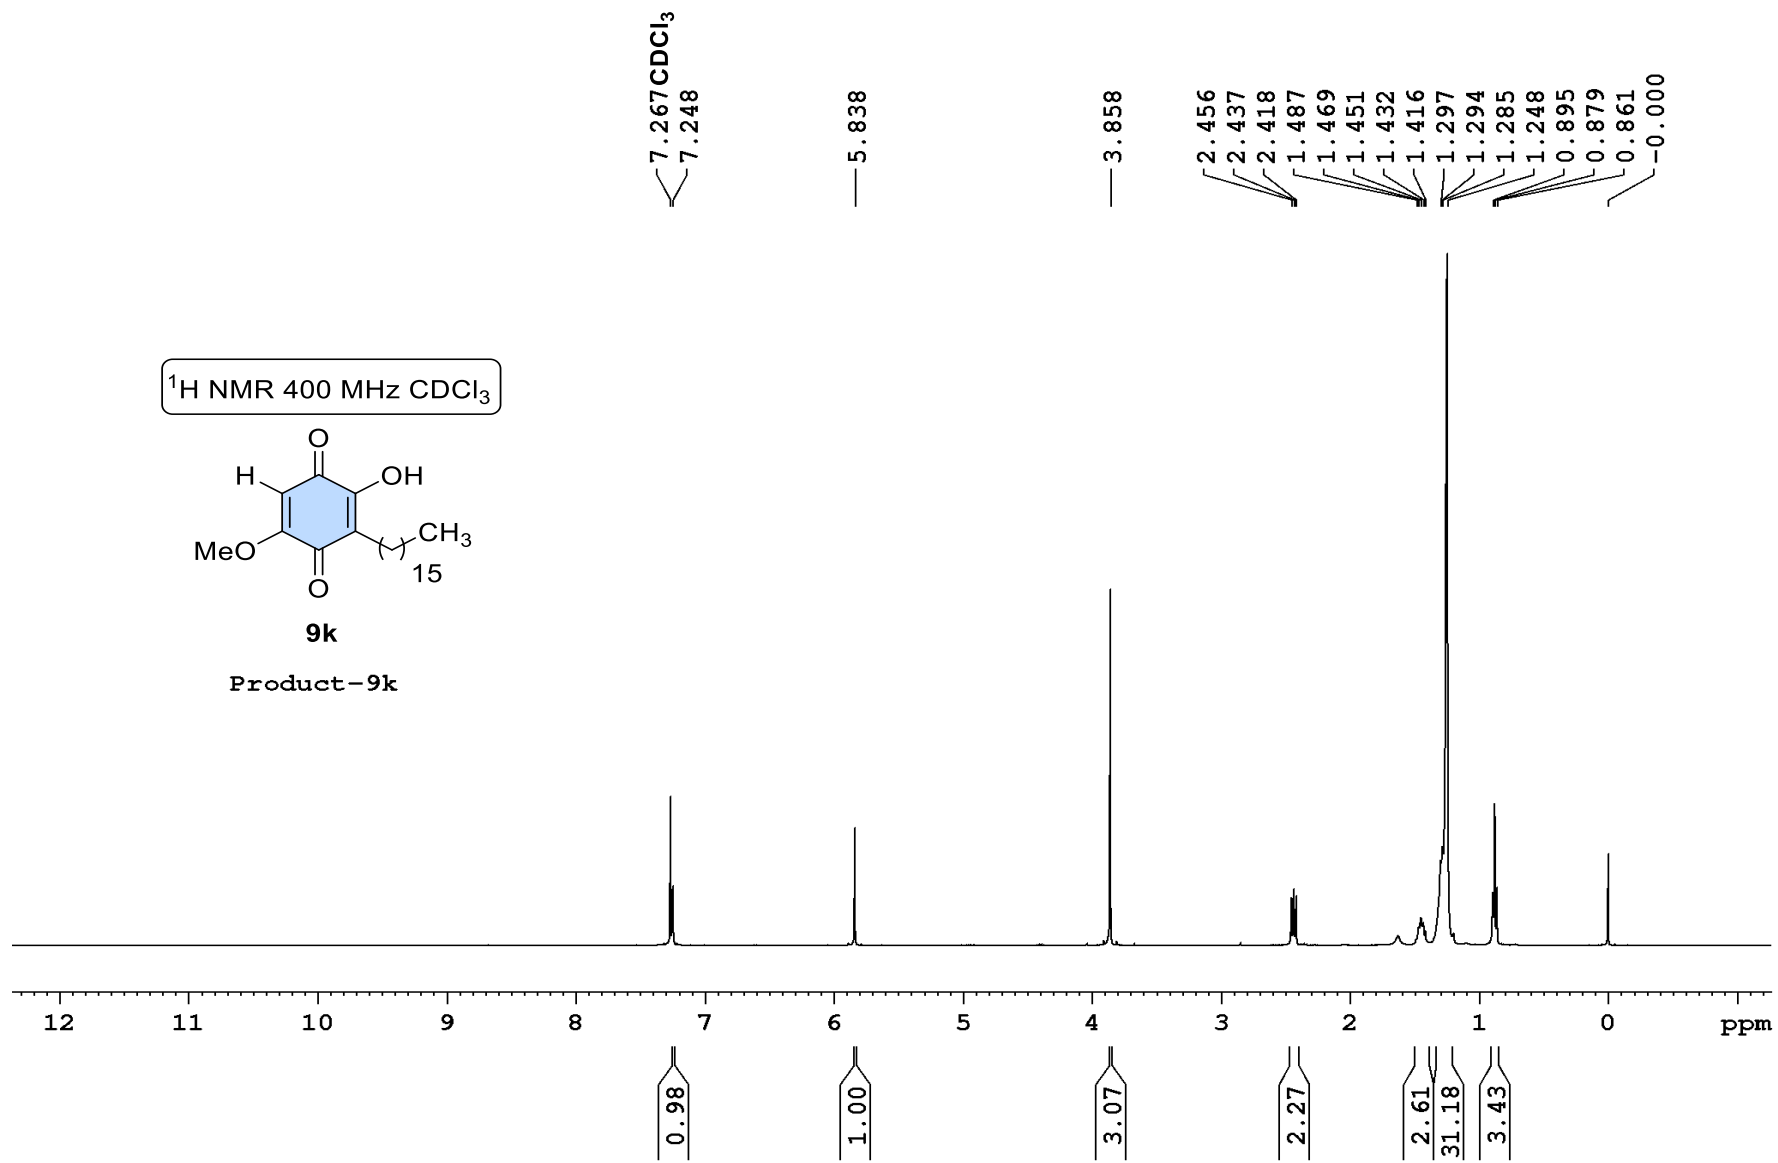

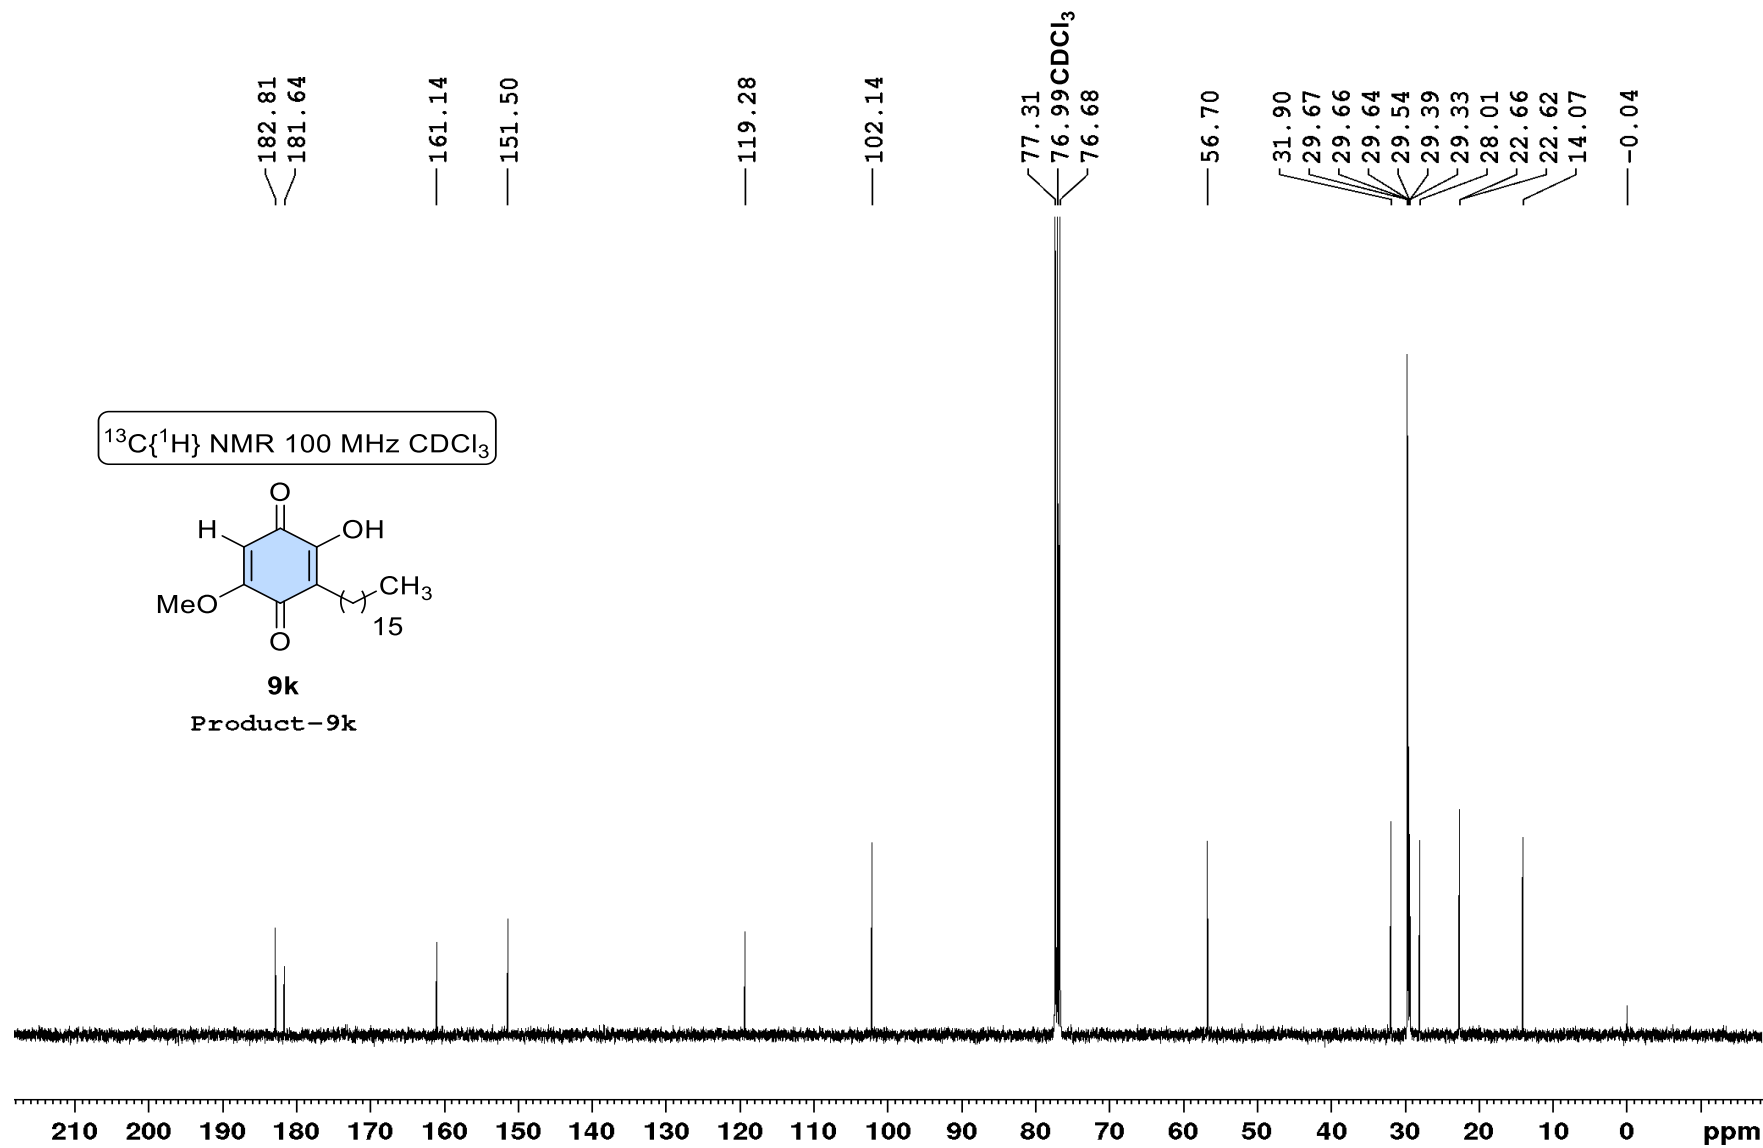



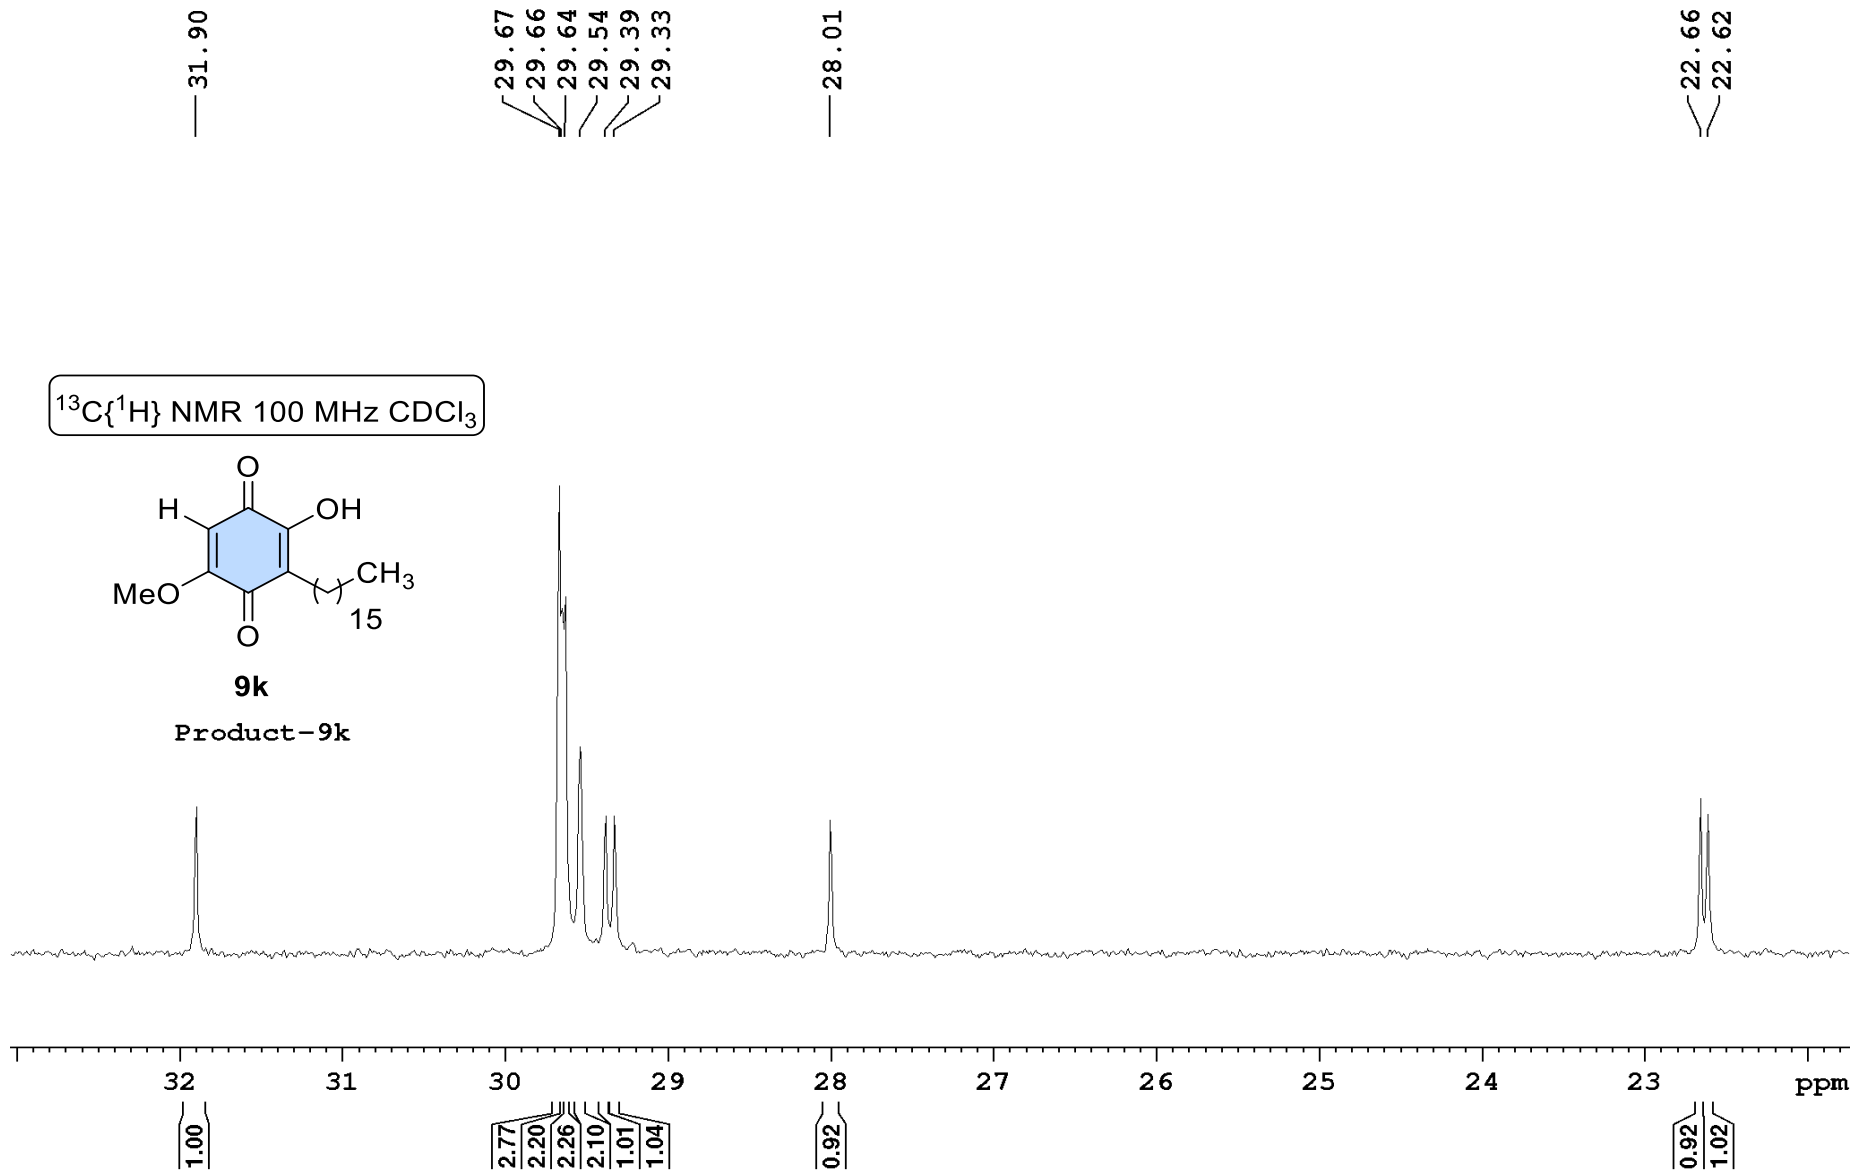

DEPT-135 100 MHz CDCl<sub>3</sub>

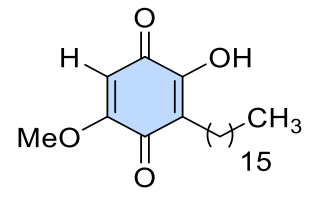

9k

product-9k

— 102.165

— 56.750

31.934  
29.705  
29.687  
29.670  
29.575  
29.422  
29.368  
28.038  
22.698  
22.640  
14.120

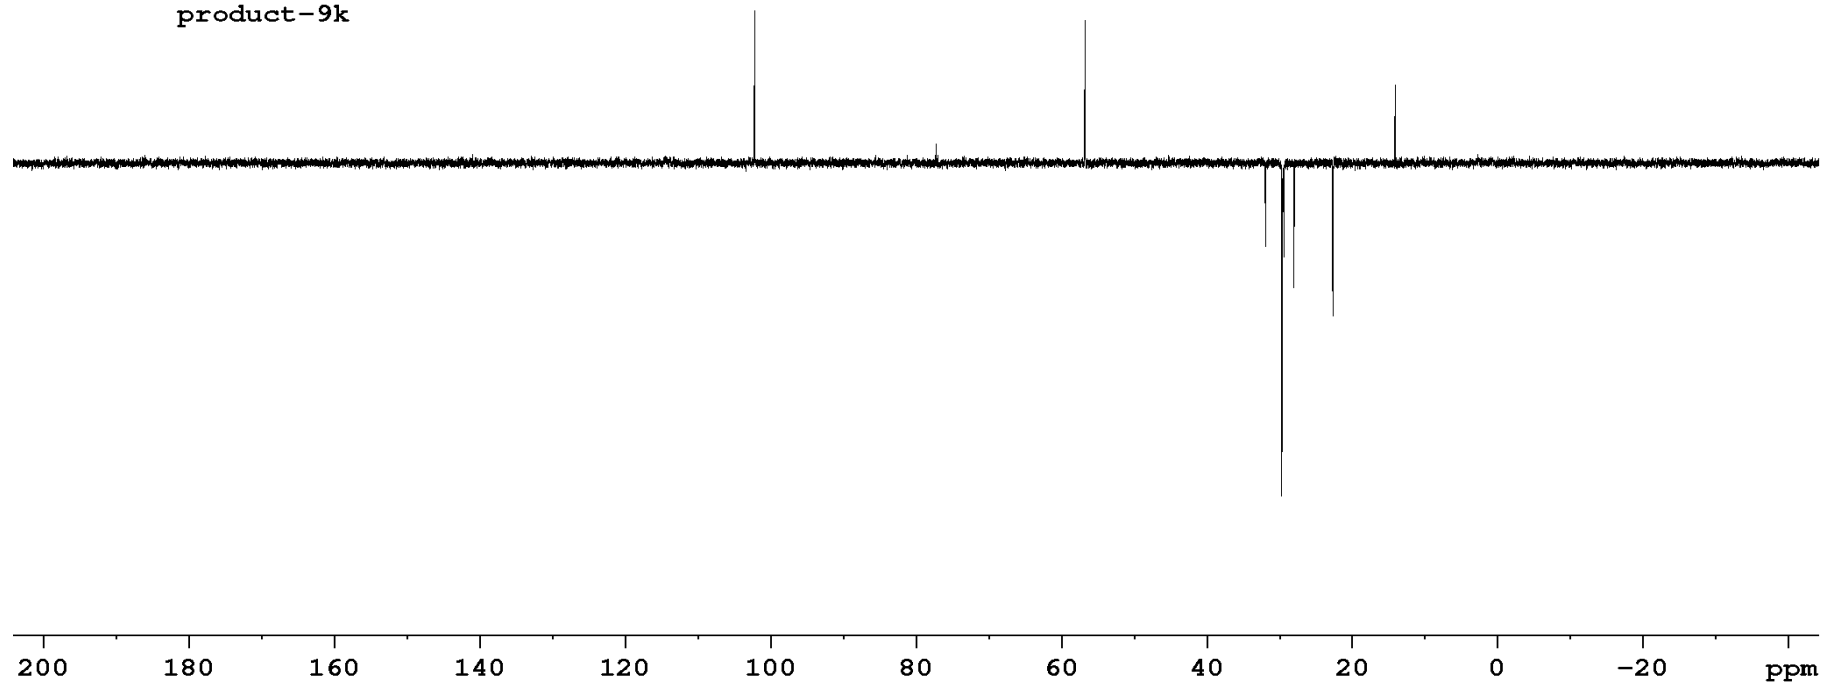

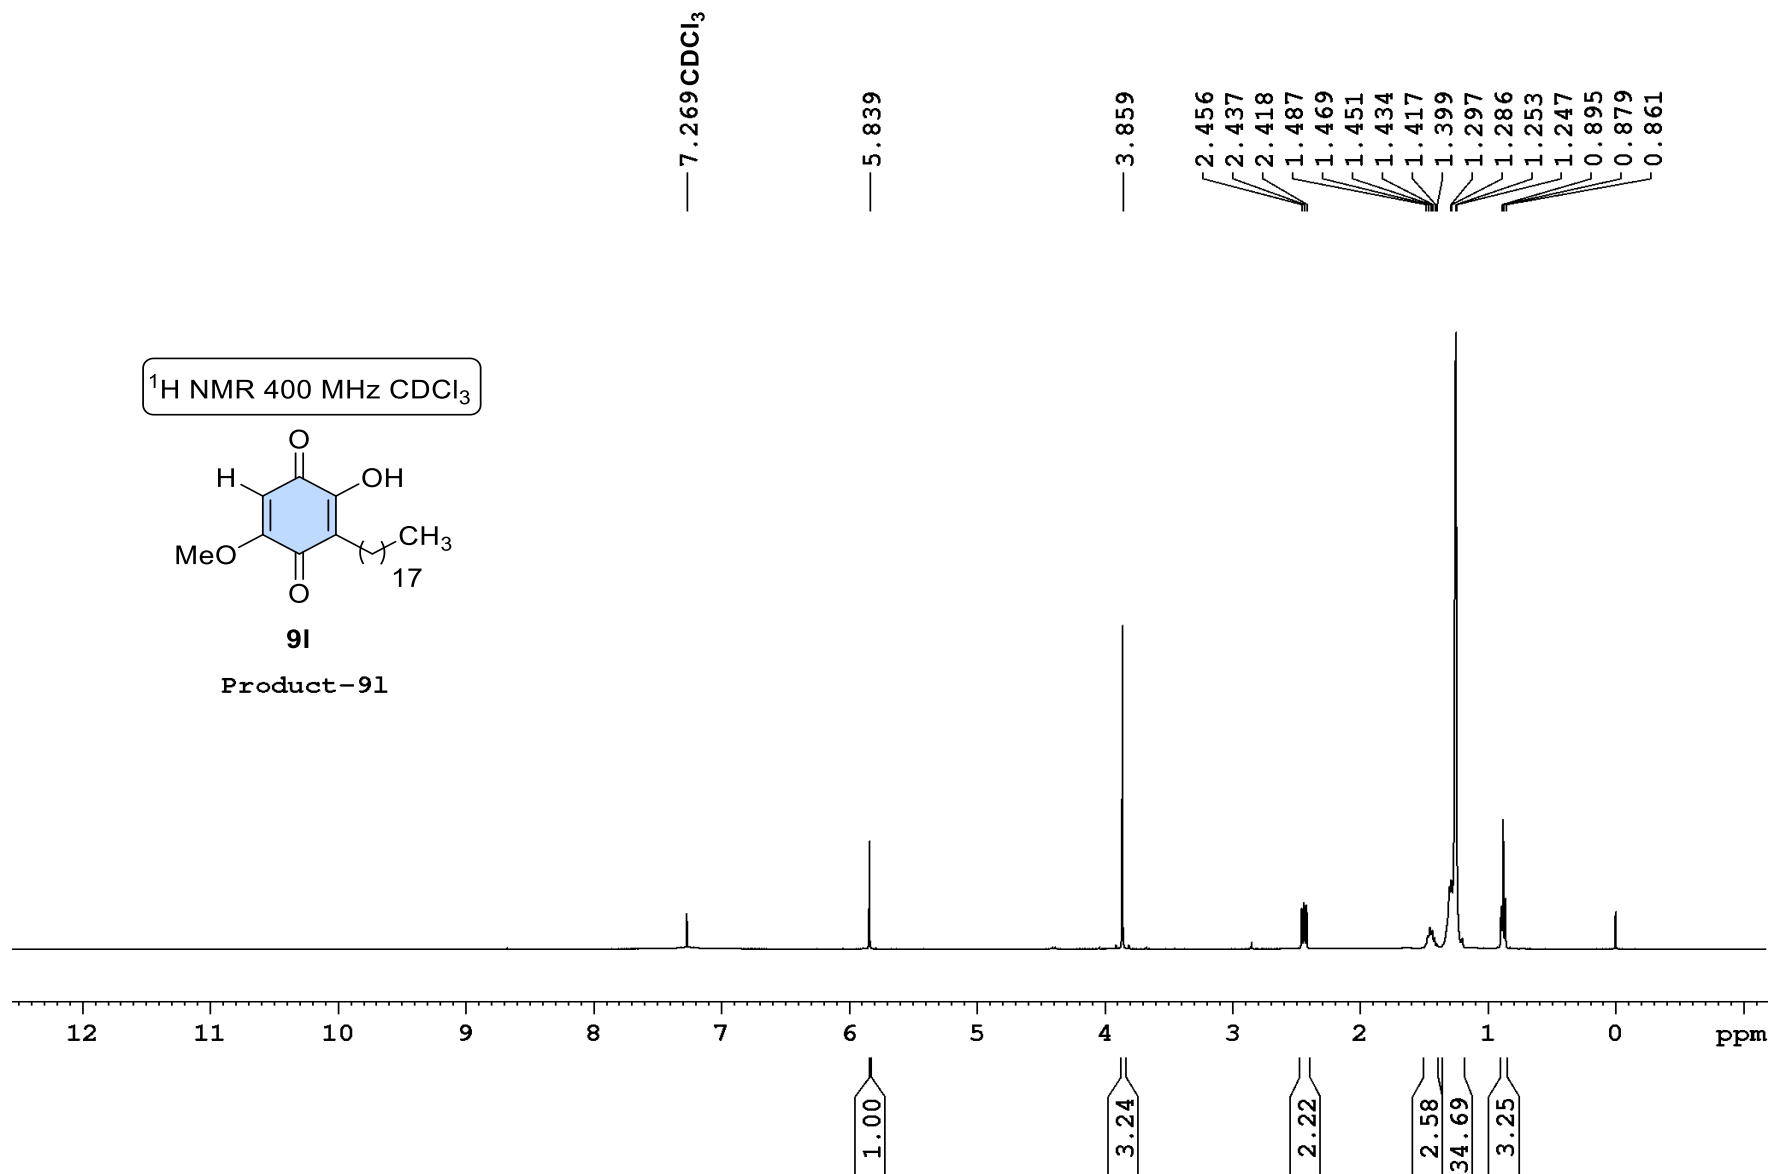

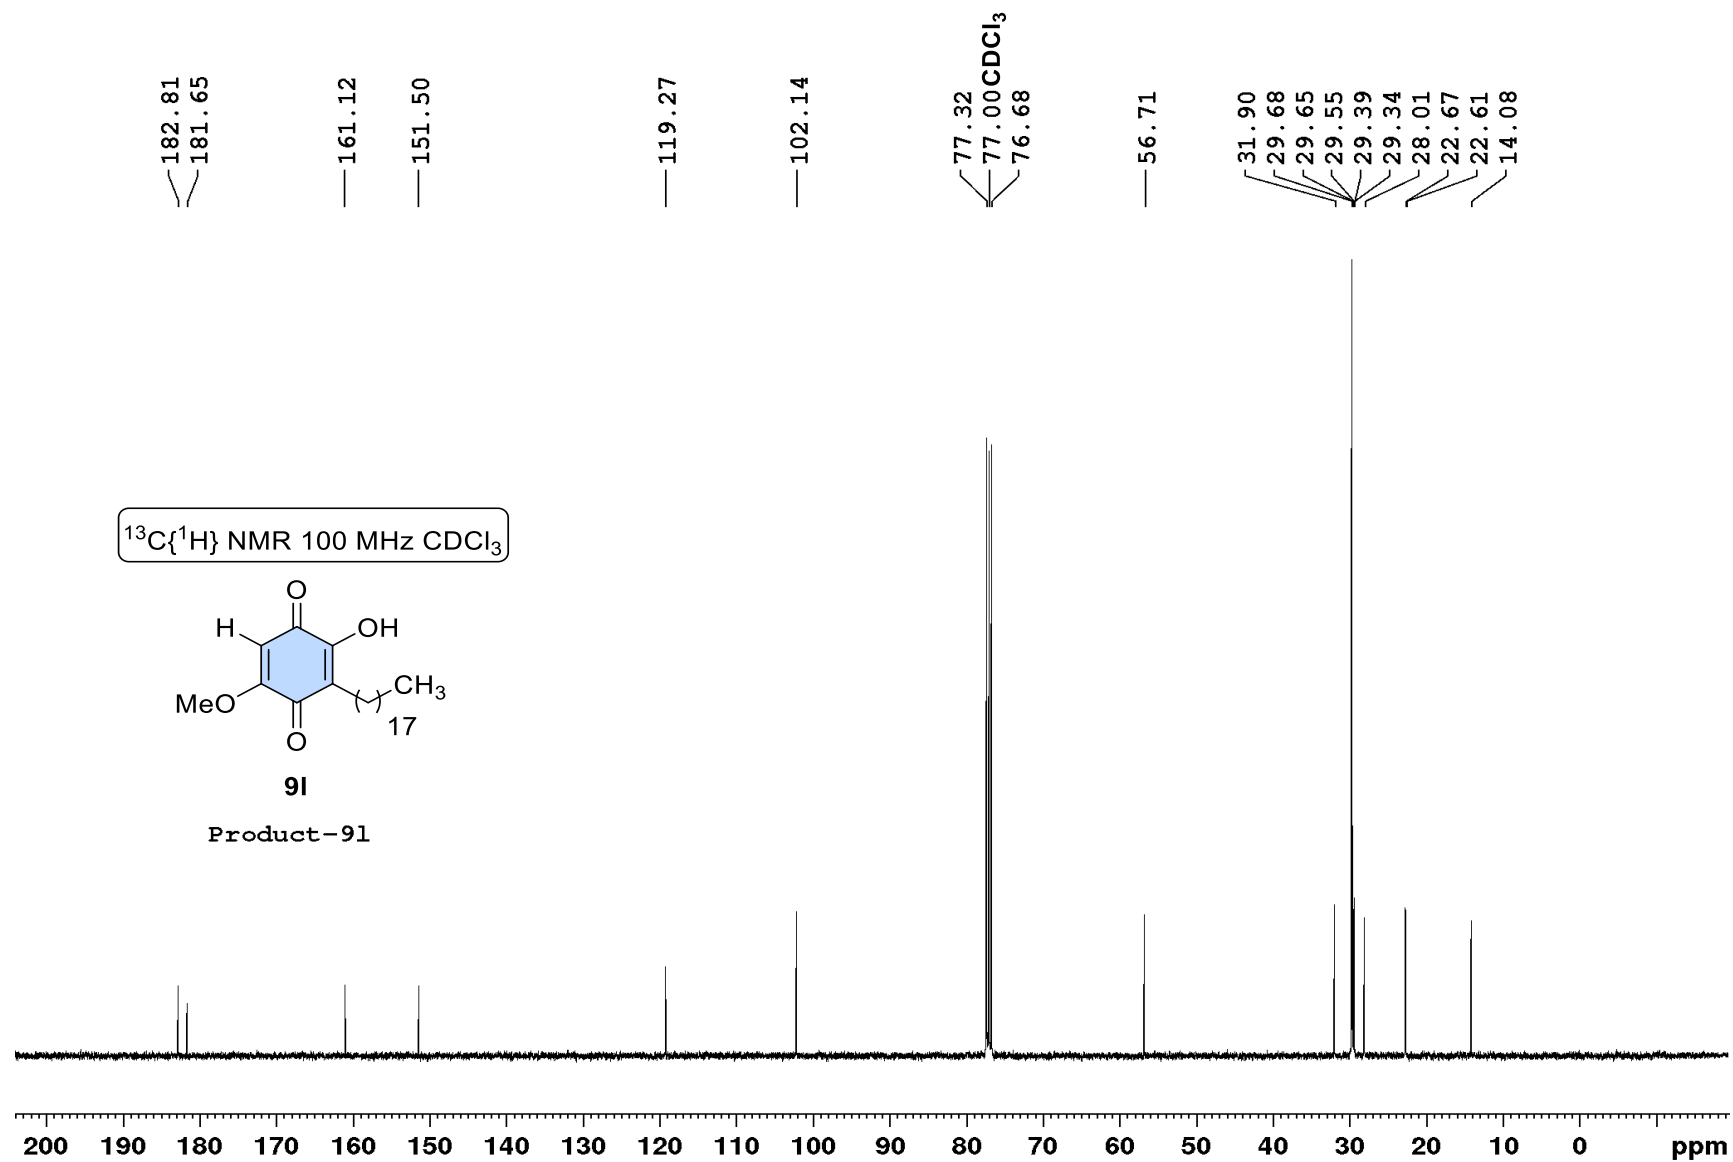

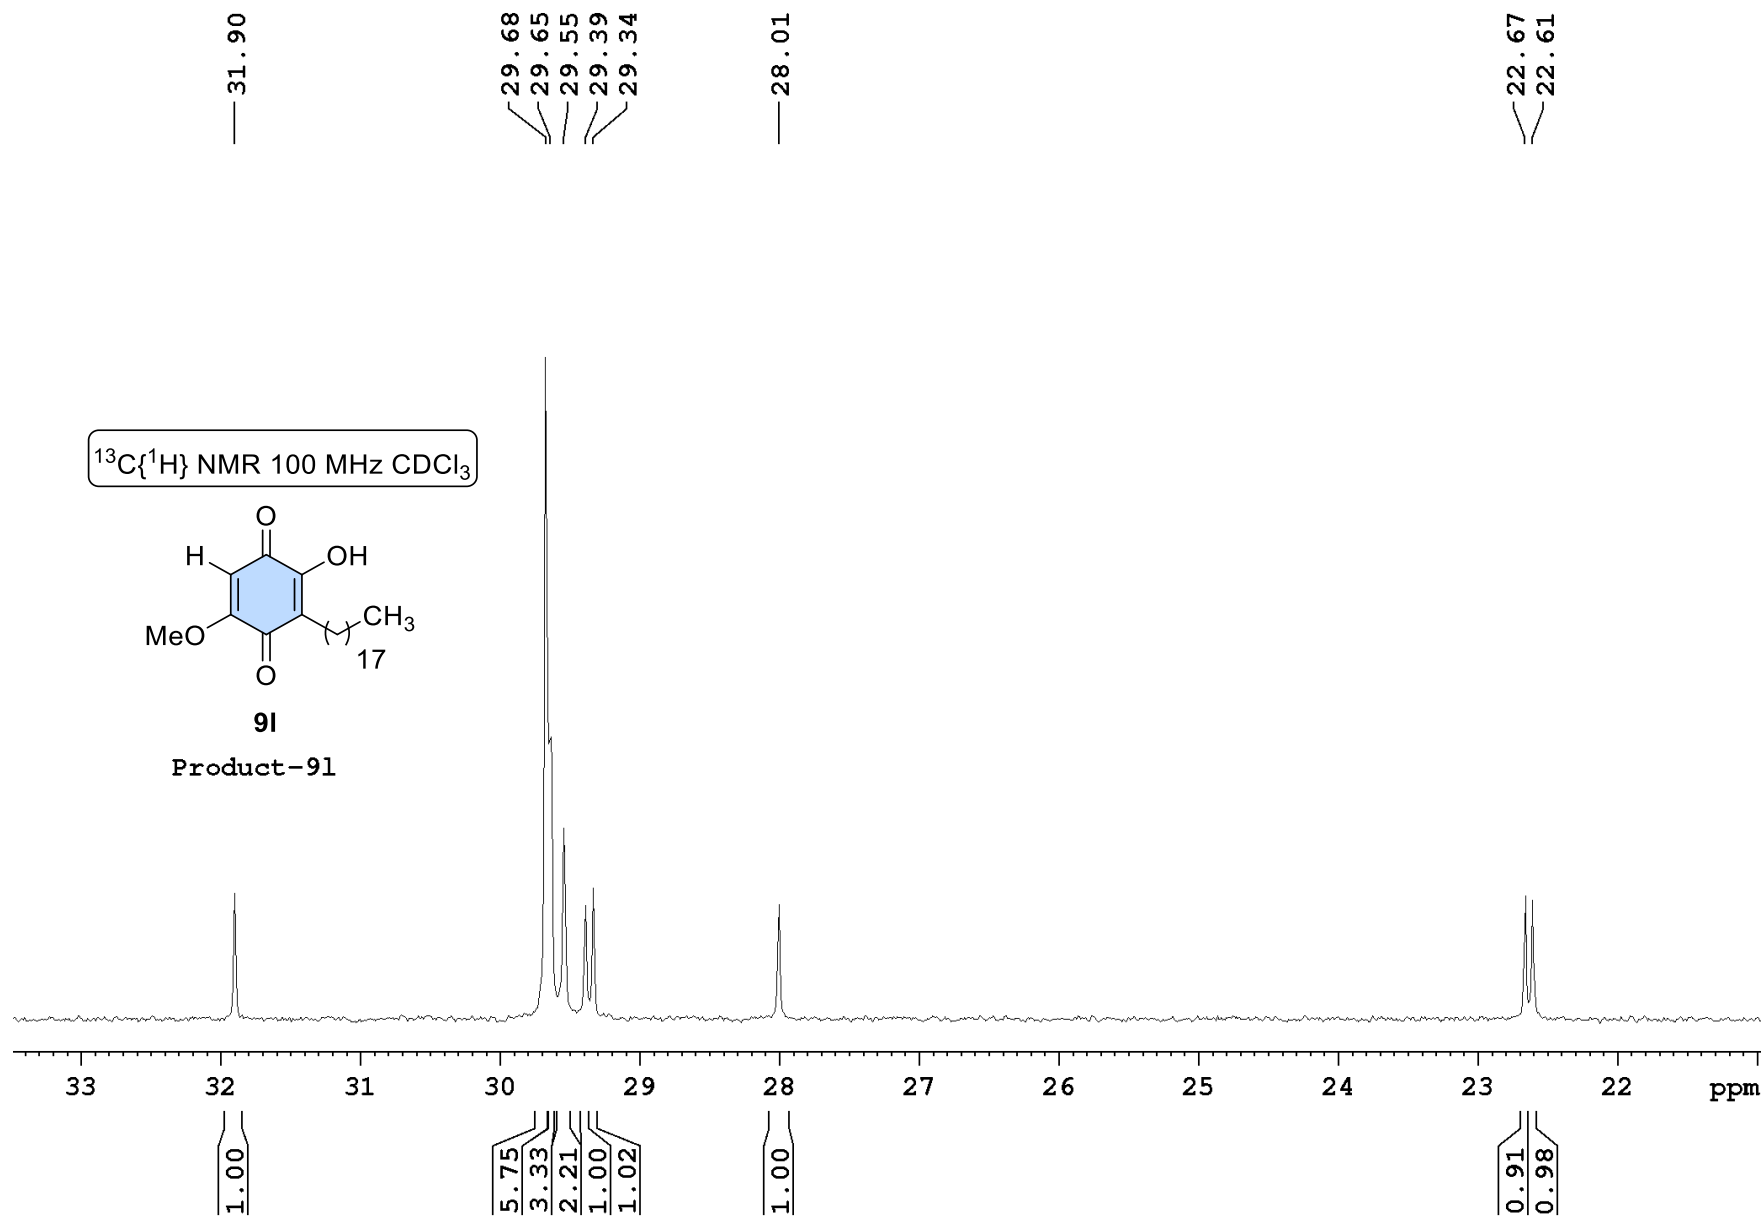

DEPT -135 100 MHz CDCl<sub>3</sub>

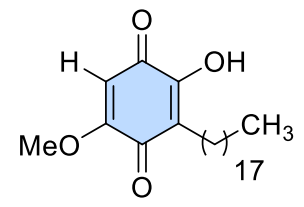

91

Product-91

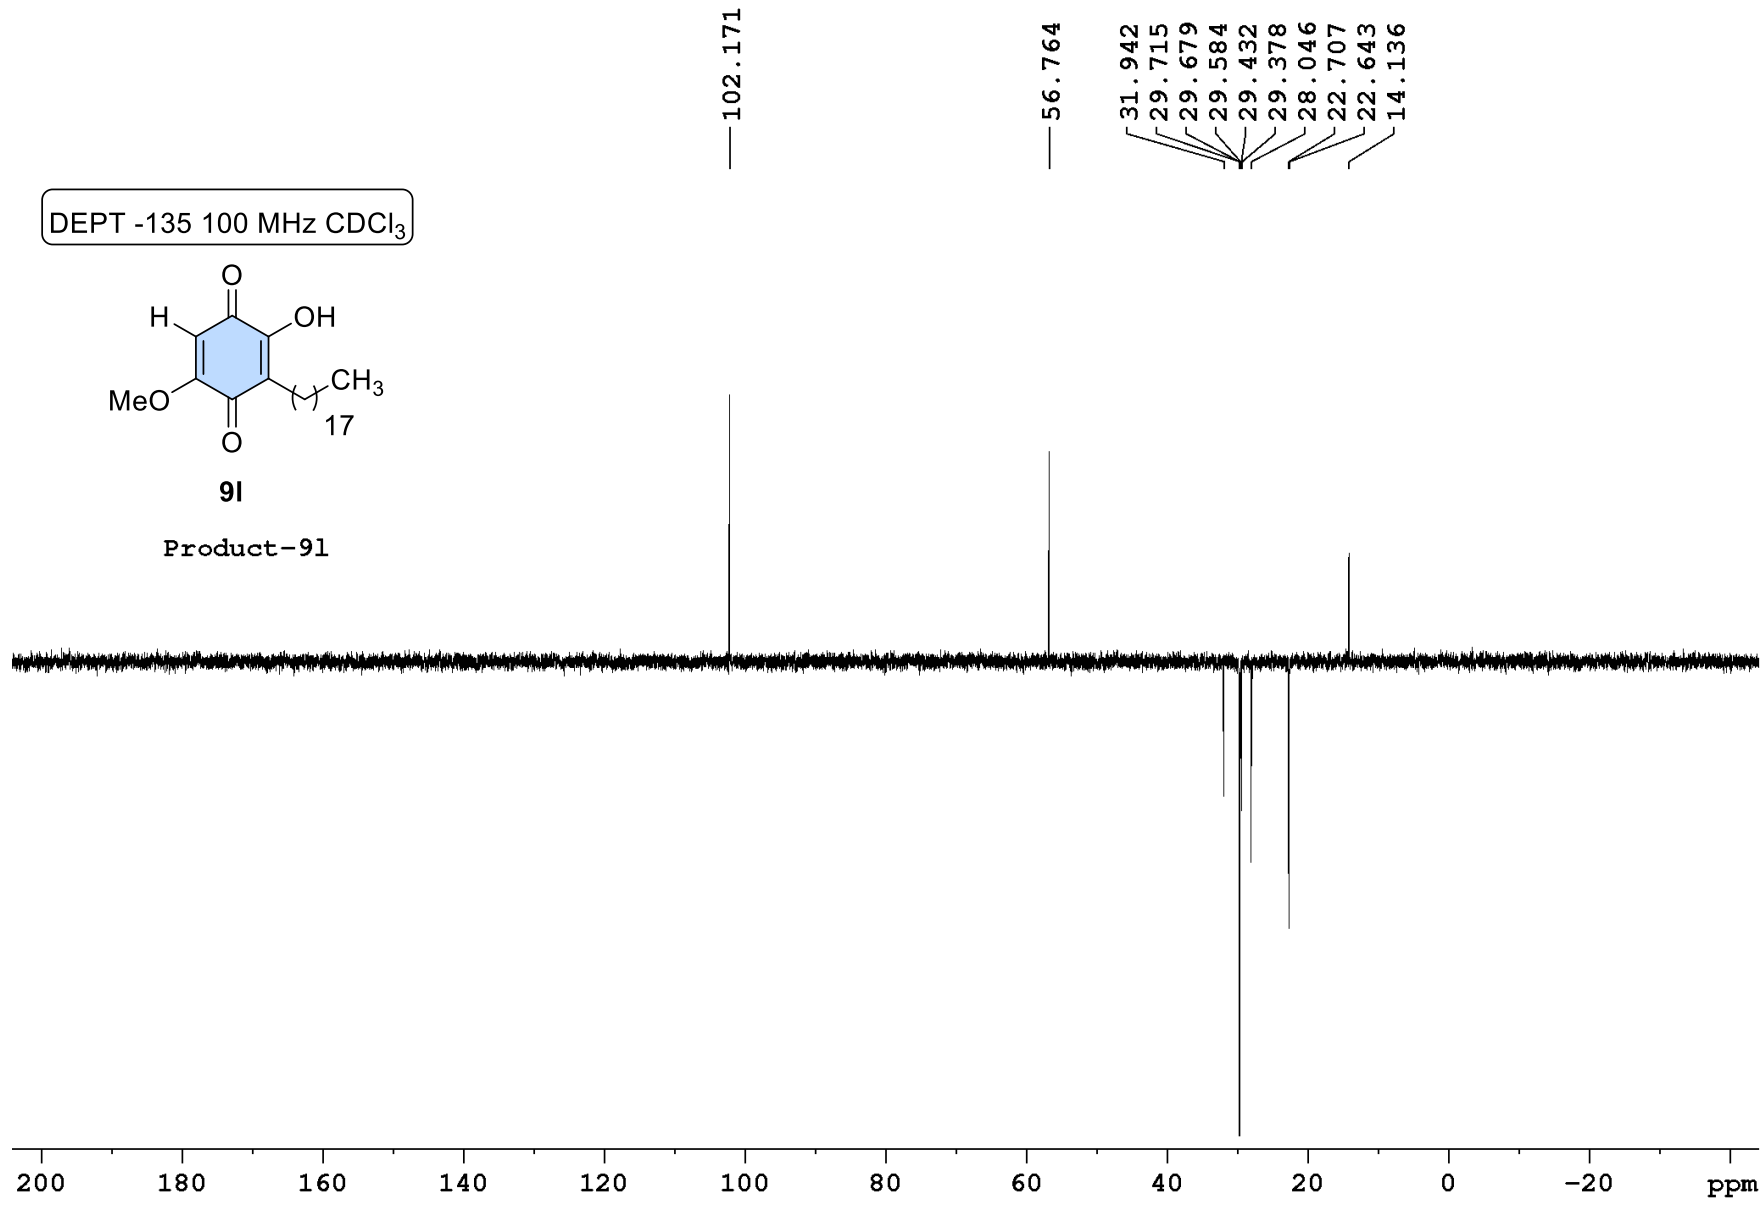

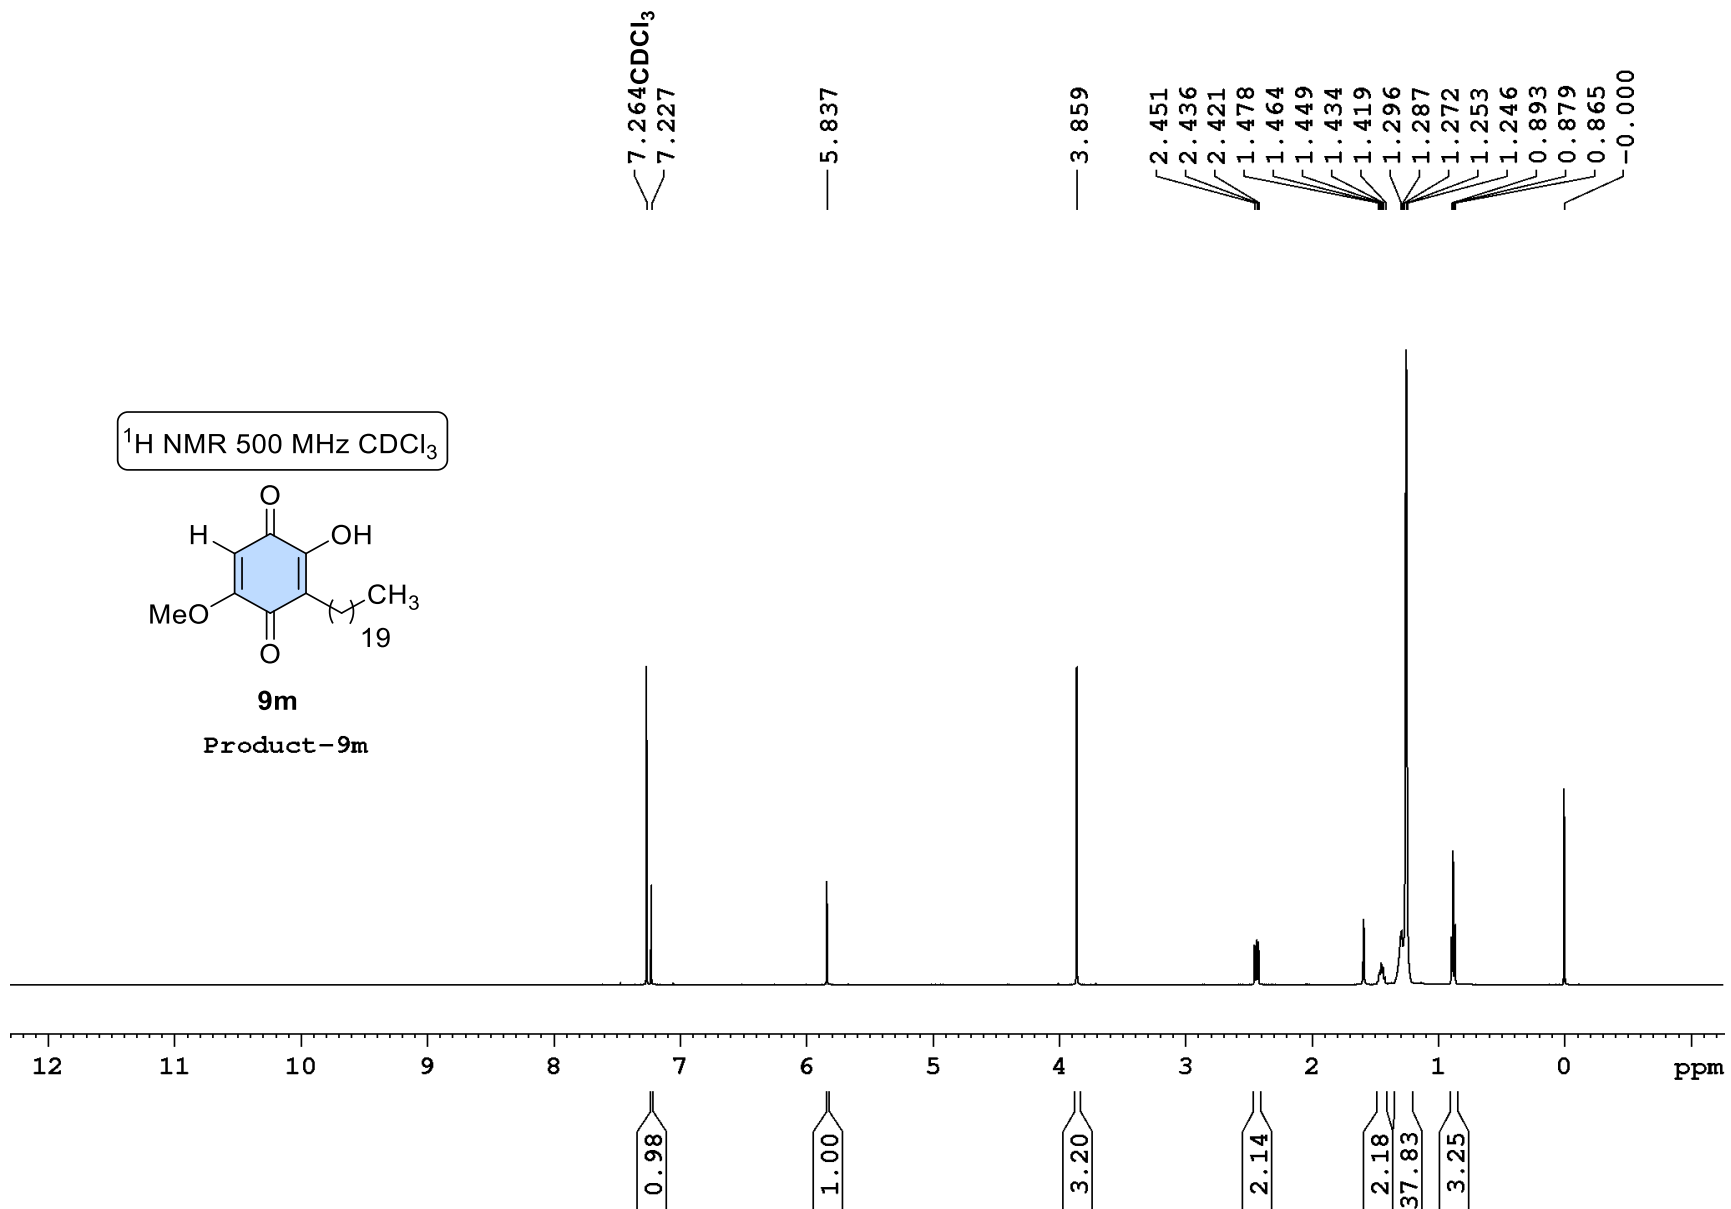

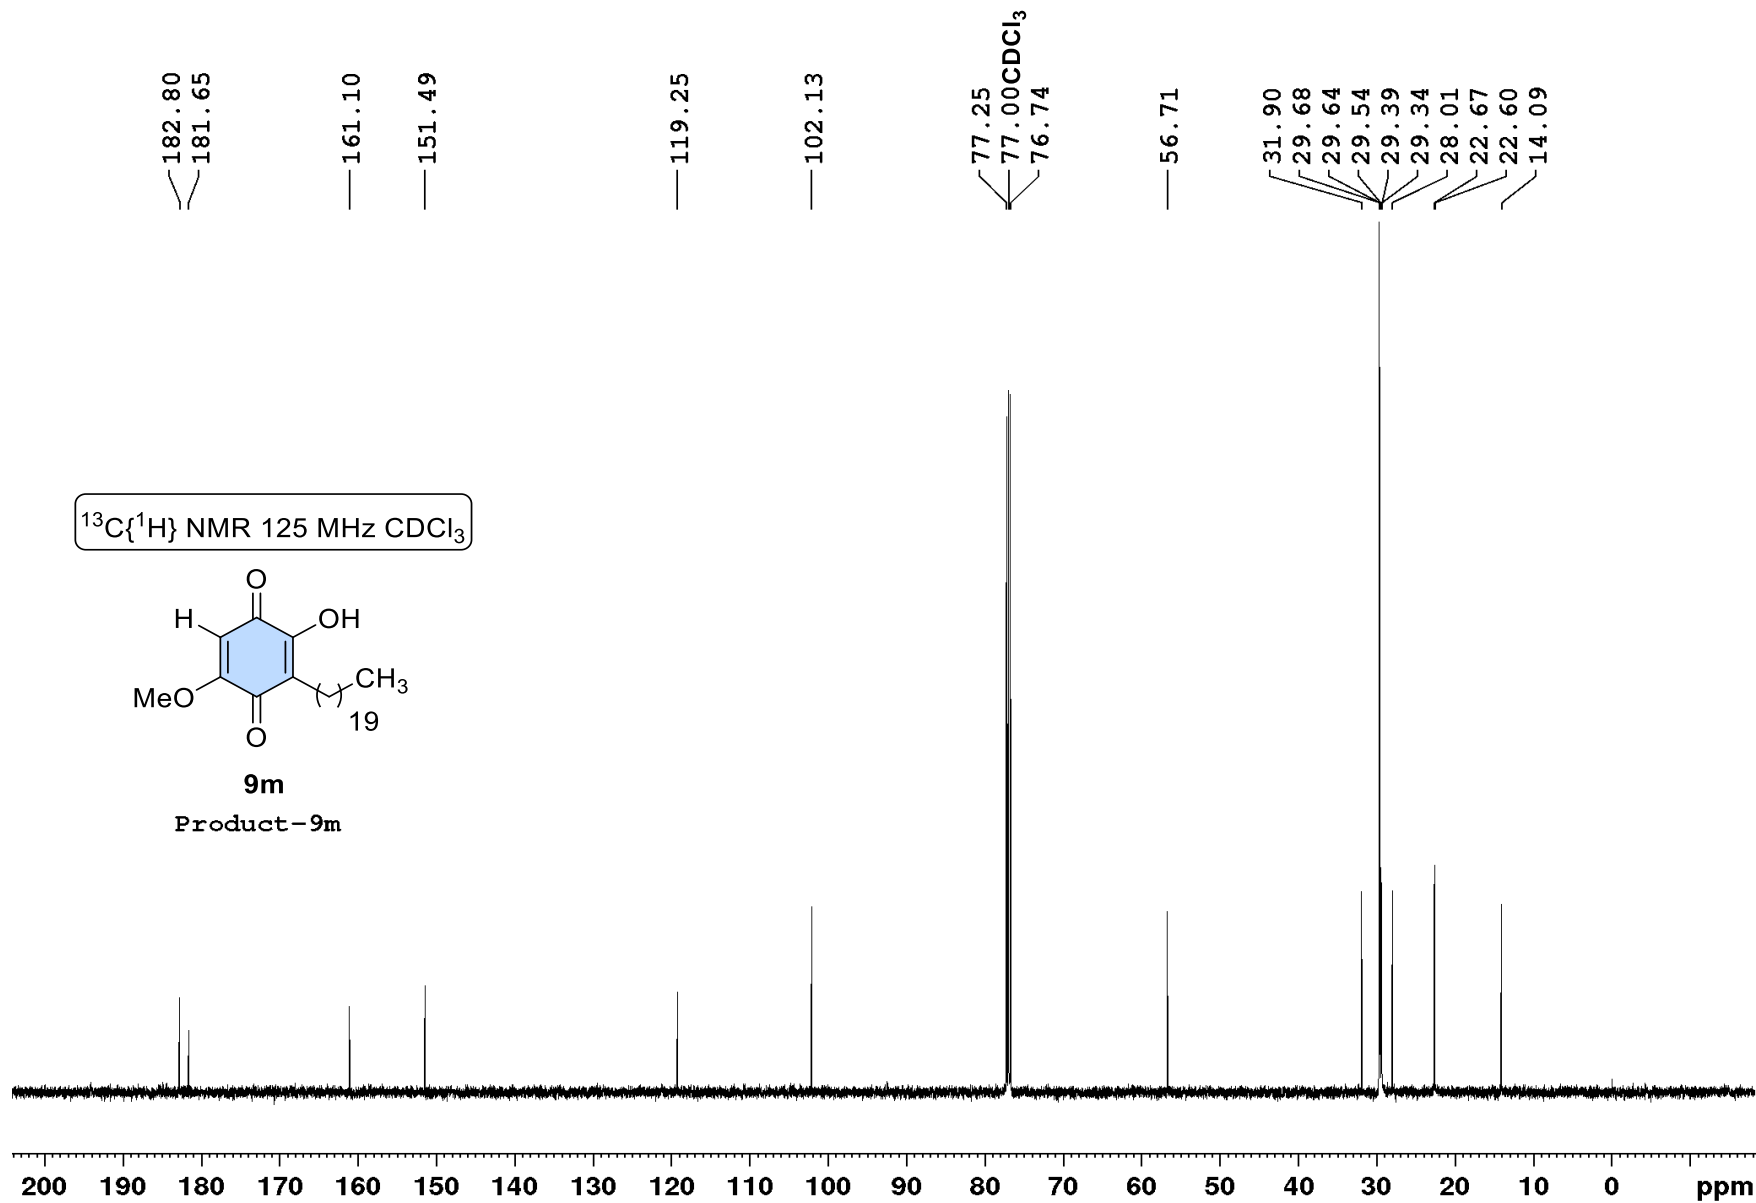



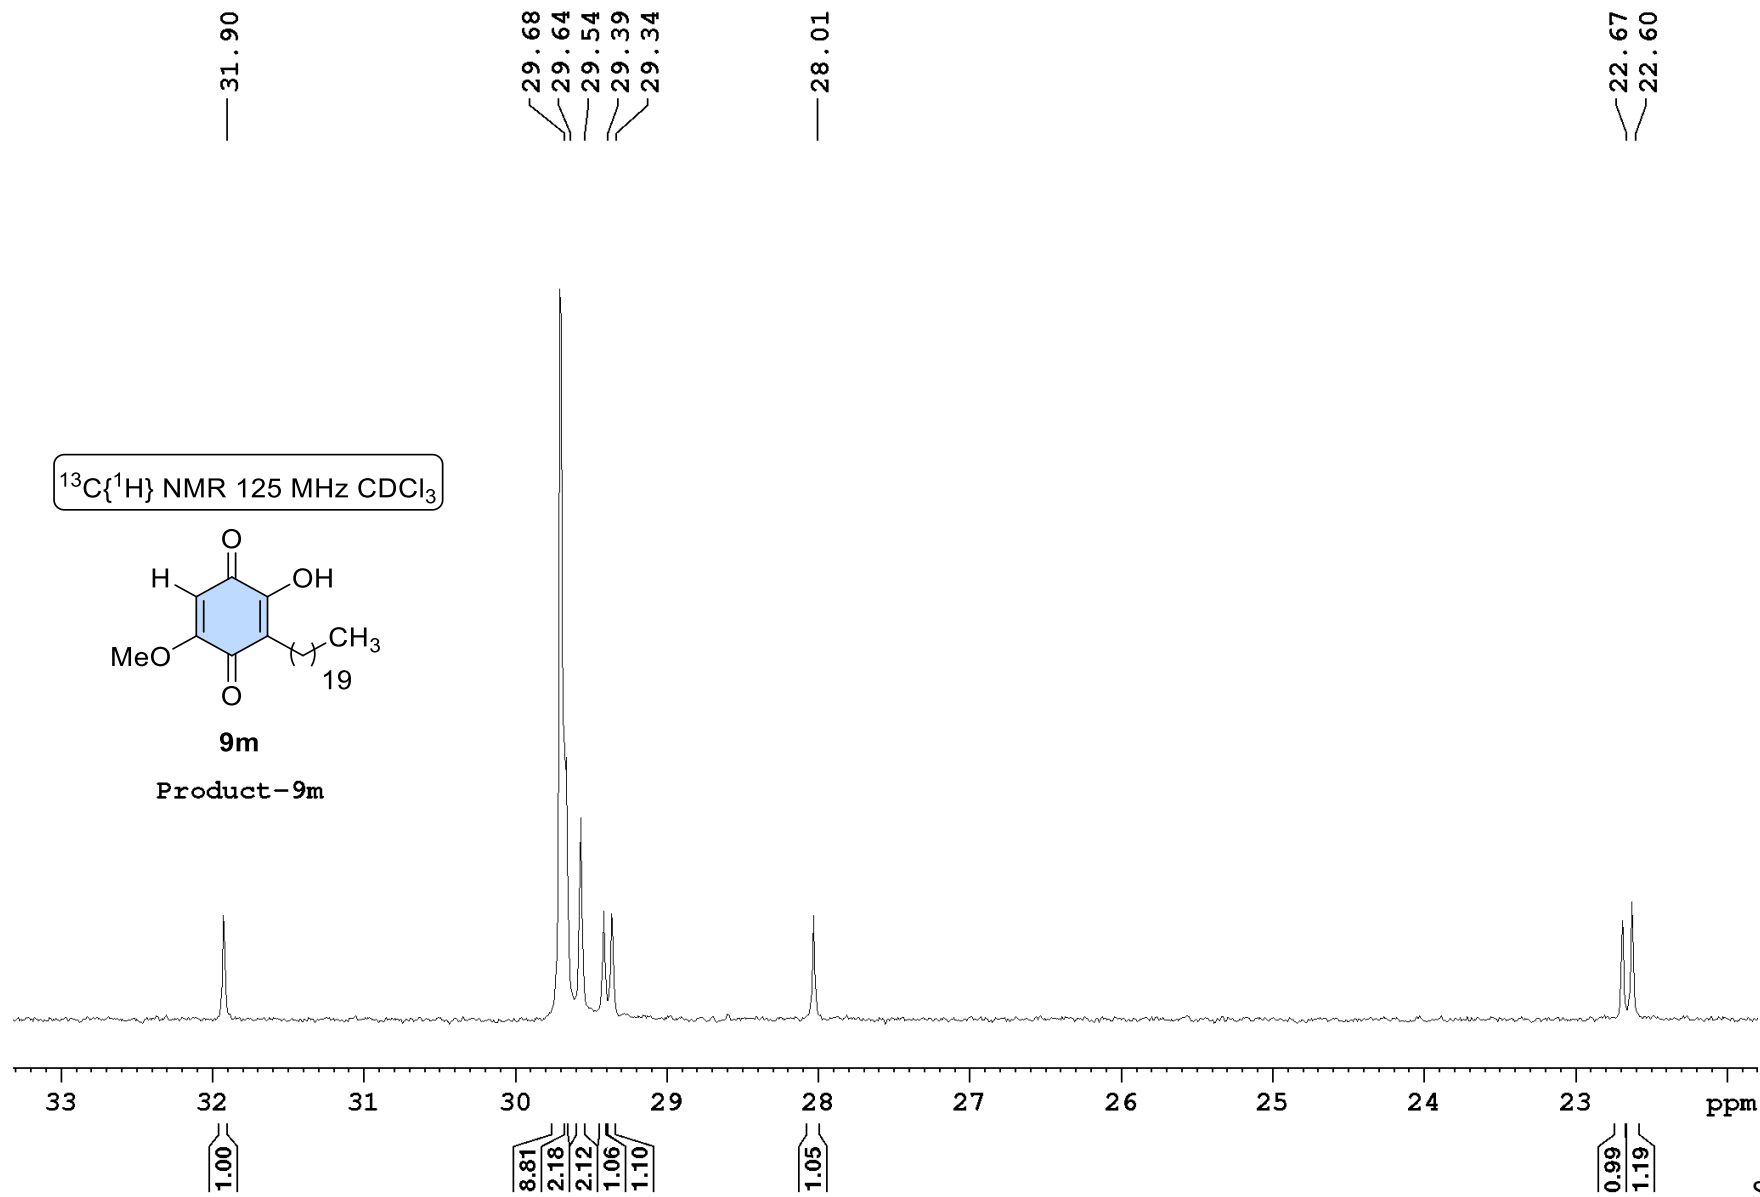

DEPT-135 125 MHz CDCl<sub>3</sub>

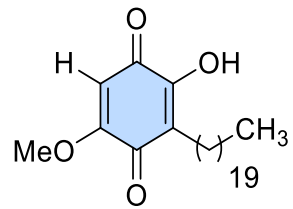

**9m**

Product-9m

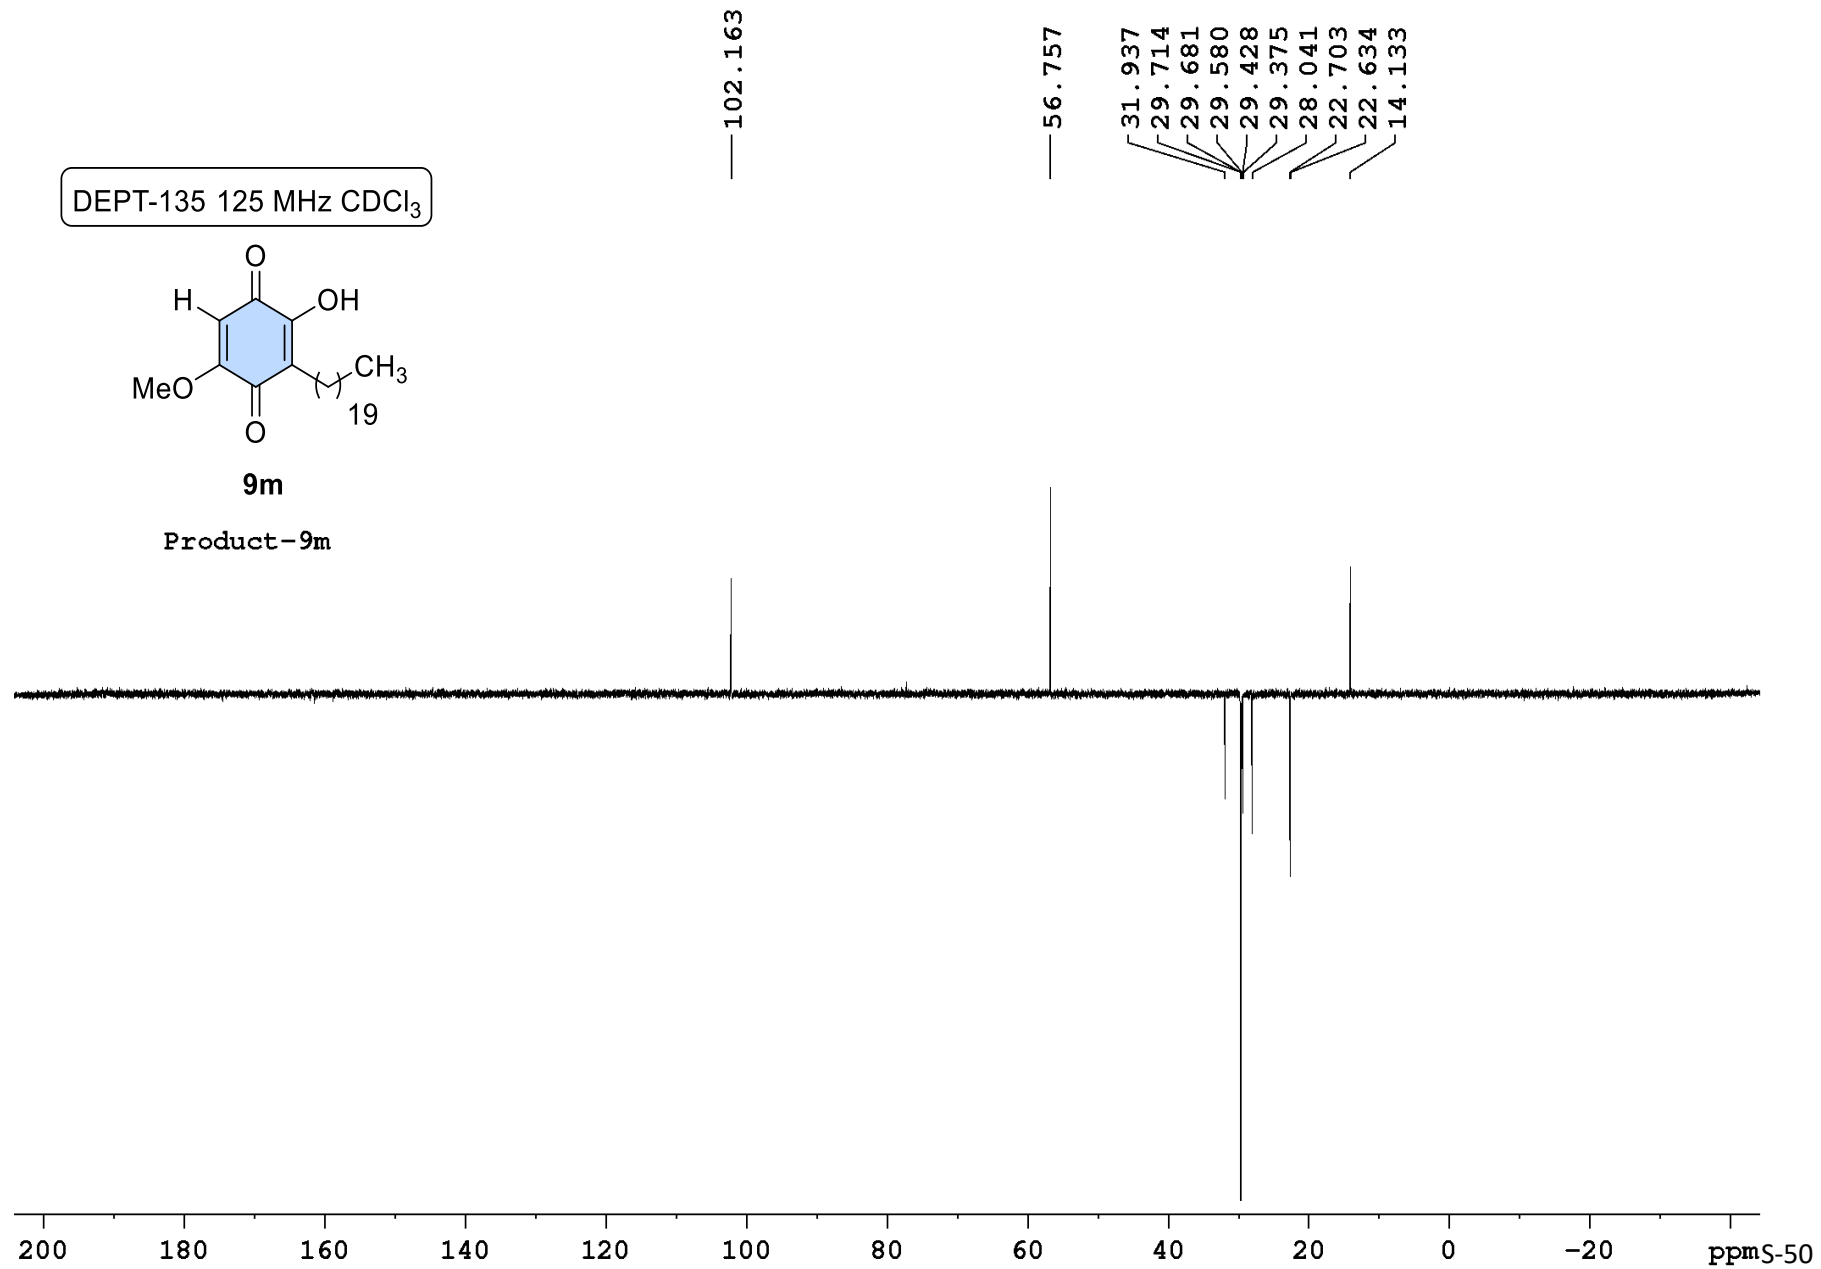

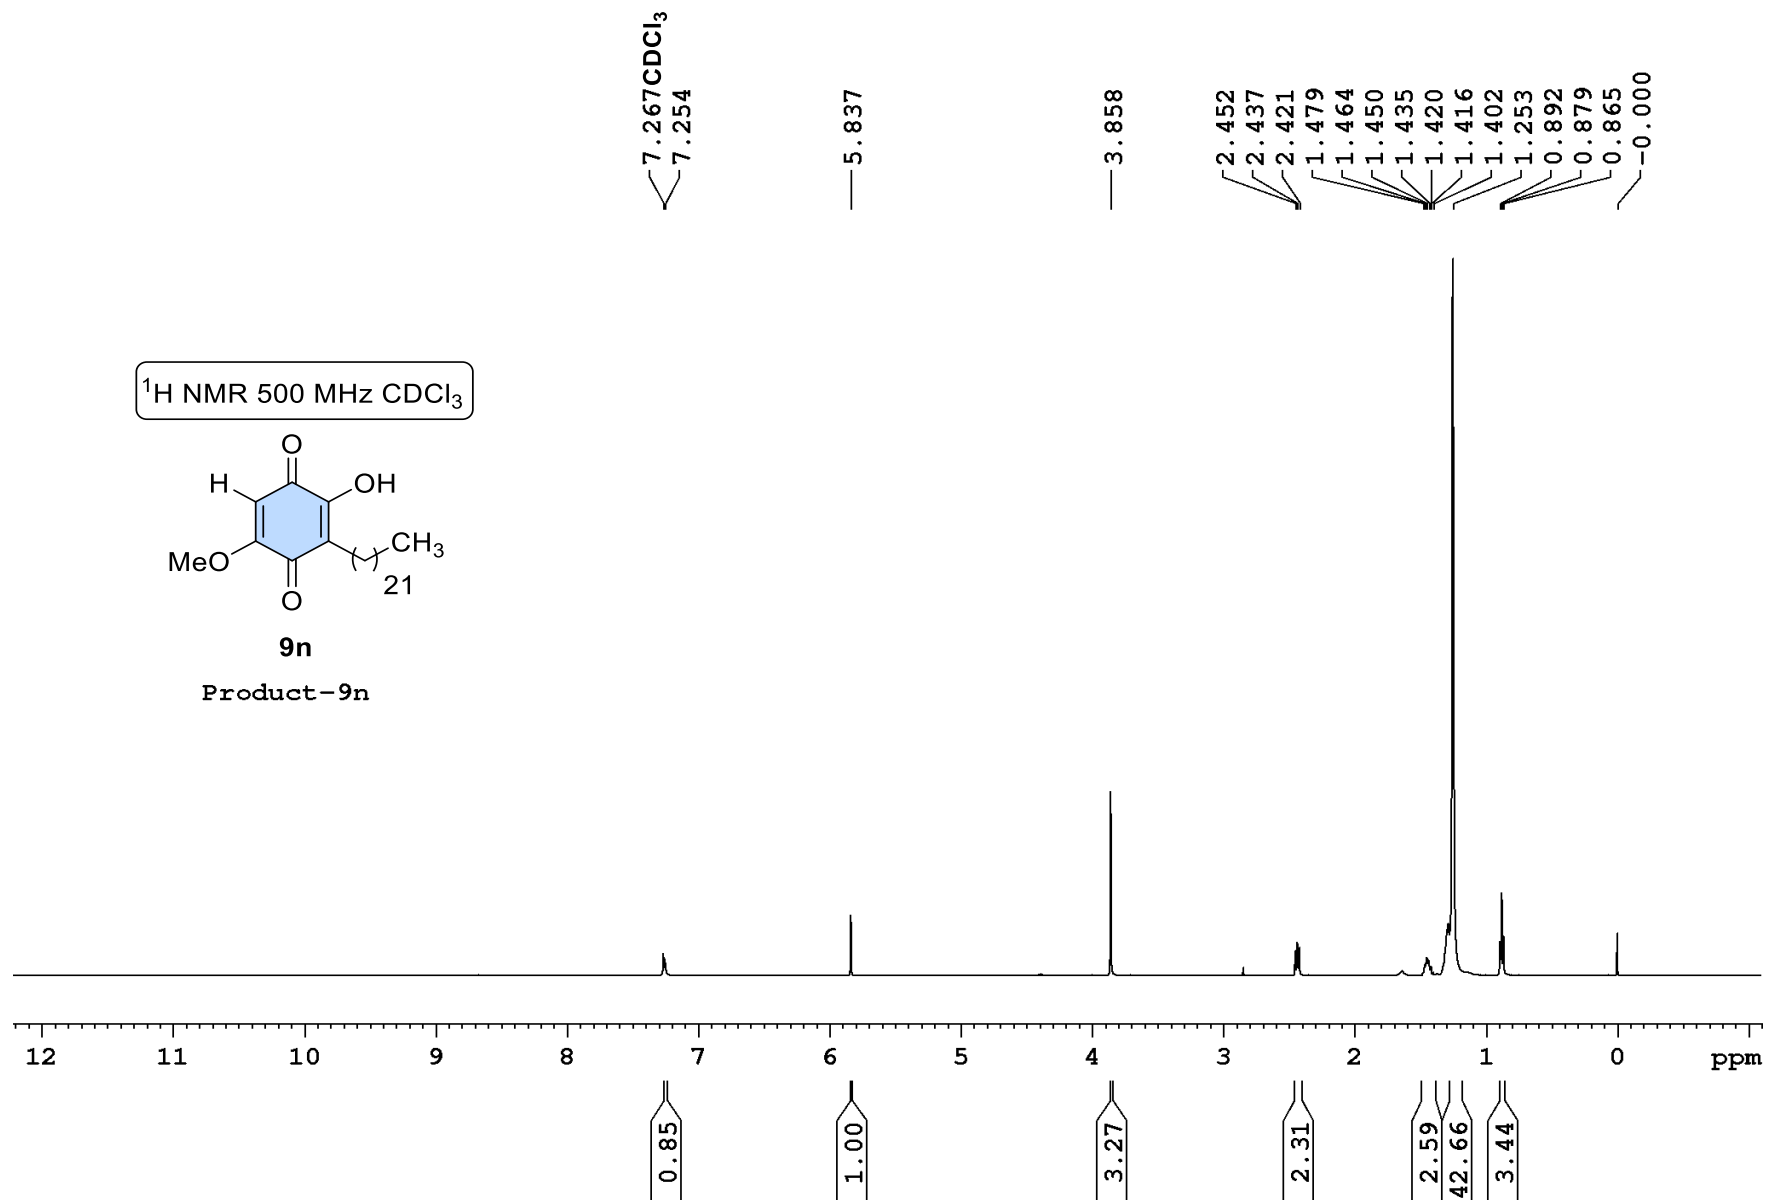

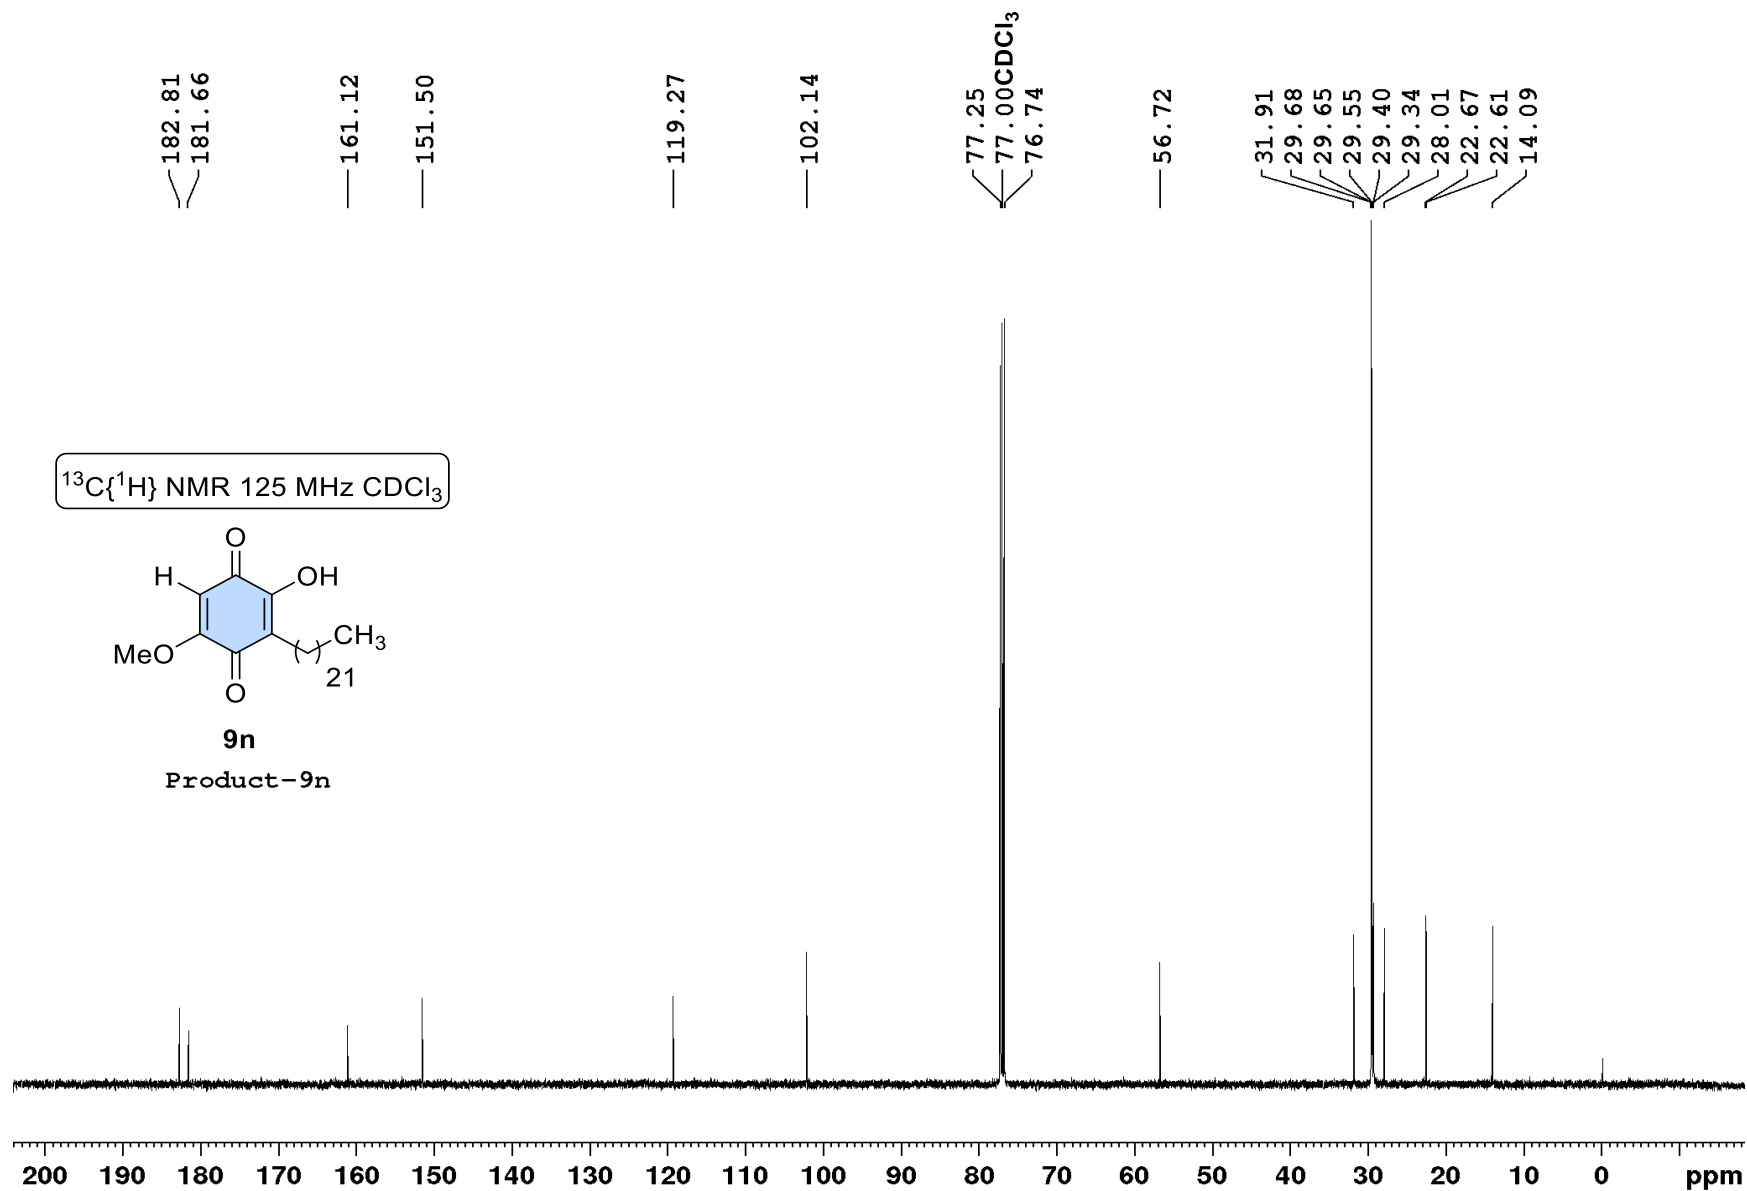

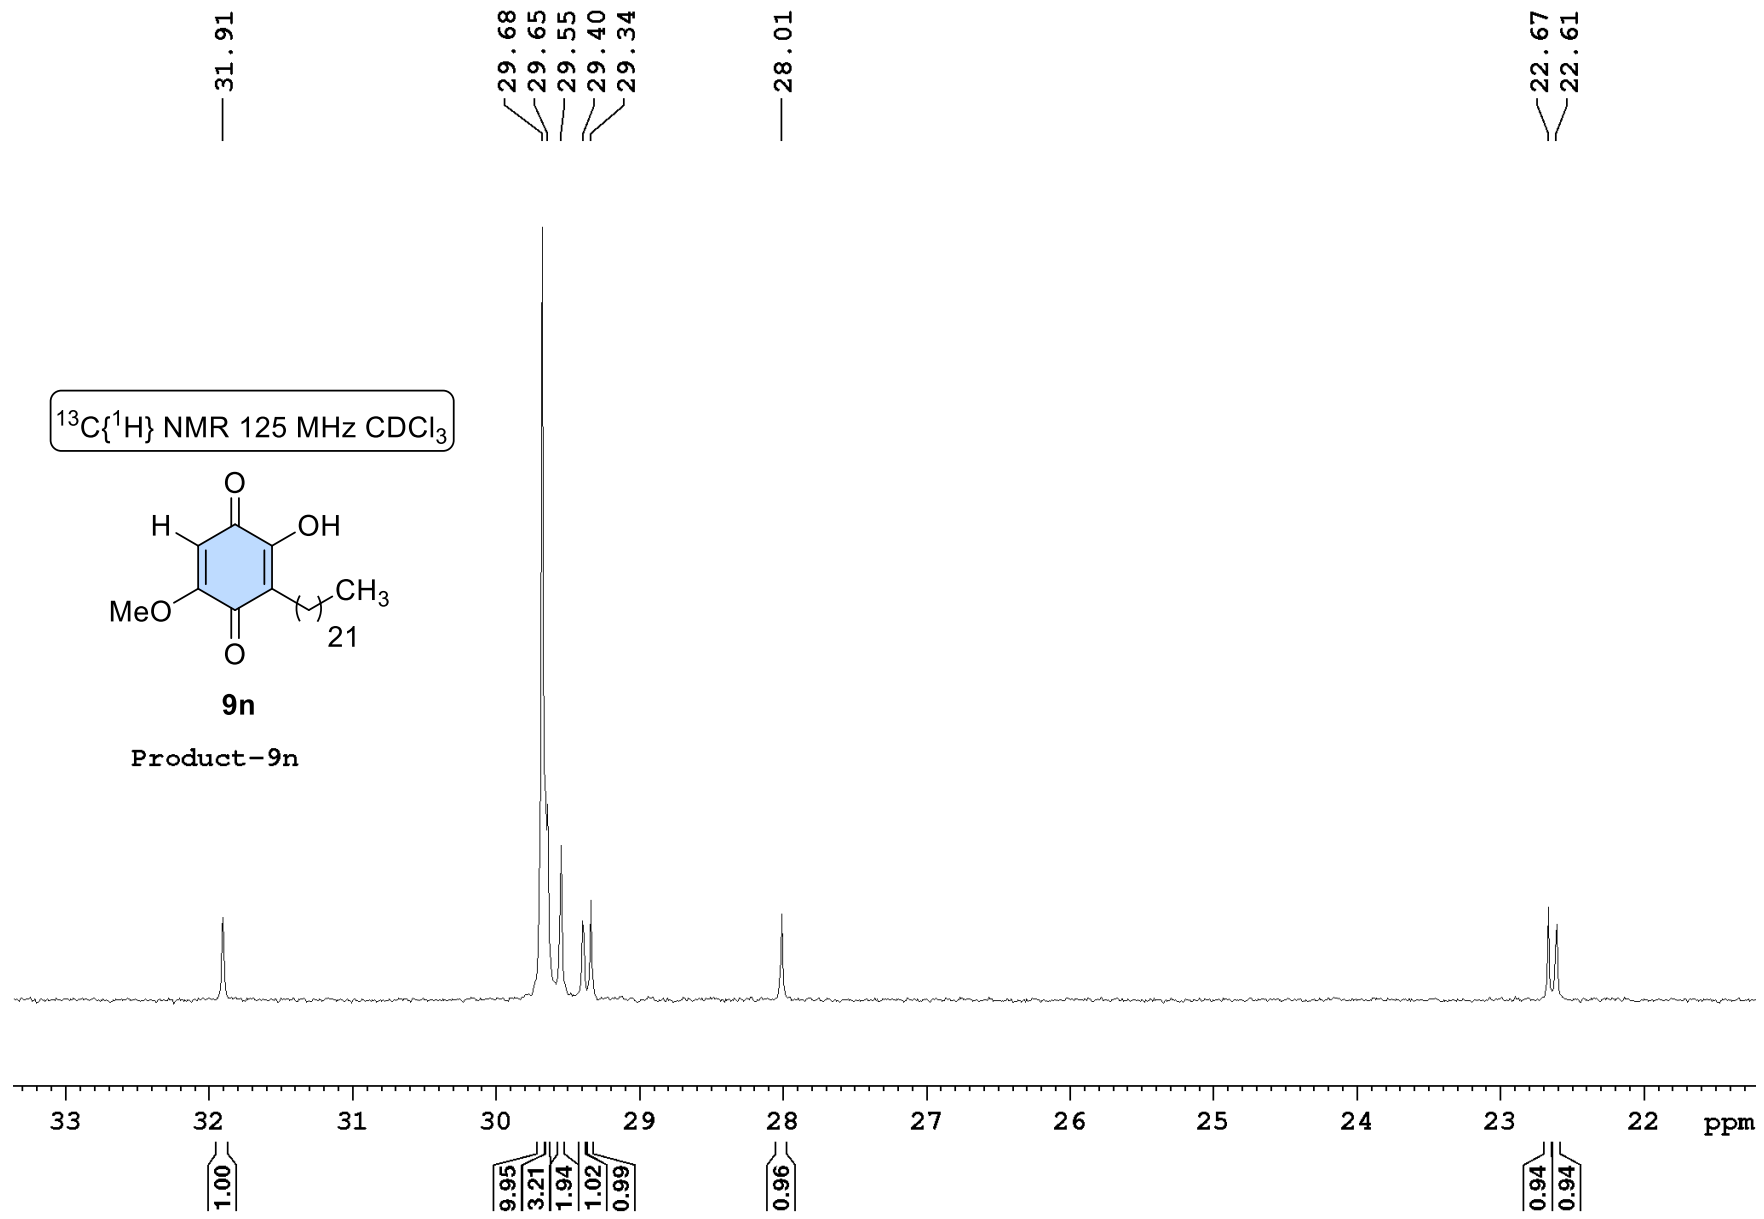

DEPT-135 125 MHz CDCl<sub>3</sub>

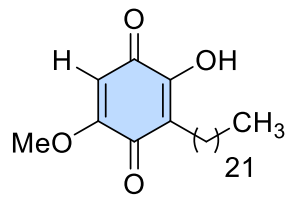

**9n**

Product-9n

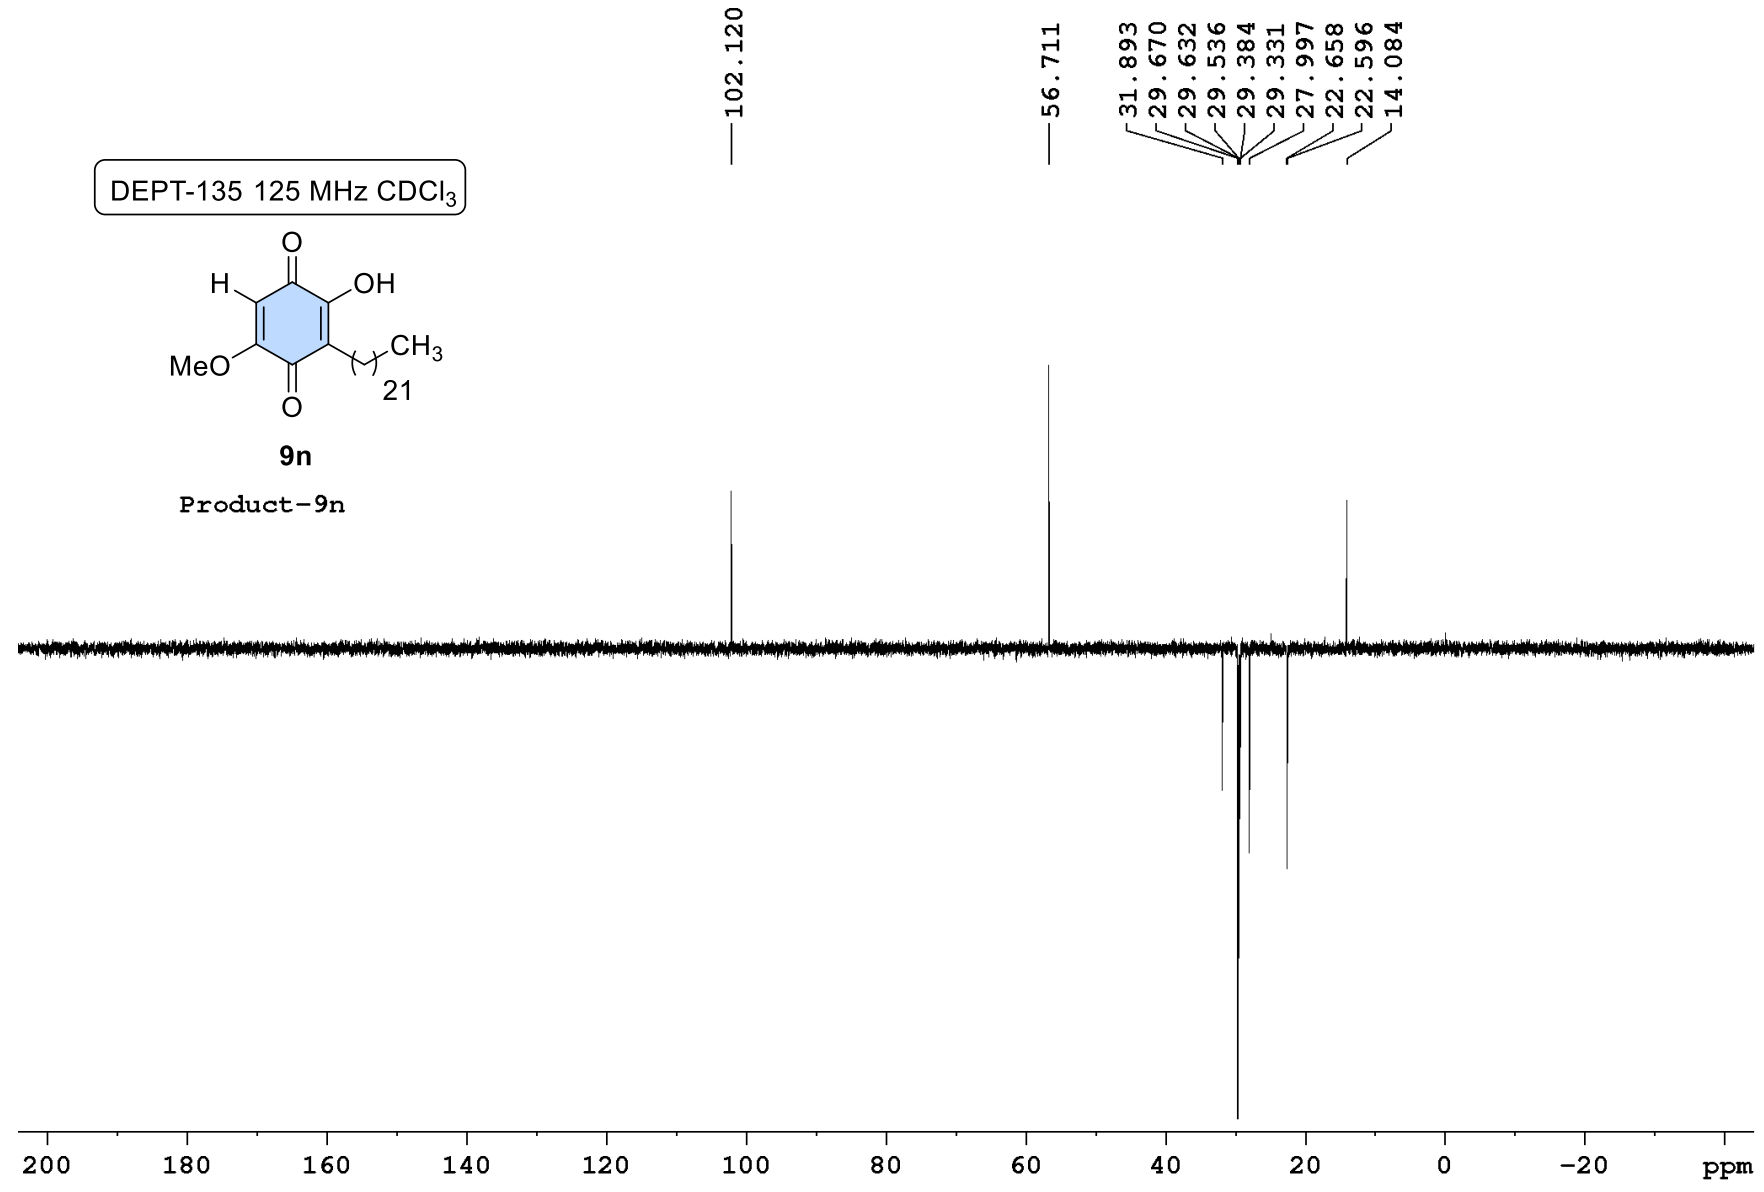

7.310  
7.282CDCl<sub>3</sub>

5.843  
3.861  
2.465  
2.459  
2.453  
2.445  
2.433  
2.425  
2.413  
1.544  
1.530  
1.517  
1.504  
1.491  
1.480  
1.470  
1.458  
1.449  
1.445  
1.437  
1.433  
1.426  
1.421  
1.413  
1.400  
1.333  
1.313  
1.300  
1.281  
1.278  
1.272  
1.267  
1.258  
1.256  
1.247  
1.236  
1.231  
1.226  
1.221  
1.213  
1.199  
1.192  
1.152  
1.138  
1.132  
1.129  
1.125  
1.119  
1.106  
1.099  
1.083  
0.927  
0.914  
0.866  
0.852  
-0.000

<sup>1</sup>H NMR 500 MHz CDCl<sub>3</sub>

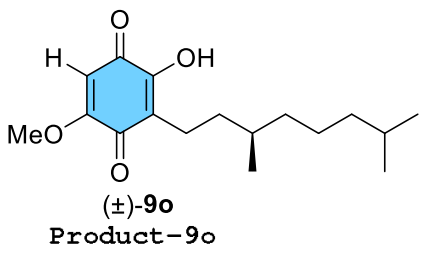

12 11 10 9 8 7 6 5 4 3 2 1 0 ppm

0.89  
0.92  
3.00  
2.02  
3.08  
4.24  
2.99  
2.98  
6.10

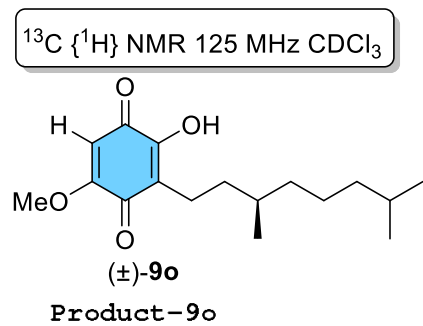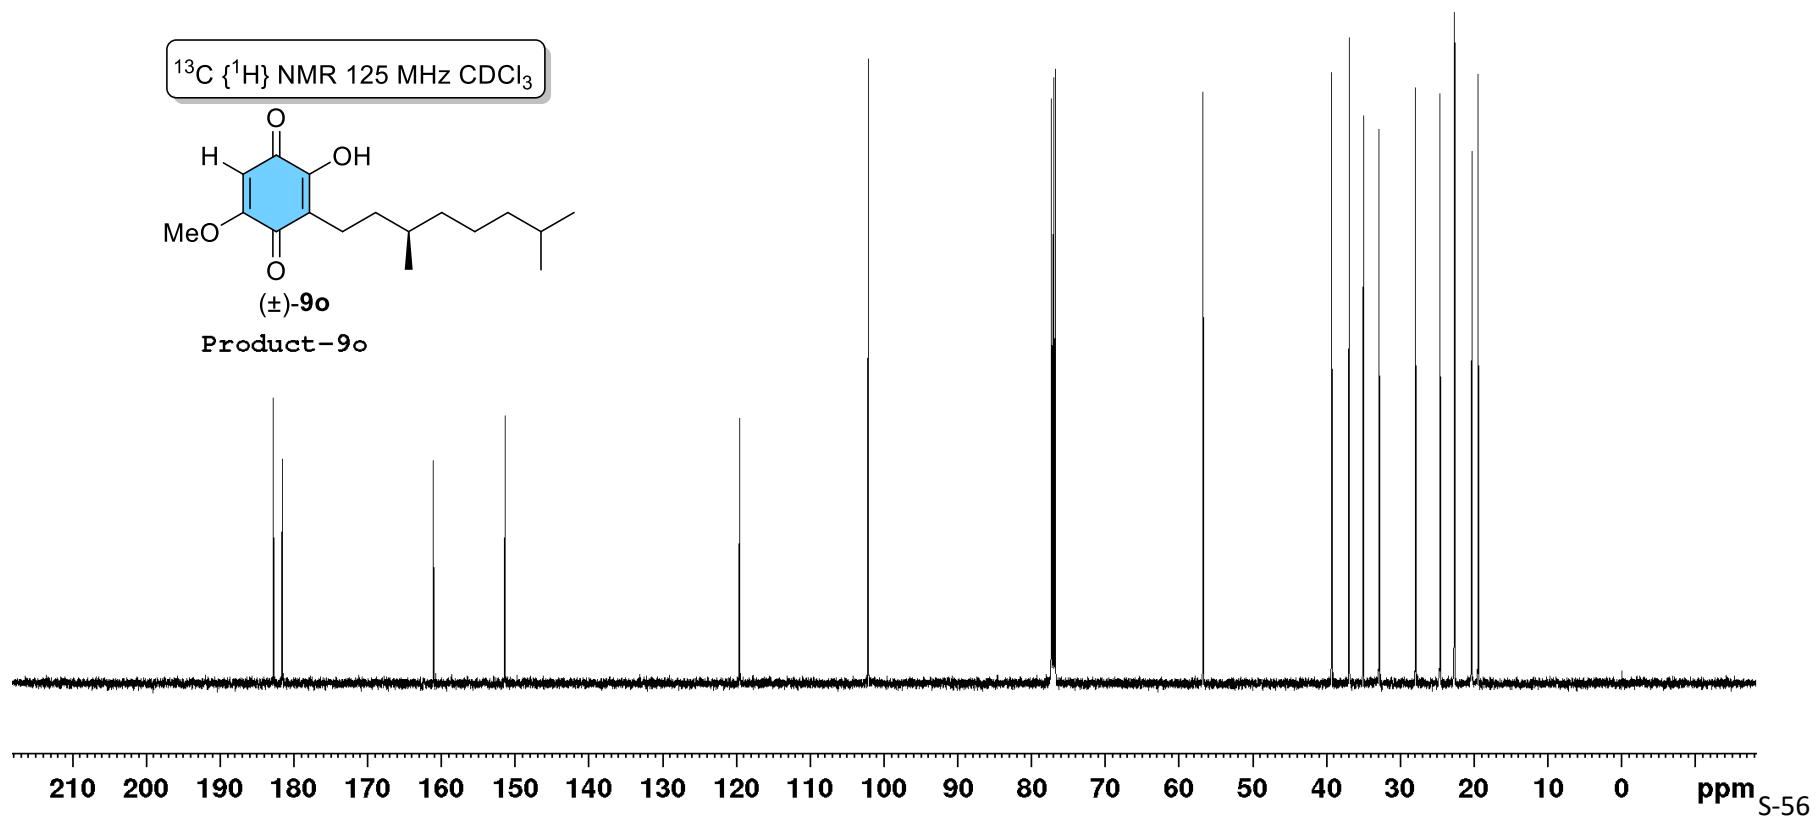

182.85  
181.65

161.13

151.43

119.61

102.16

77.30  
77.05 CDCl<sub>3</sub>  
76.80

56.75

39.31  
36.93  
35.03  
32.86  
27.94  
24.61  
22.70  
22.62  
20.33  
19.45

-0.01



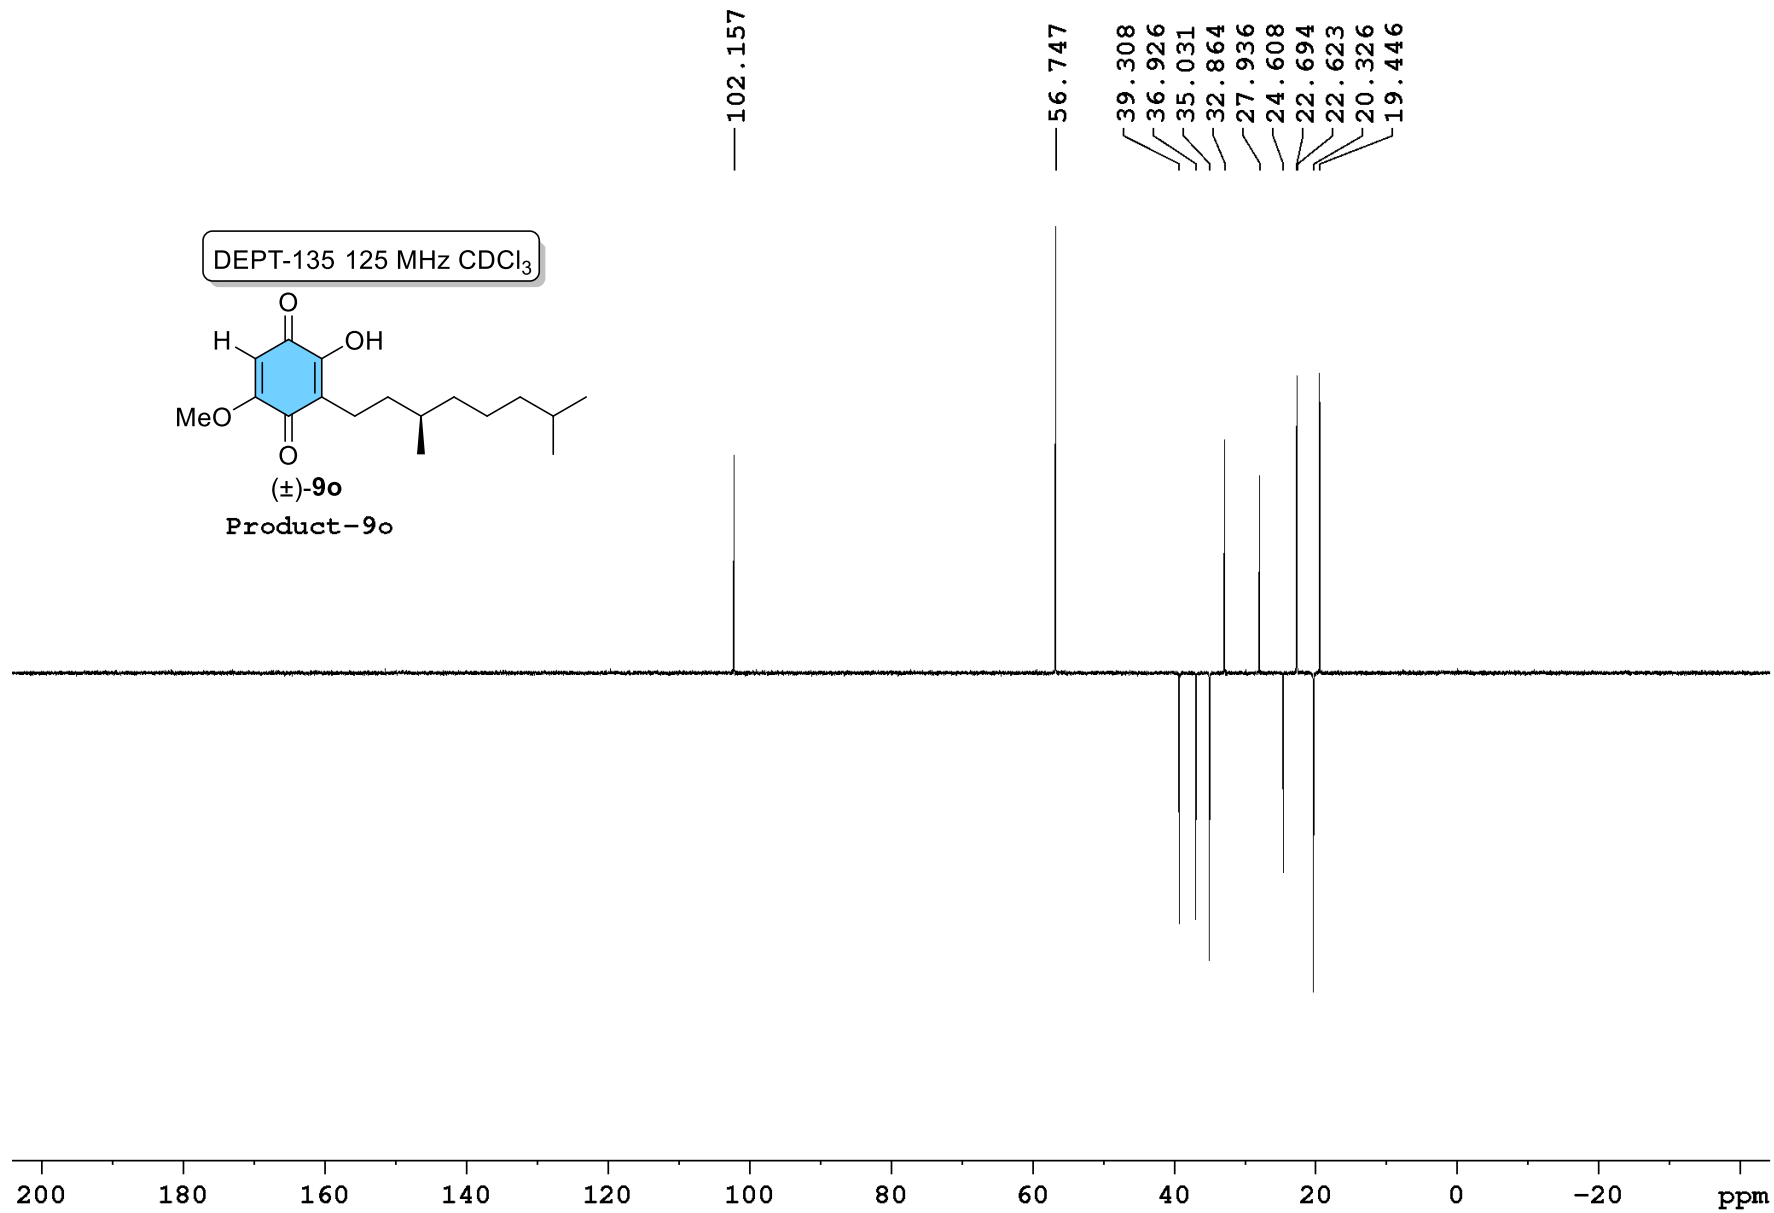

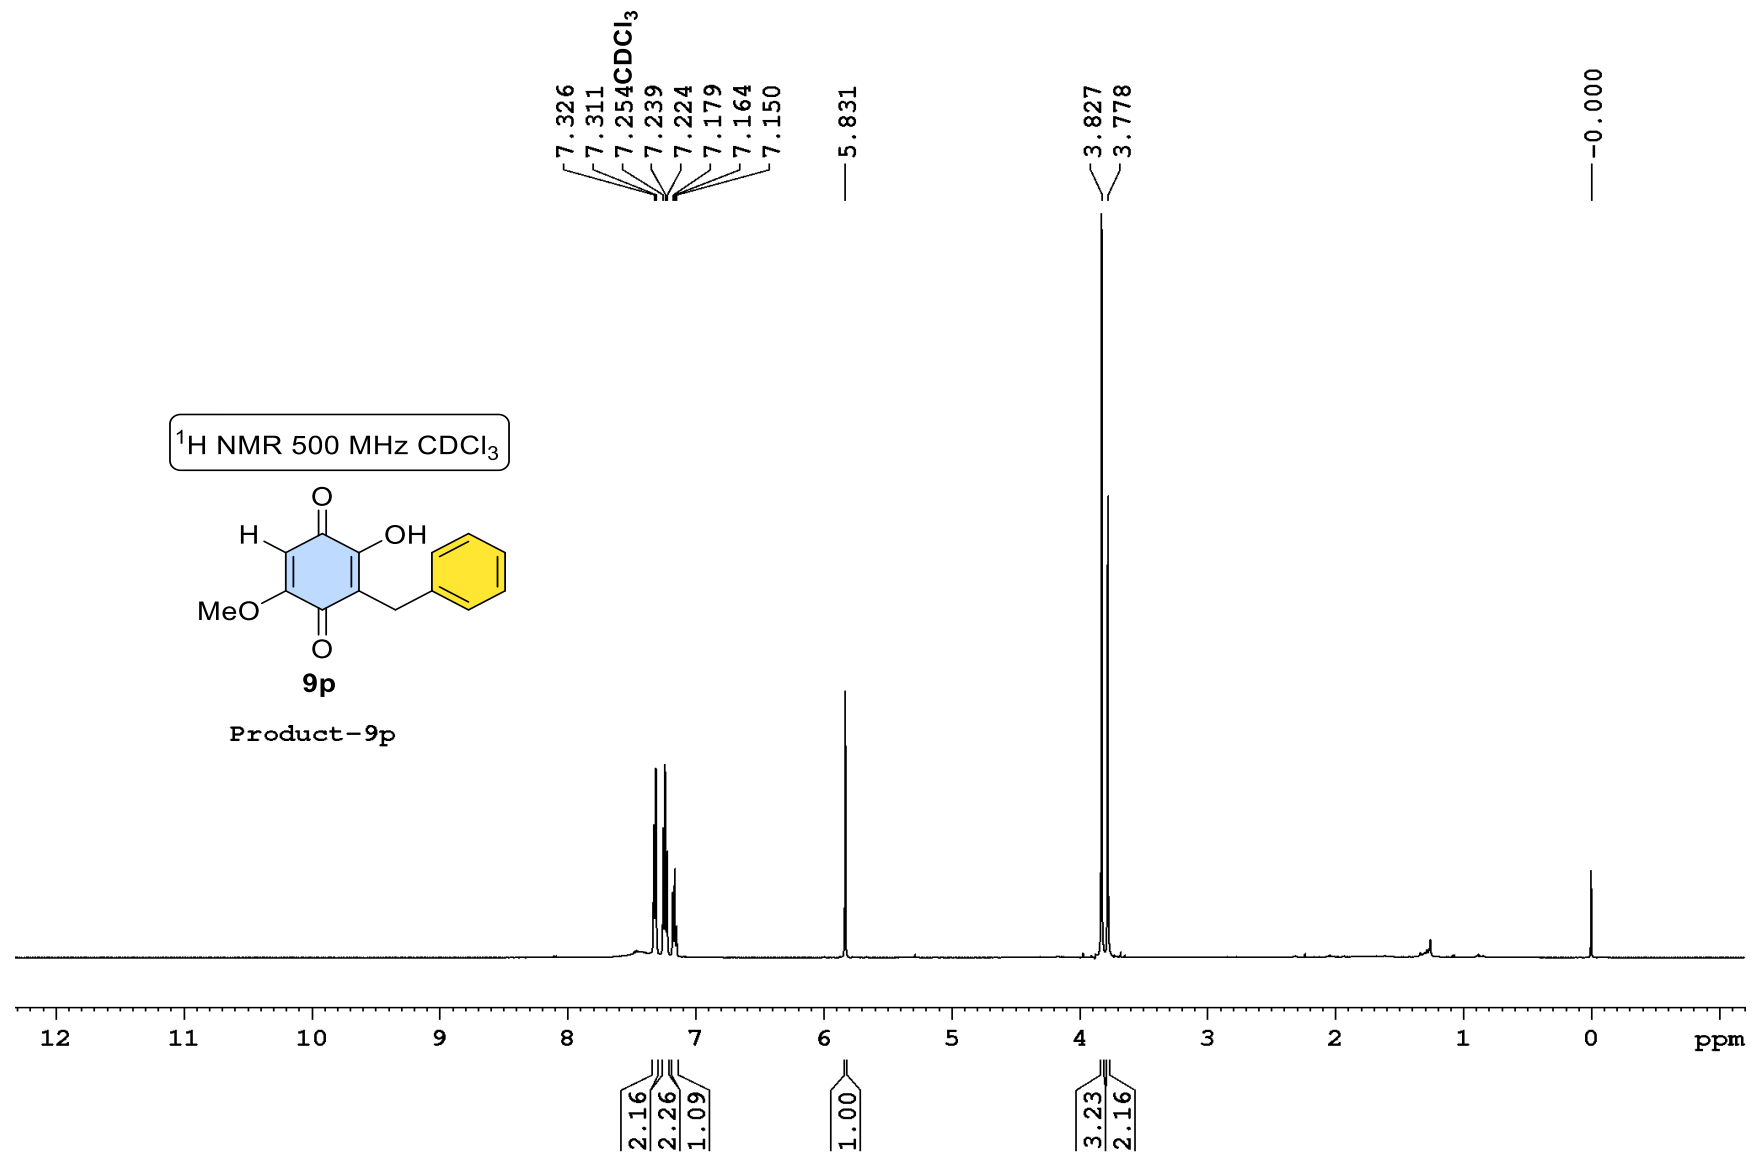

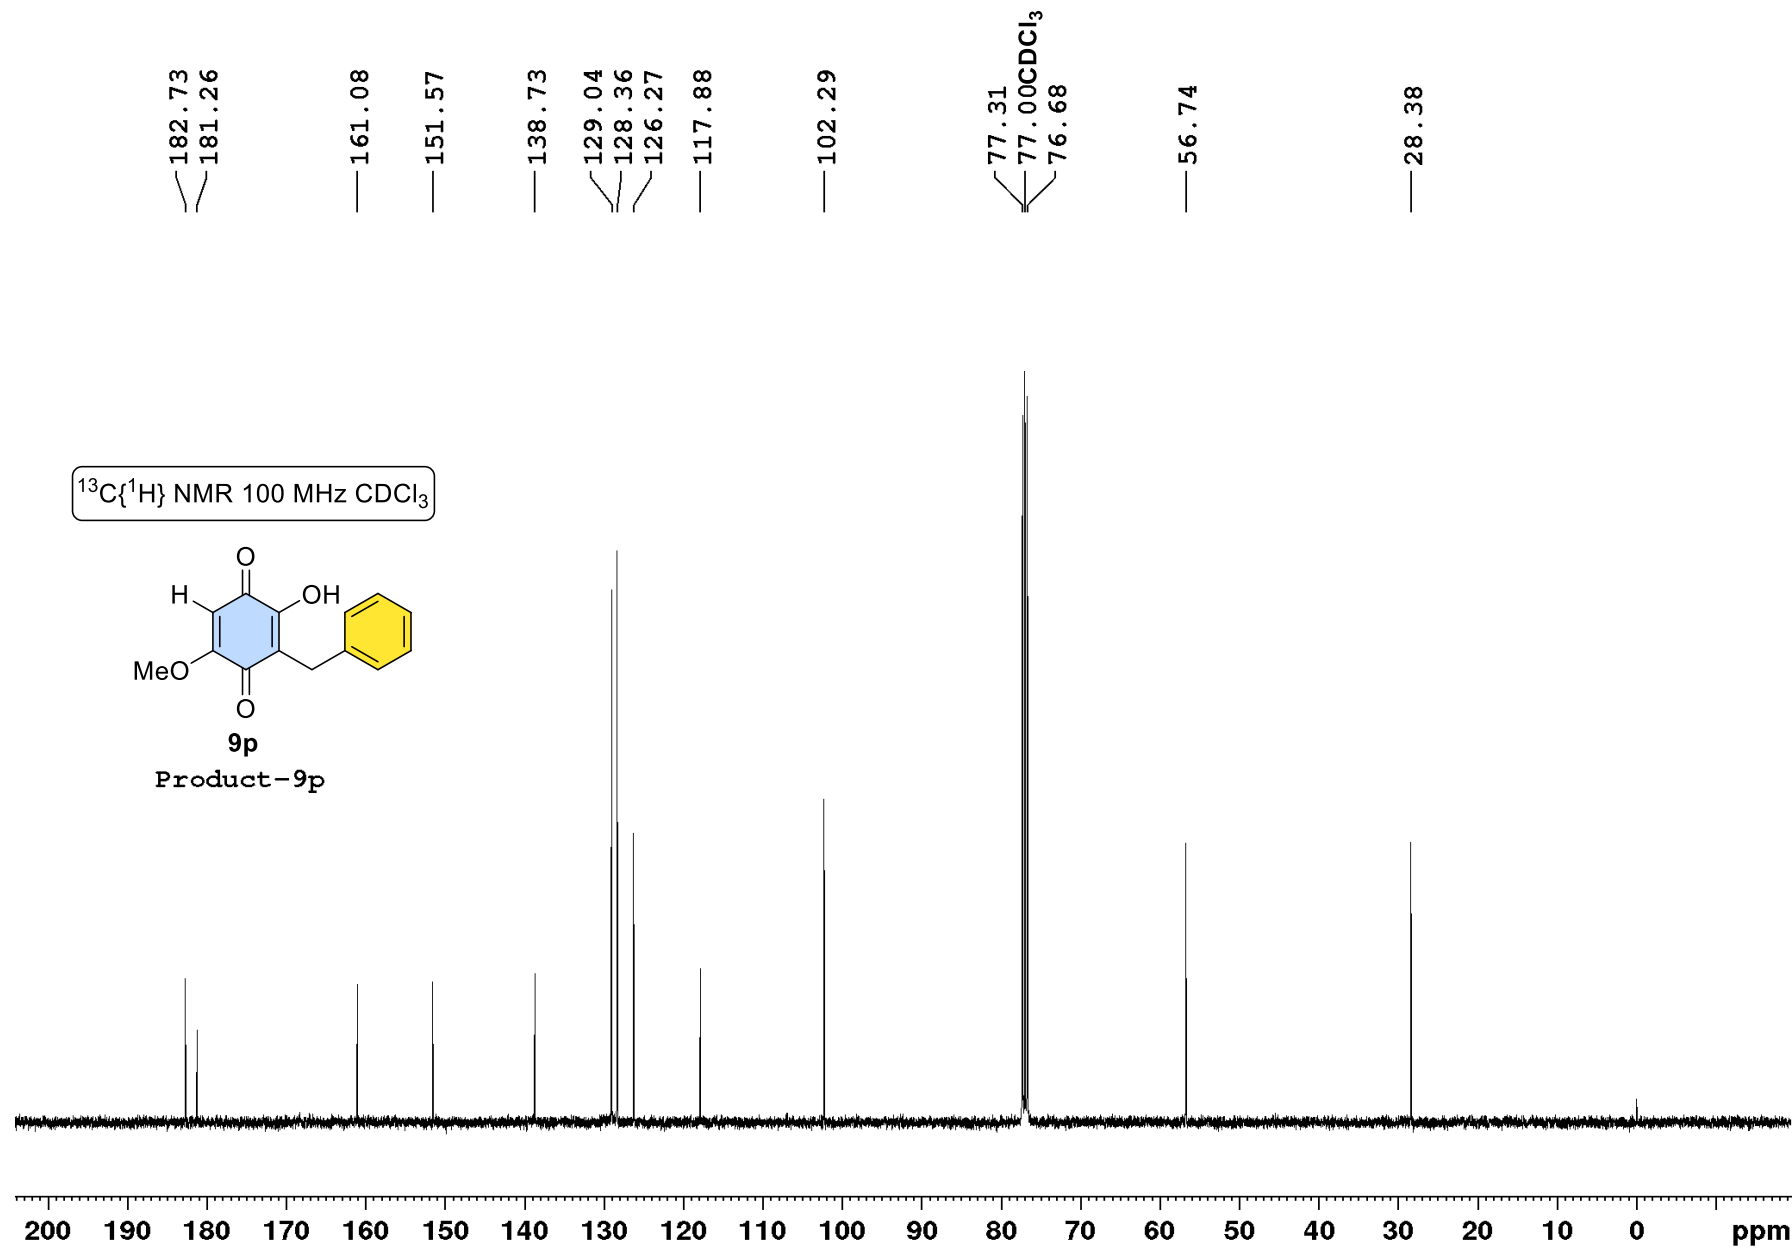

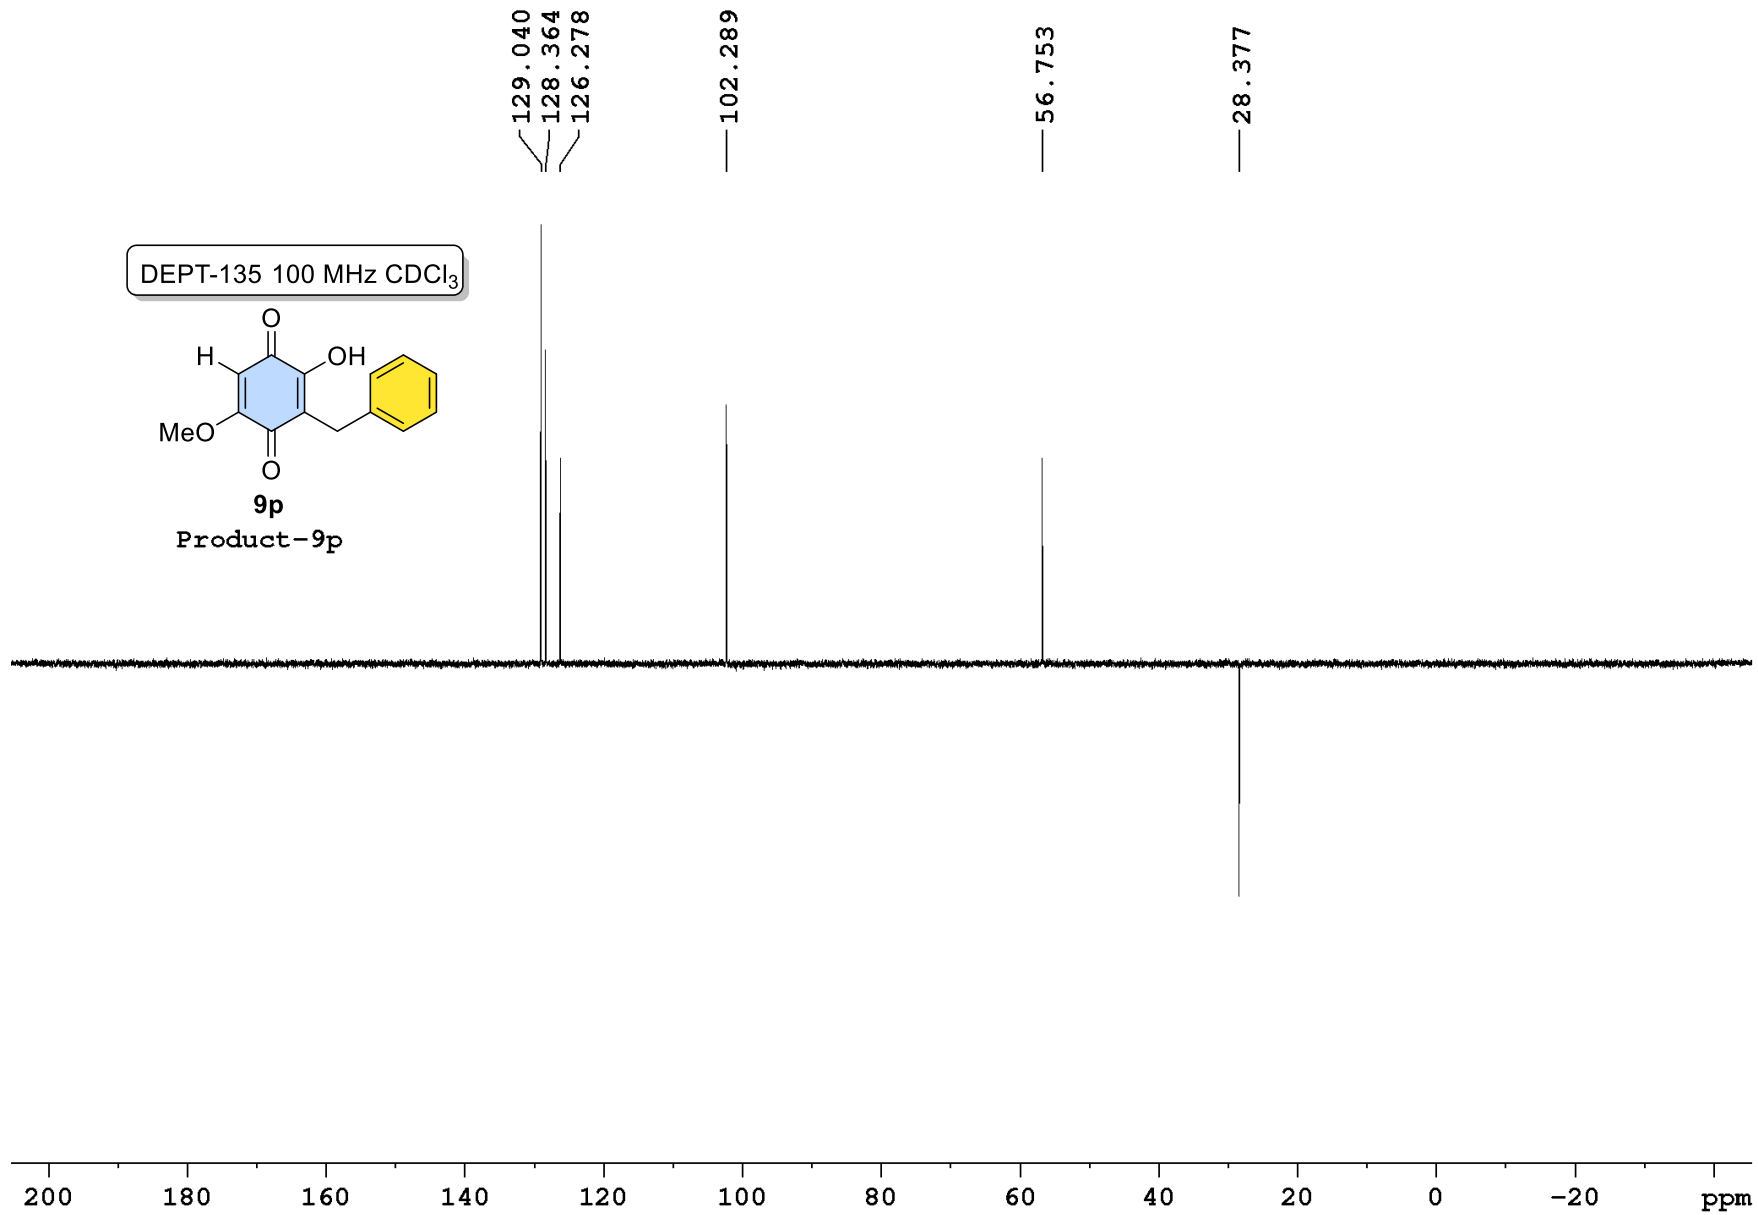

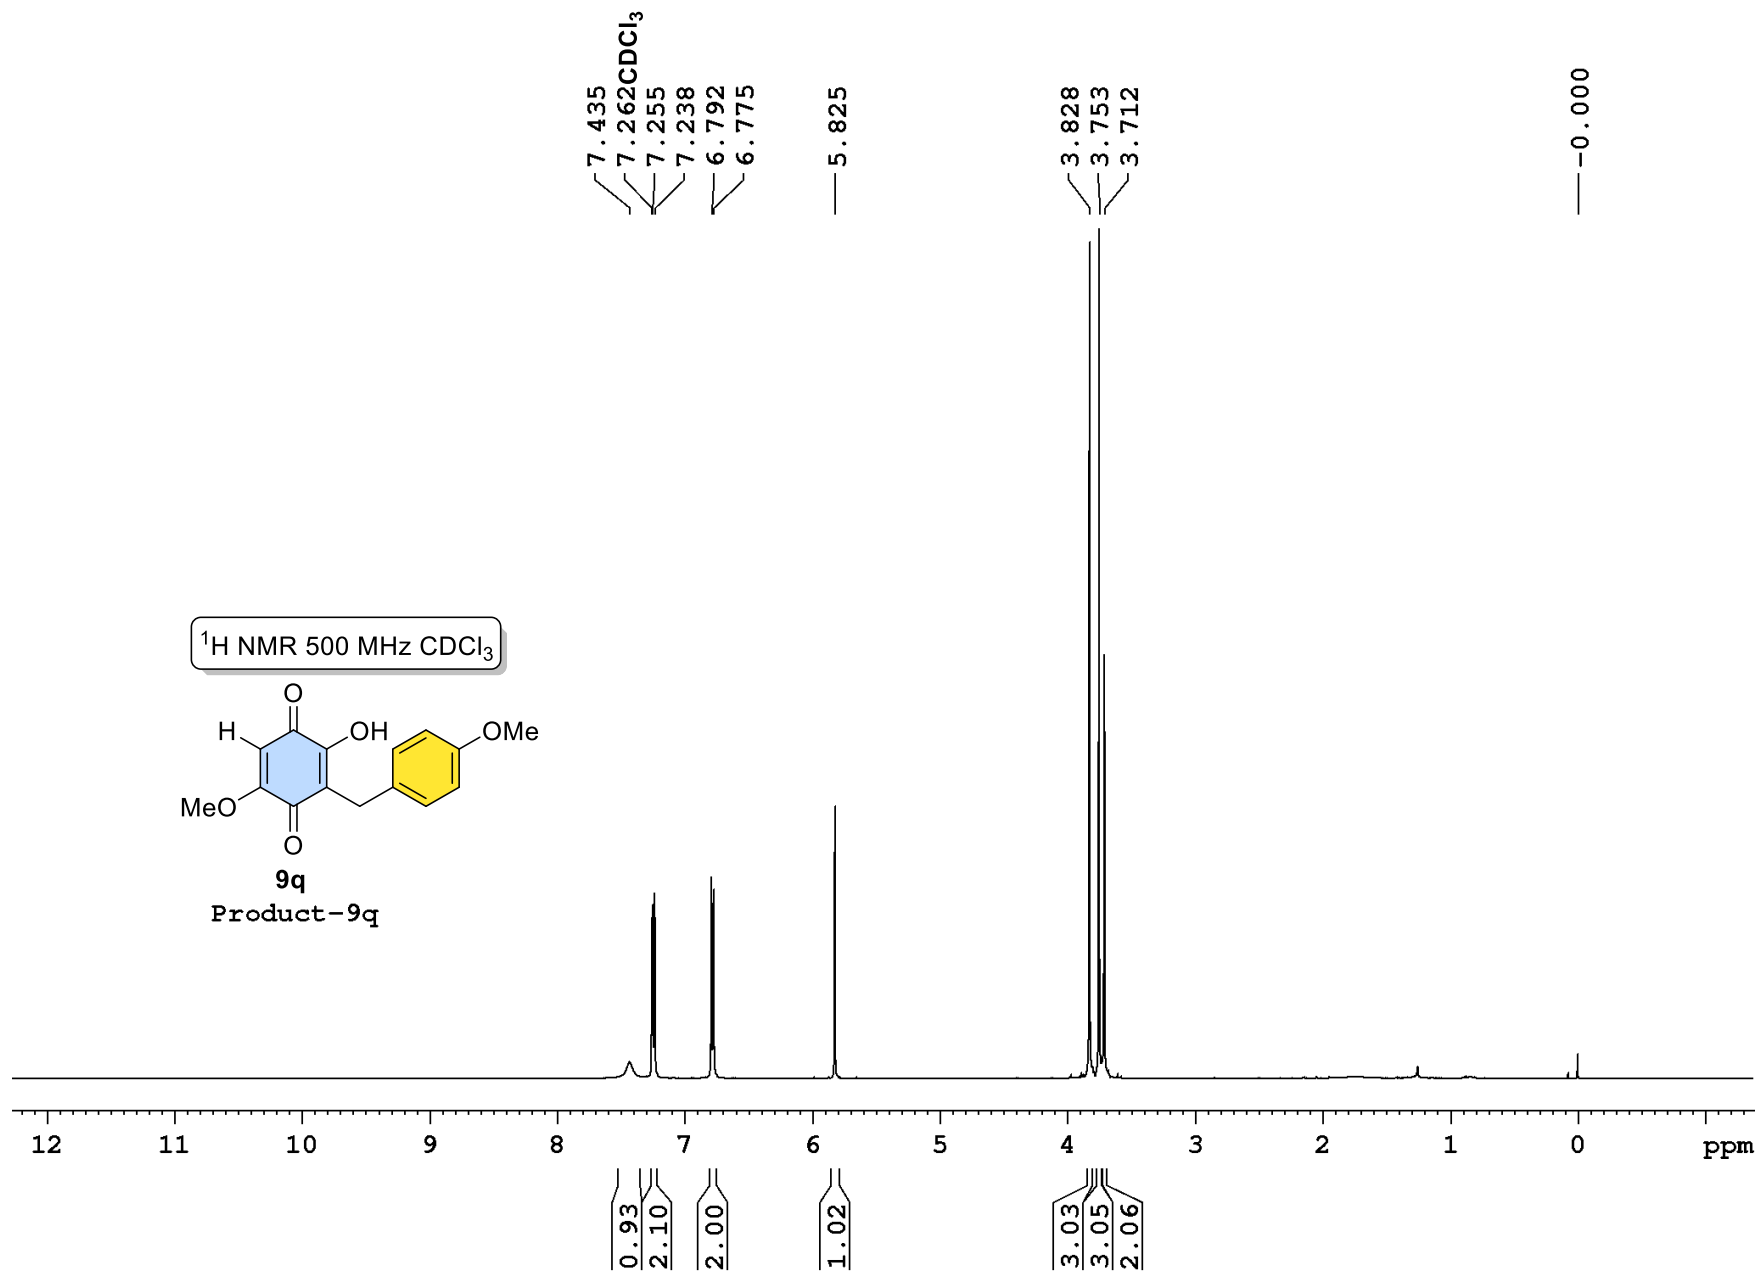

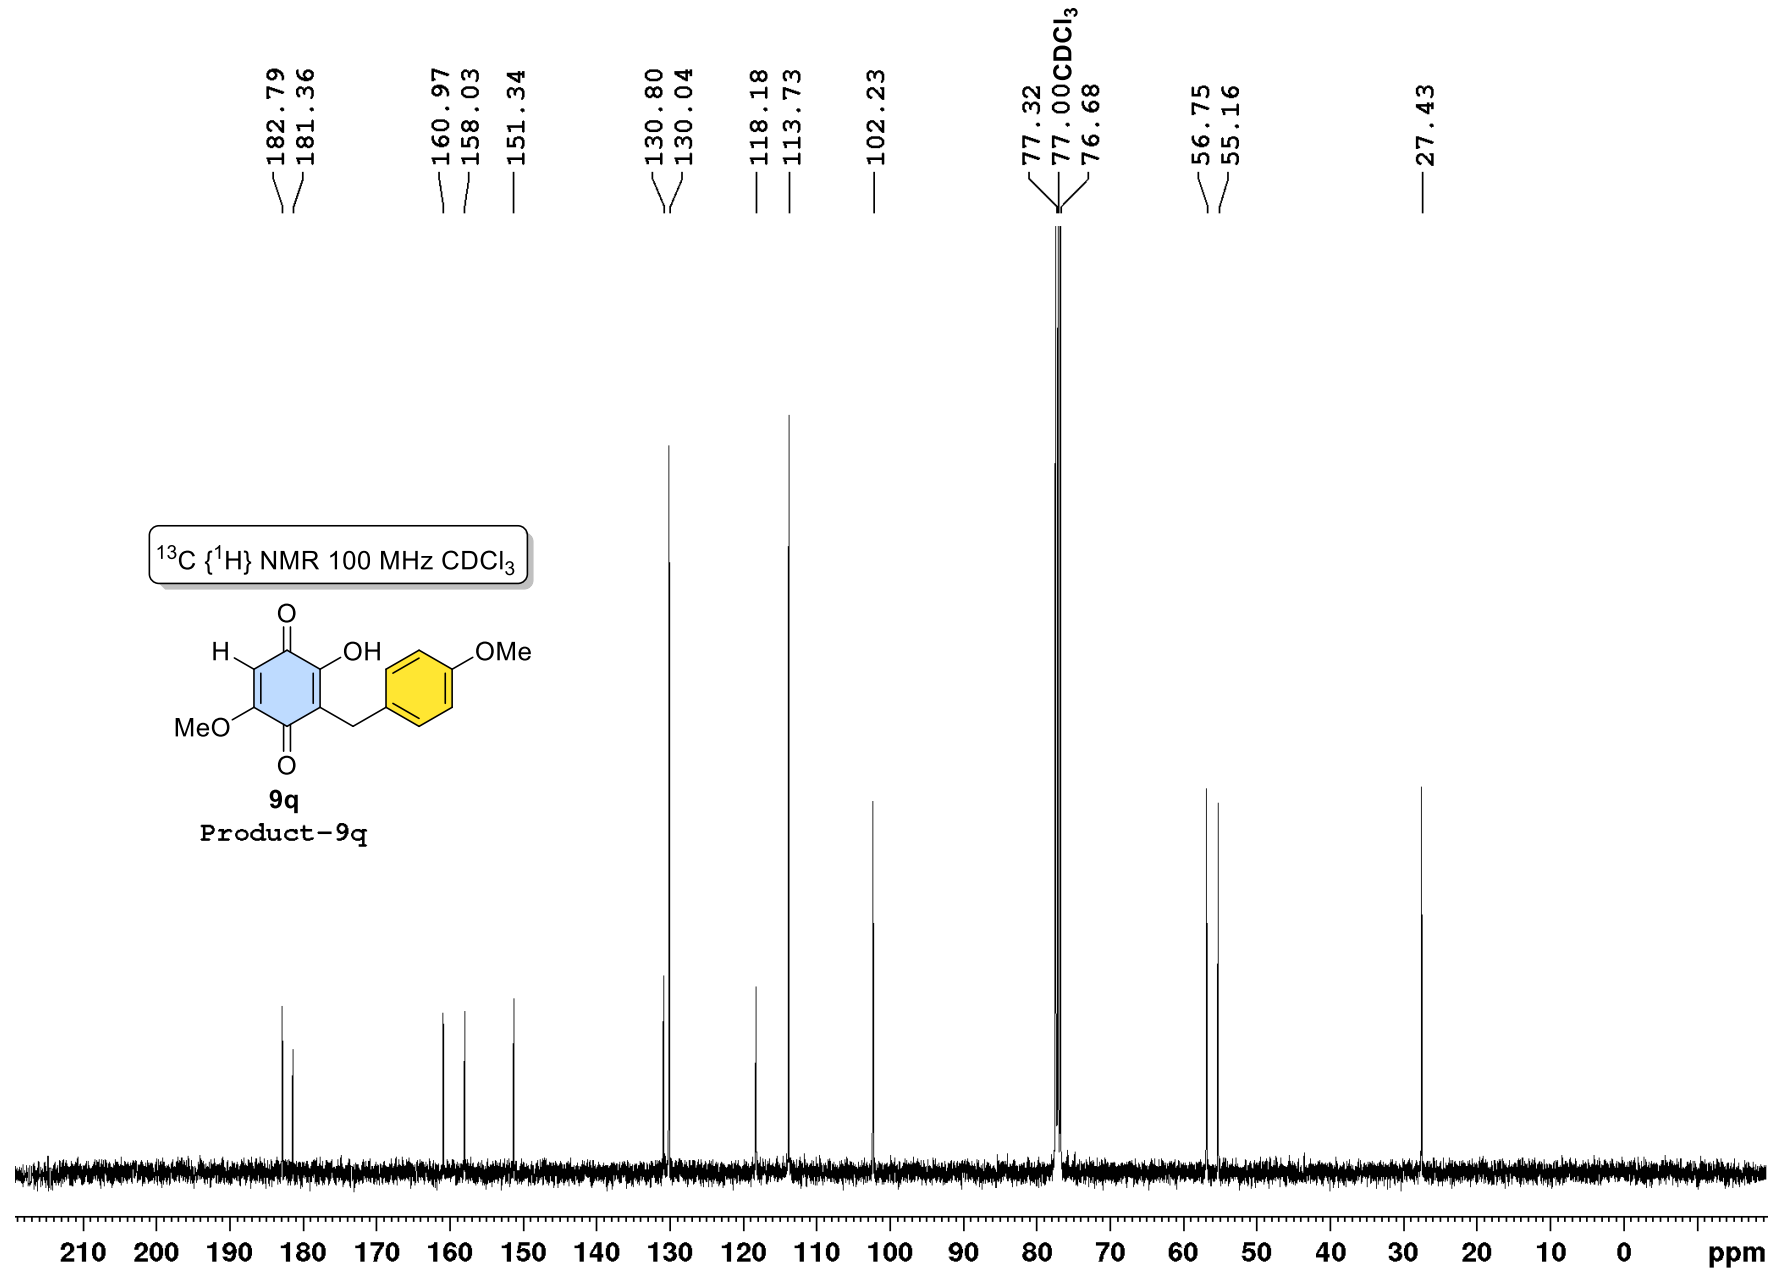

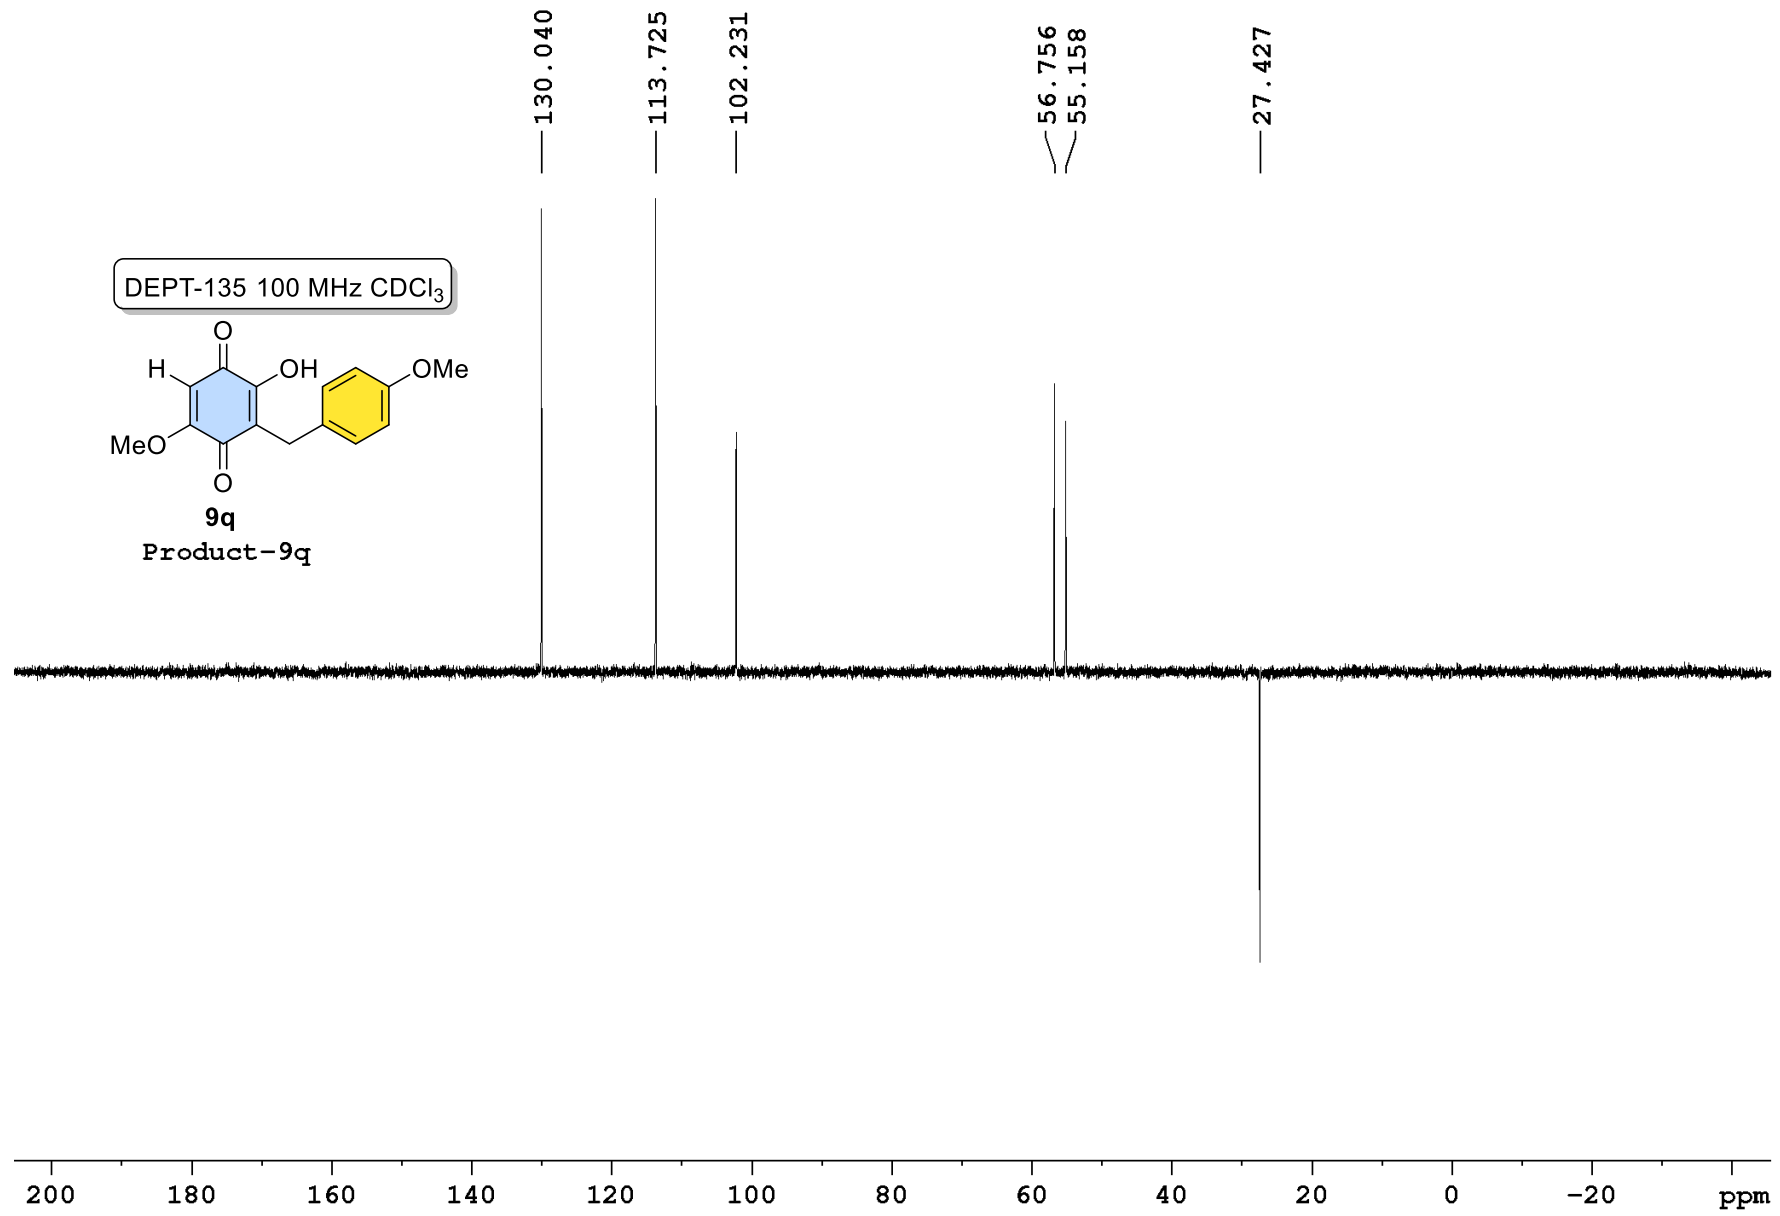

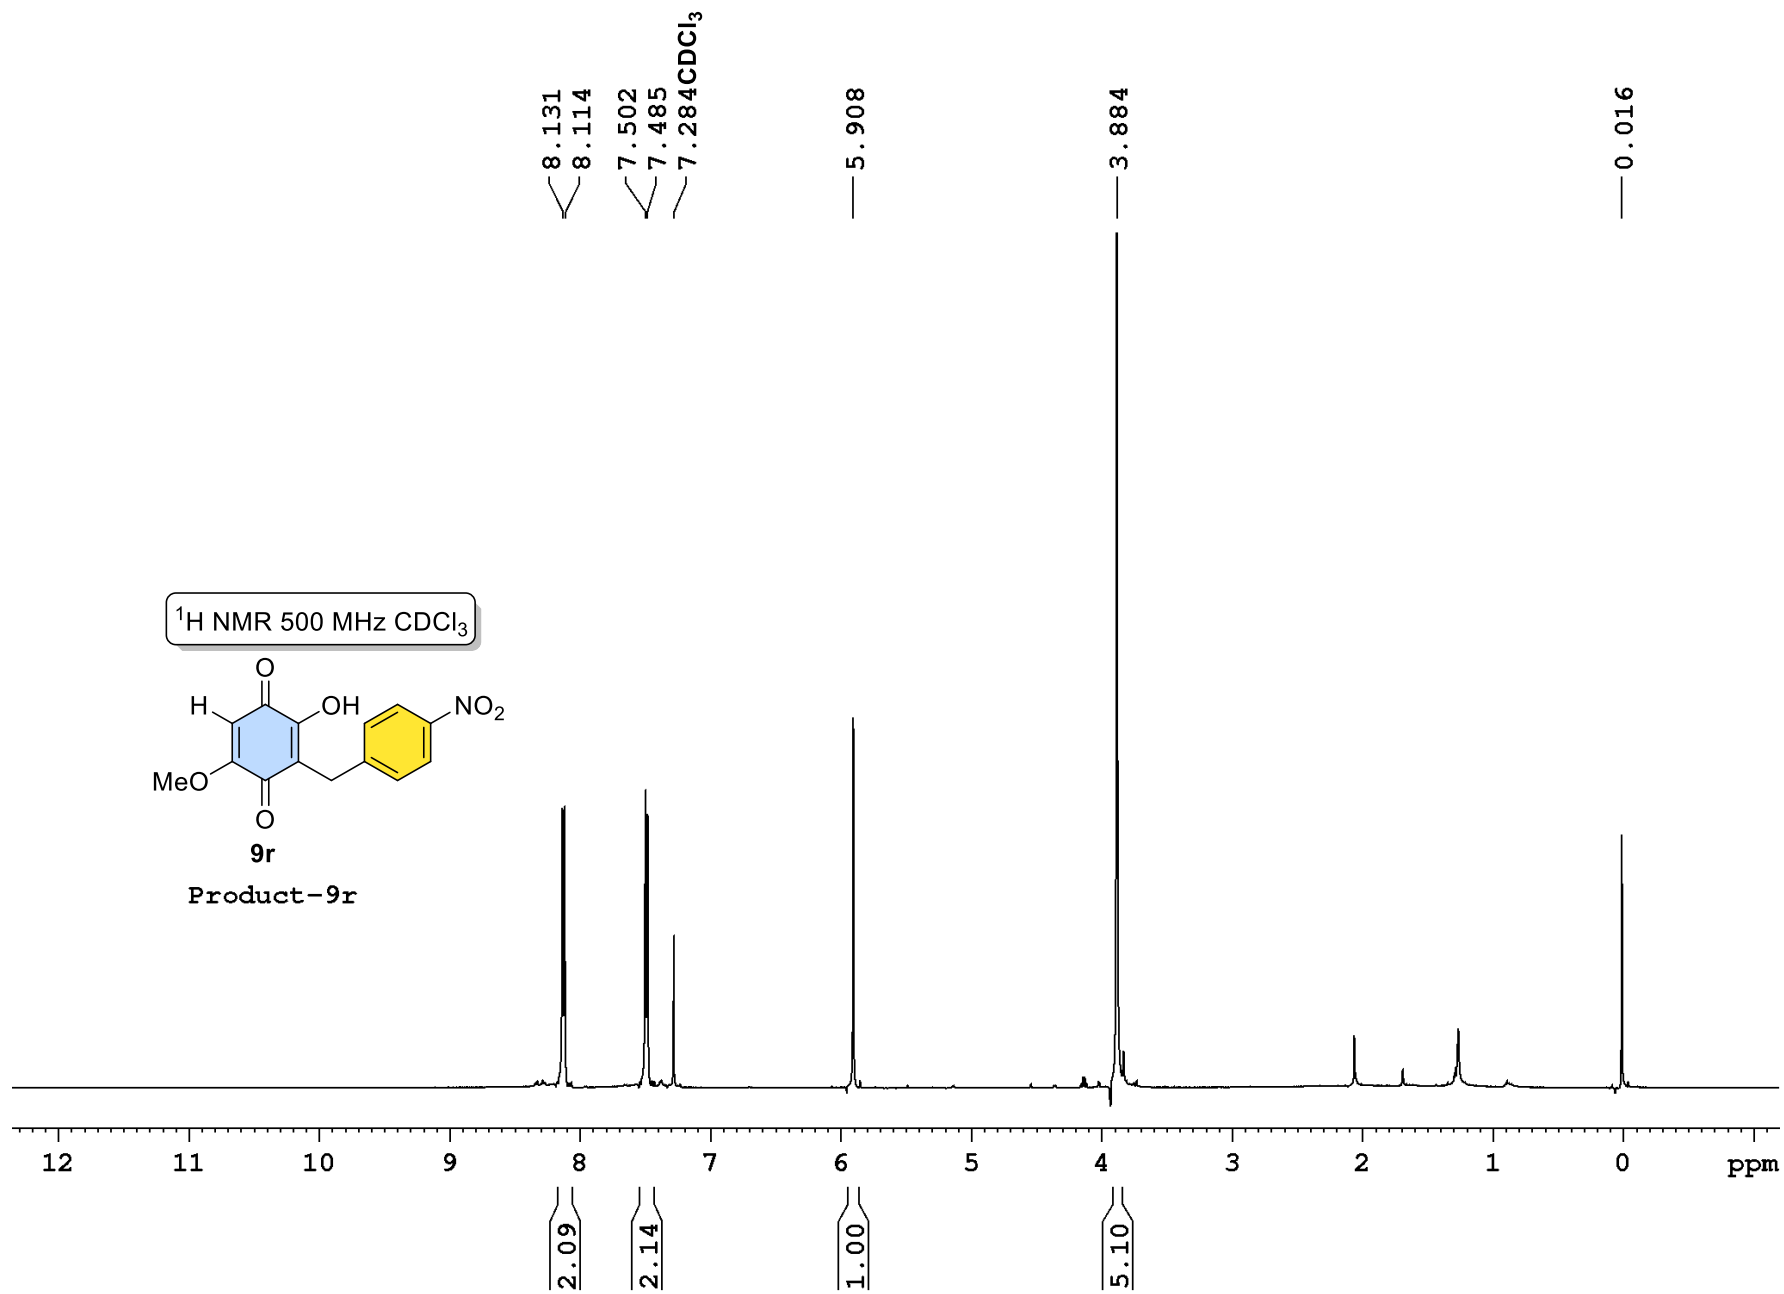



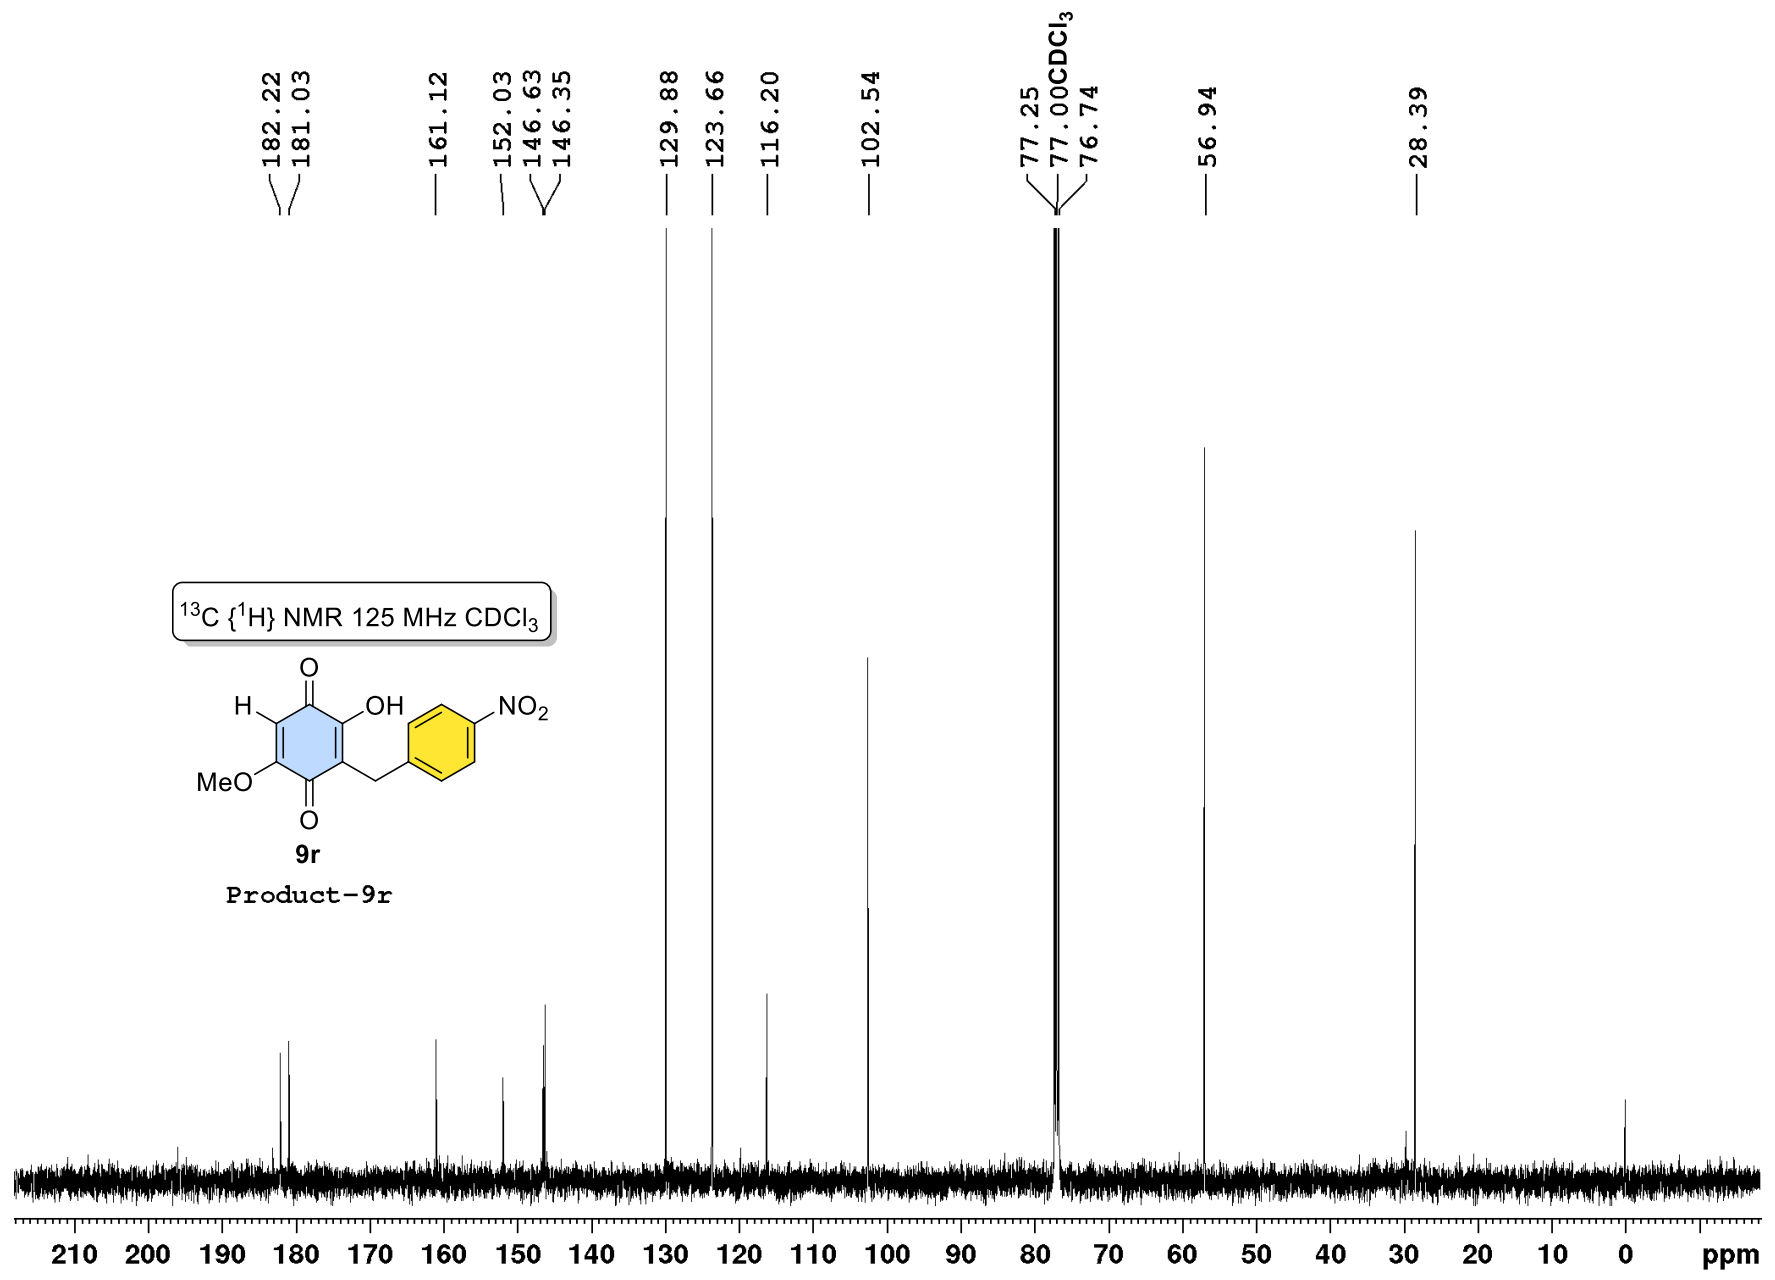

DEPT-135 125 MHz CDCl<sub>3</sub>

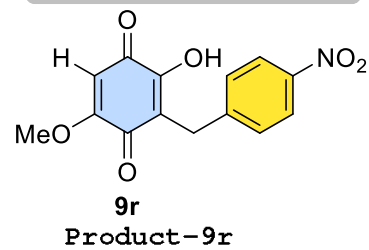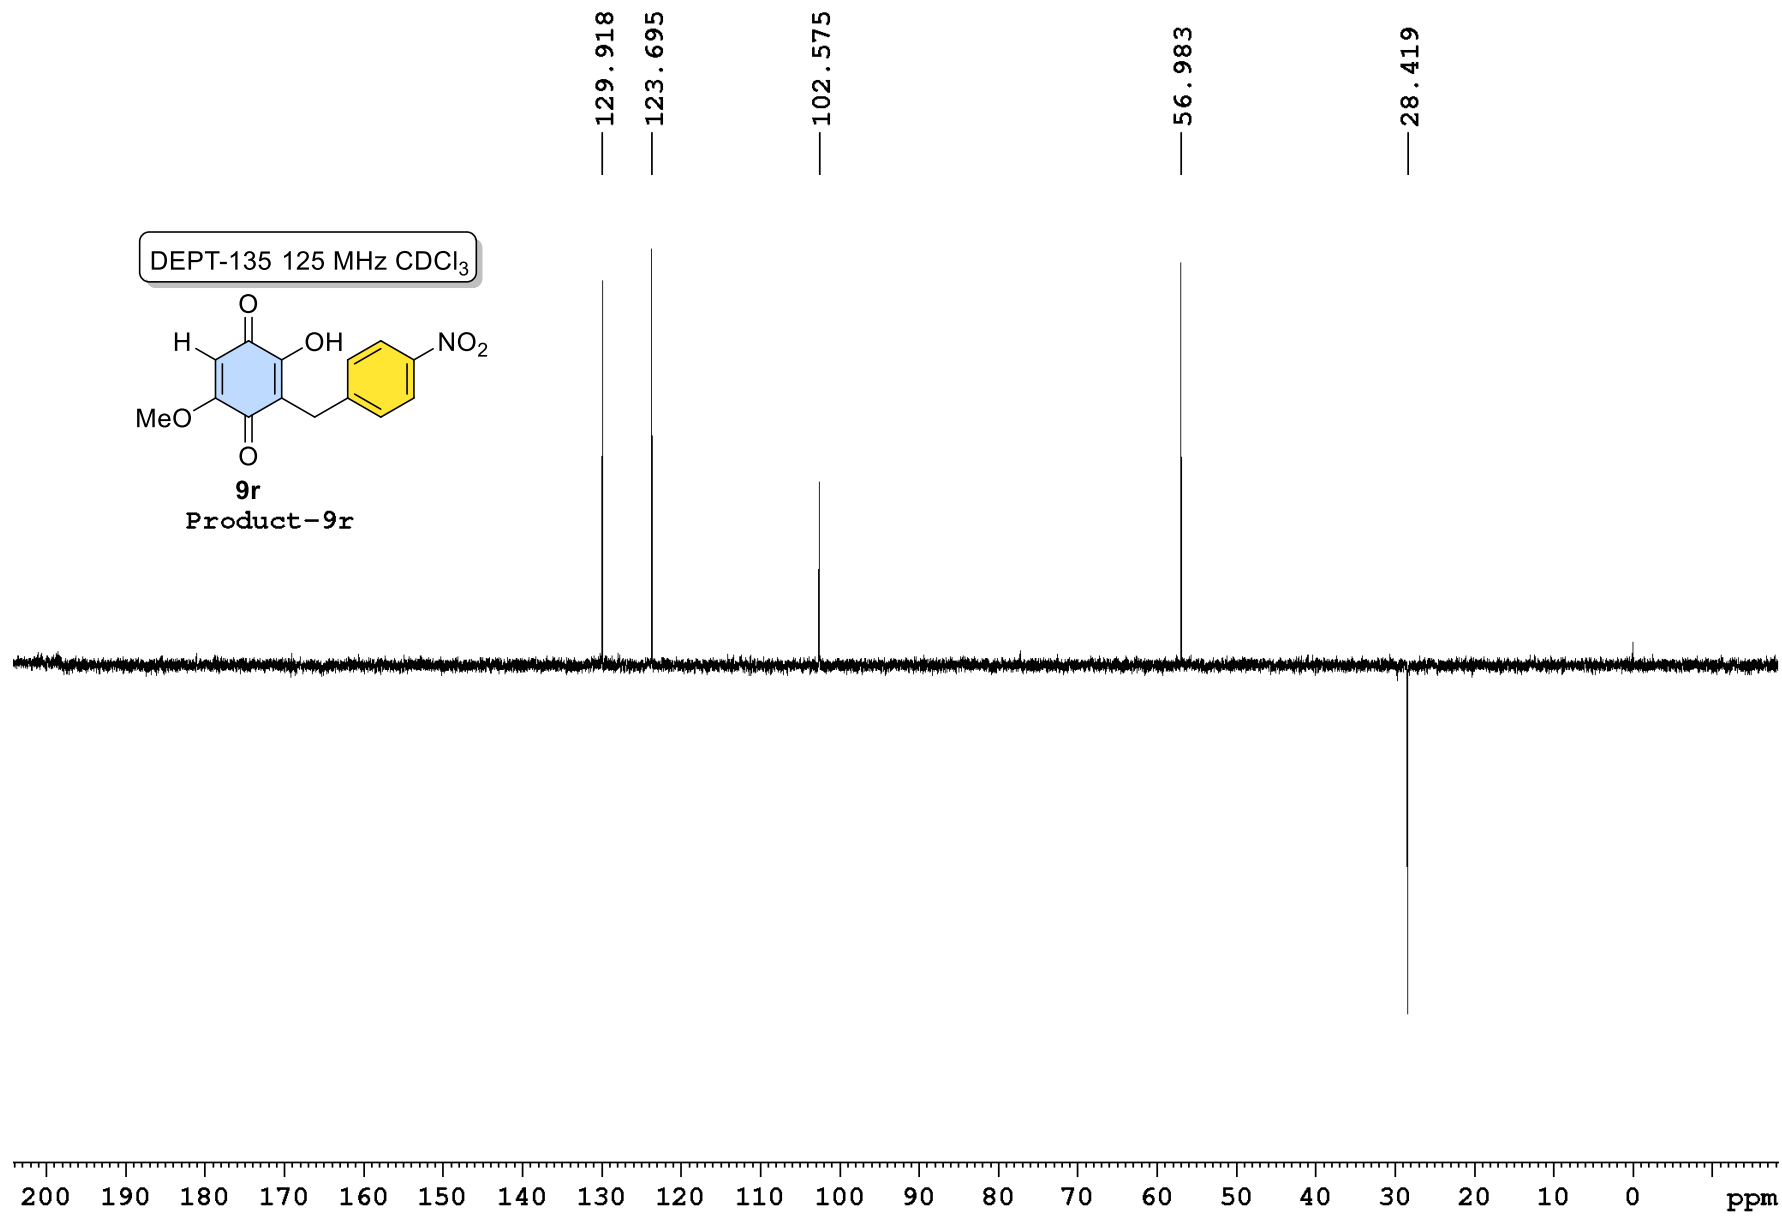

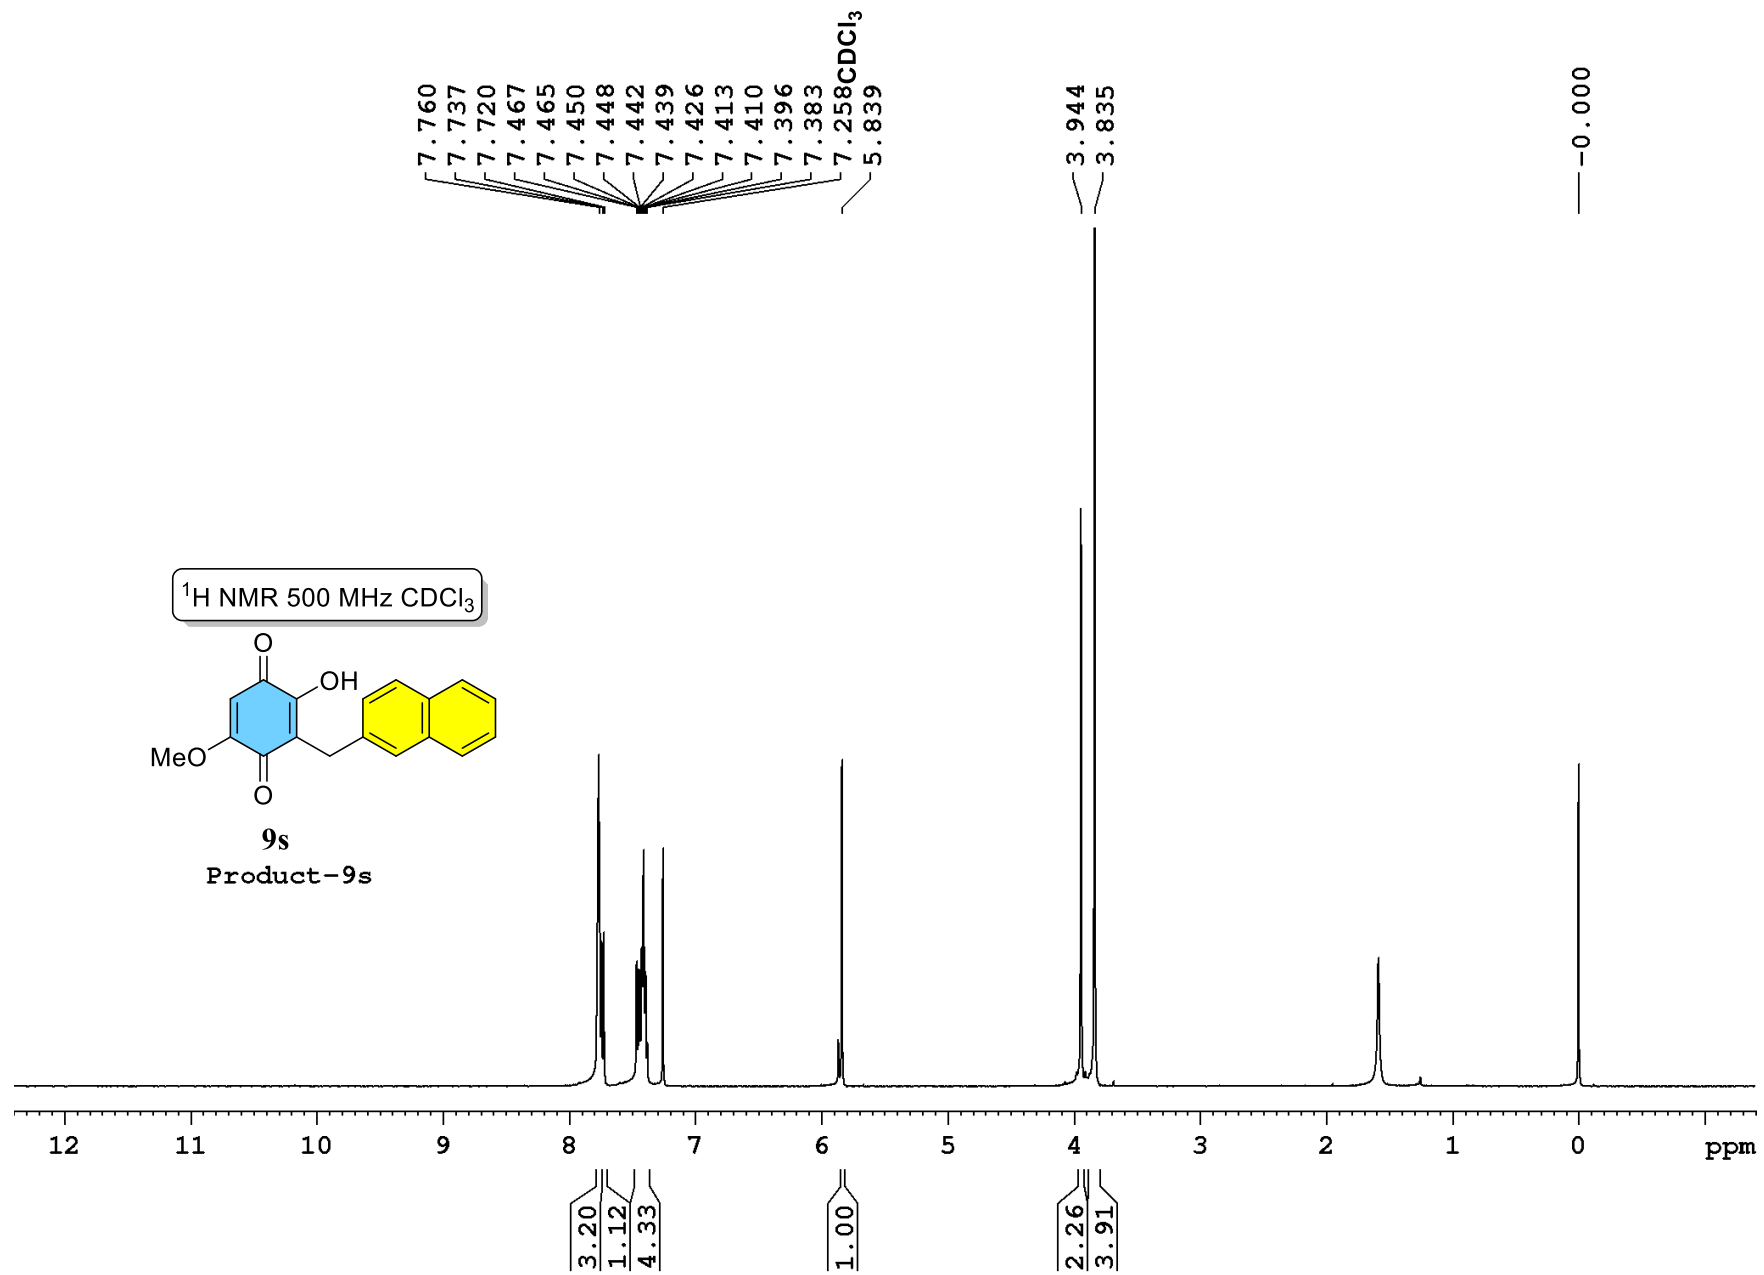

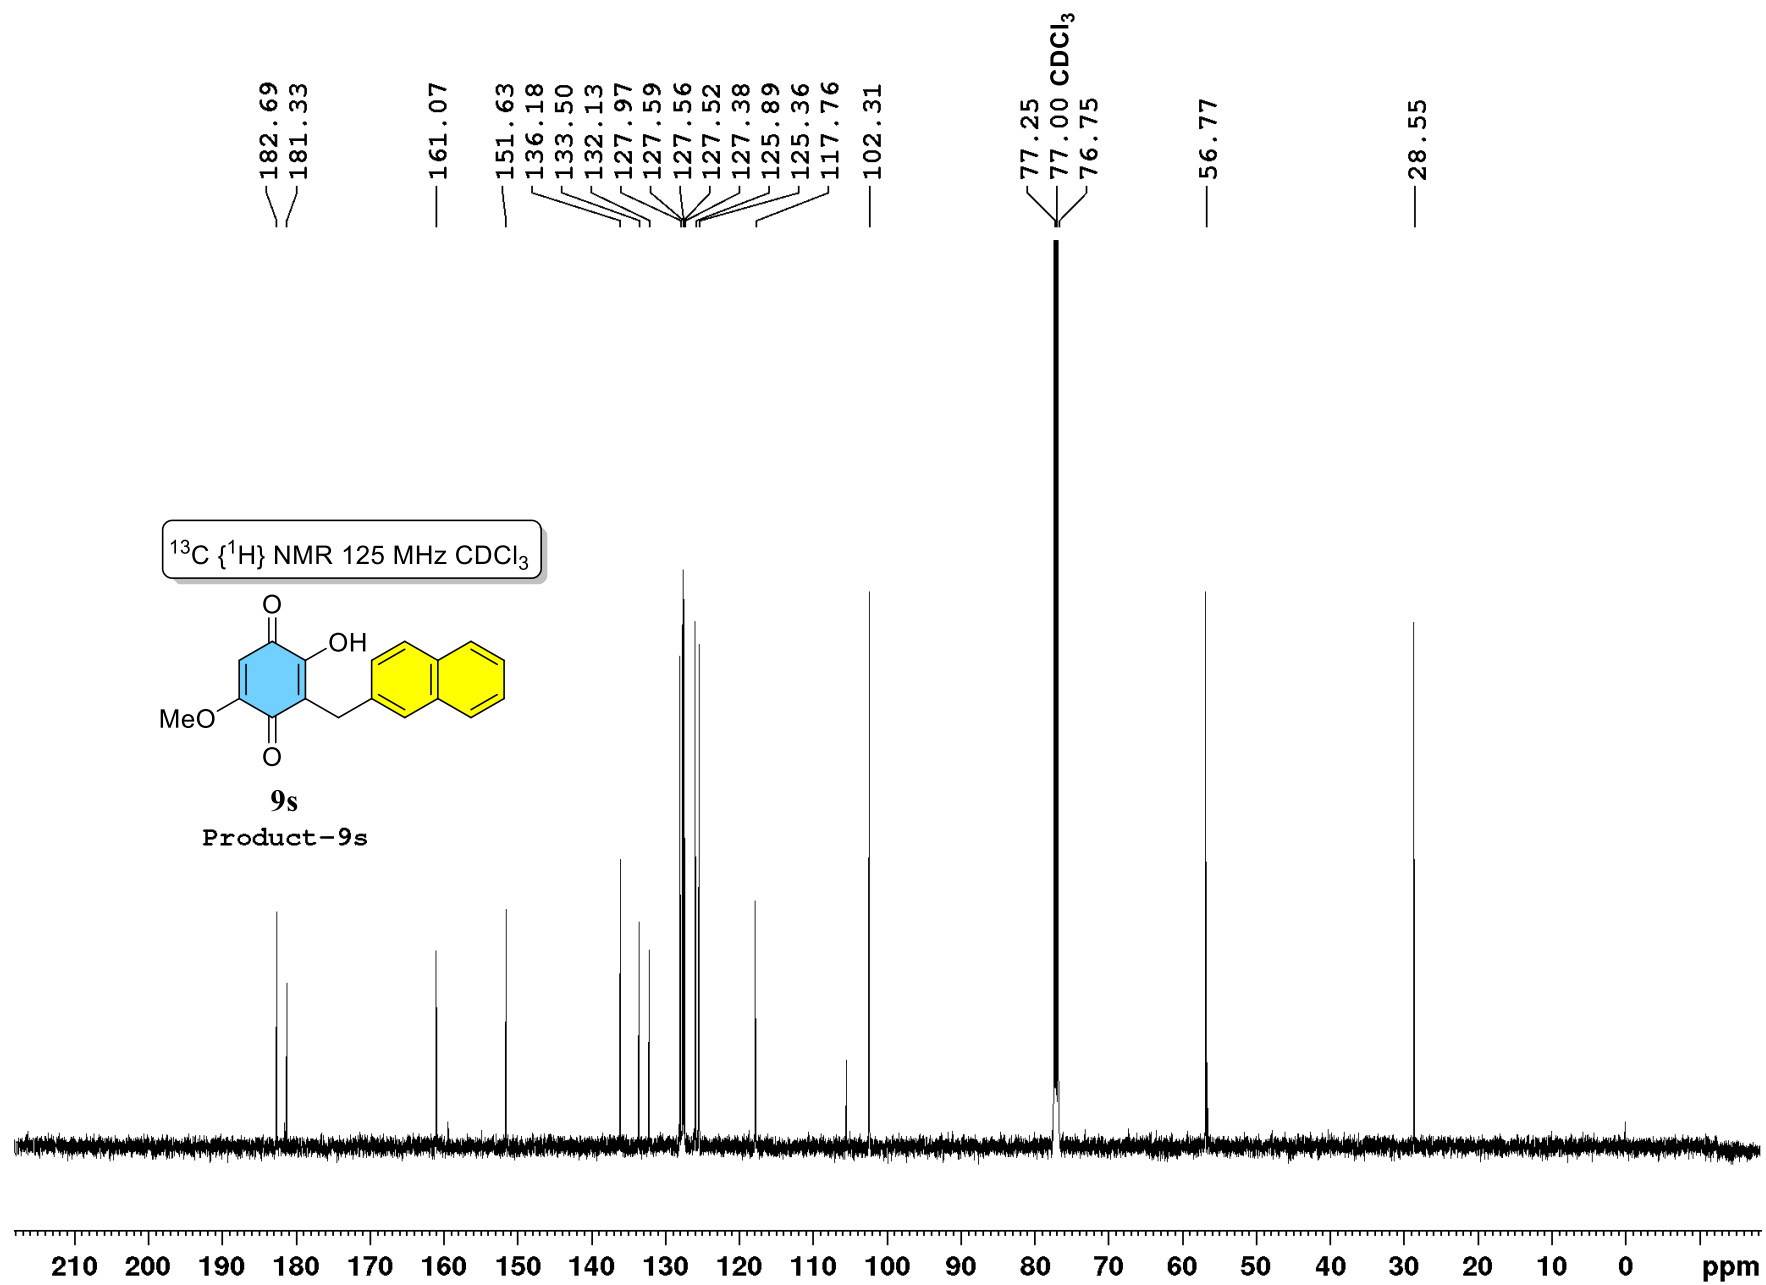

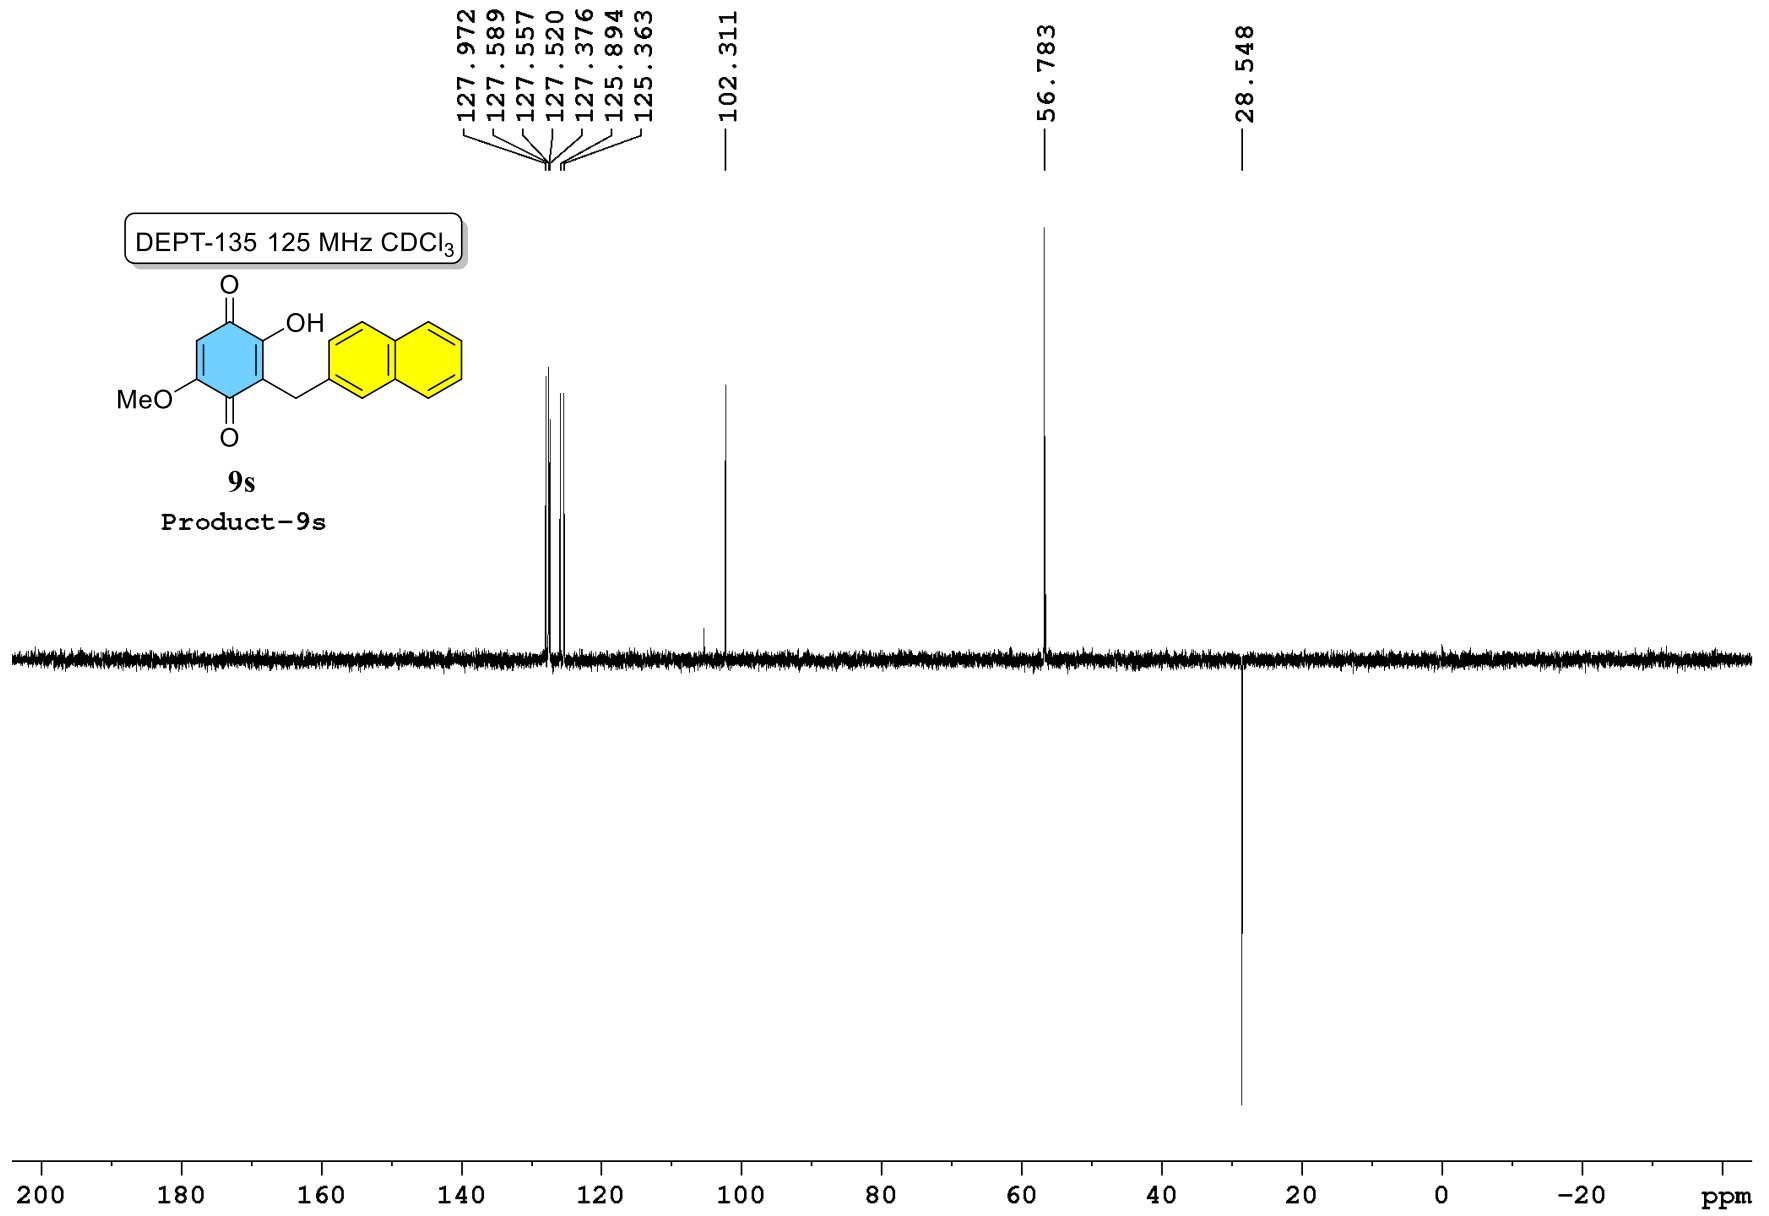

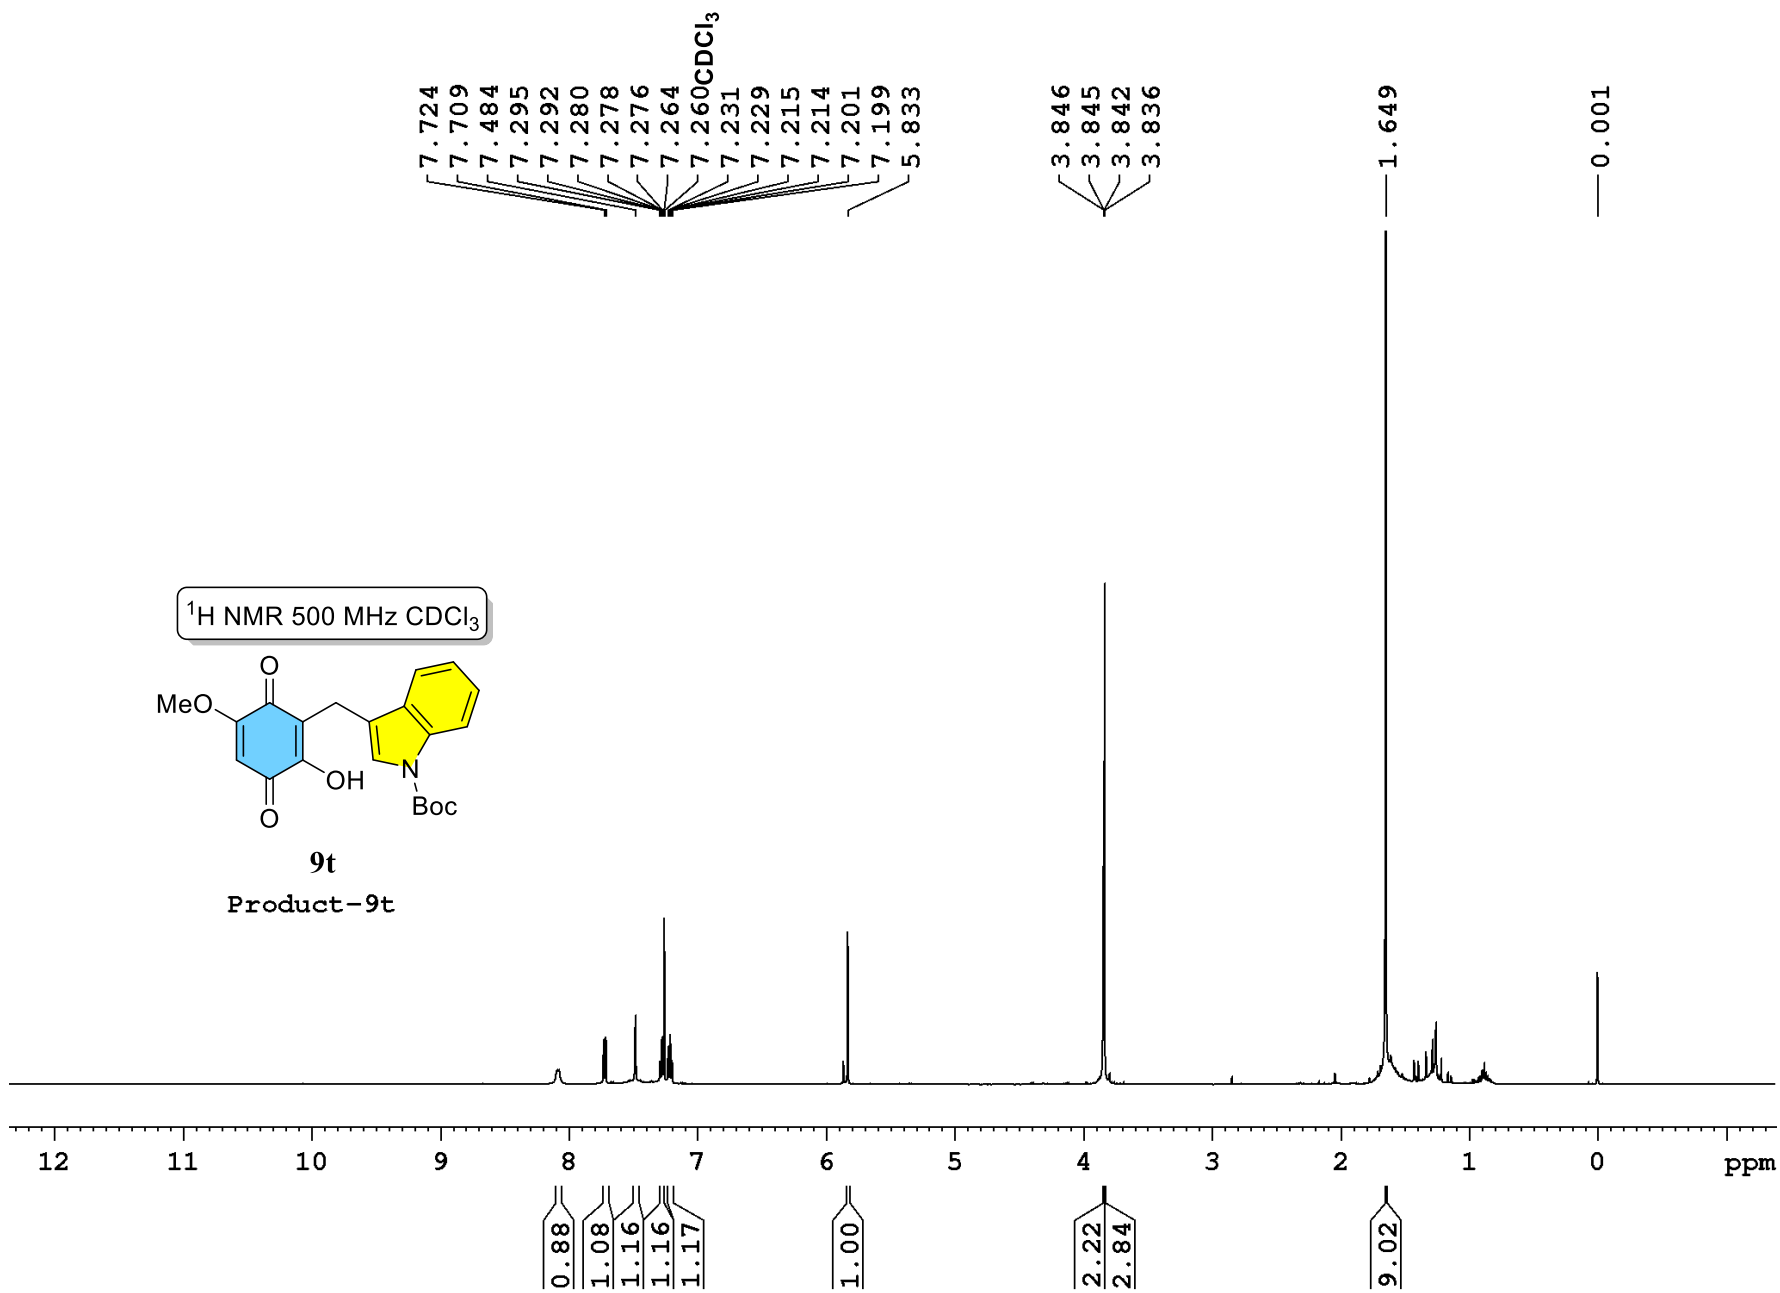

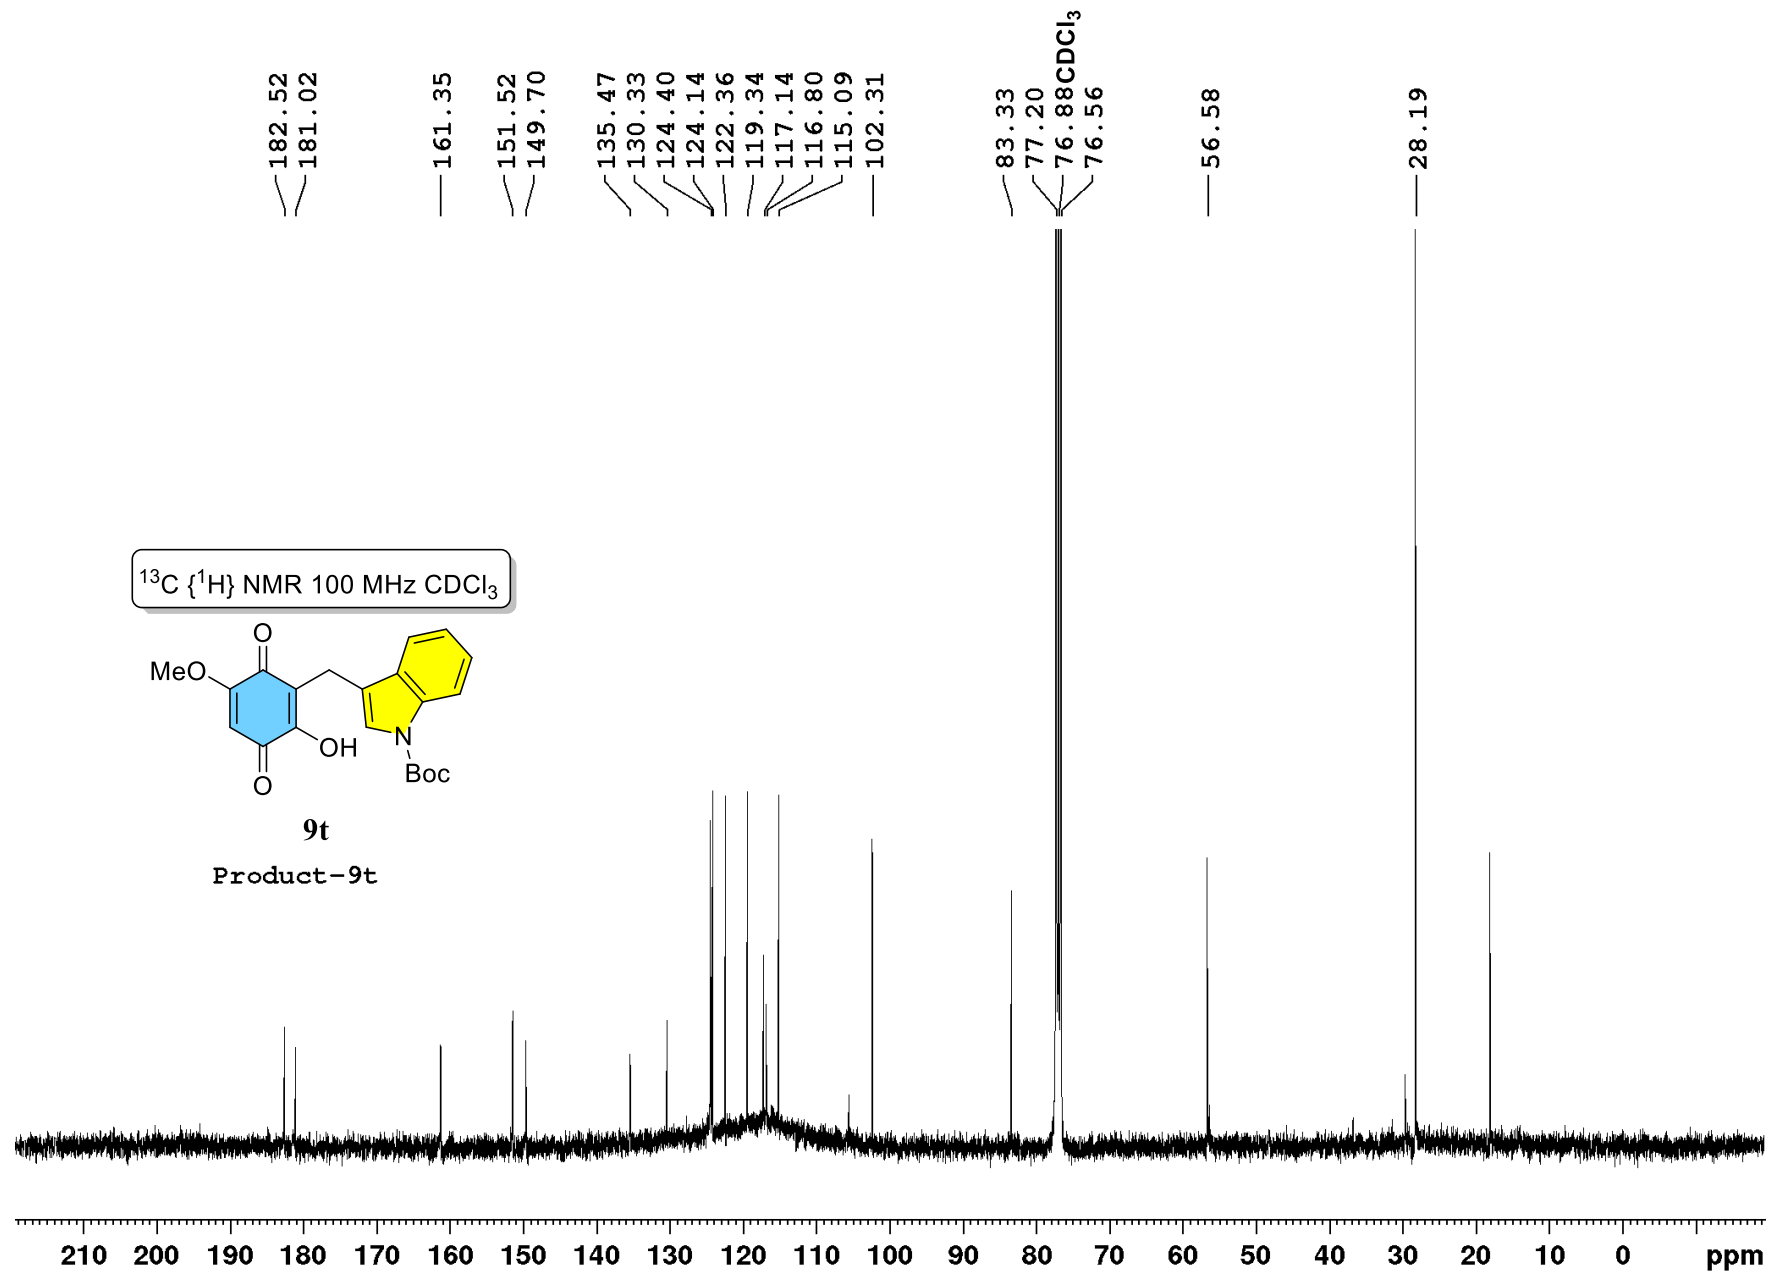

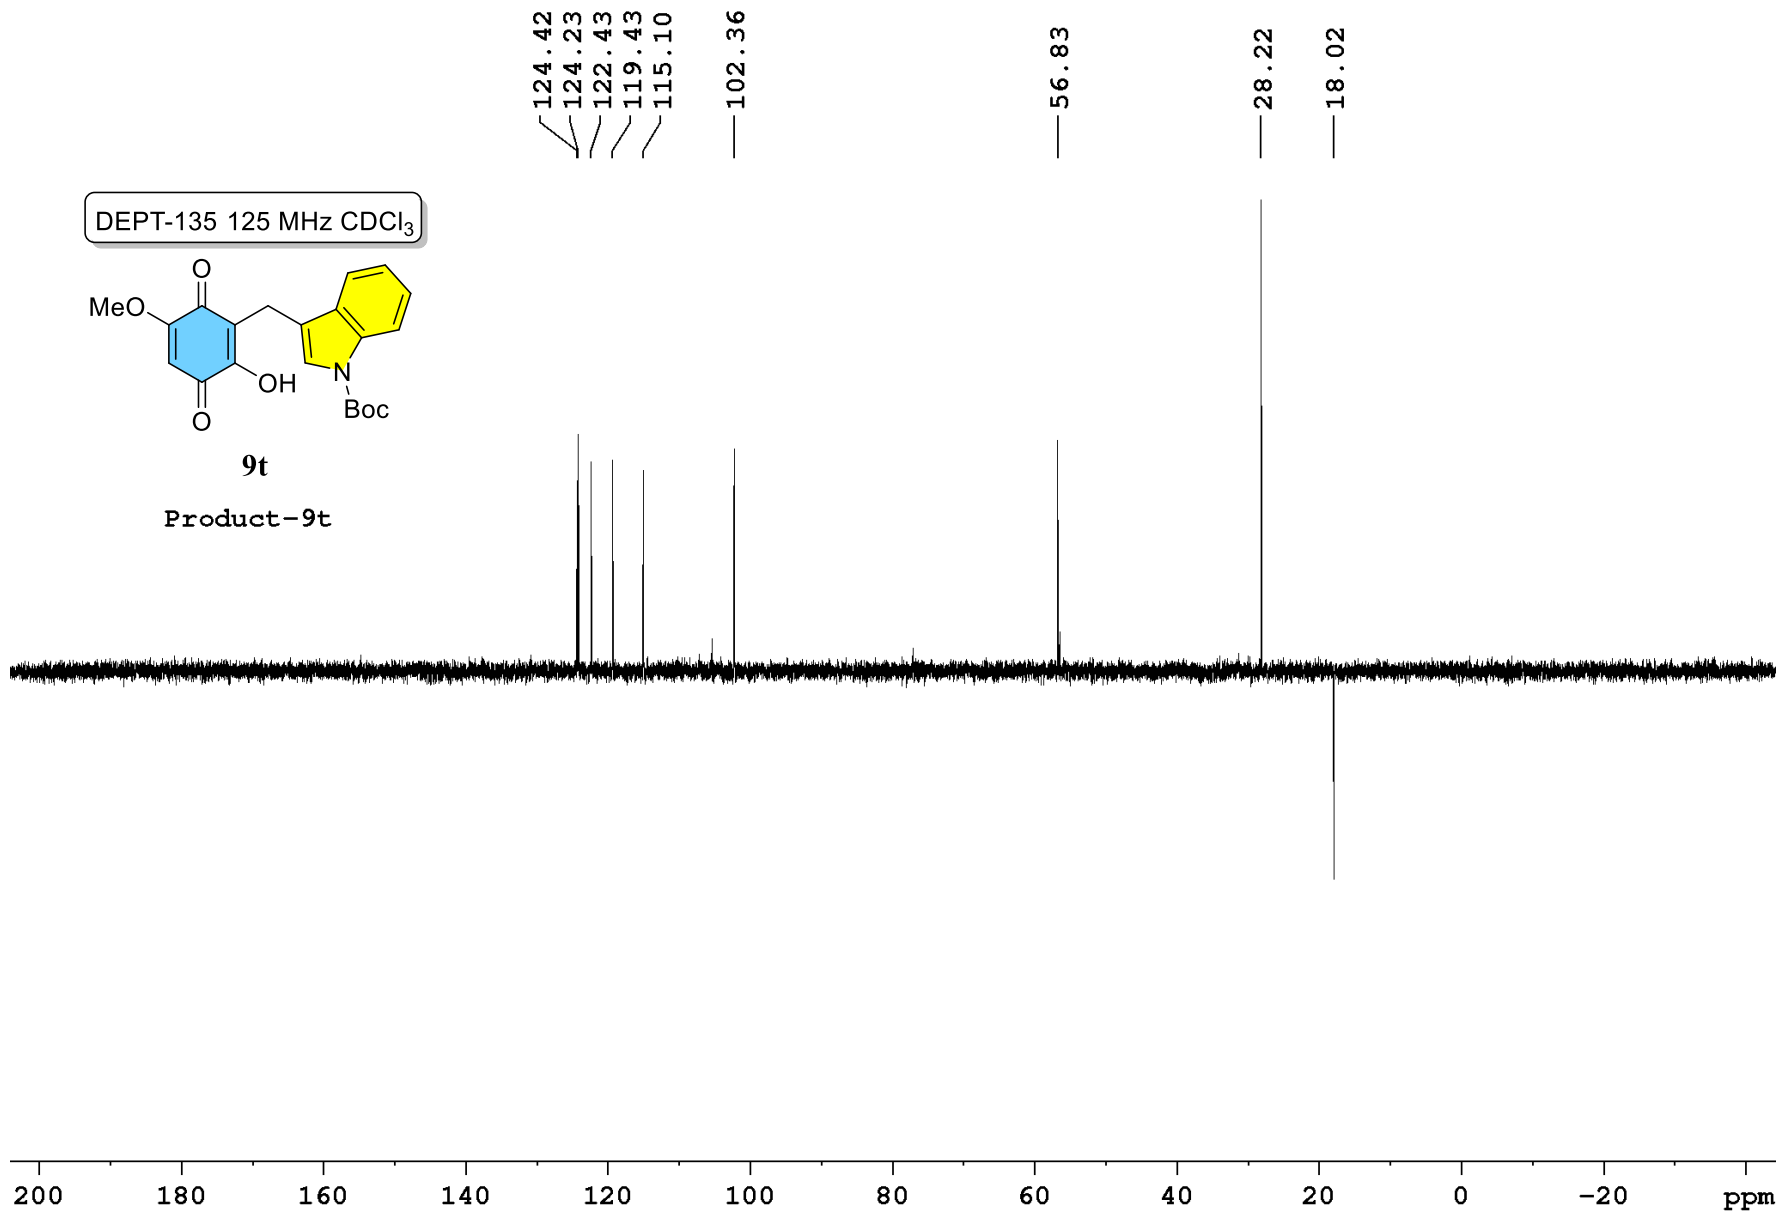



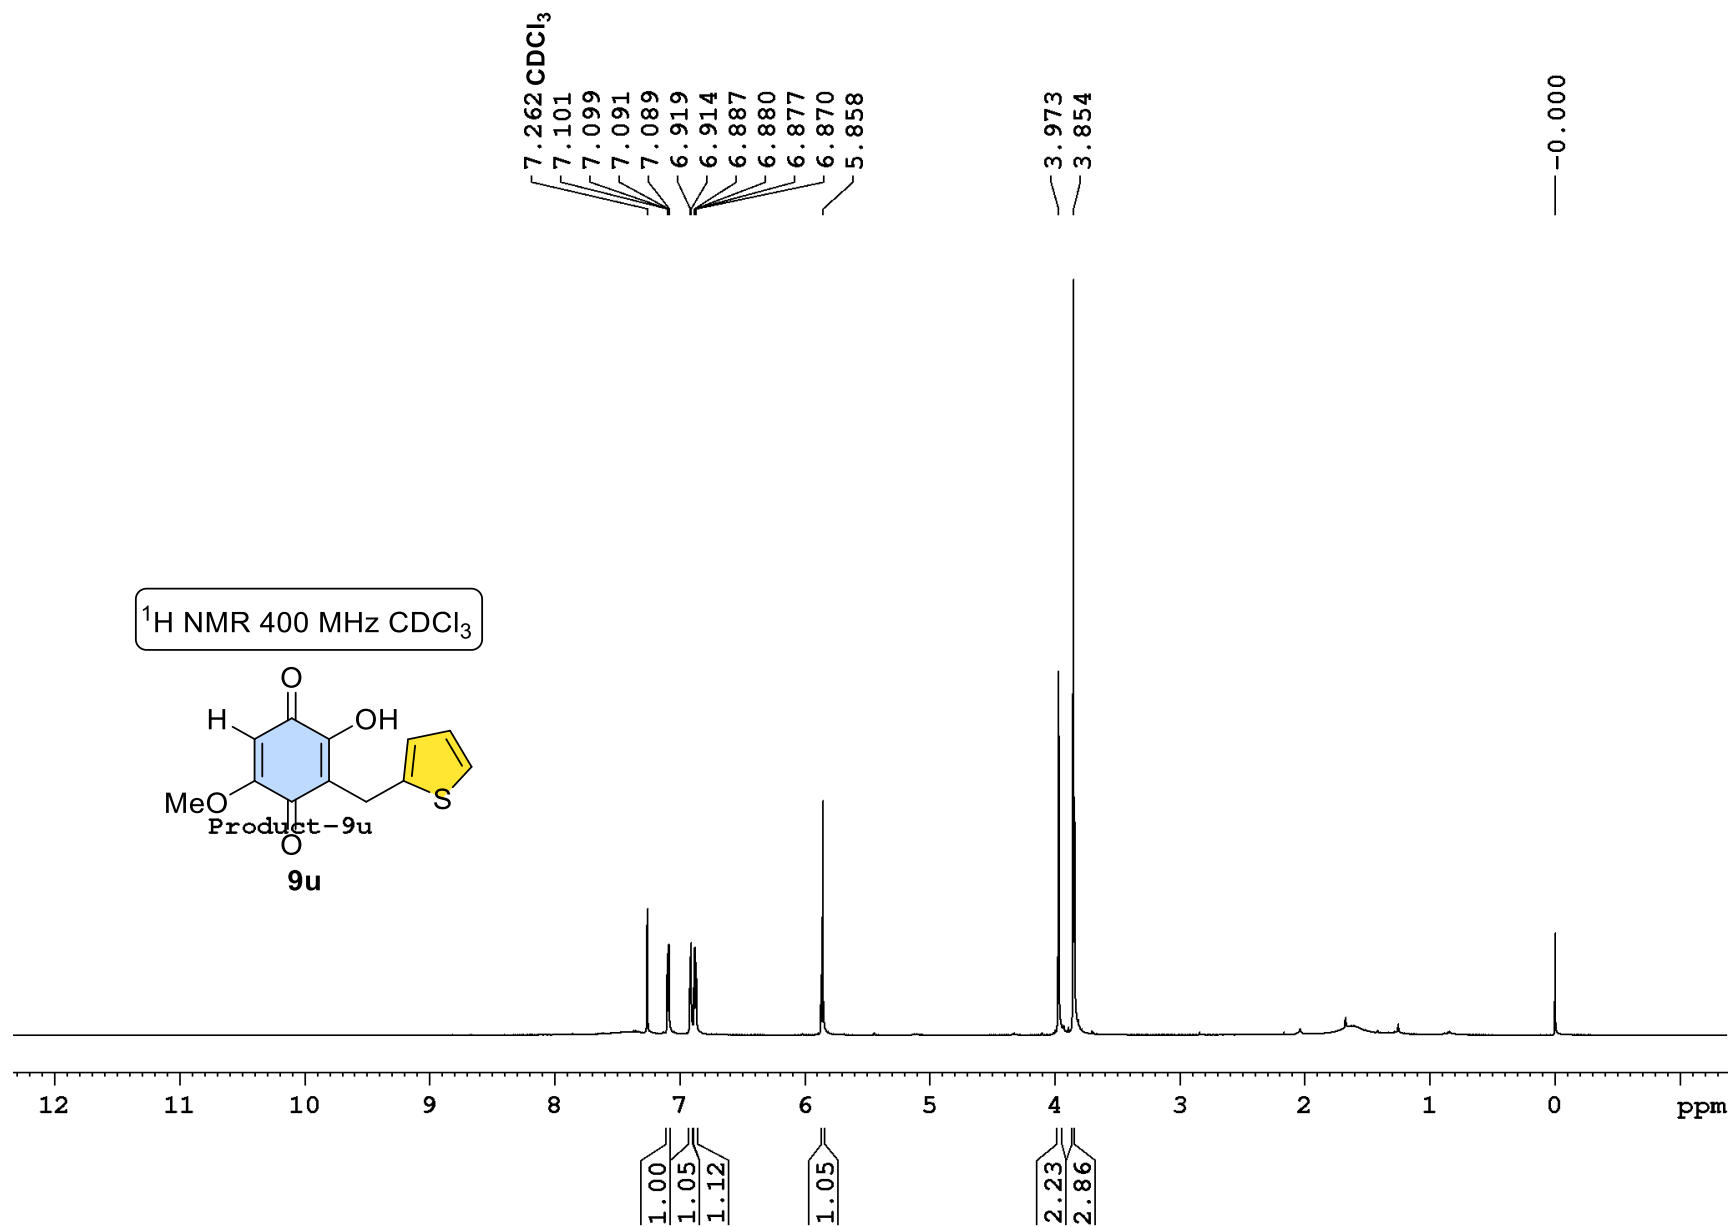

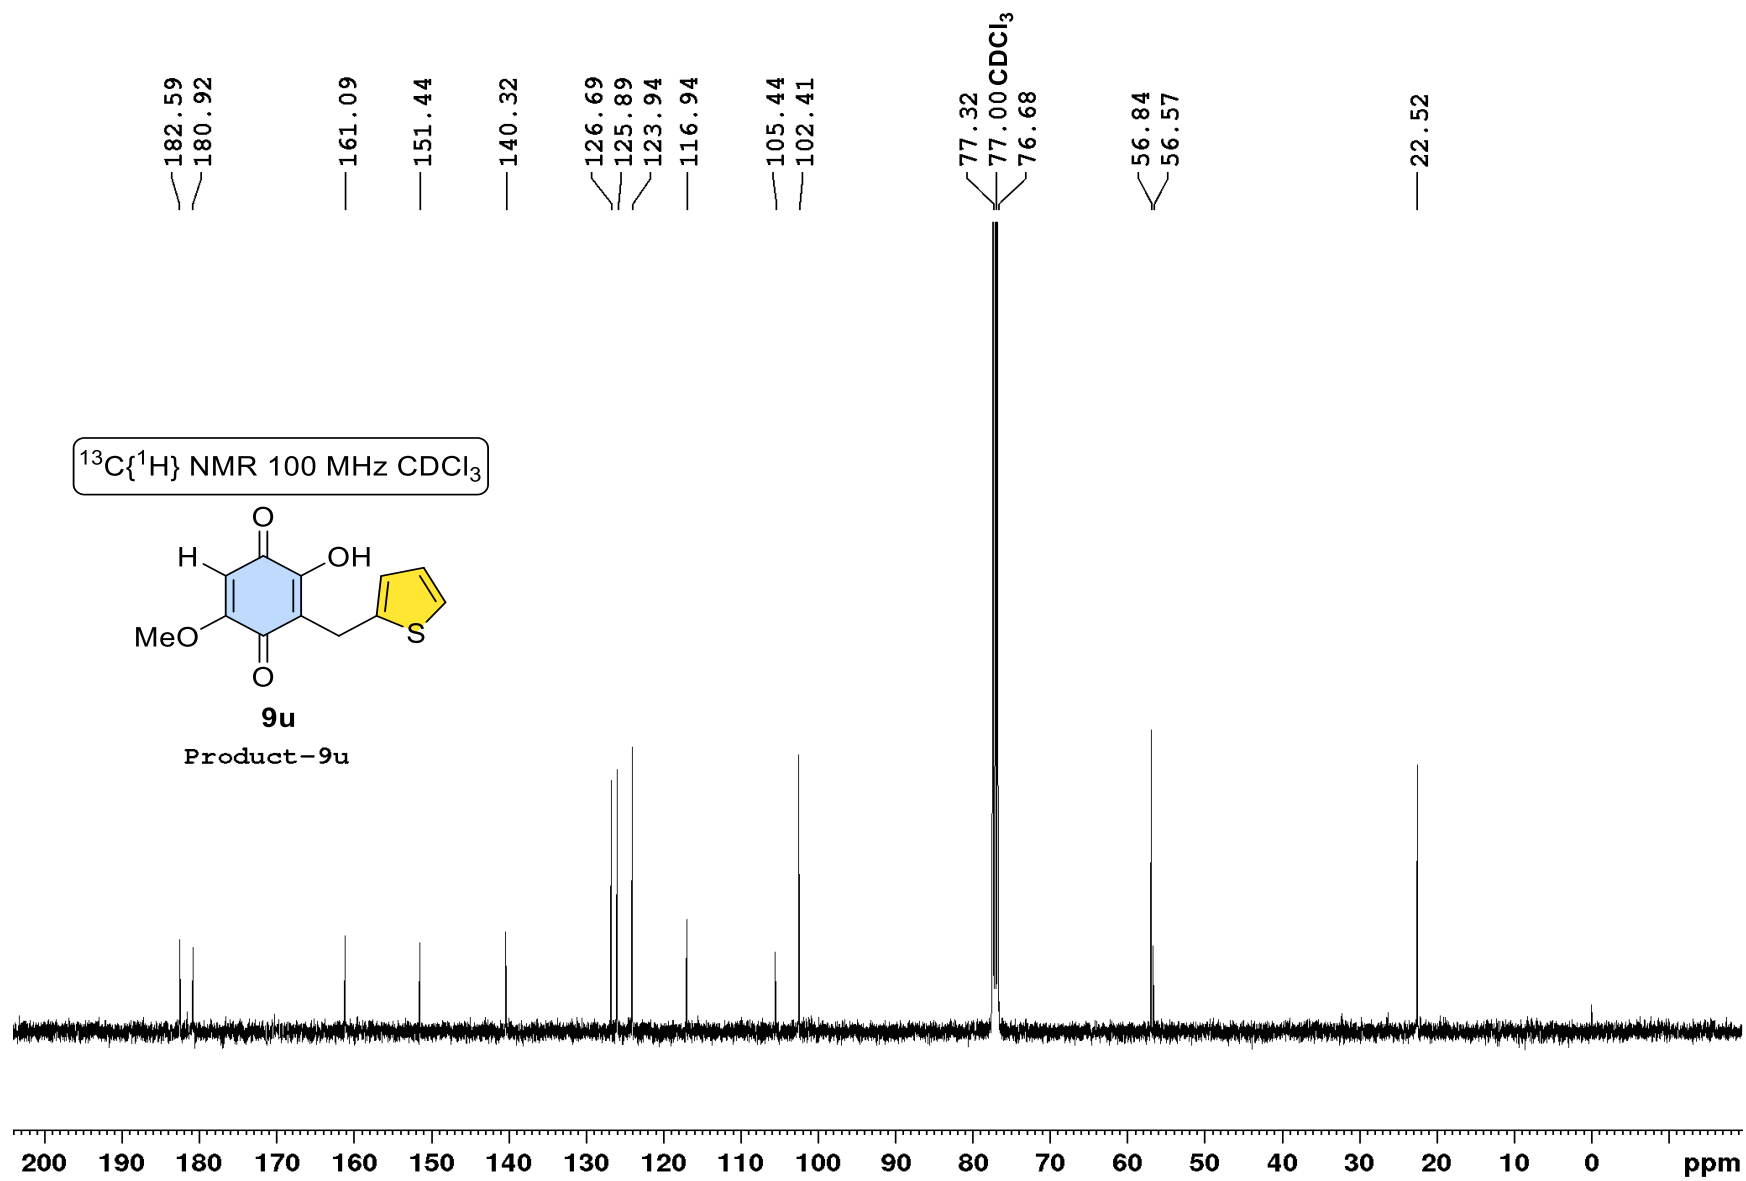

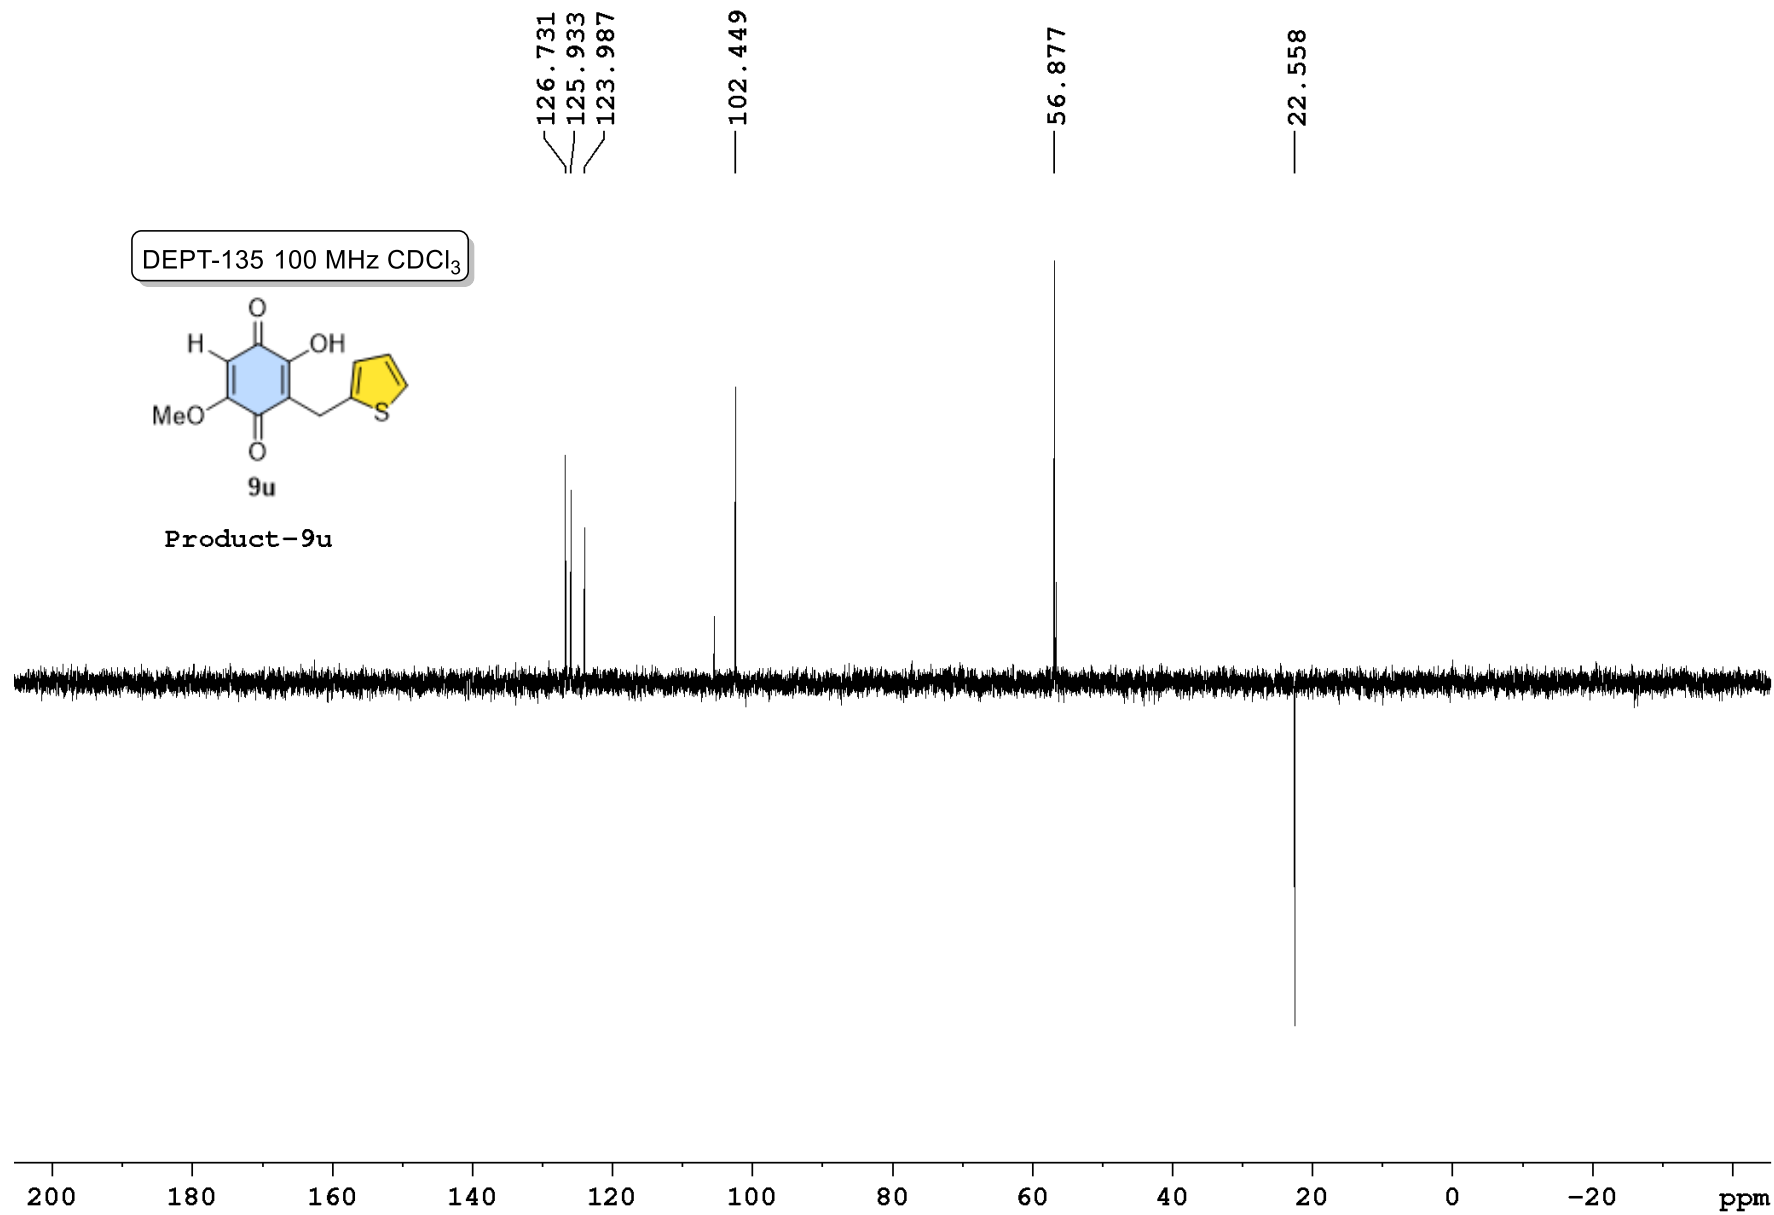

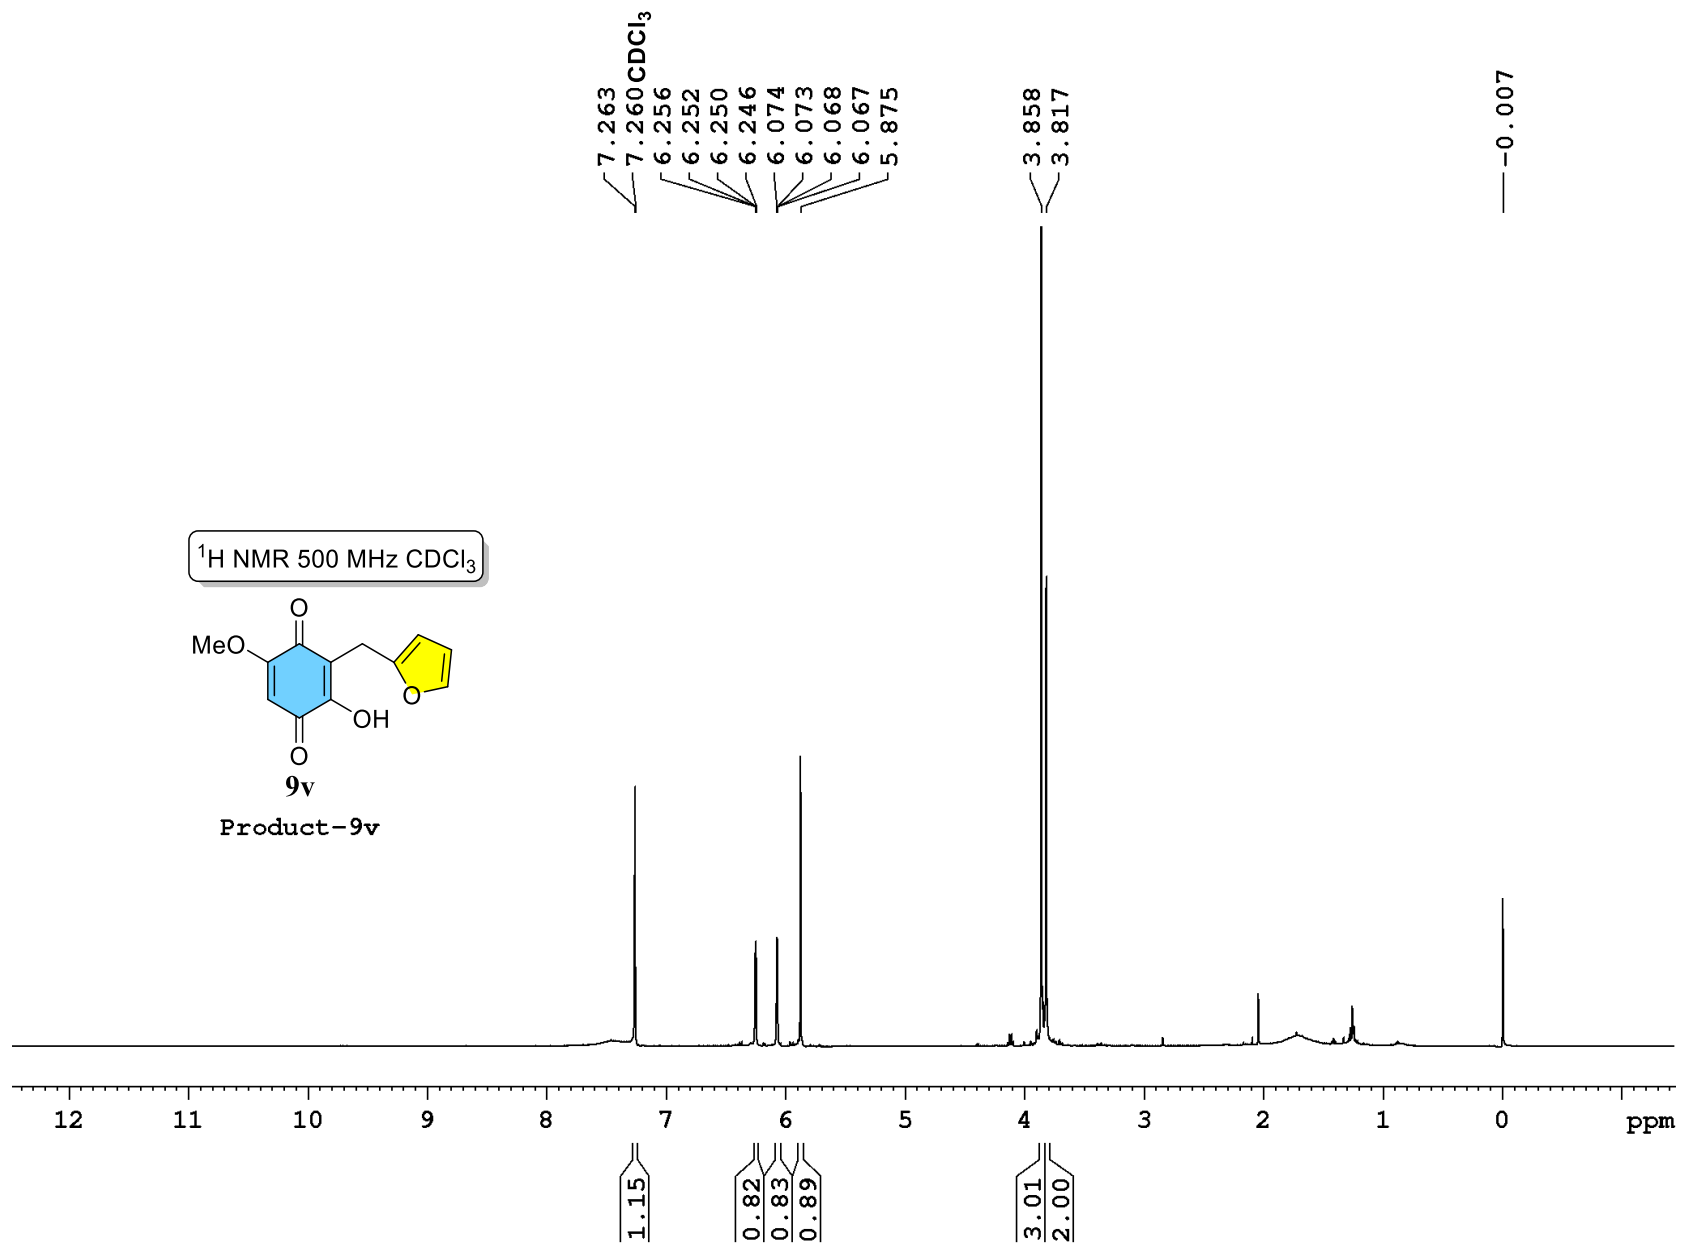

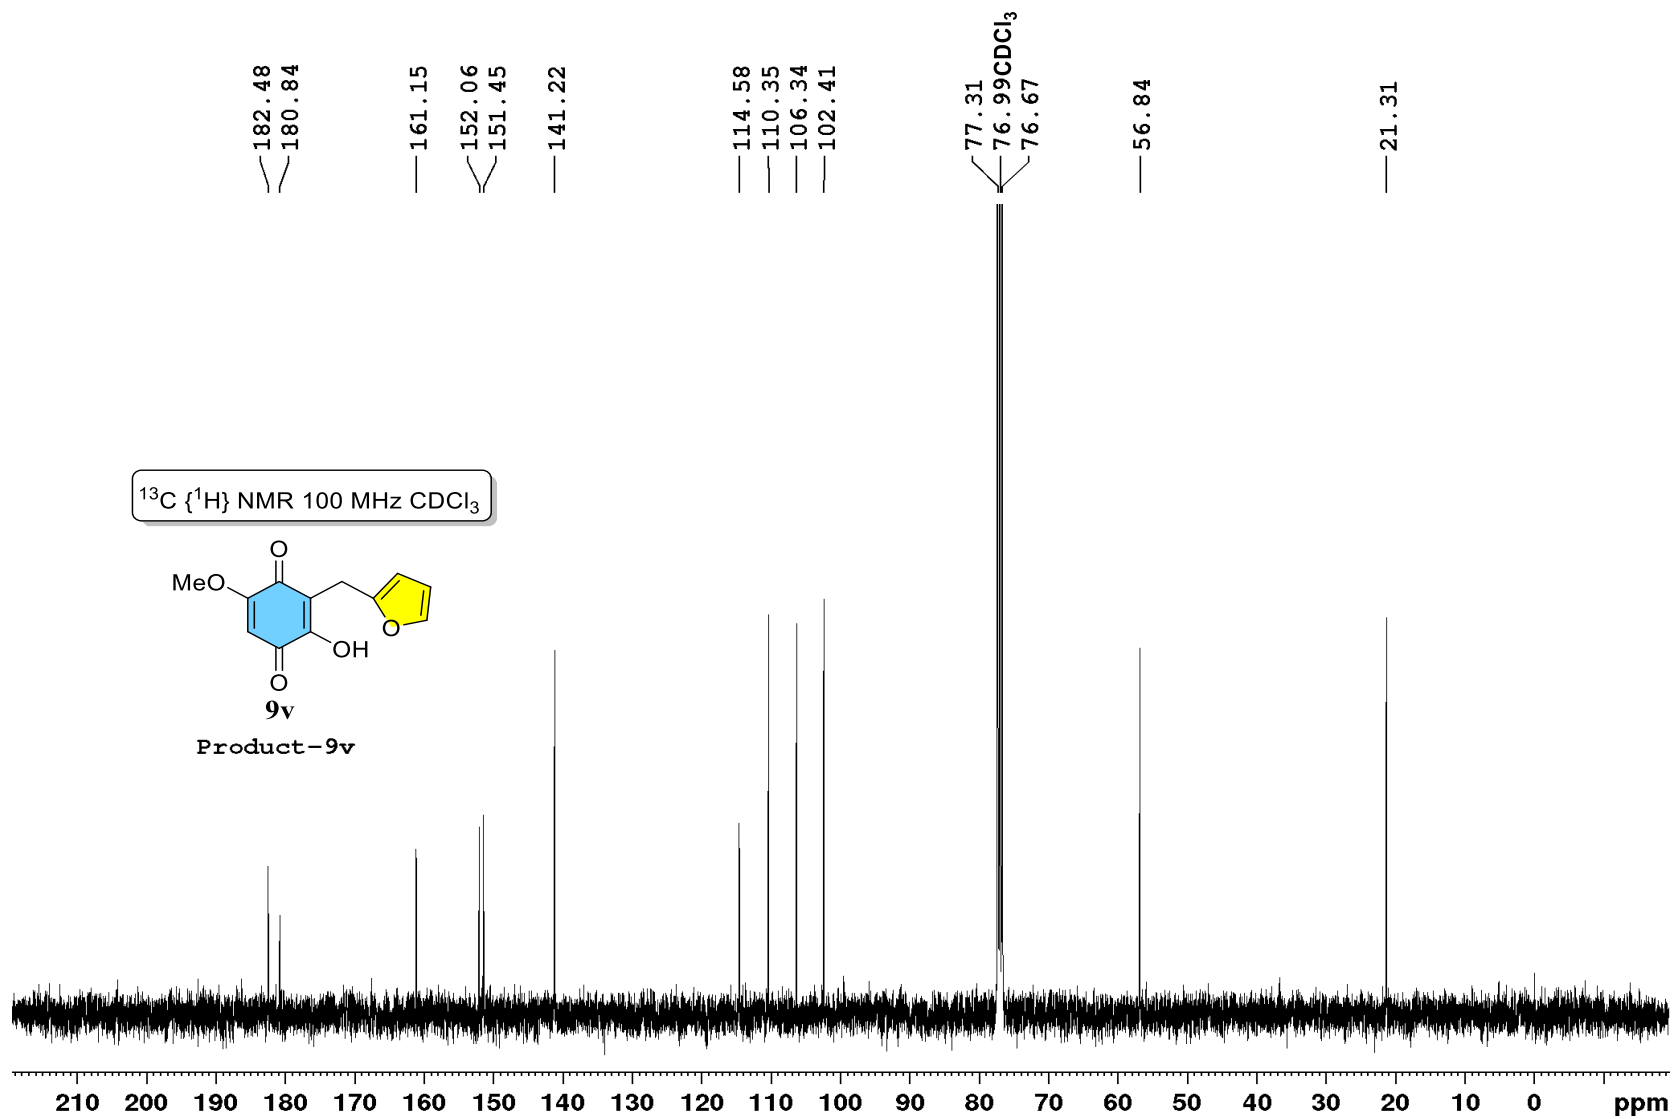

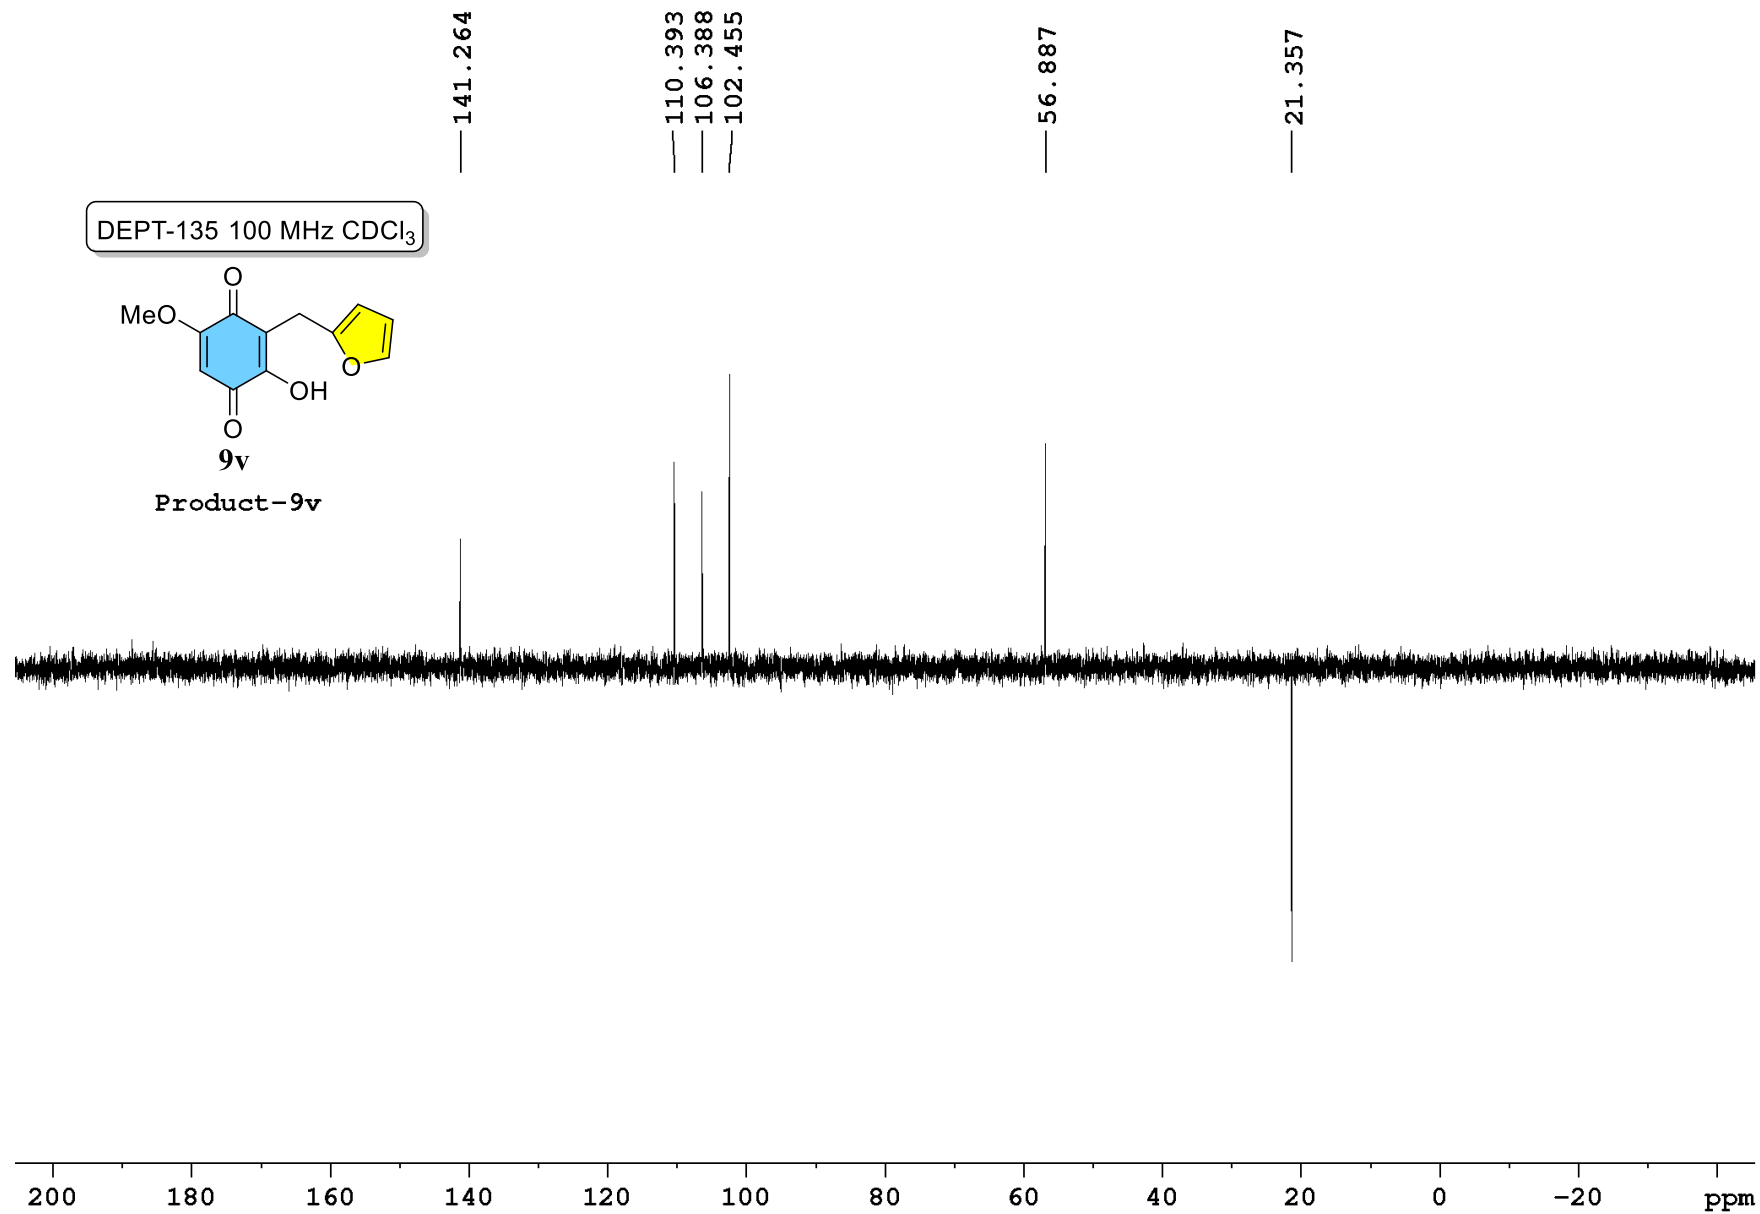

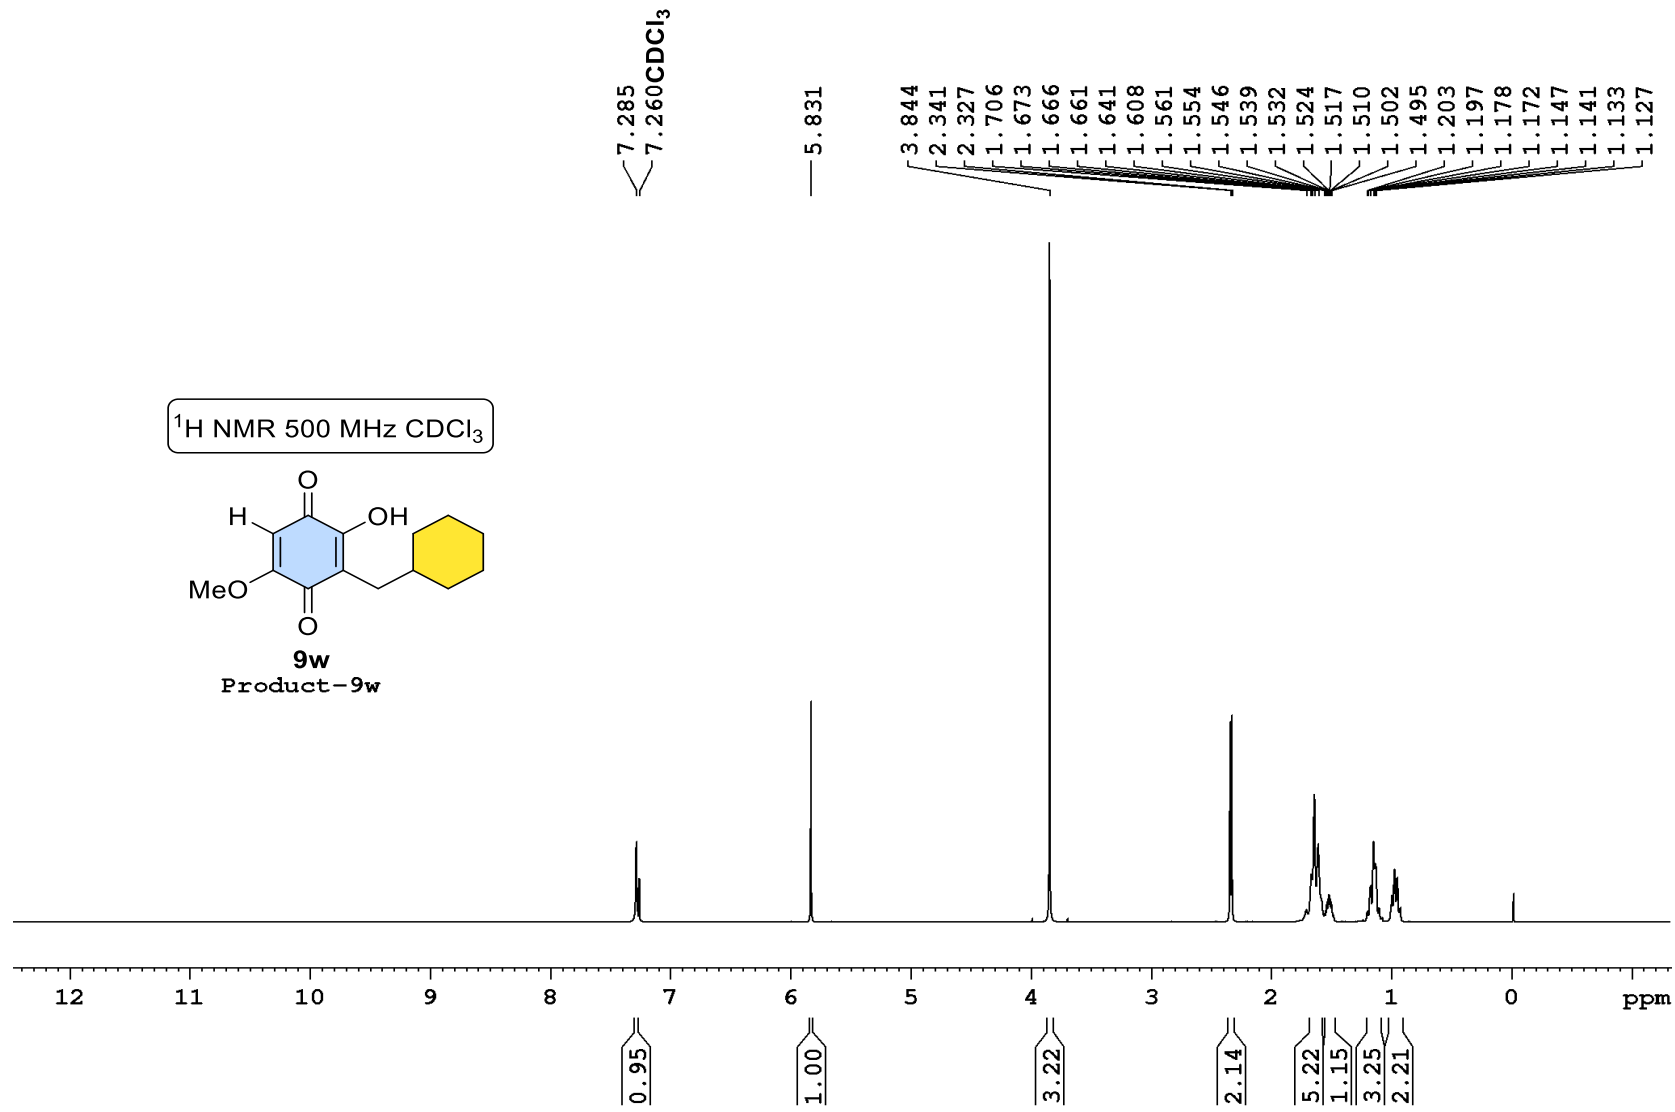

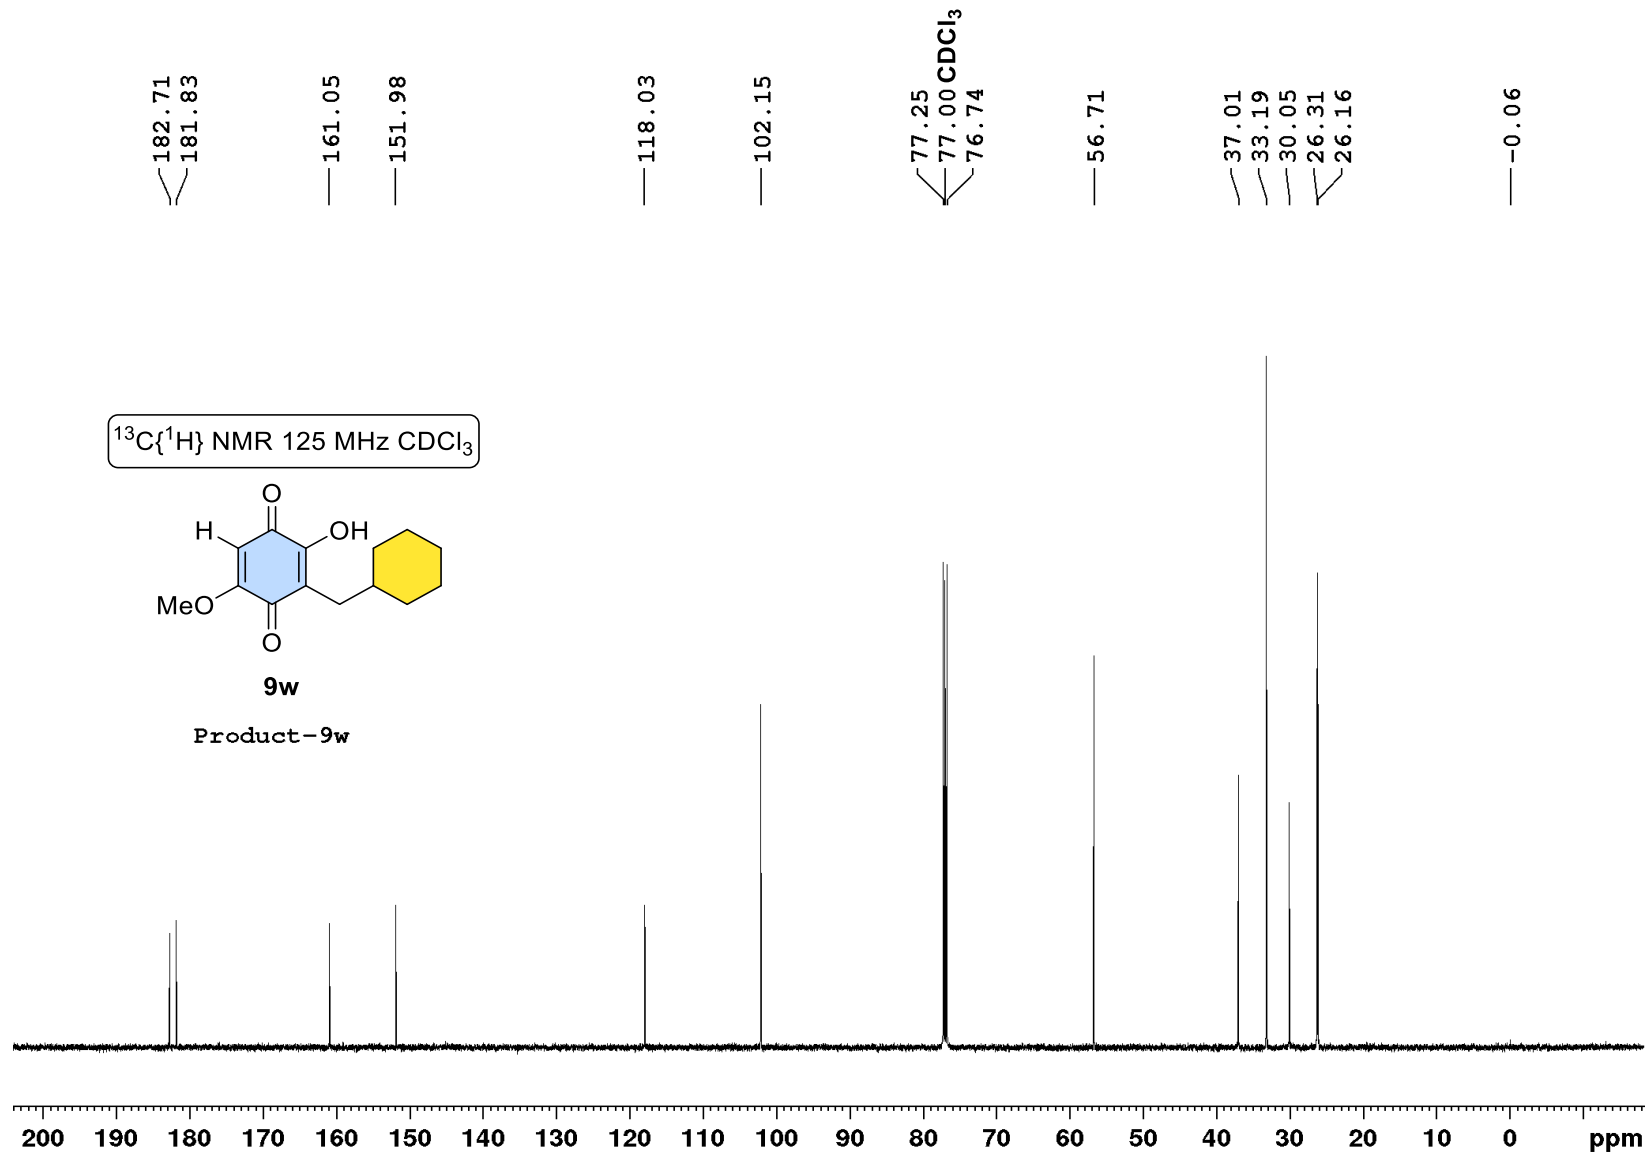



DEPT-135 125 MHz CDCl<sub>3</sub>

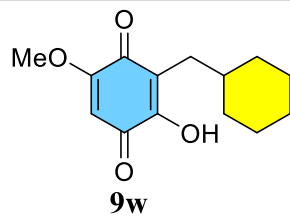

Product-9w

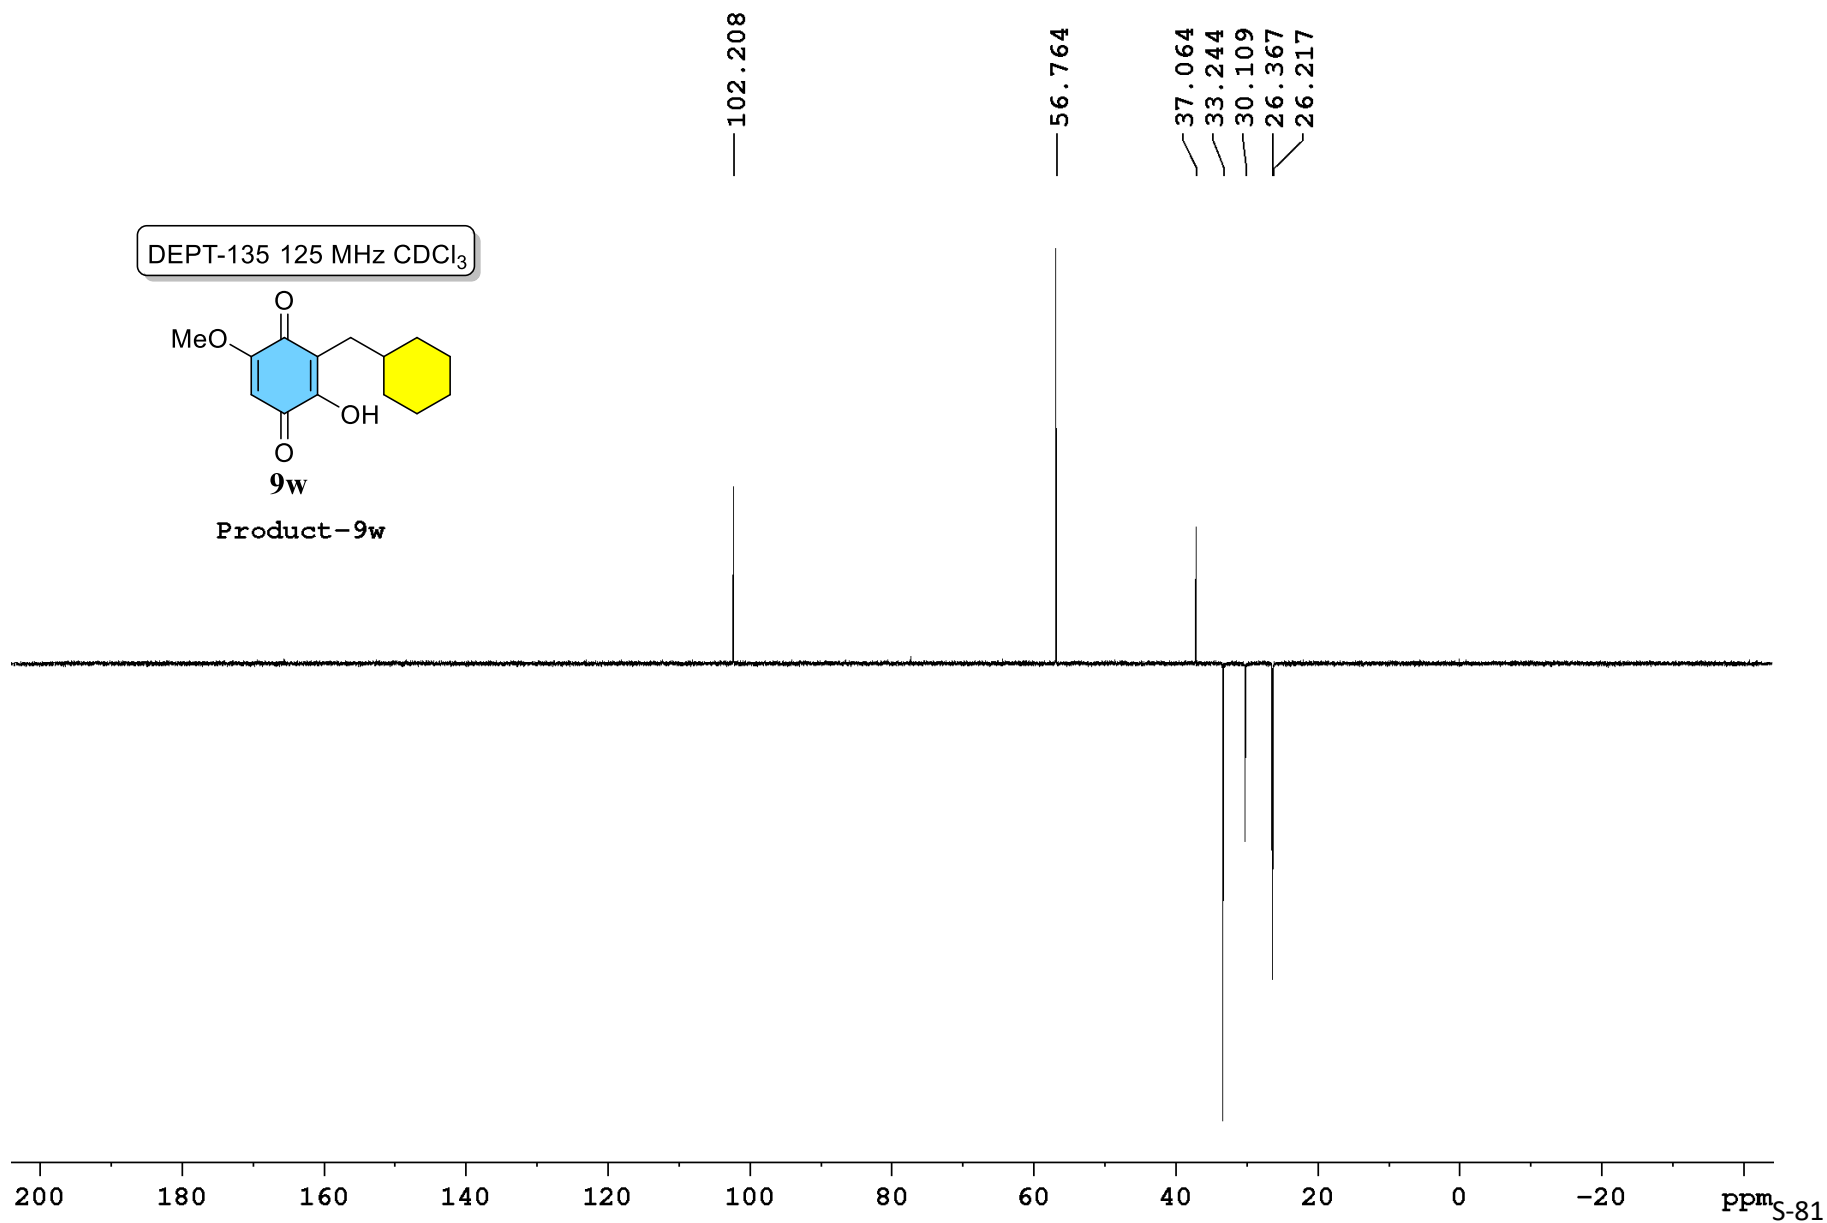

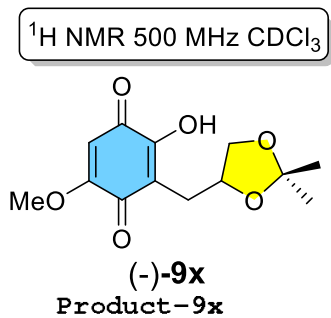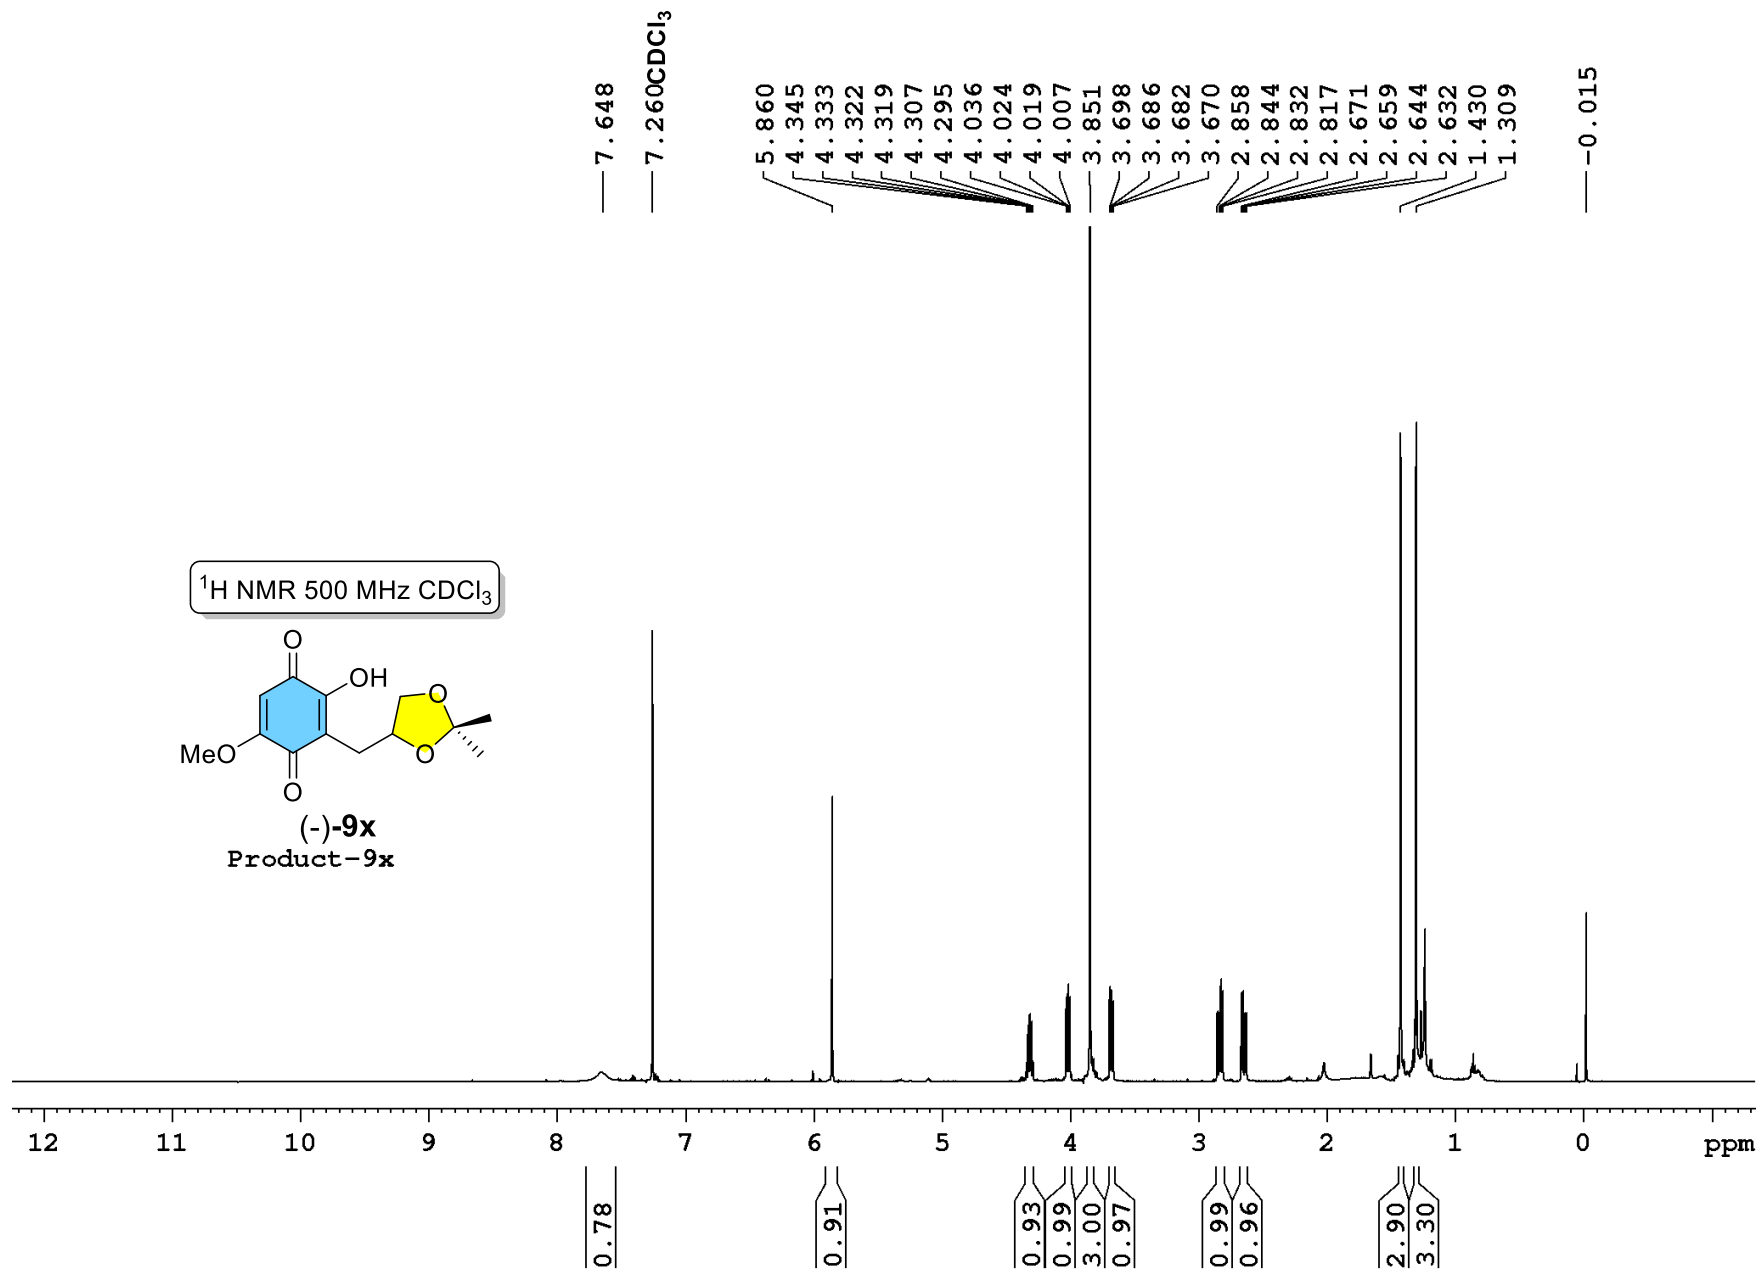

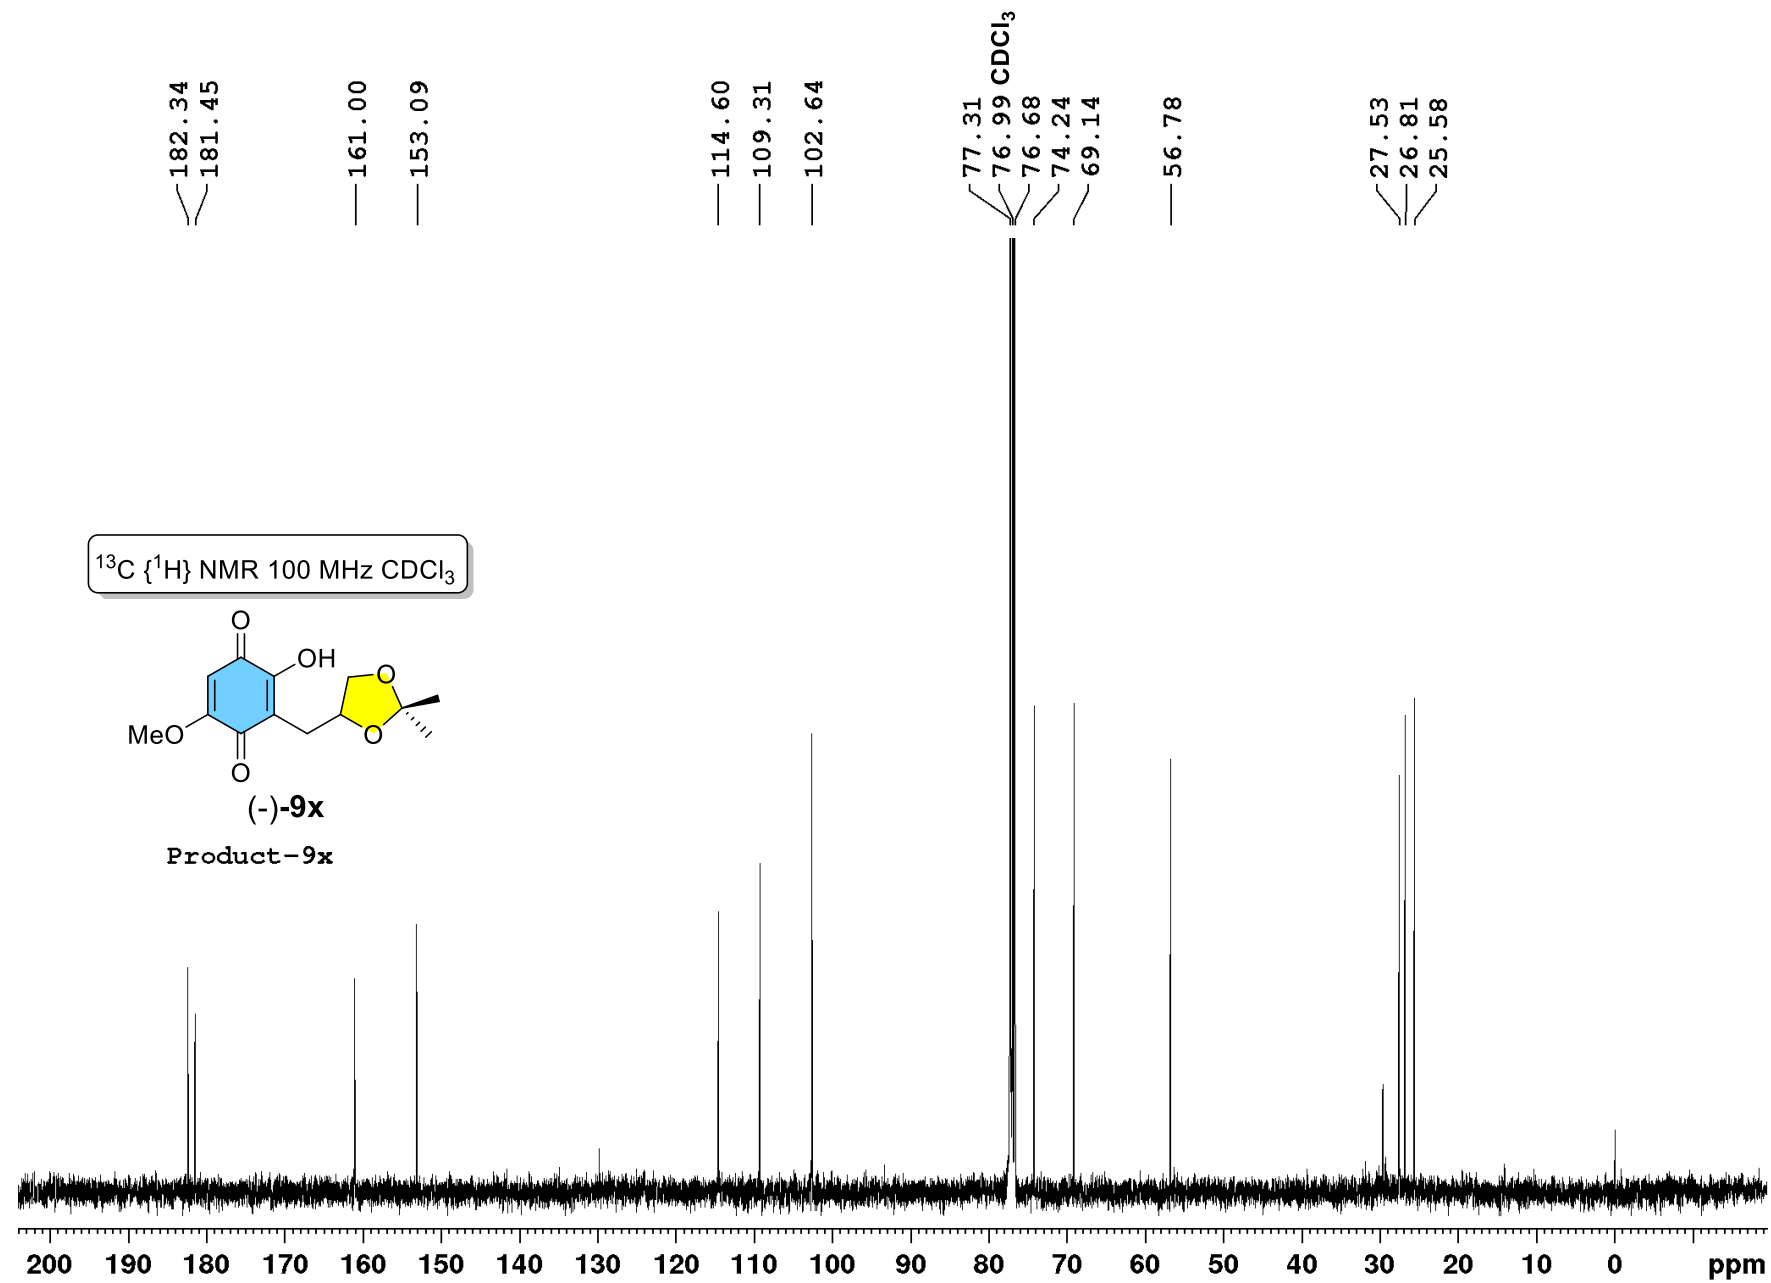

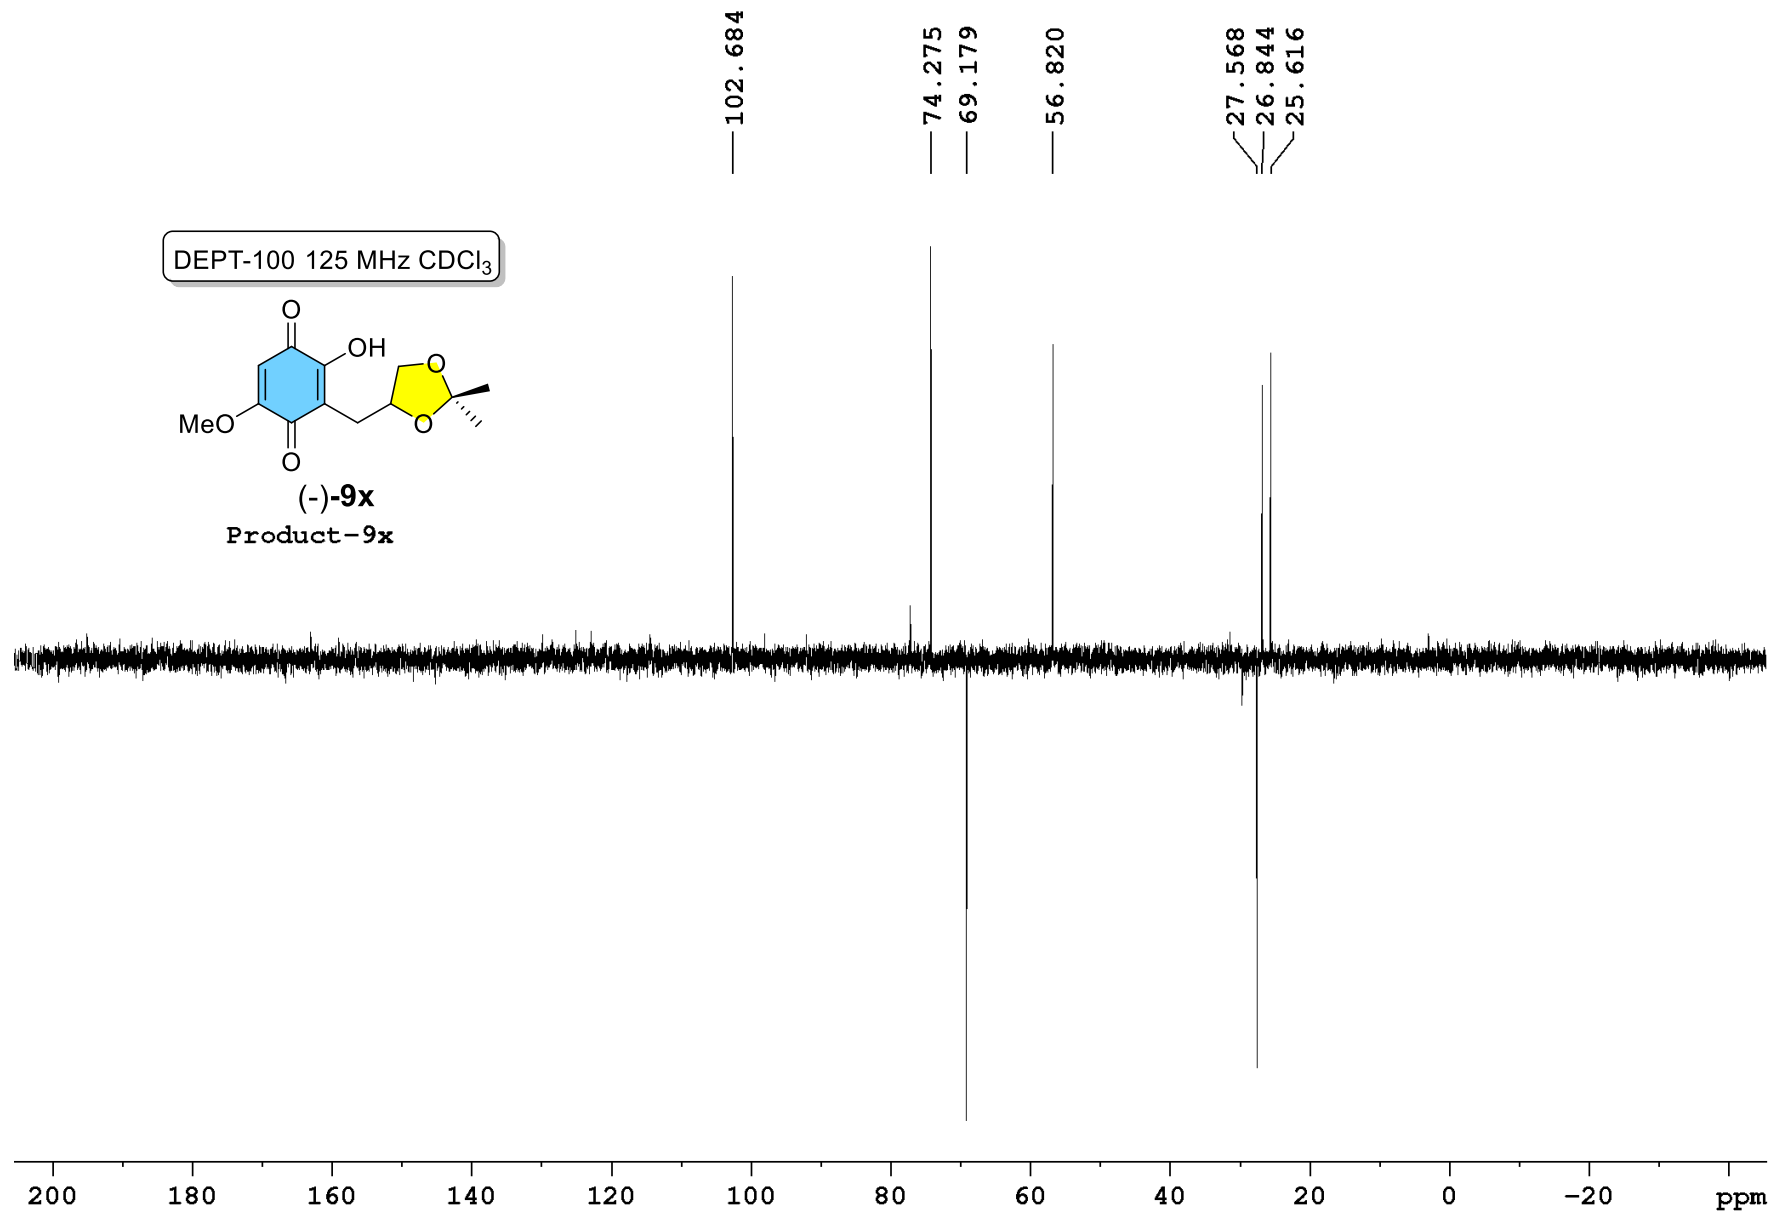

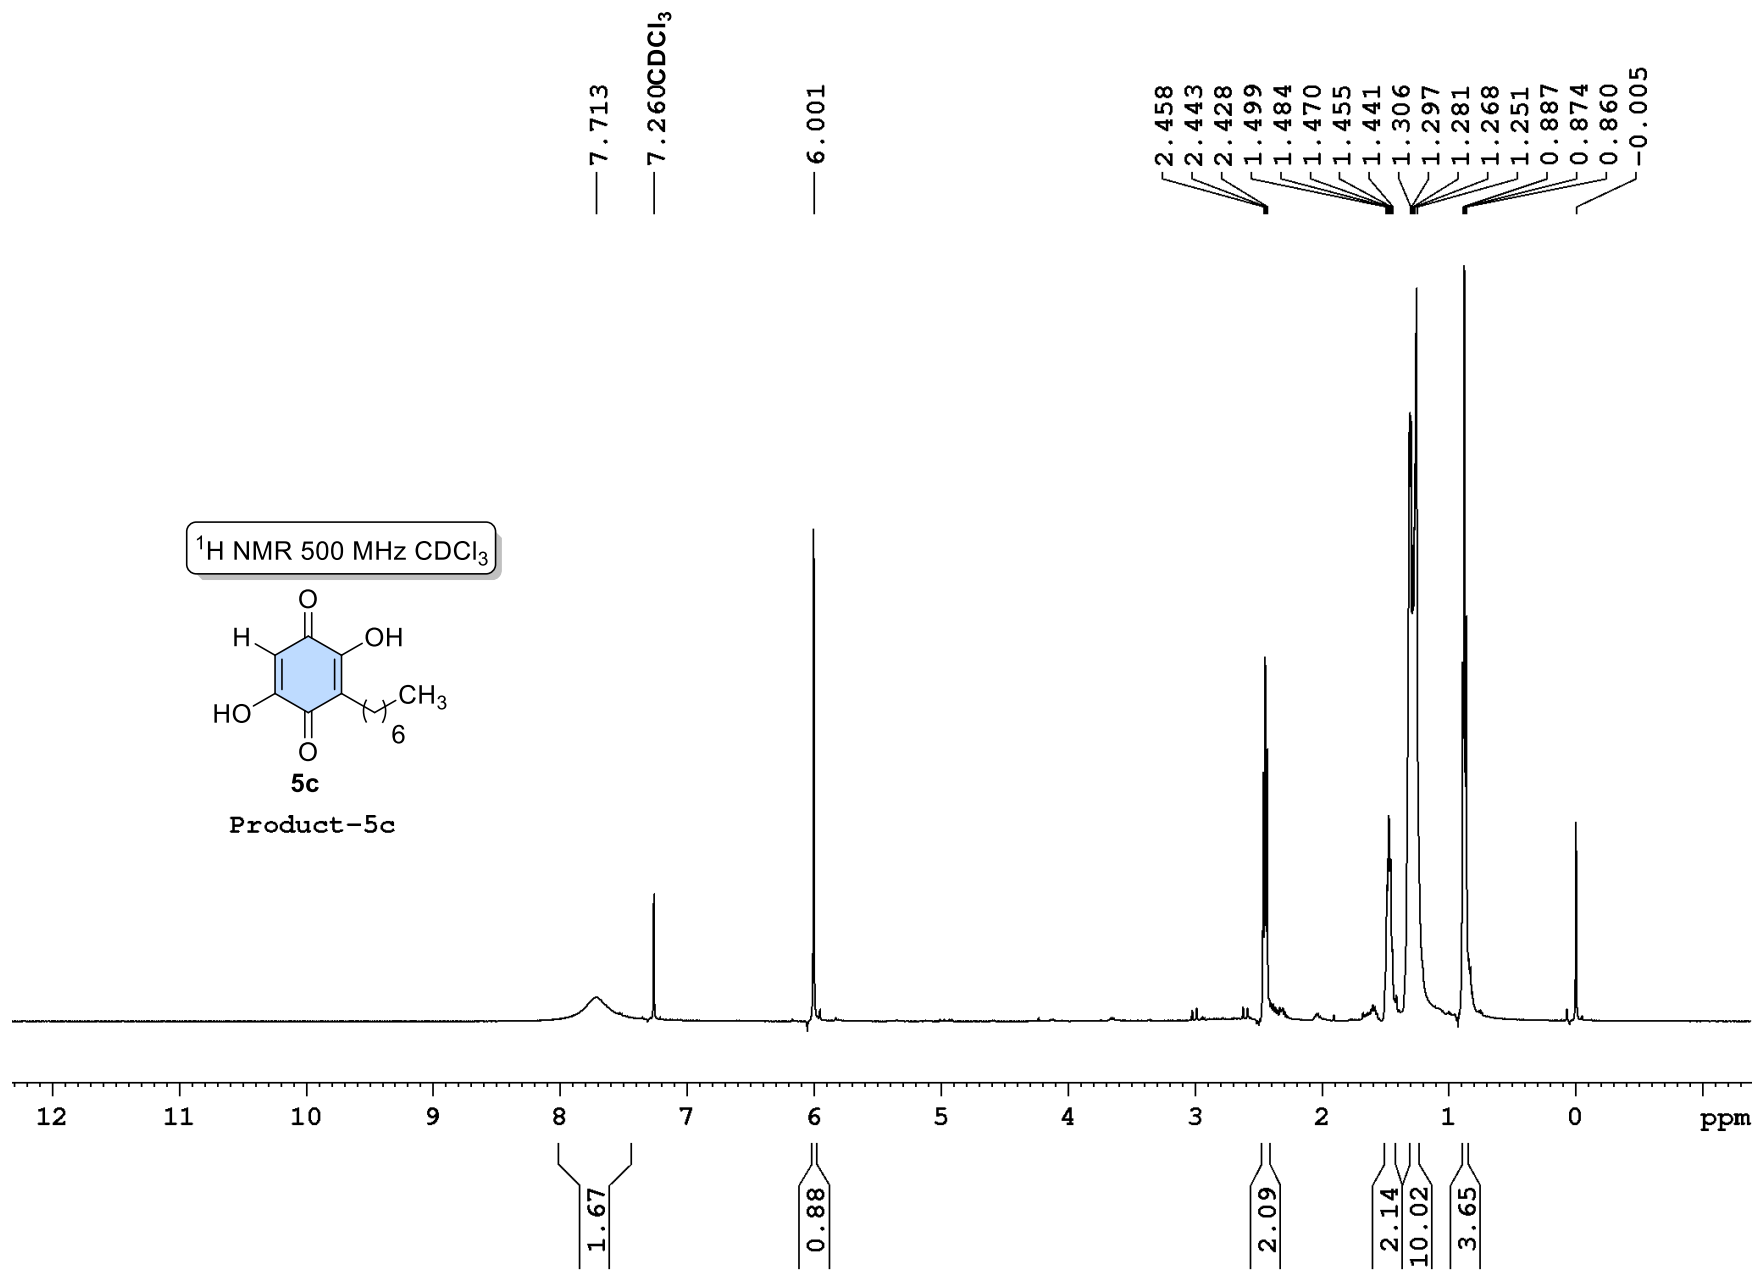

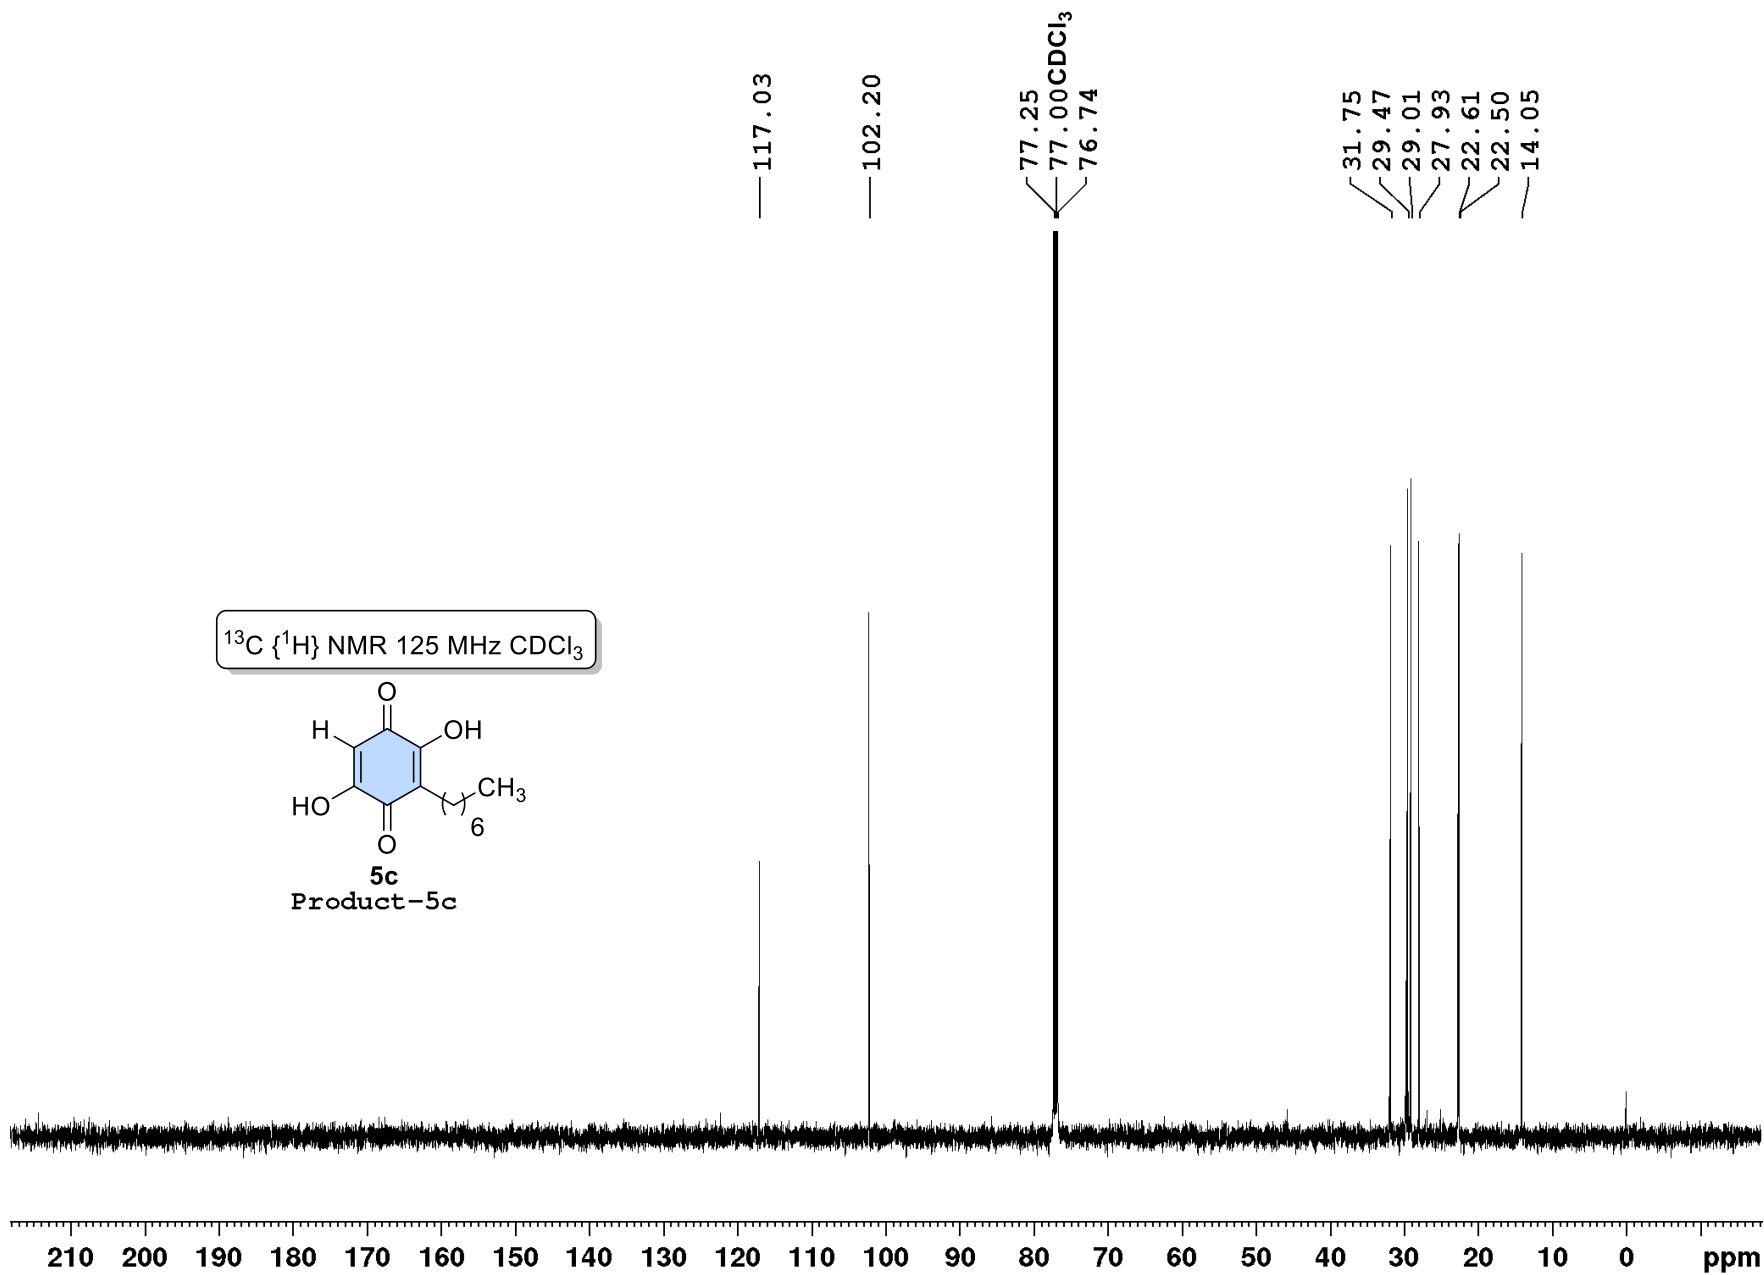

DEPT-135 125 MHz CDCl<sub>3</sub>

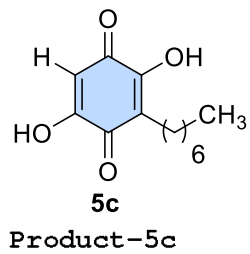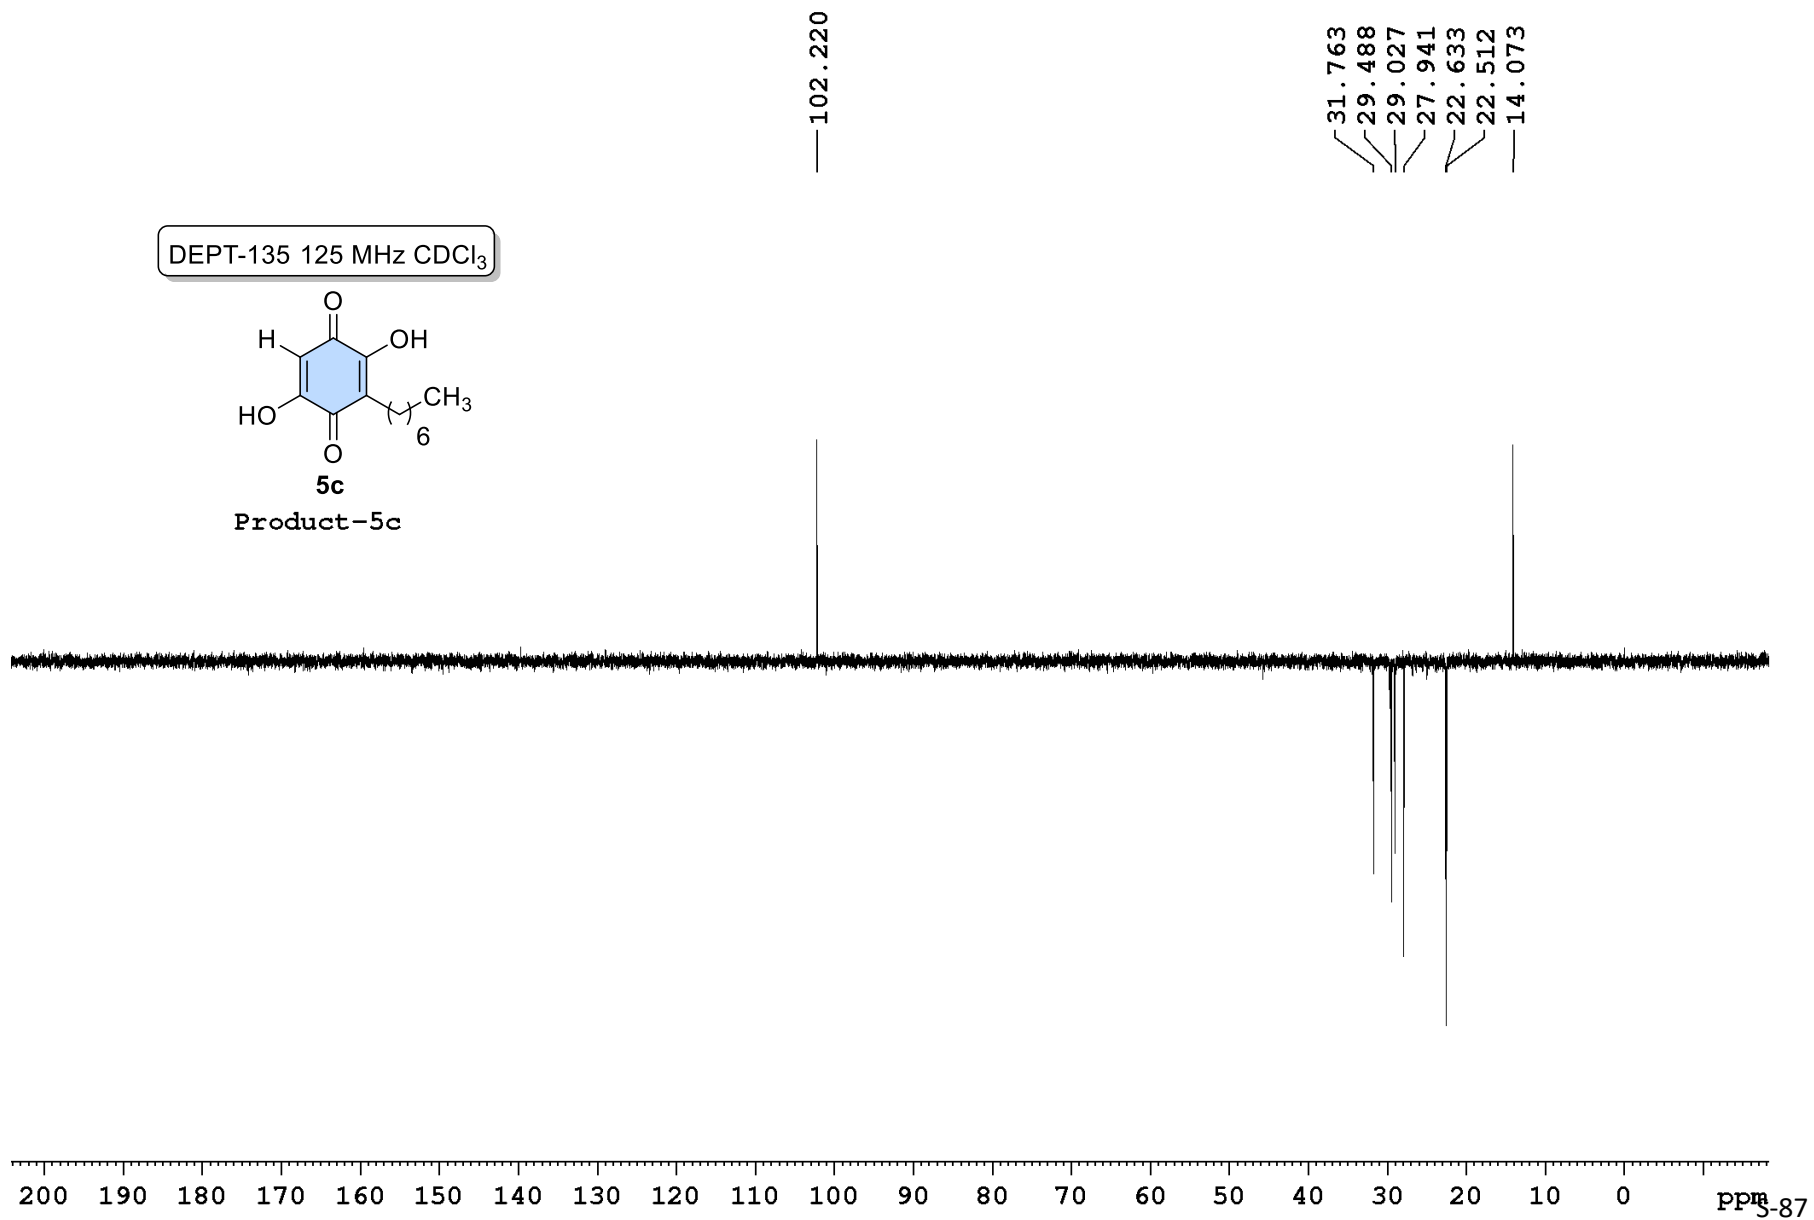

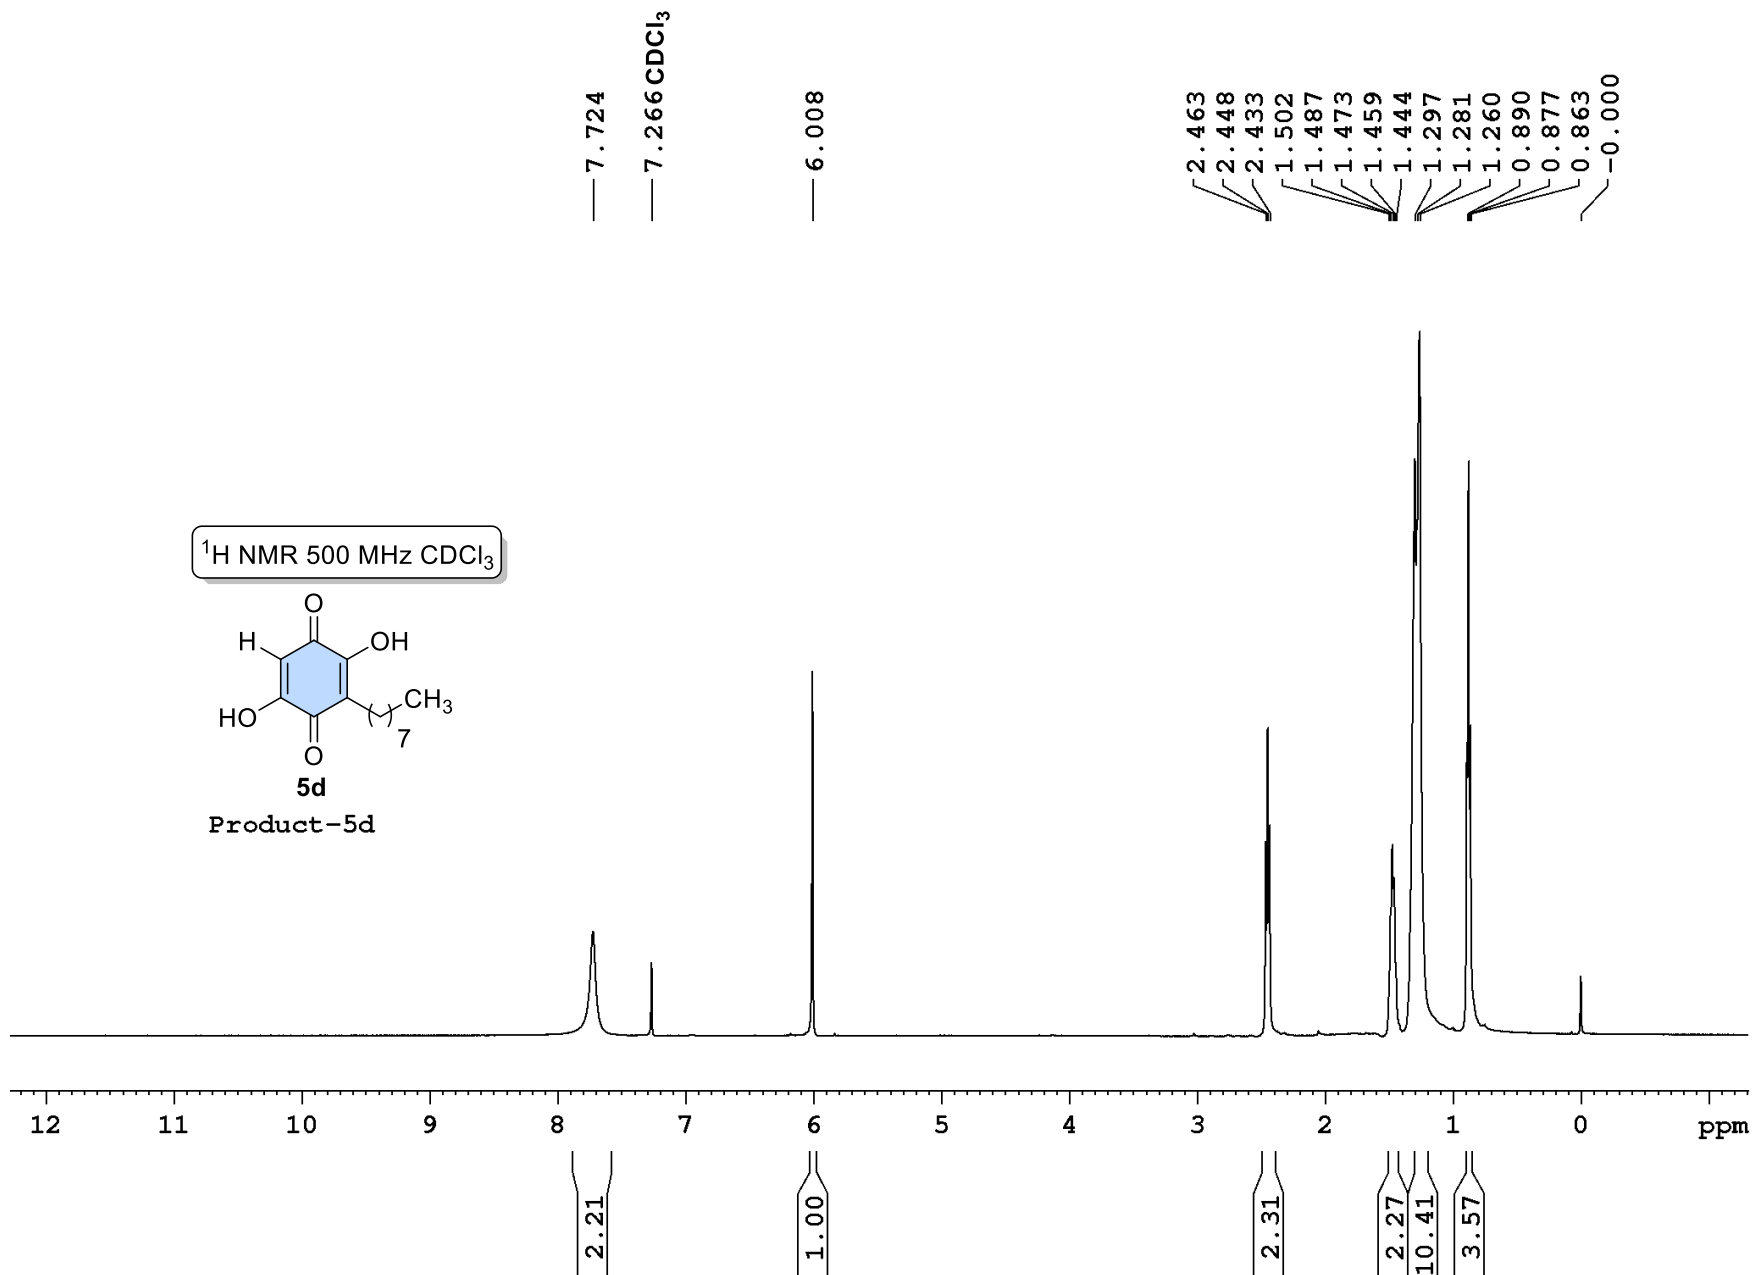



$^{13}\text{C} \{^1\text{H}\}$  NMR 125 MHz  $\text{CDCl}_3$

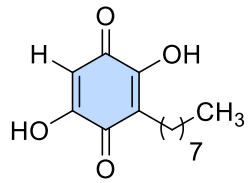

**5d**  
Product-5d

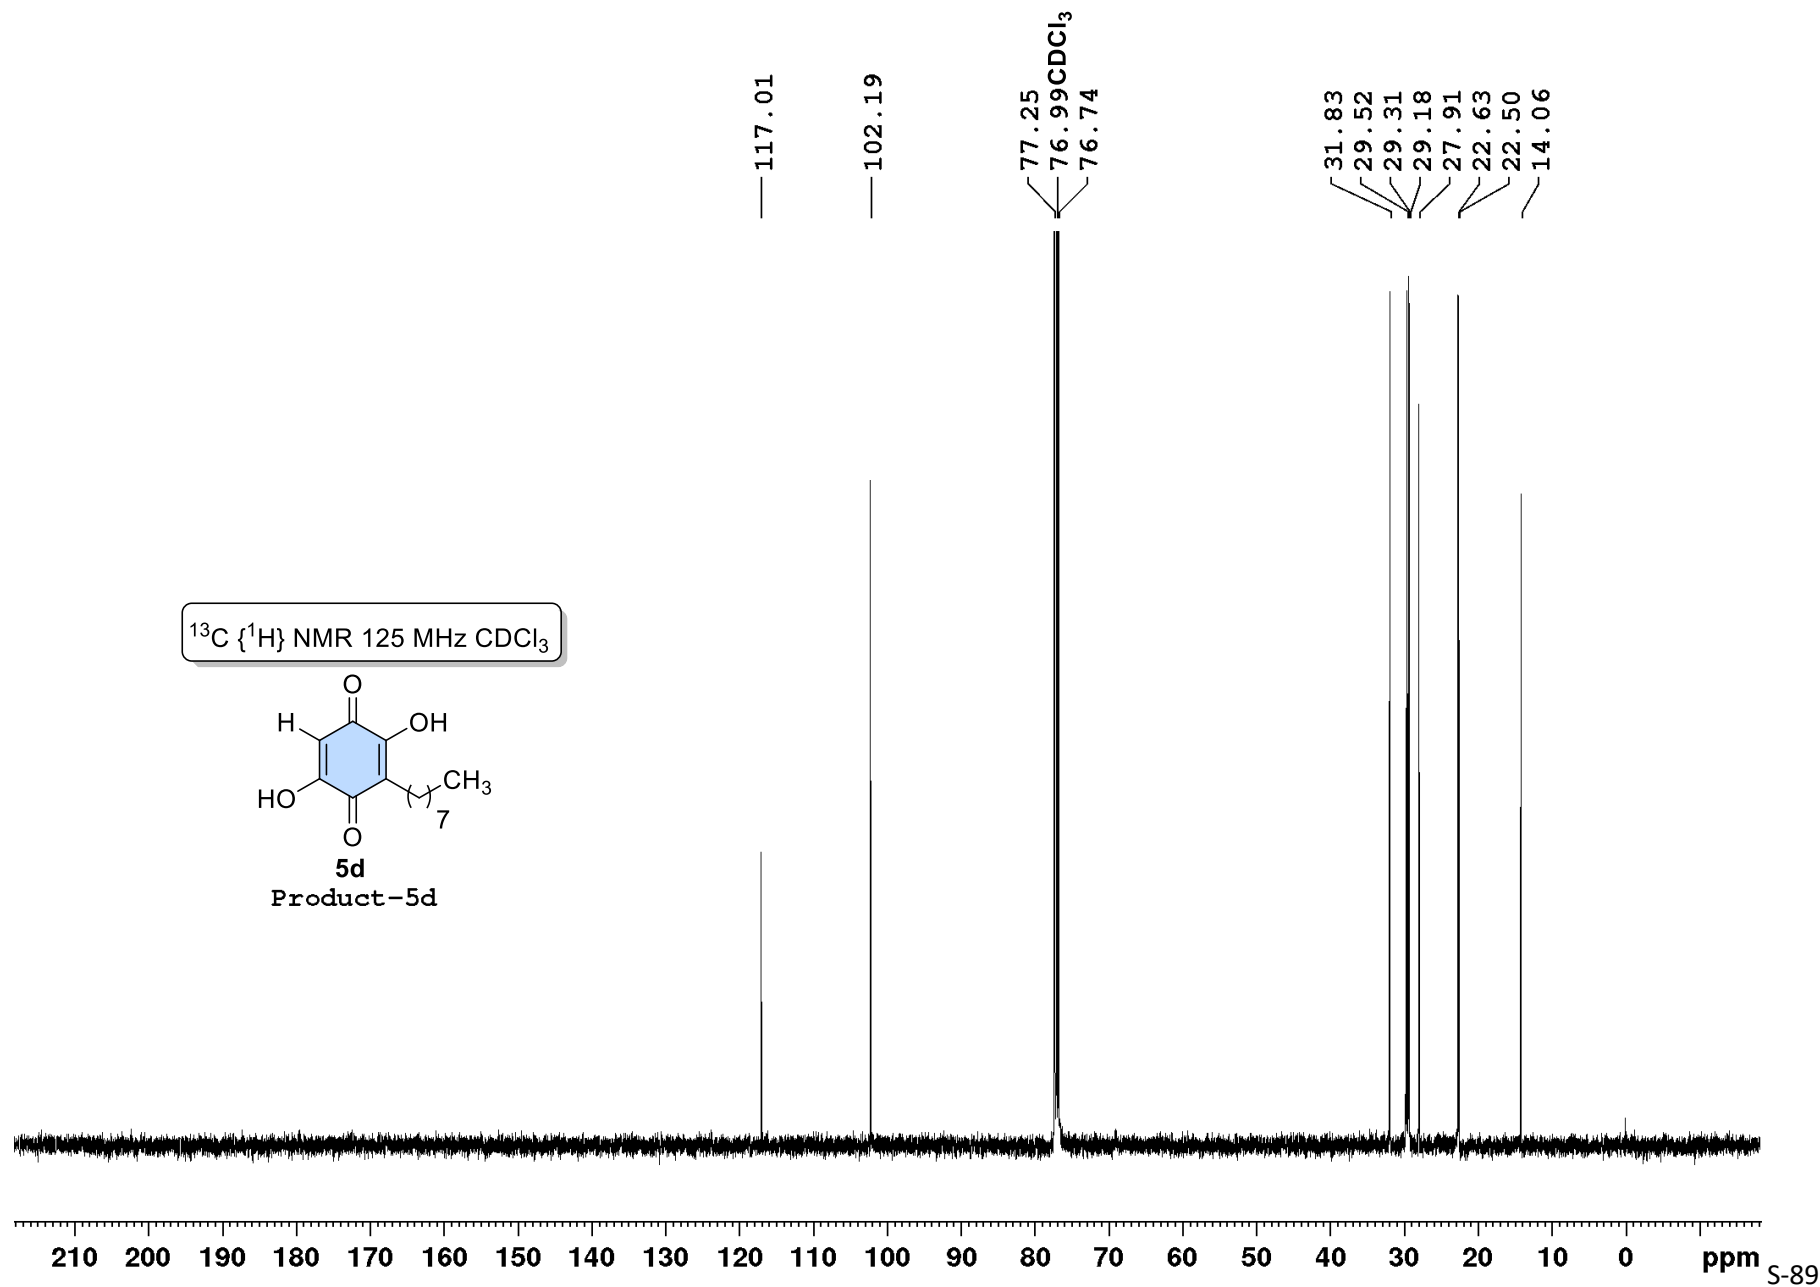

DEPT-135 125 MHz CDCl<sub>3</sub>

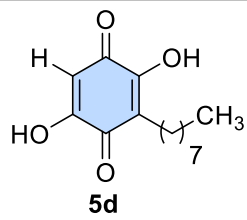

Product-5d

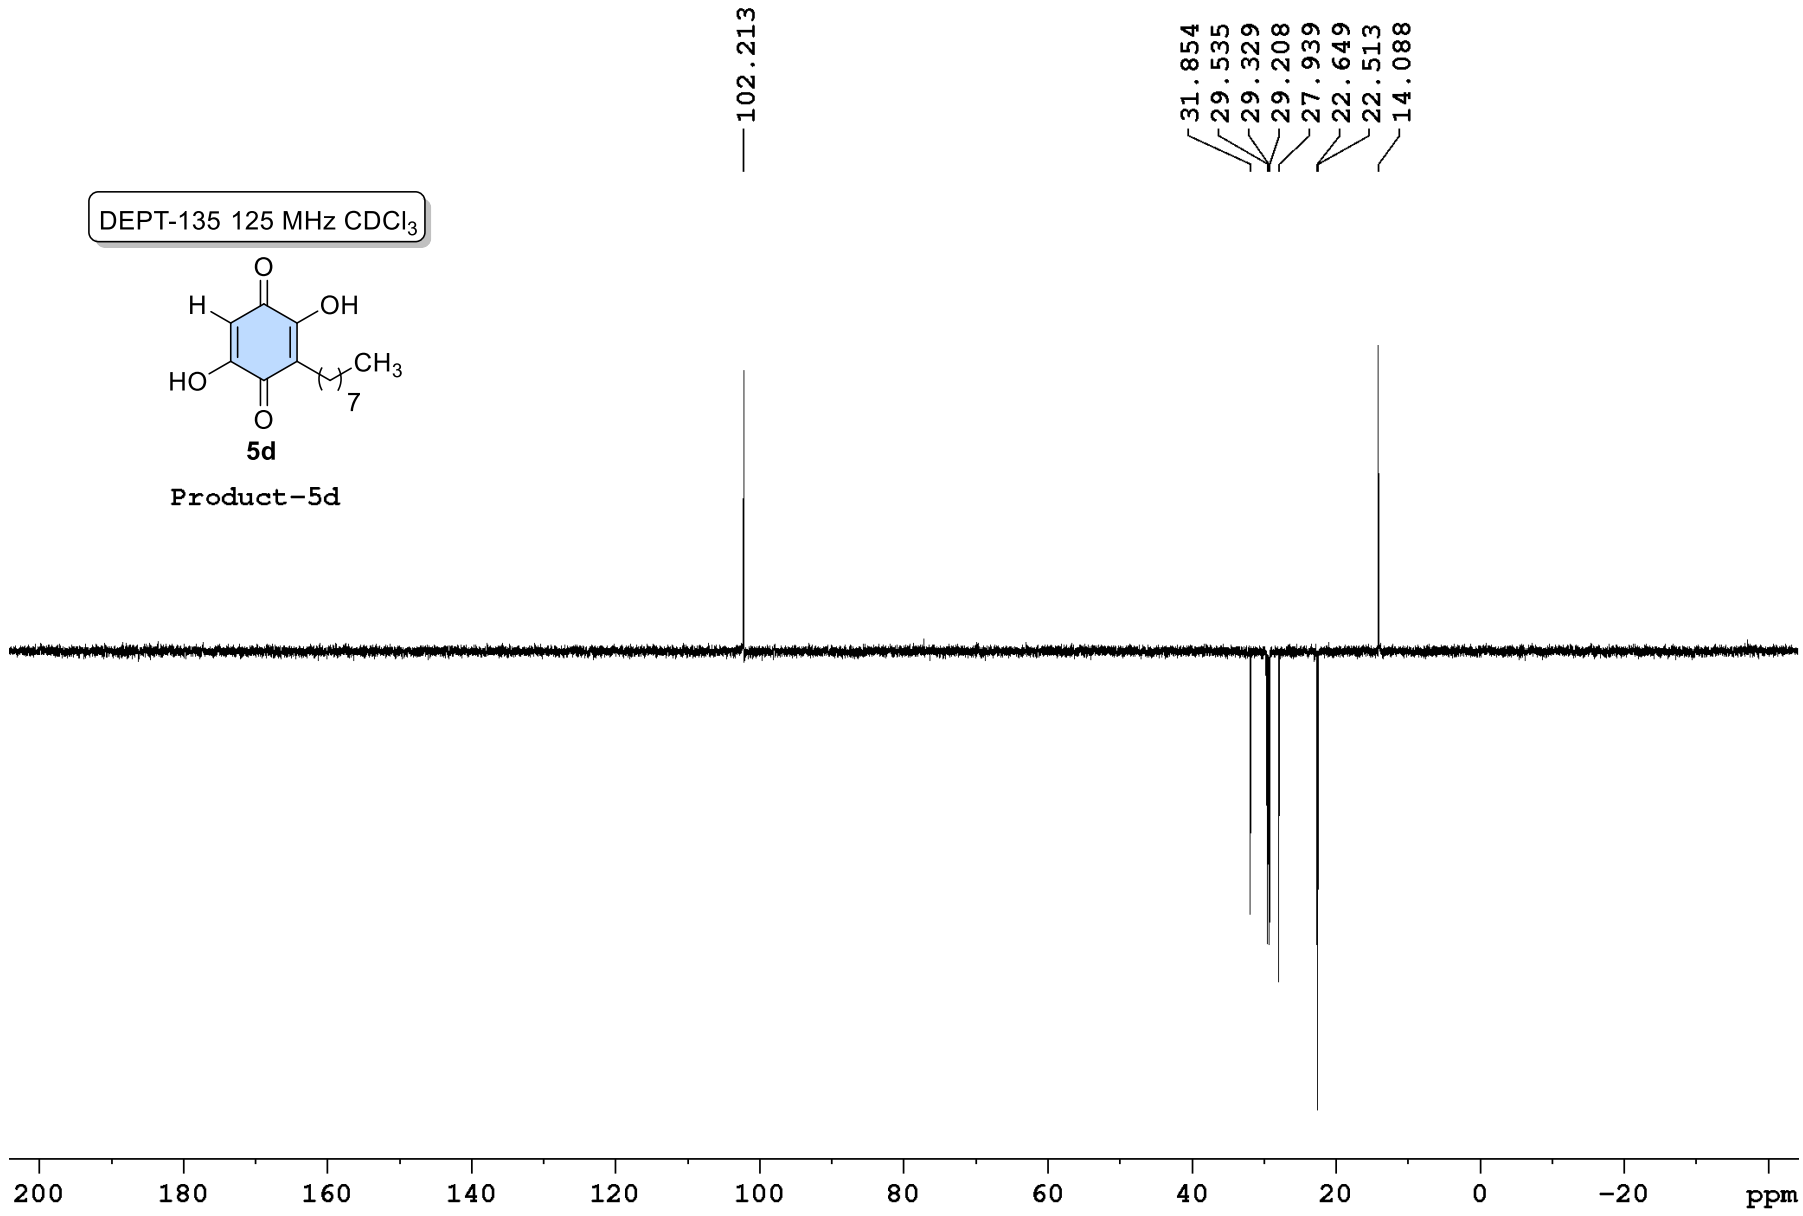

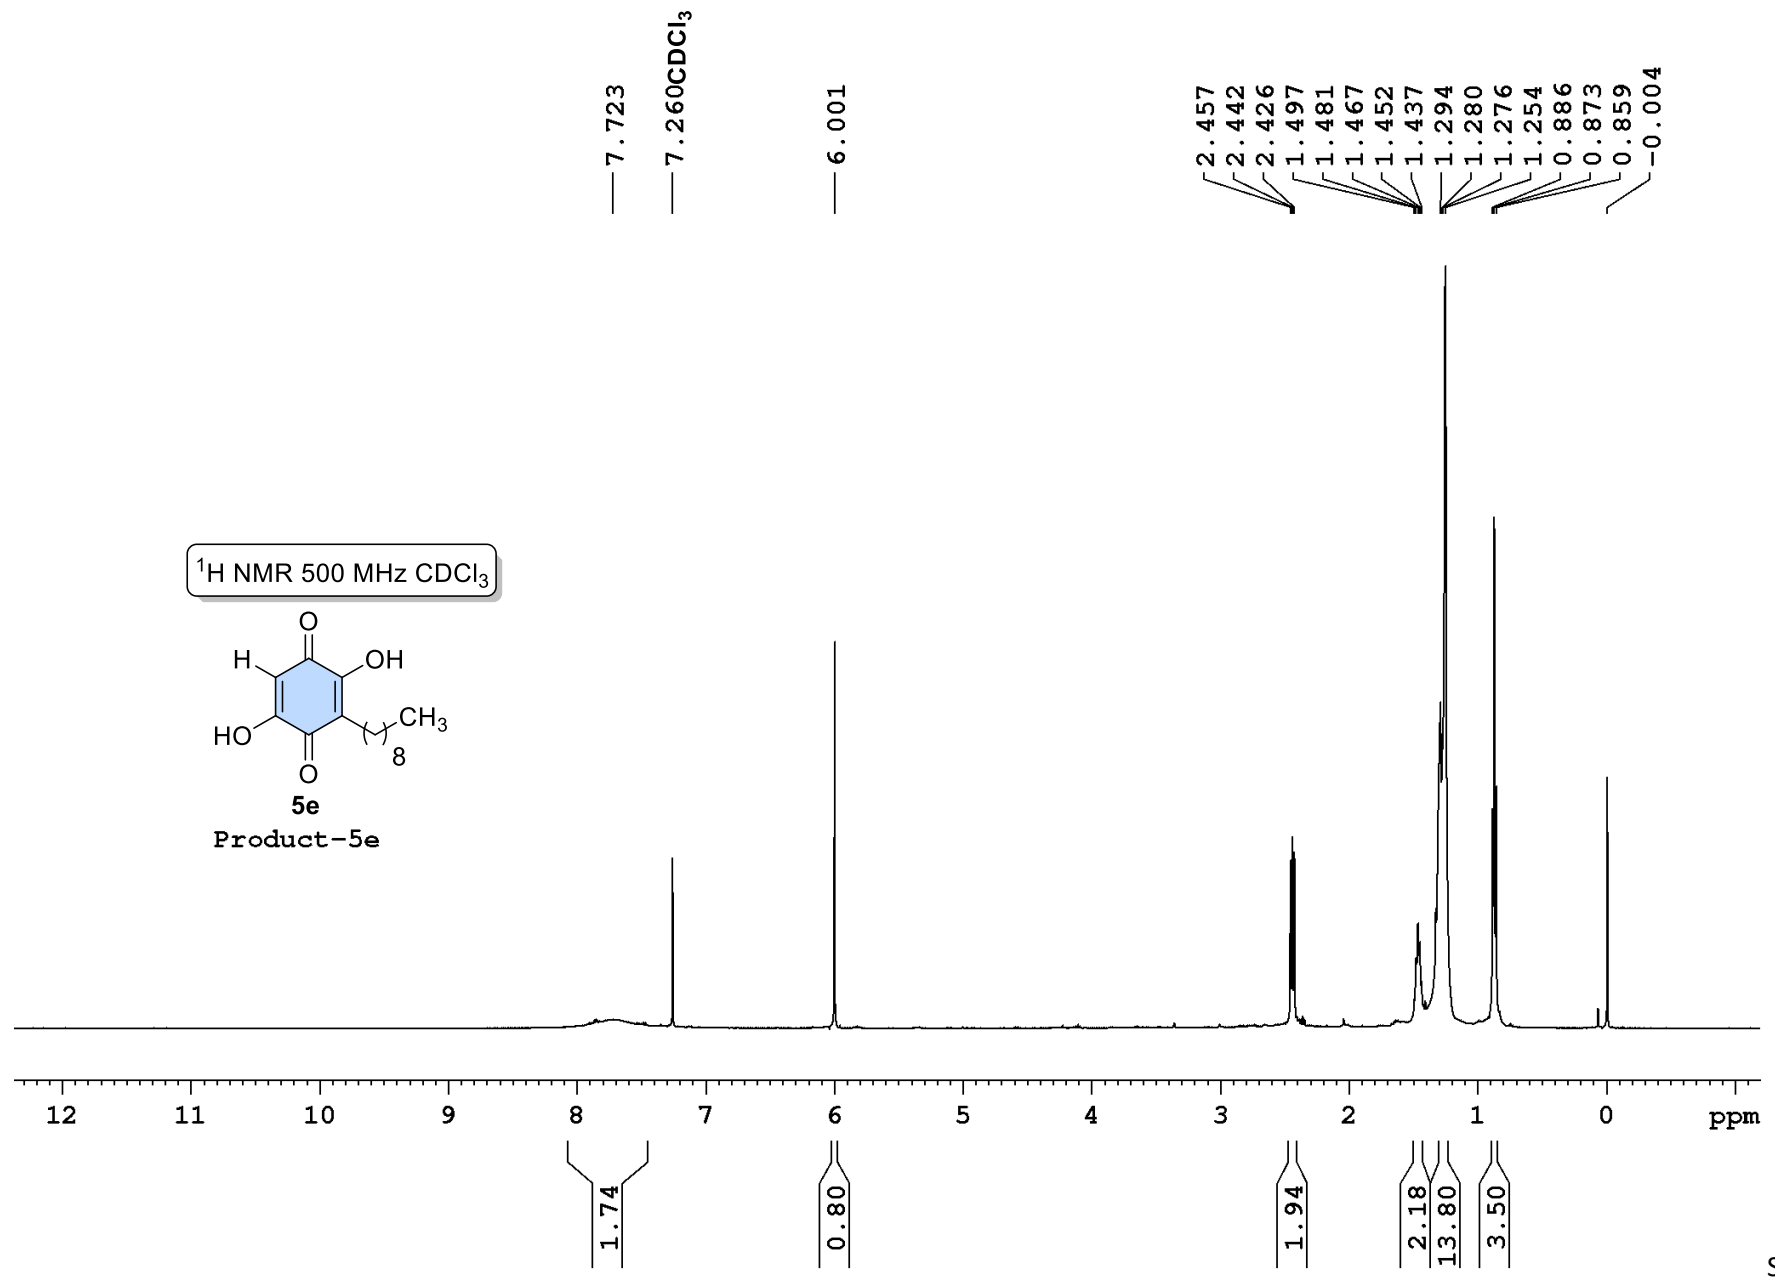

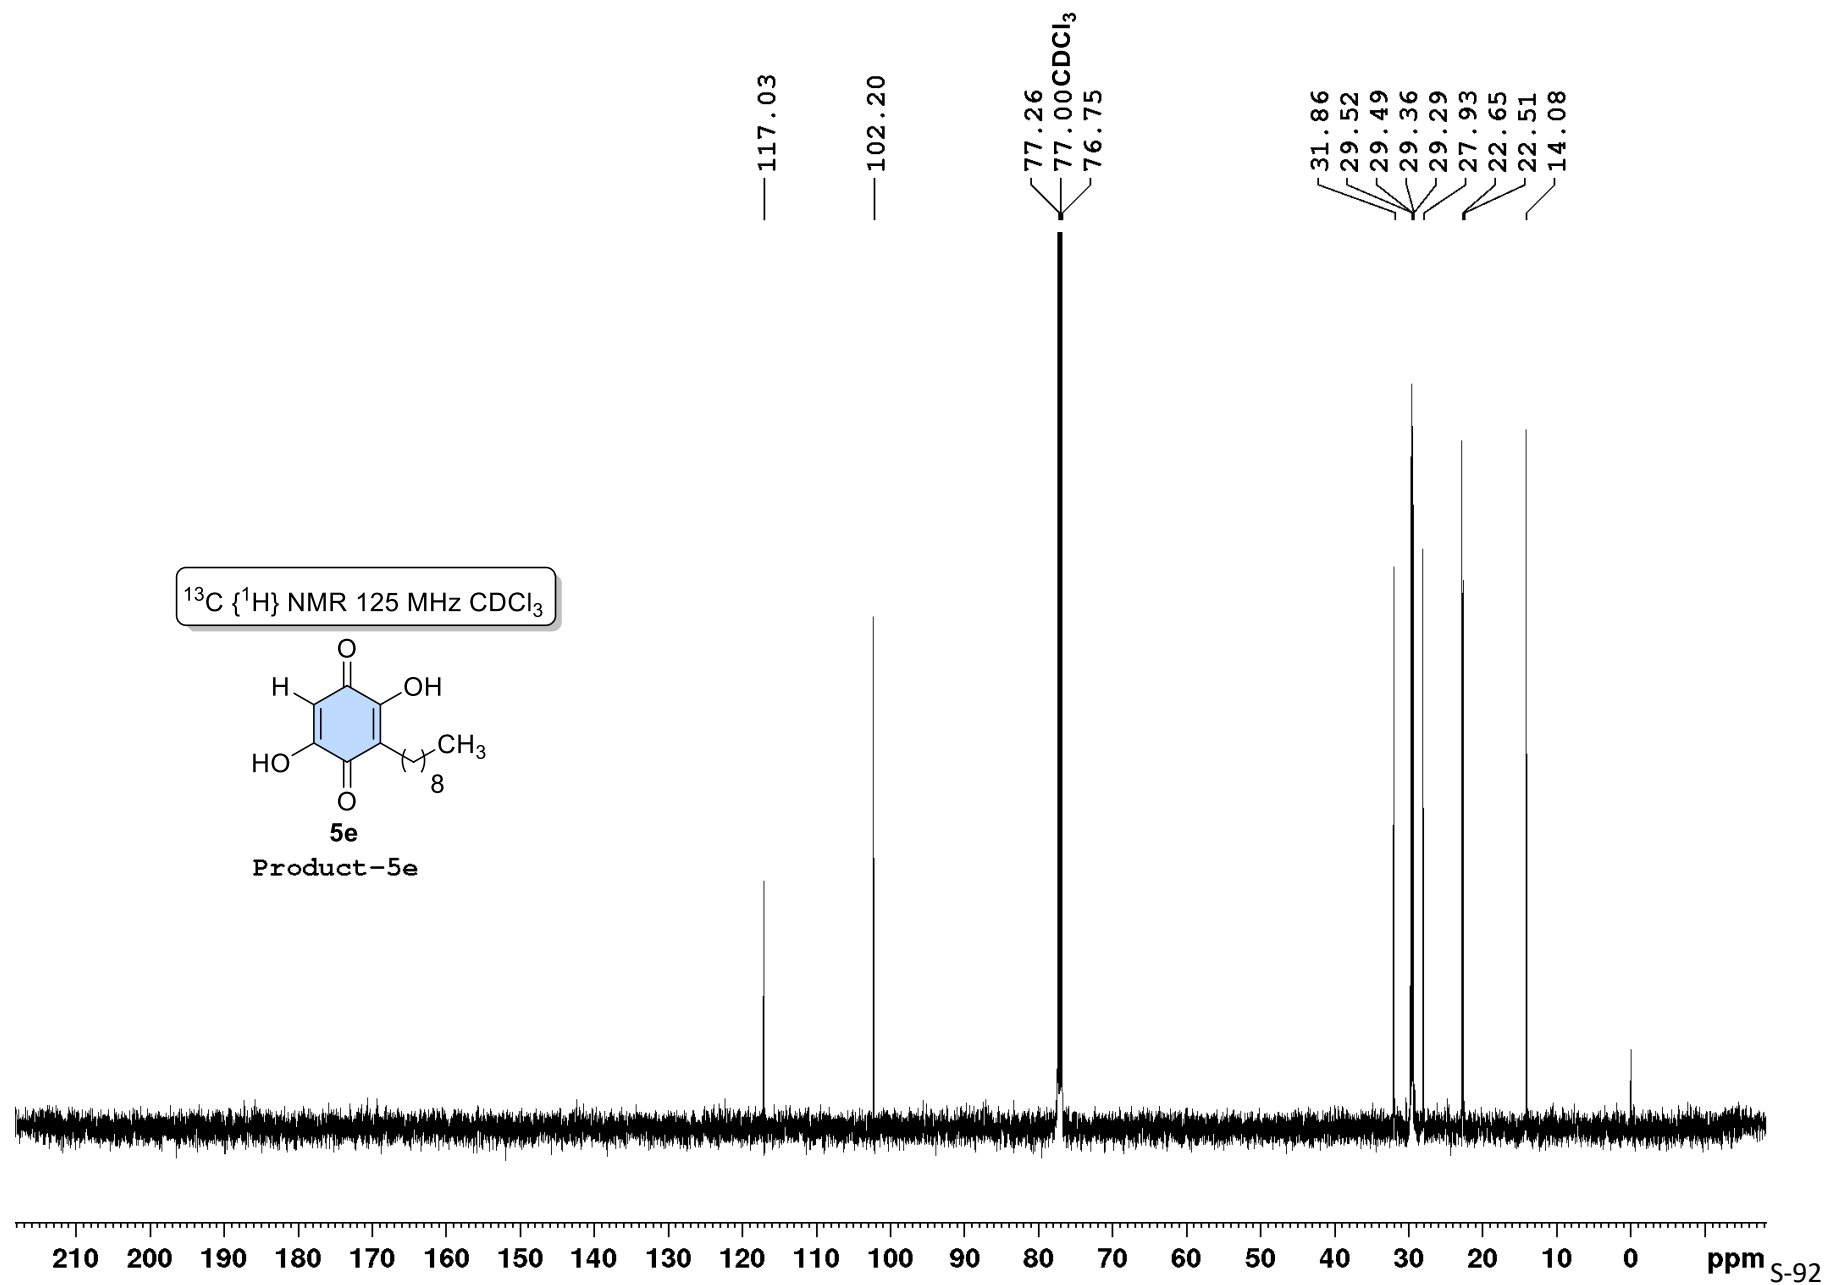

DEPT-135 125 MHz CDCl<sub>3</sub>

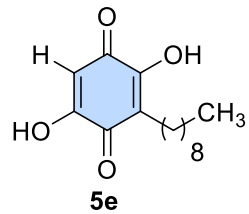

Product-5e

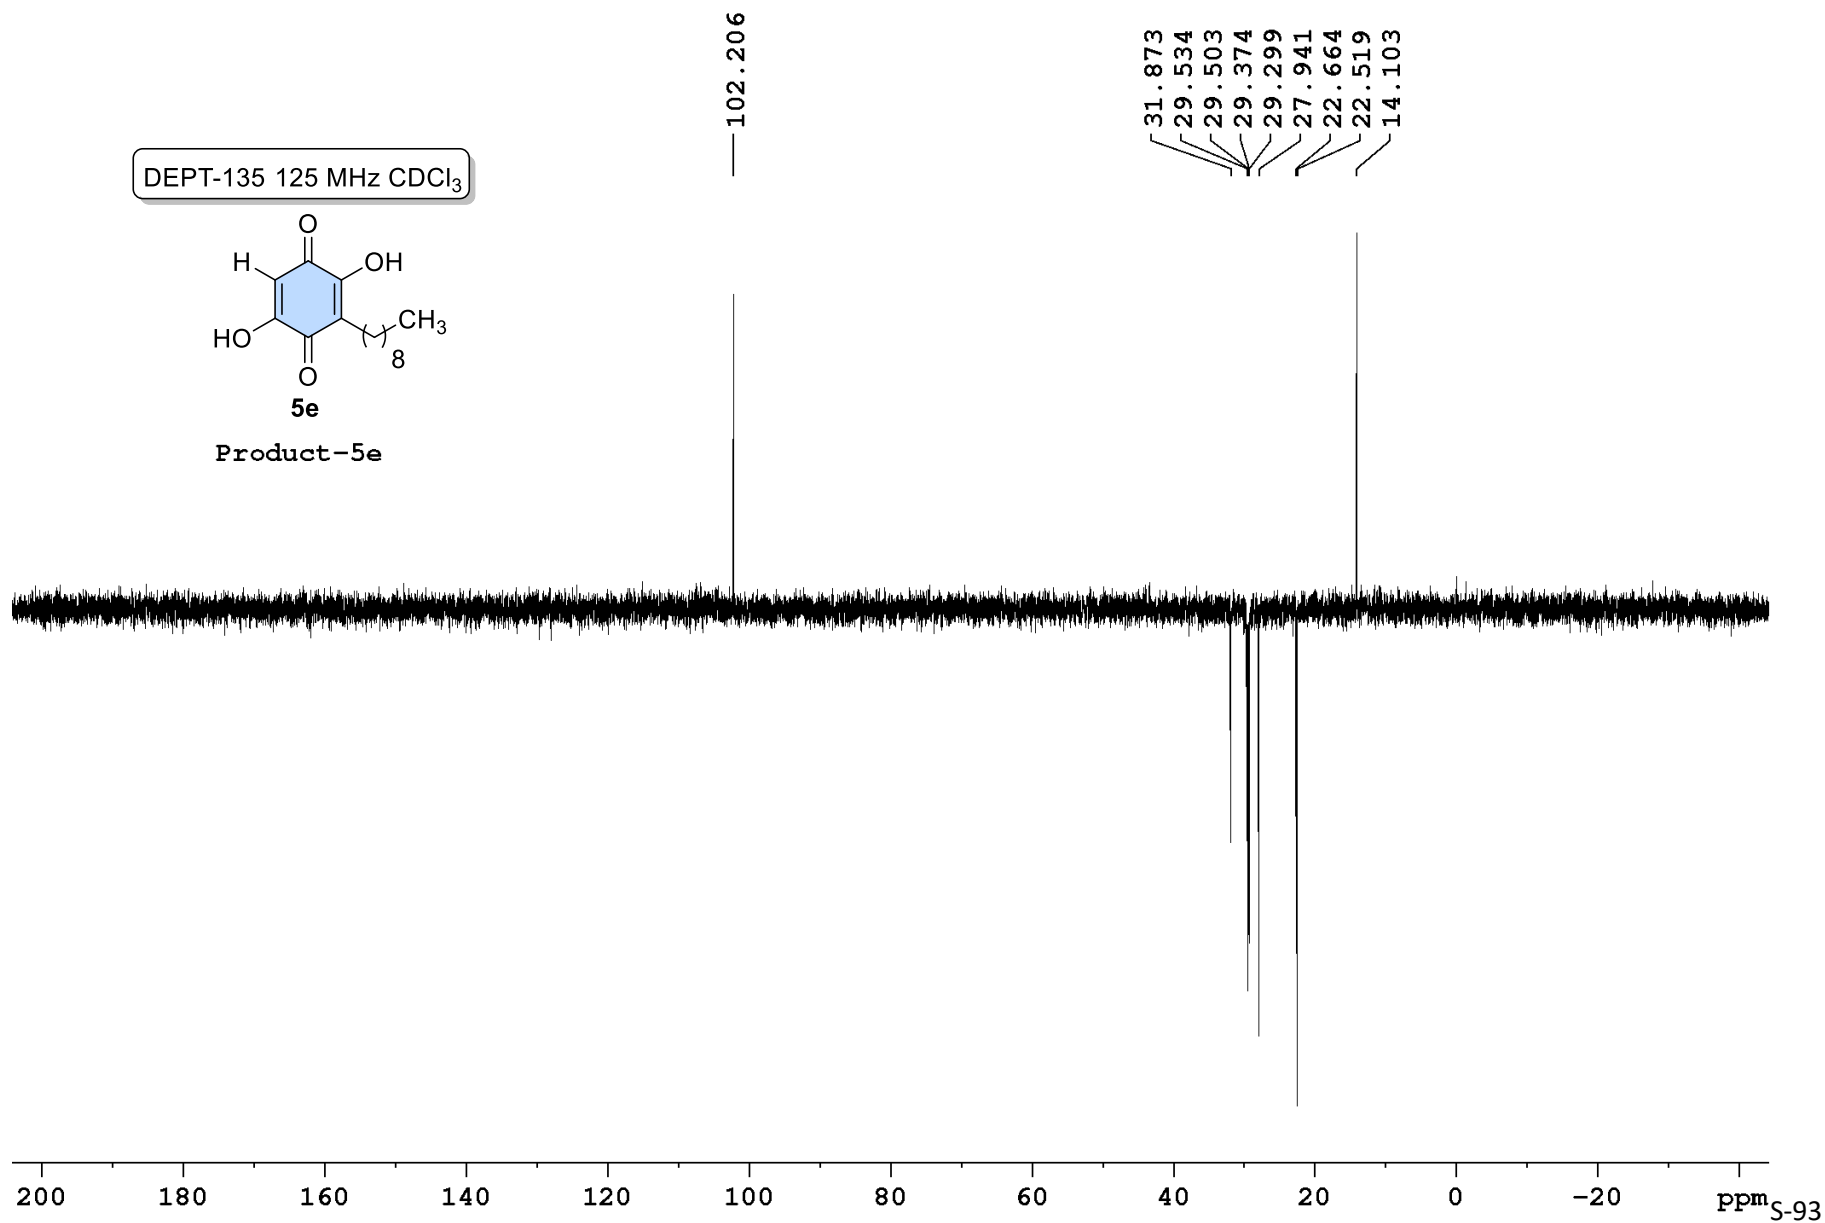

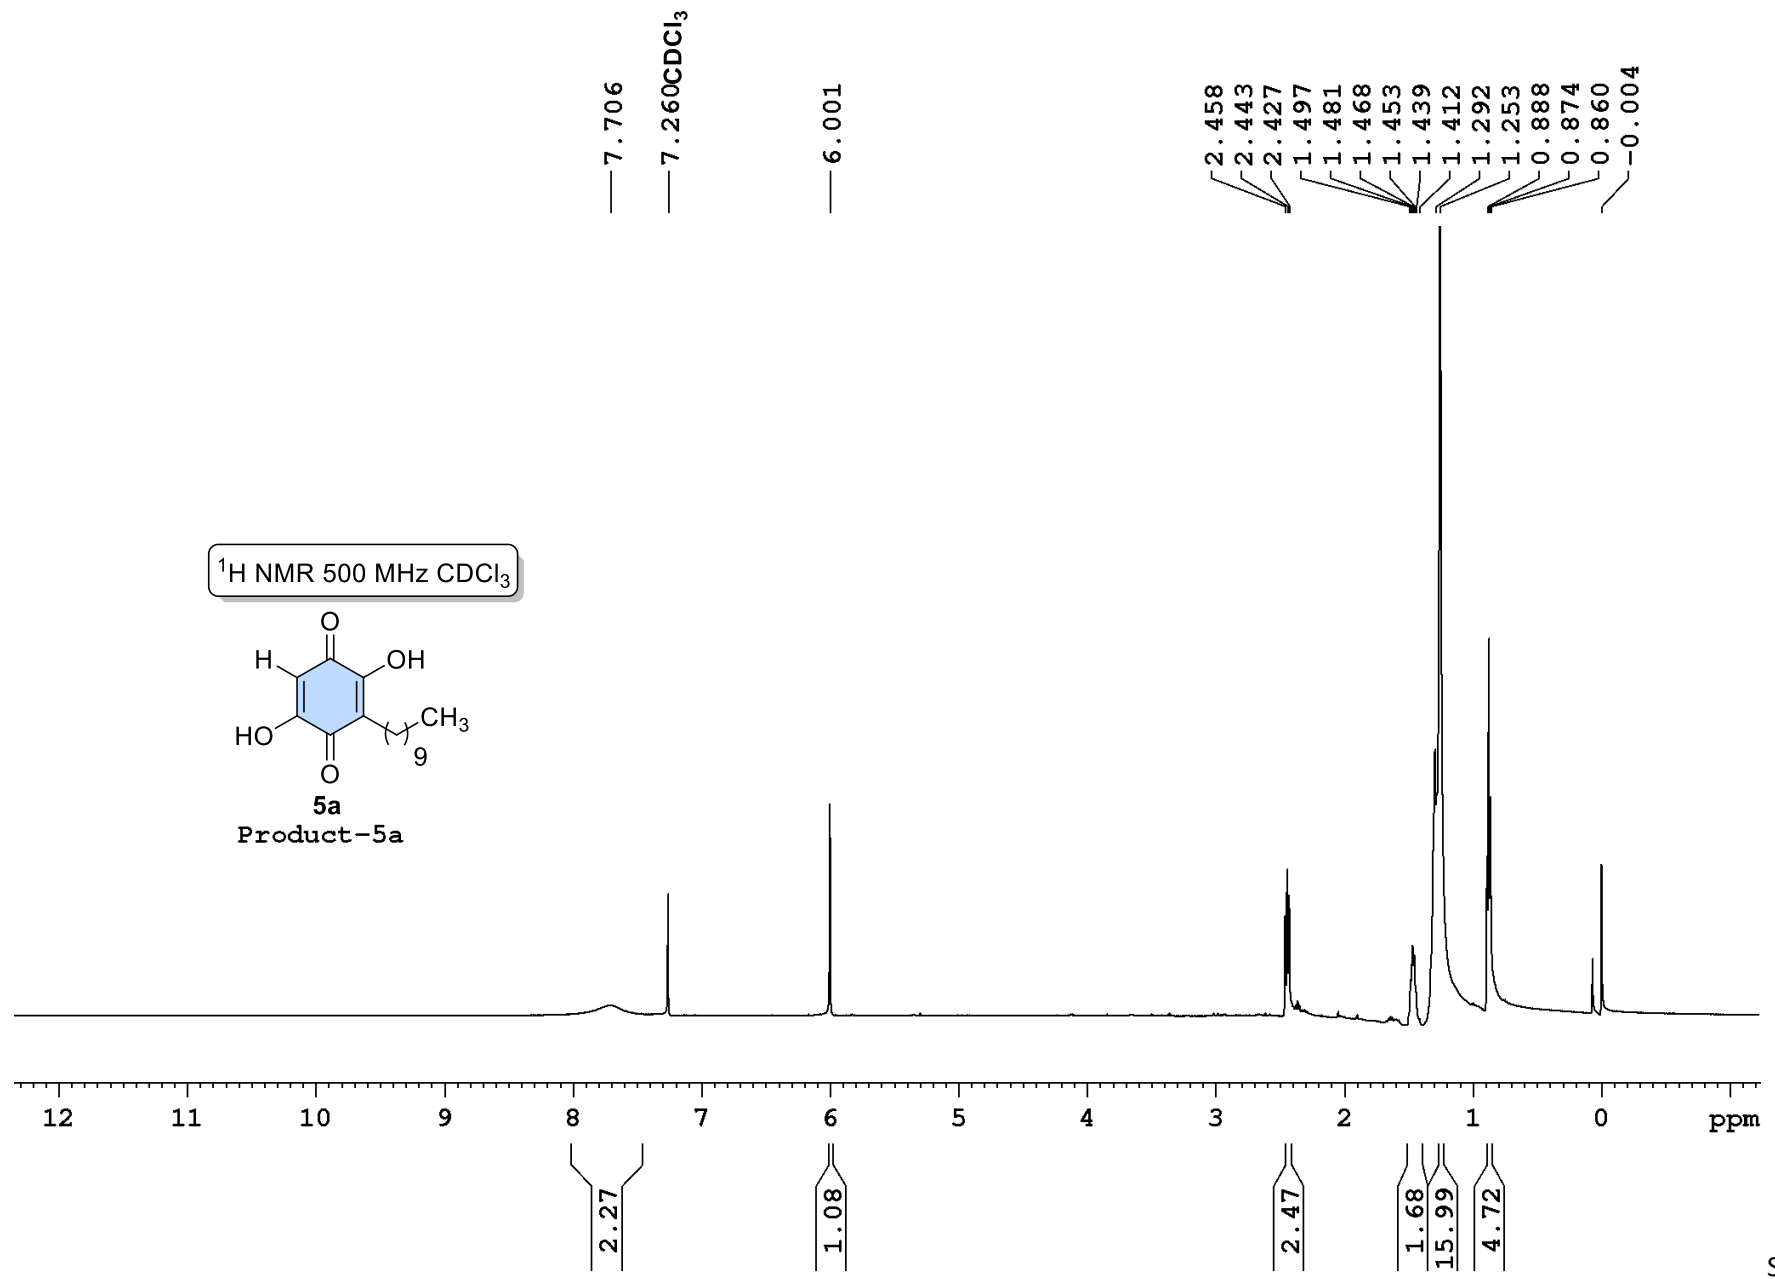

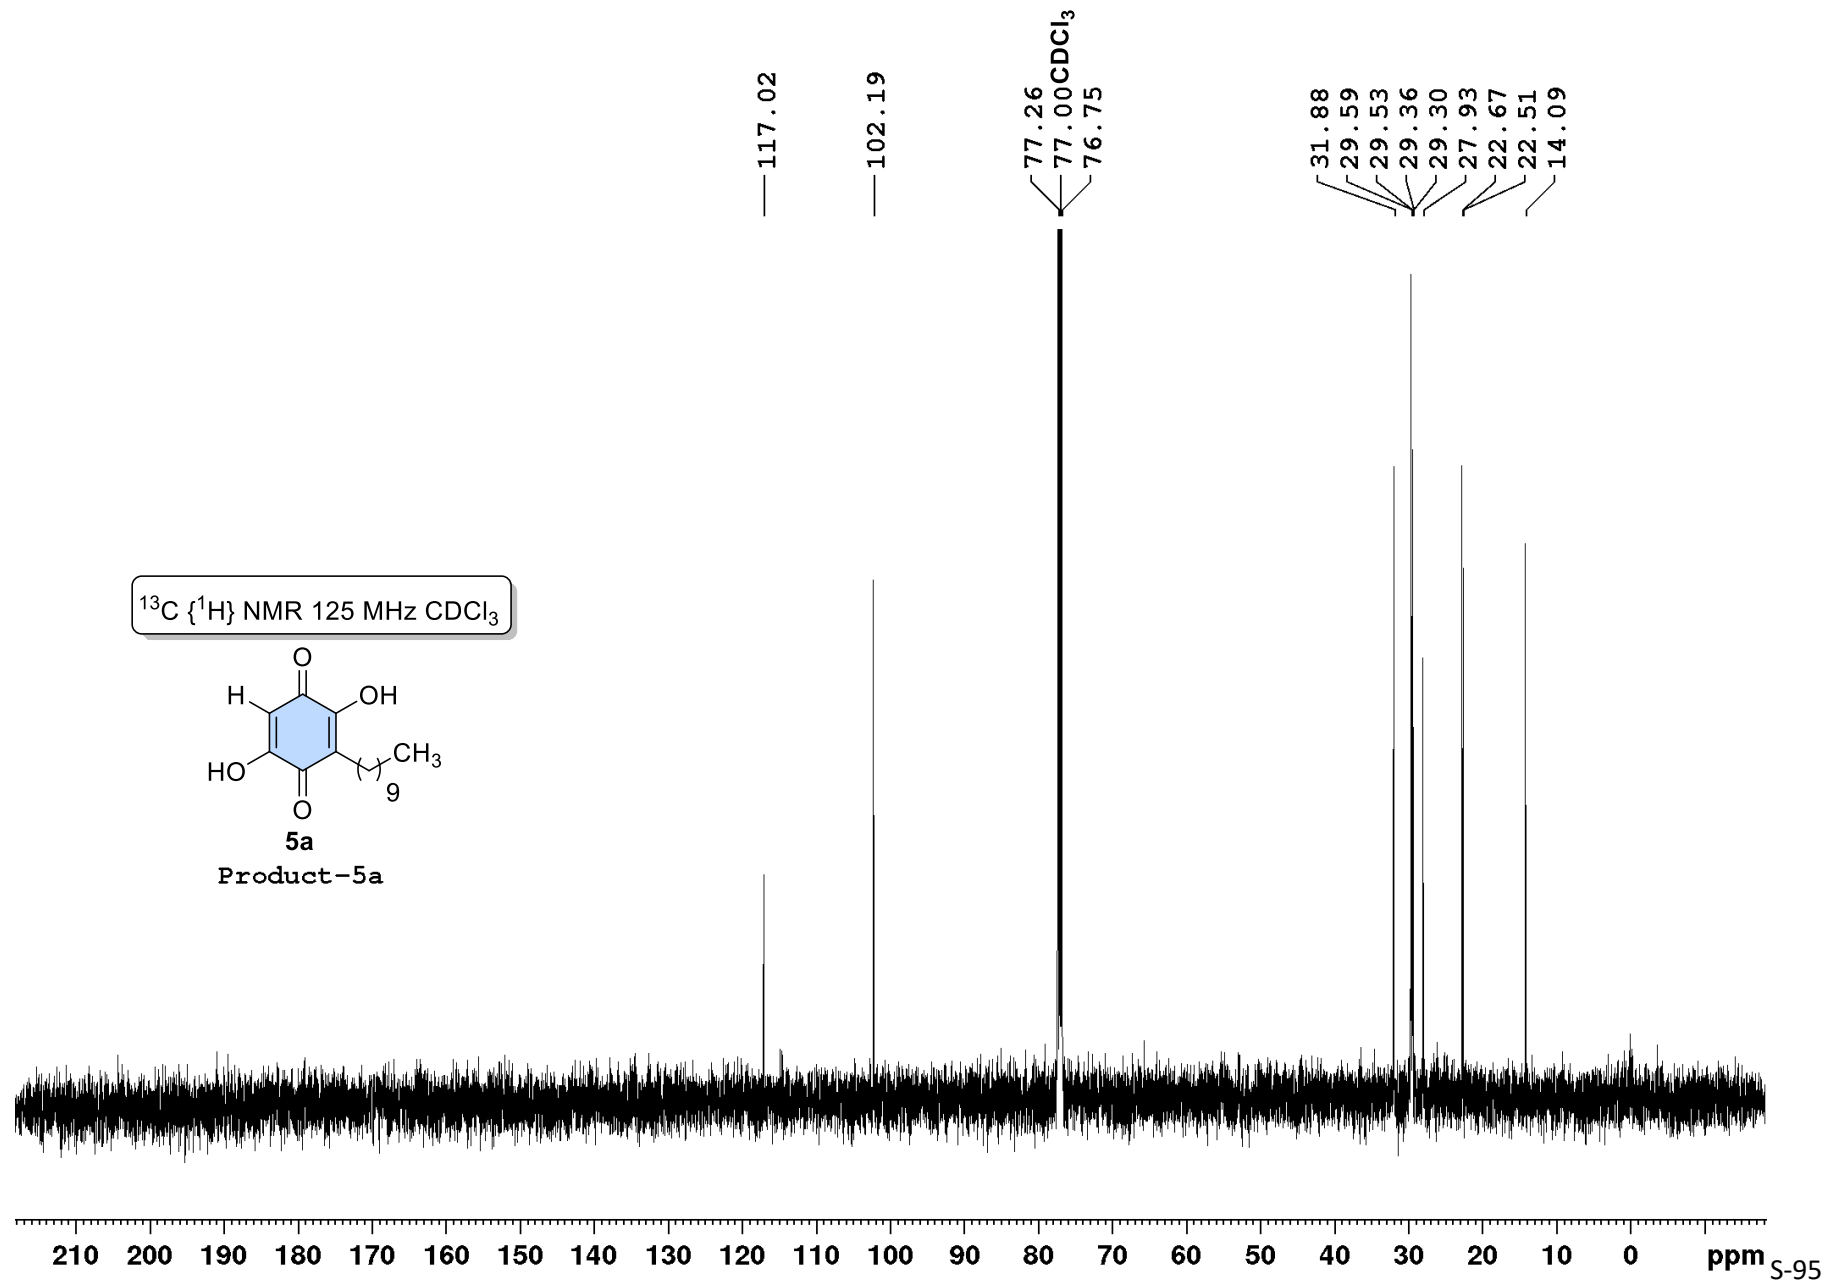

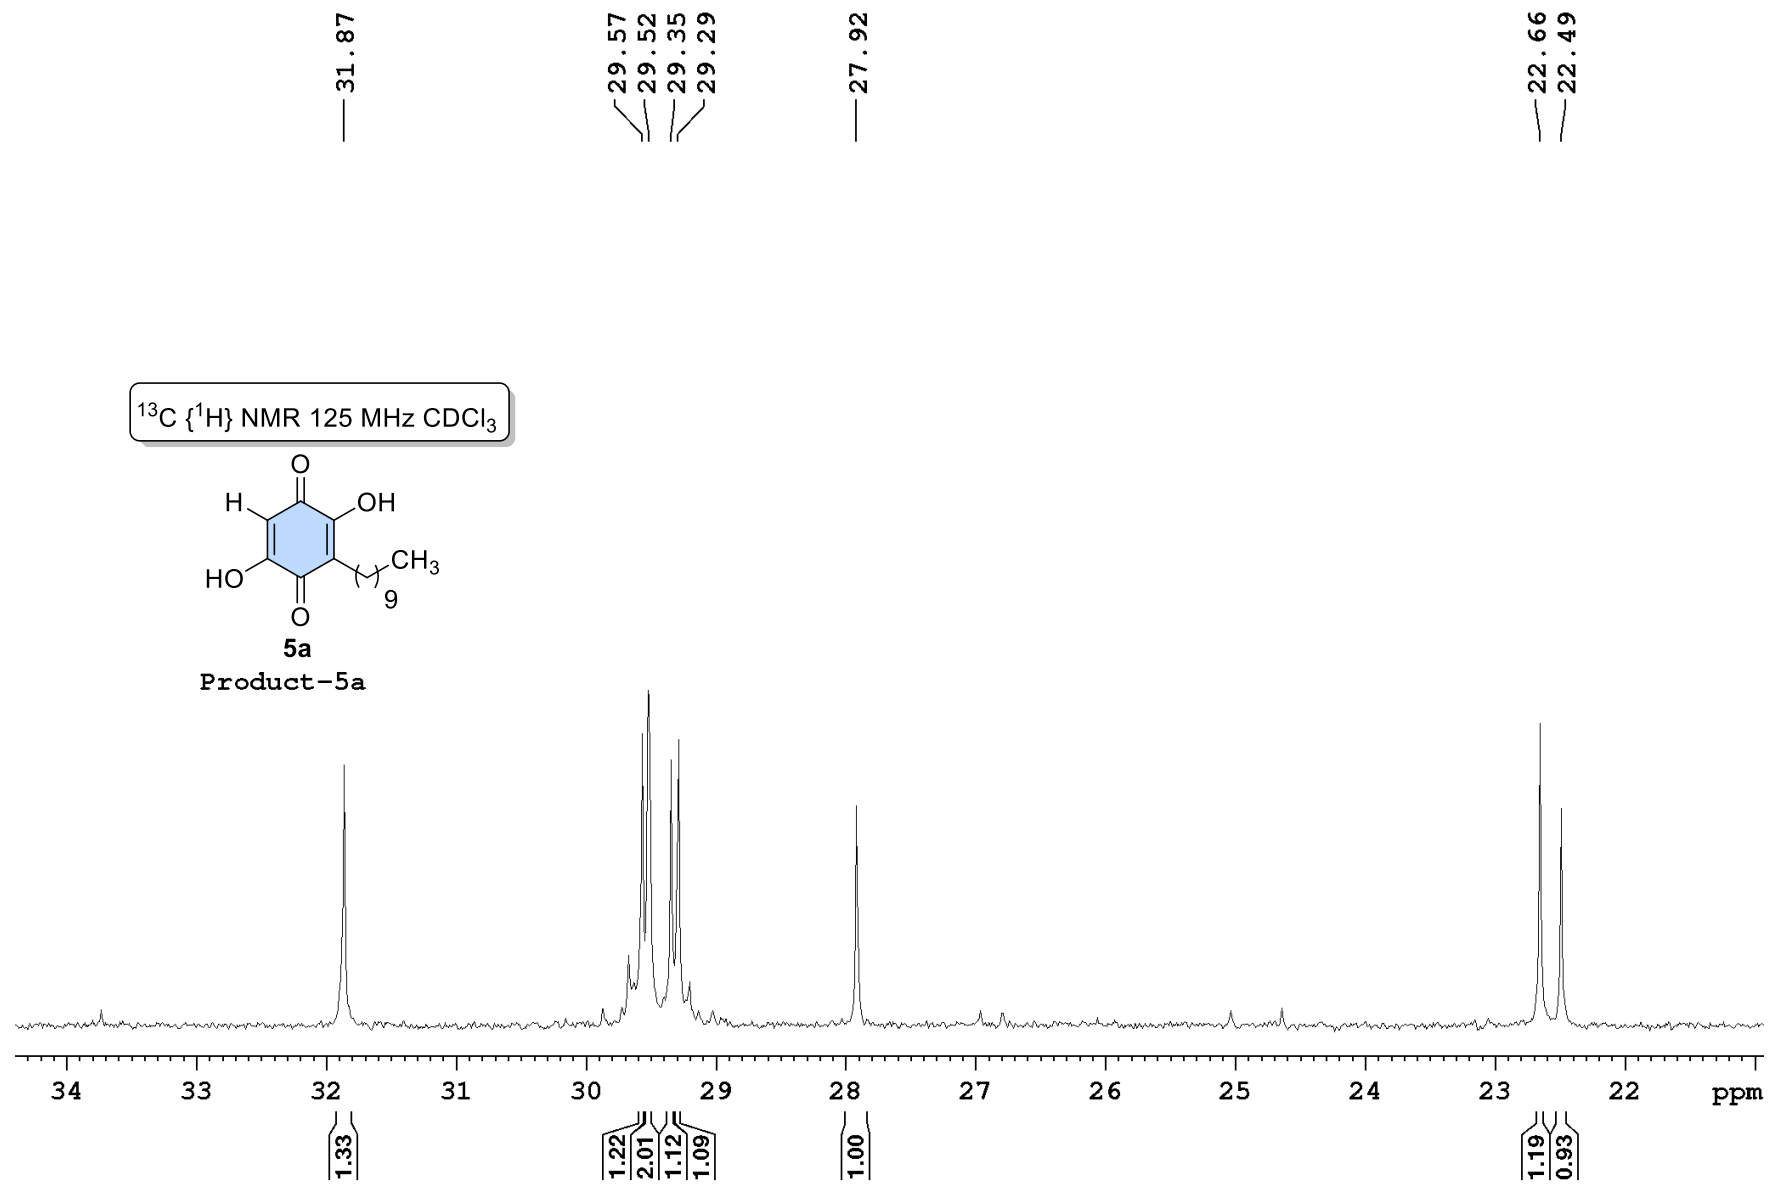



DEPT-135 125 MHz CDCl<sub>3</sub>

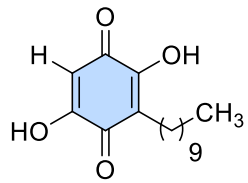

5a

Product-5a

— 102.181

31.867  
29.571  
29.521  
29.349  
29.294  
27.916  
22.659  
22.494  
14.088

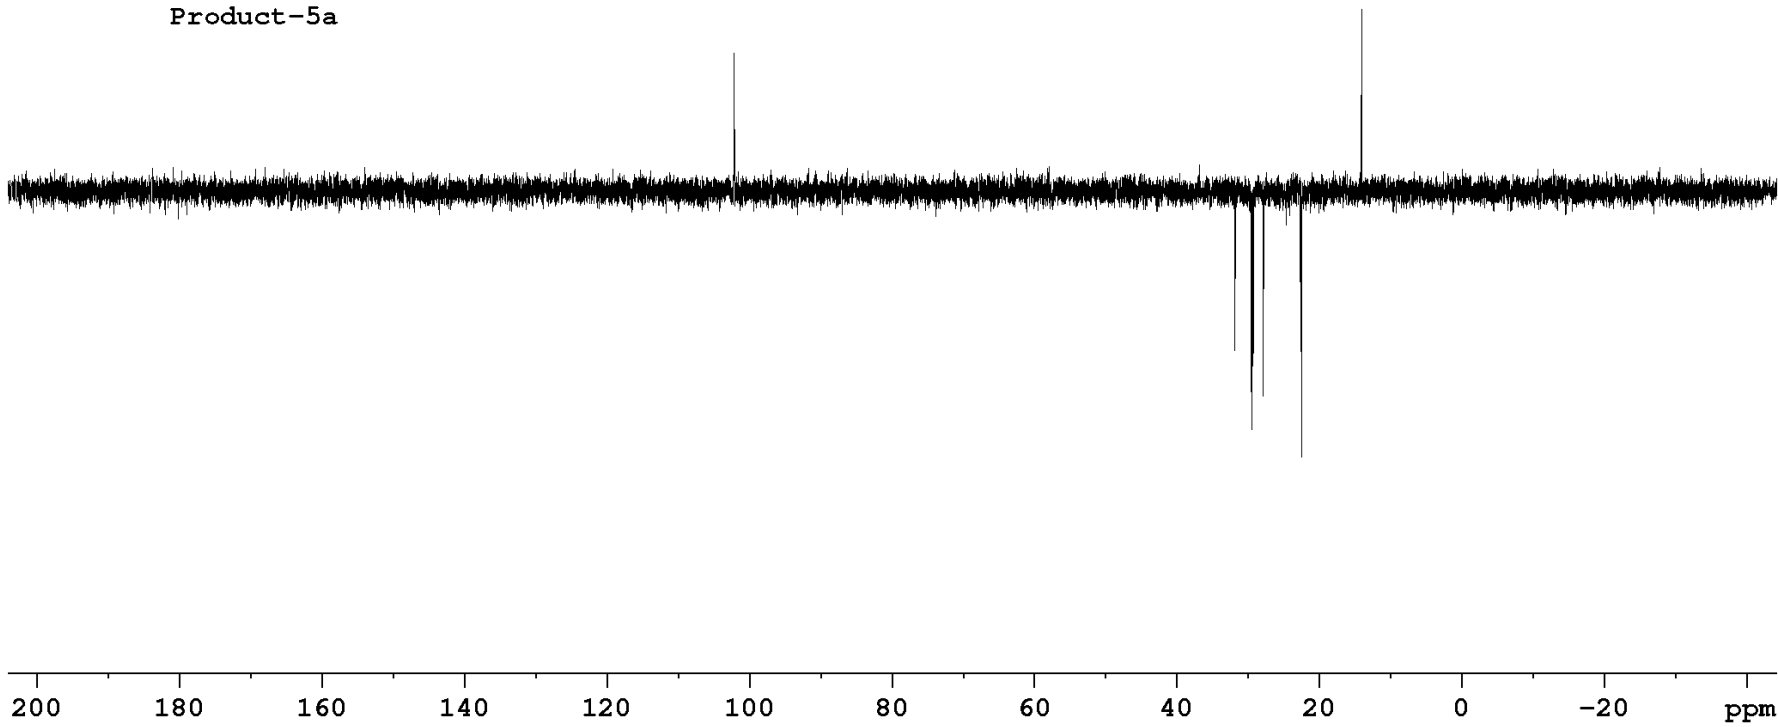

<sup>1</sup>H NMR 500 MHz CDCl<sub>3</sub>

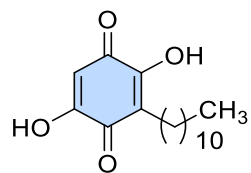

5f

Product-5f

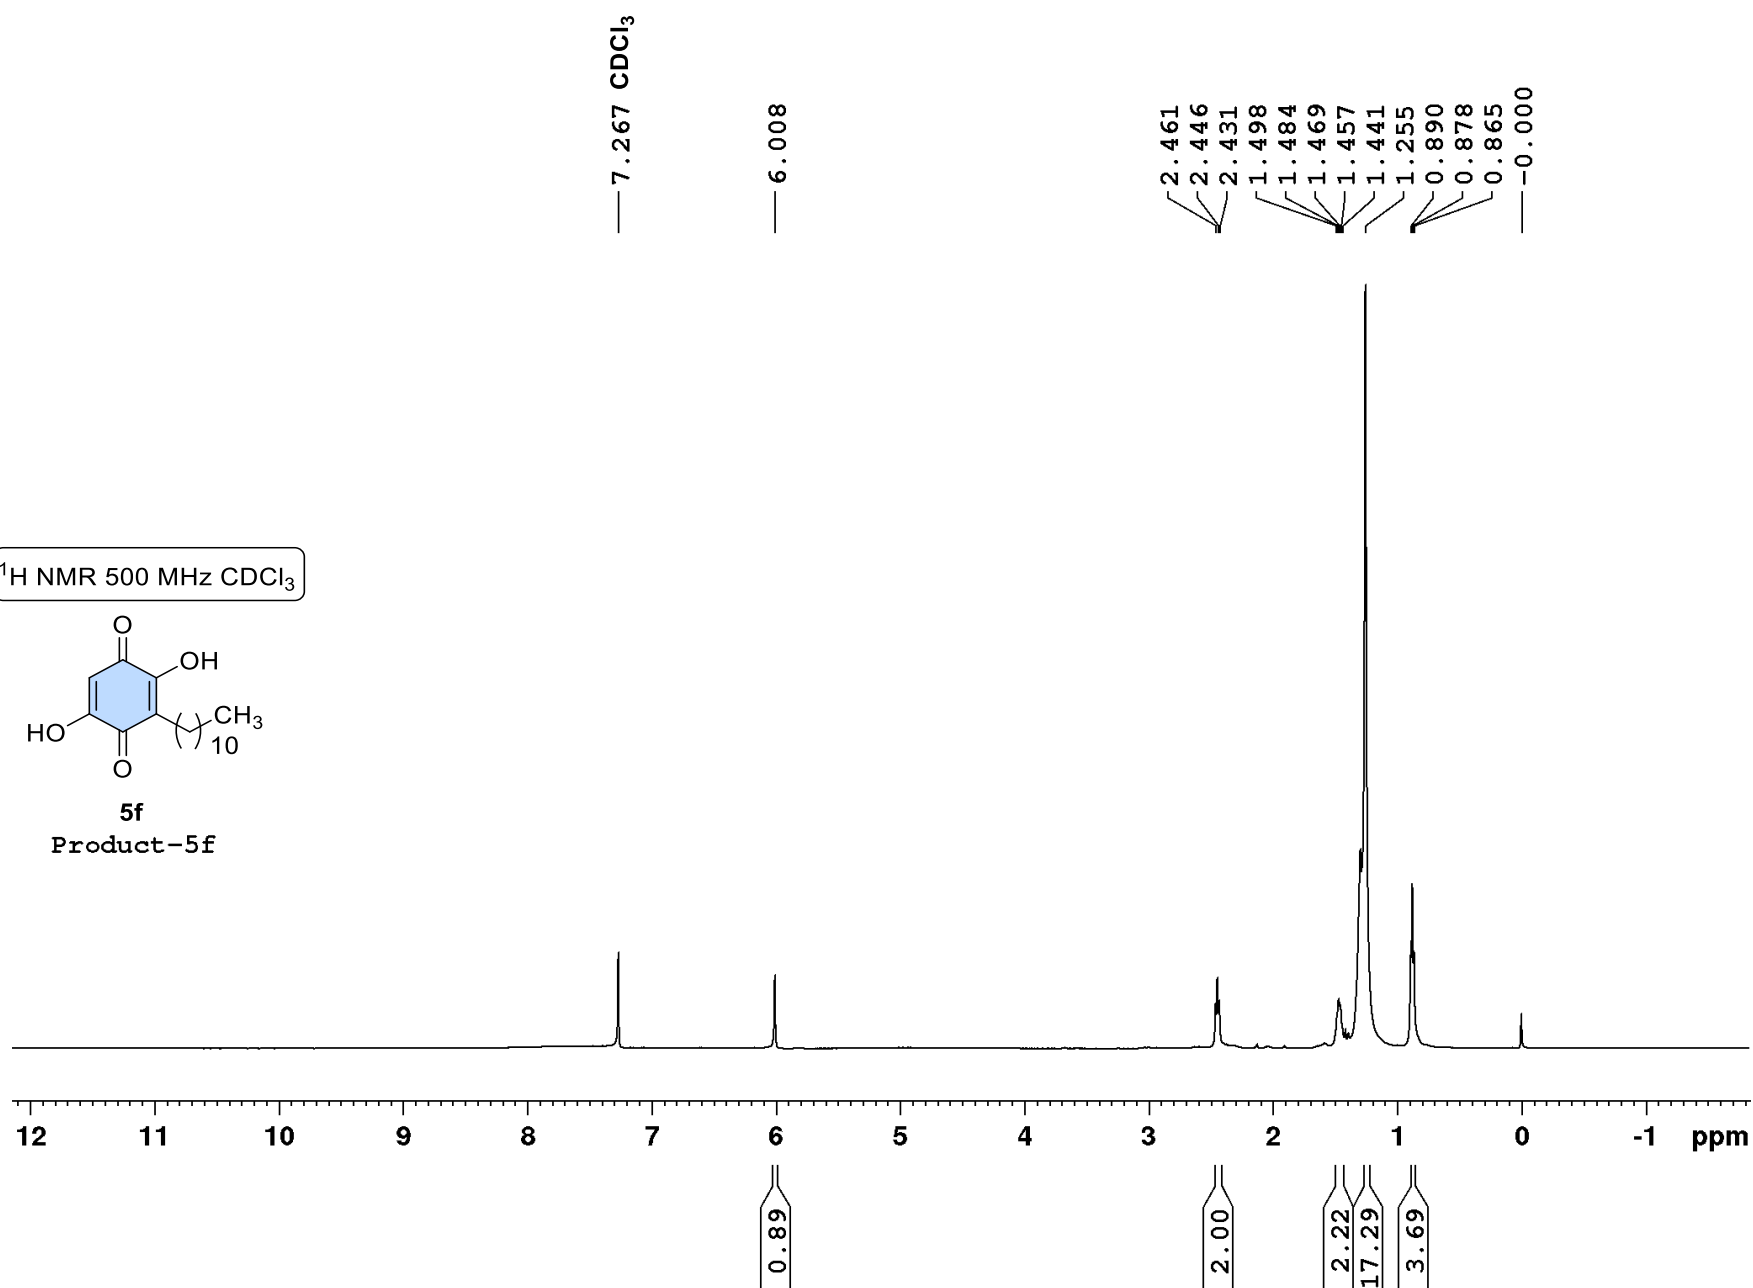

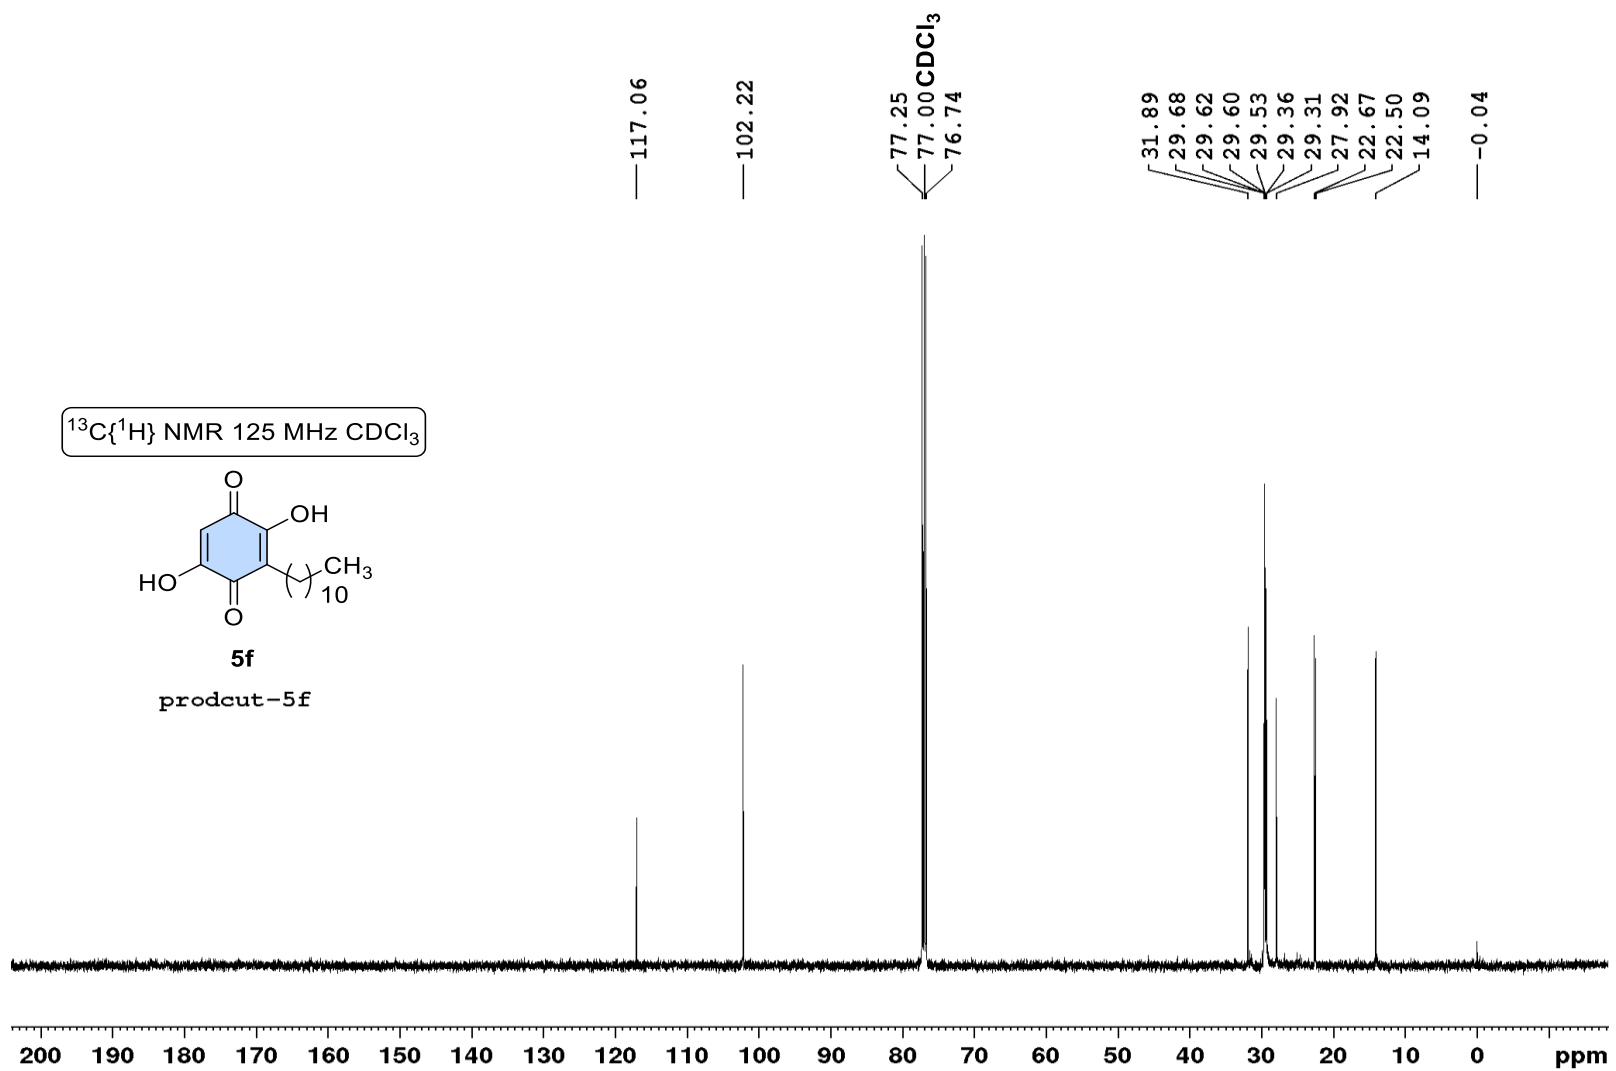

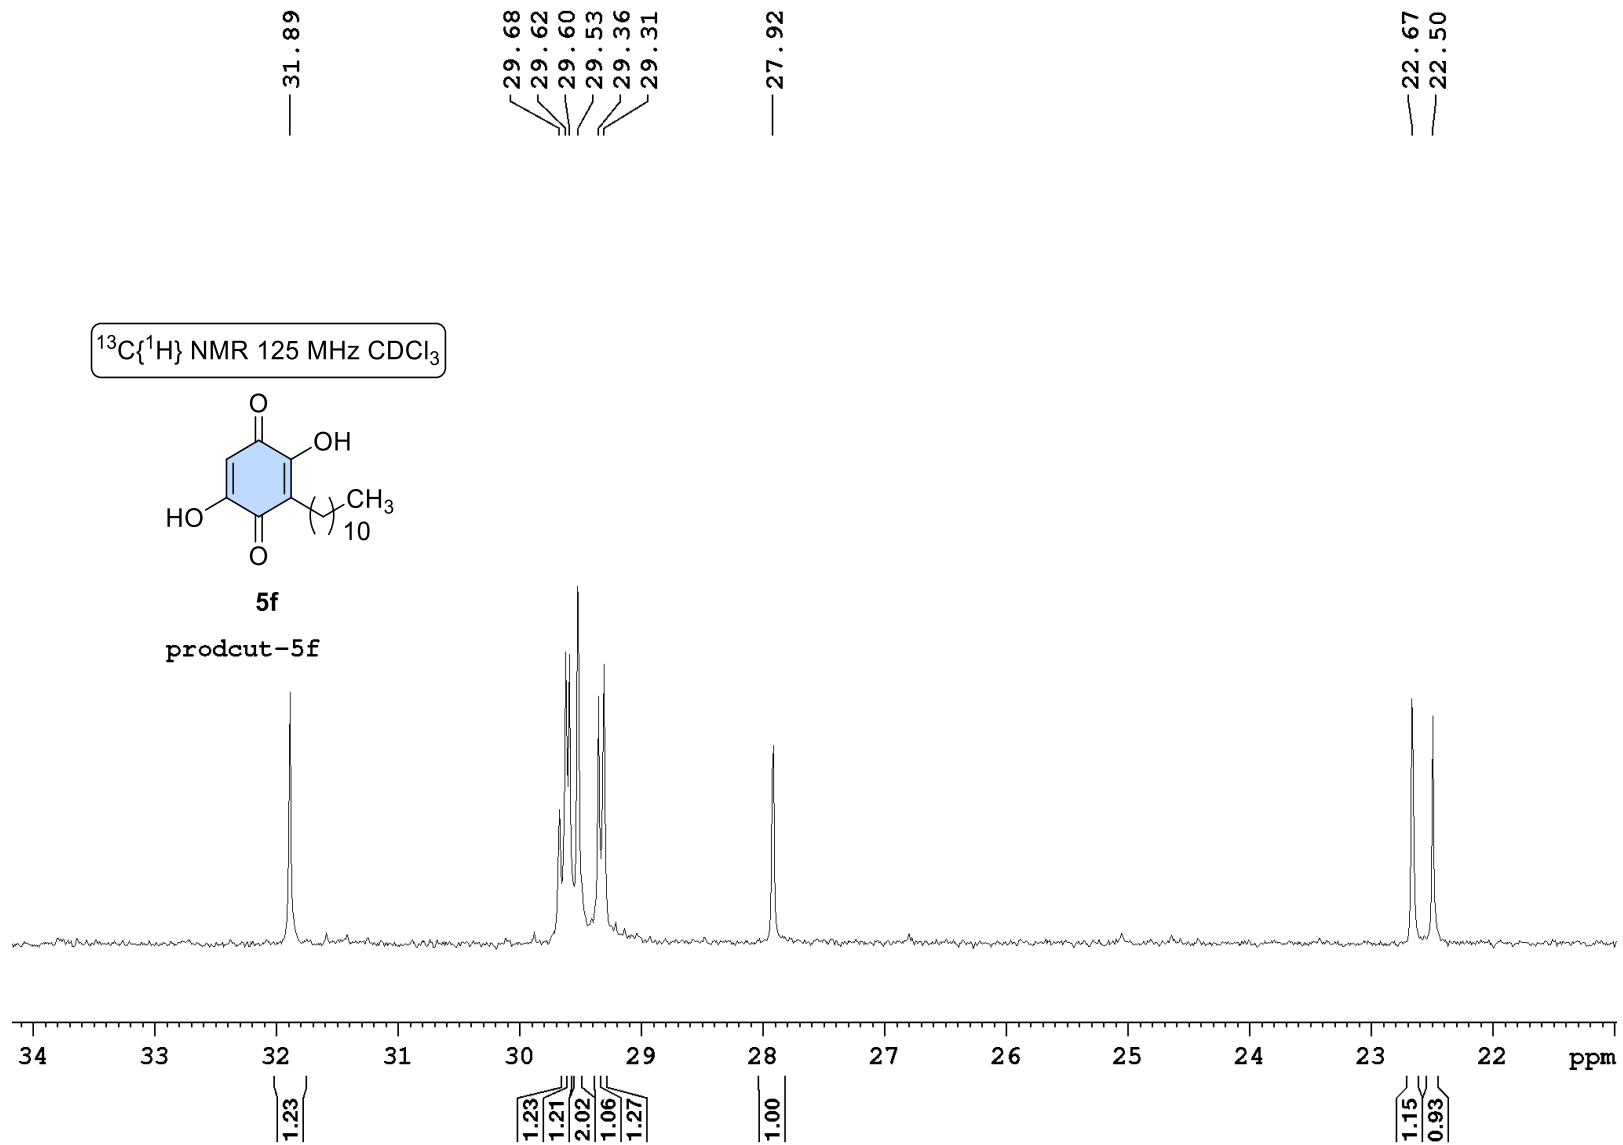

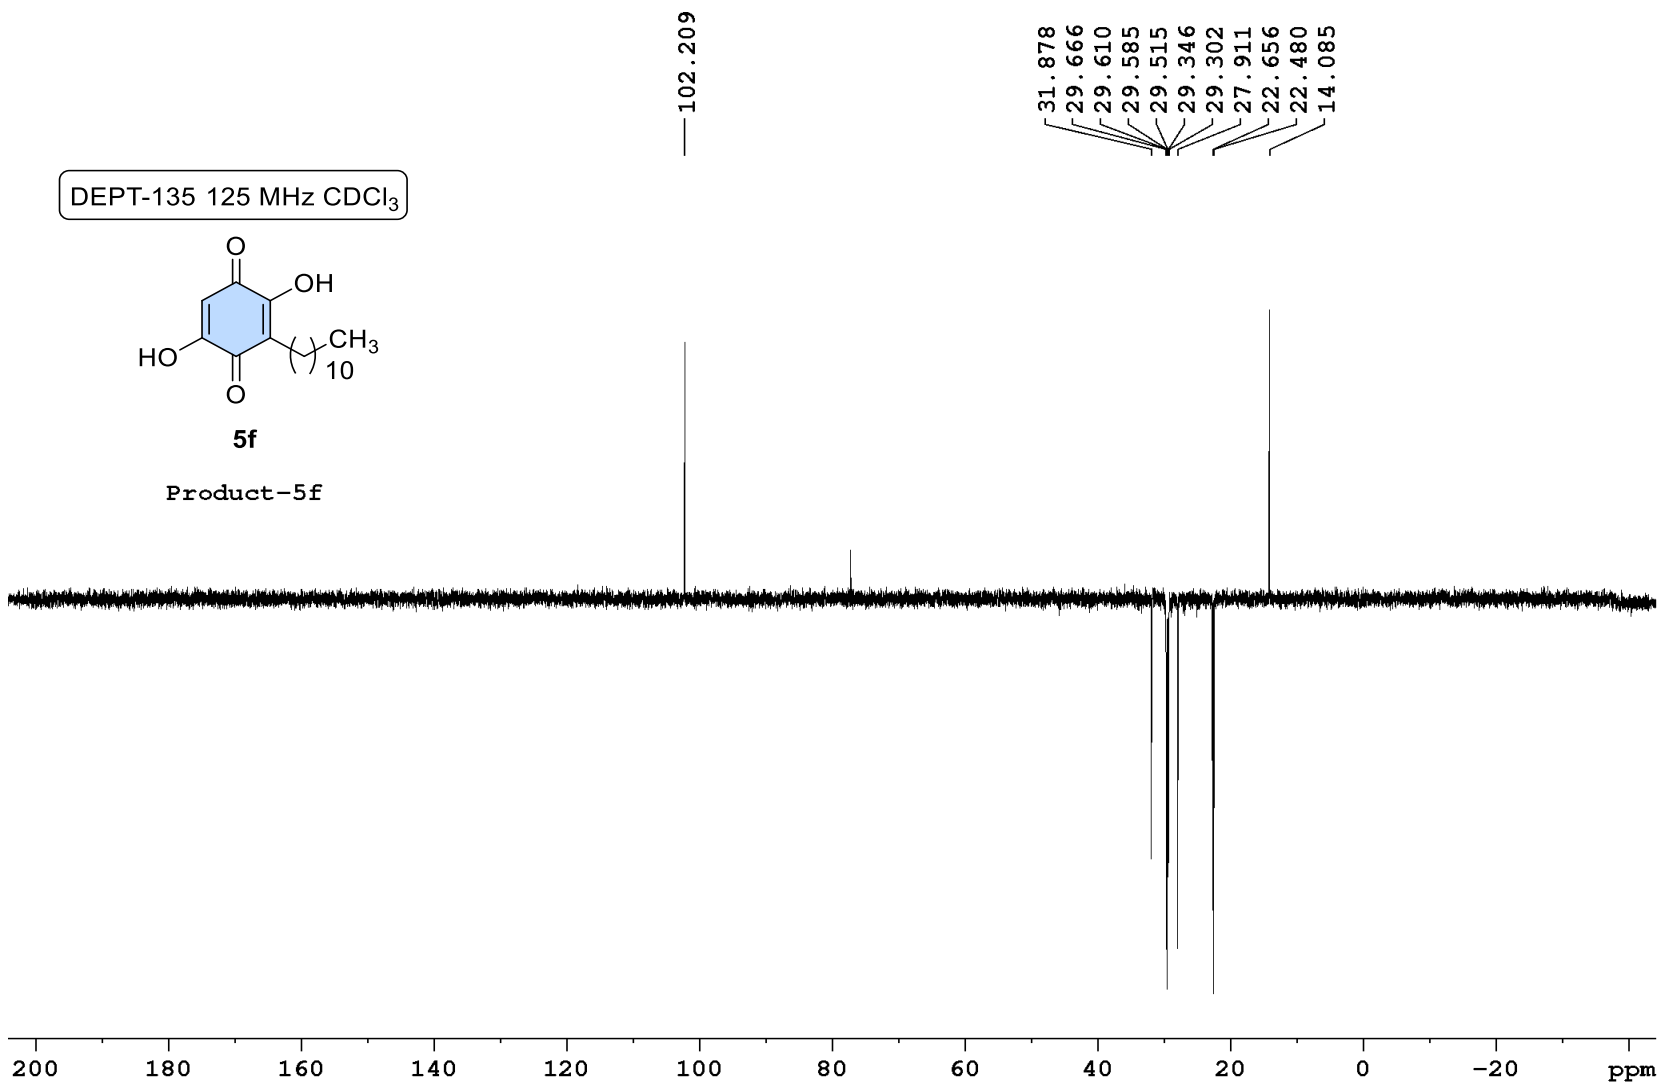

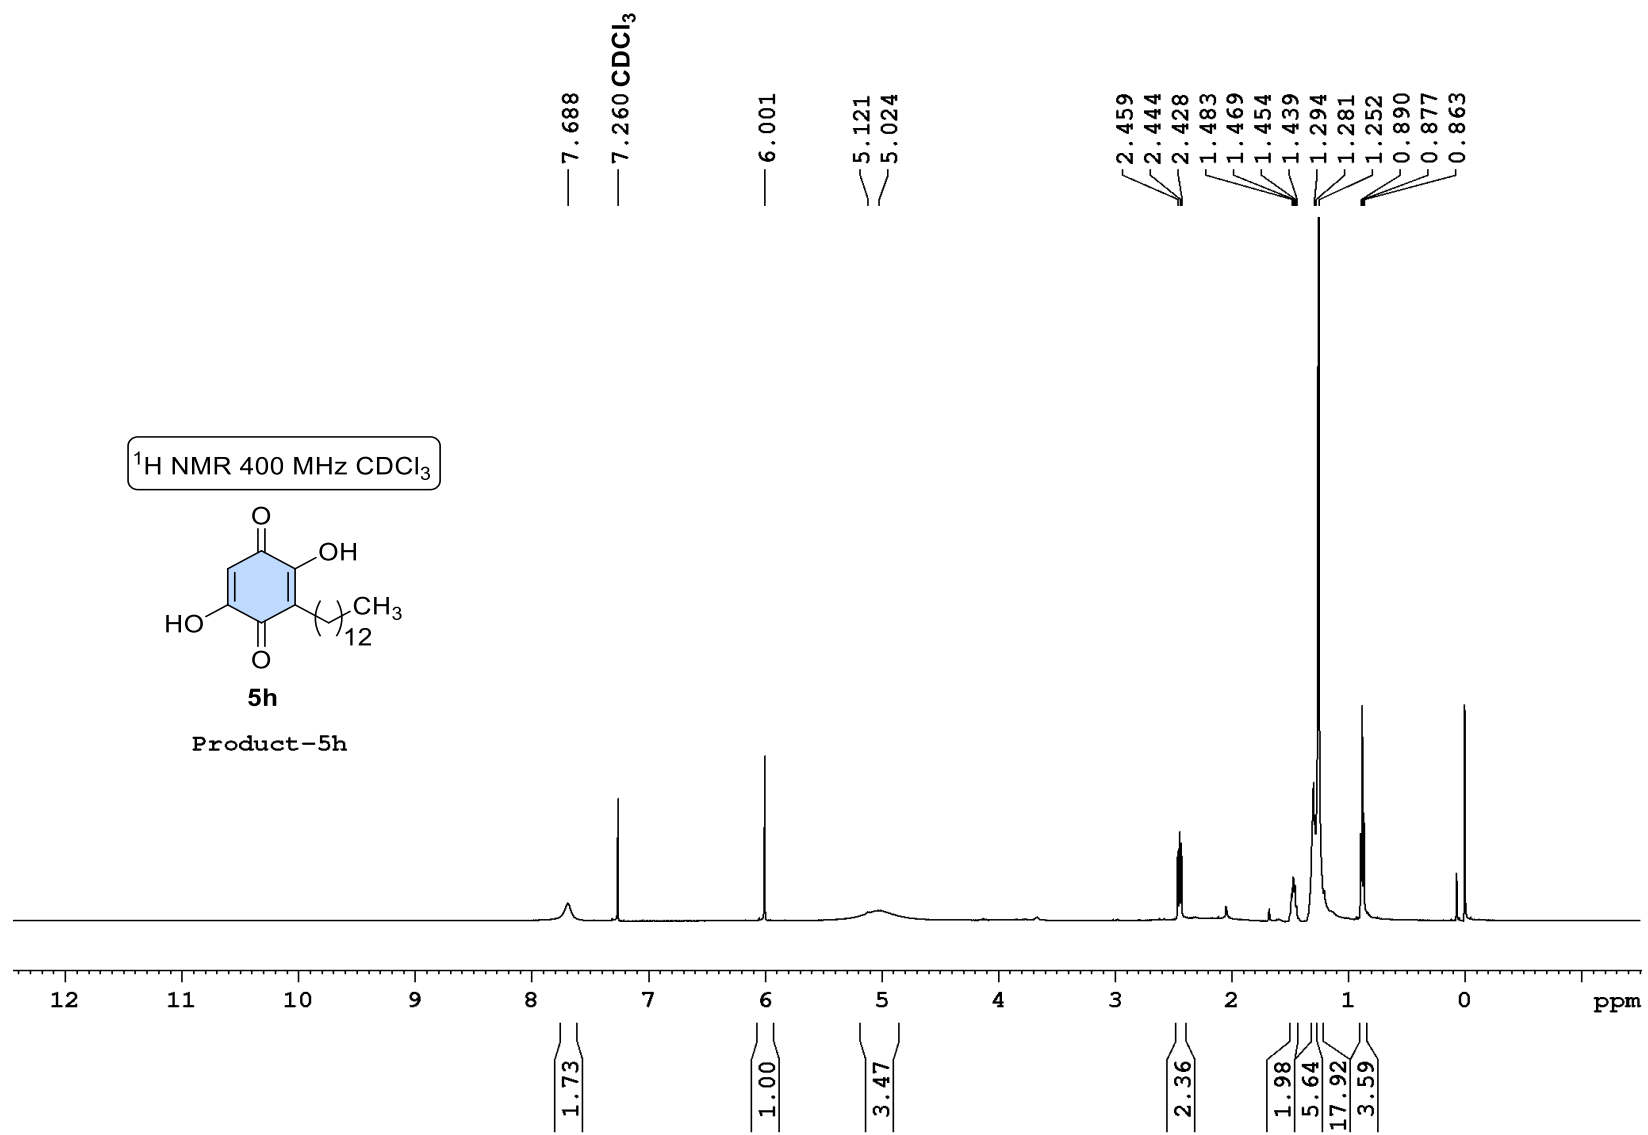

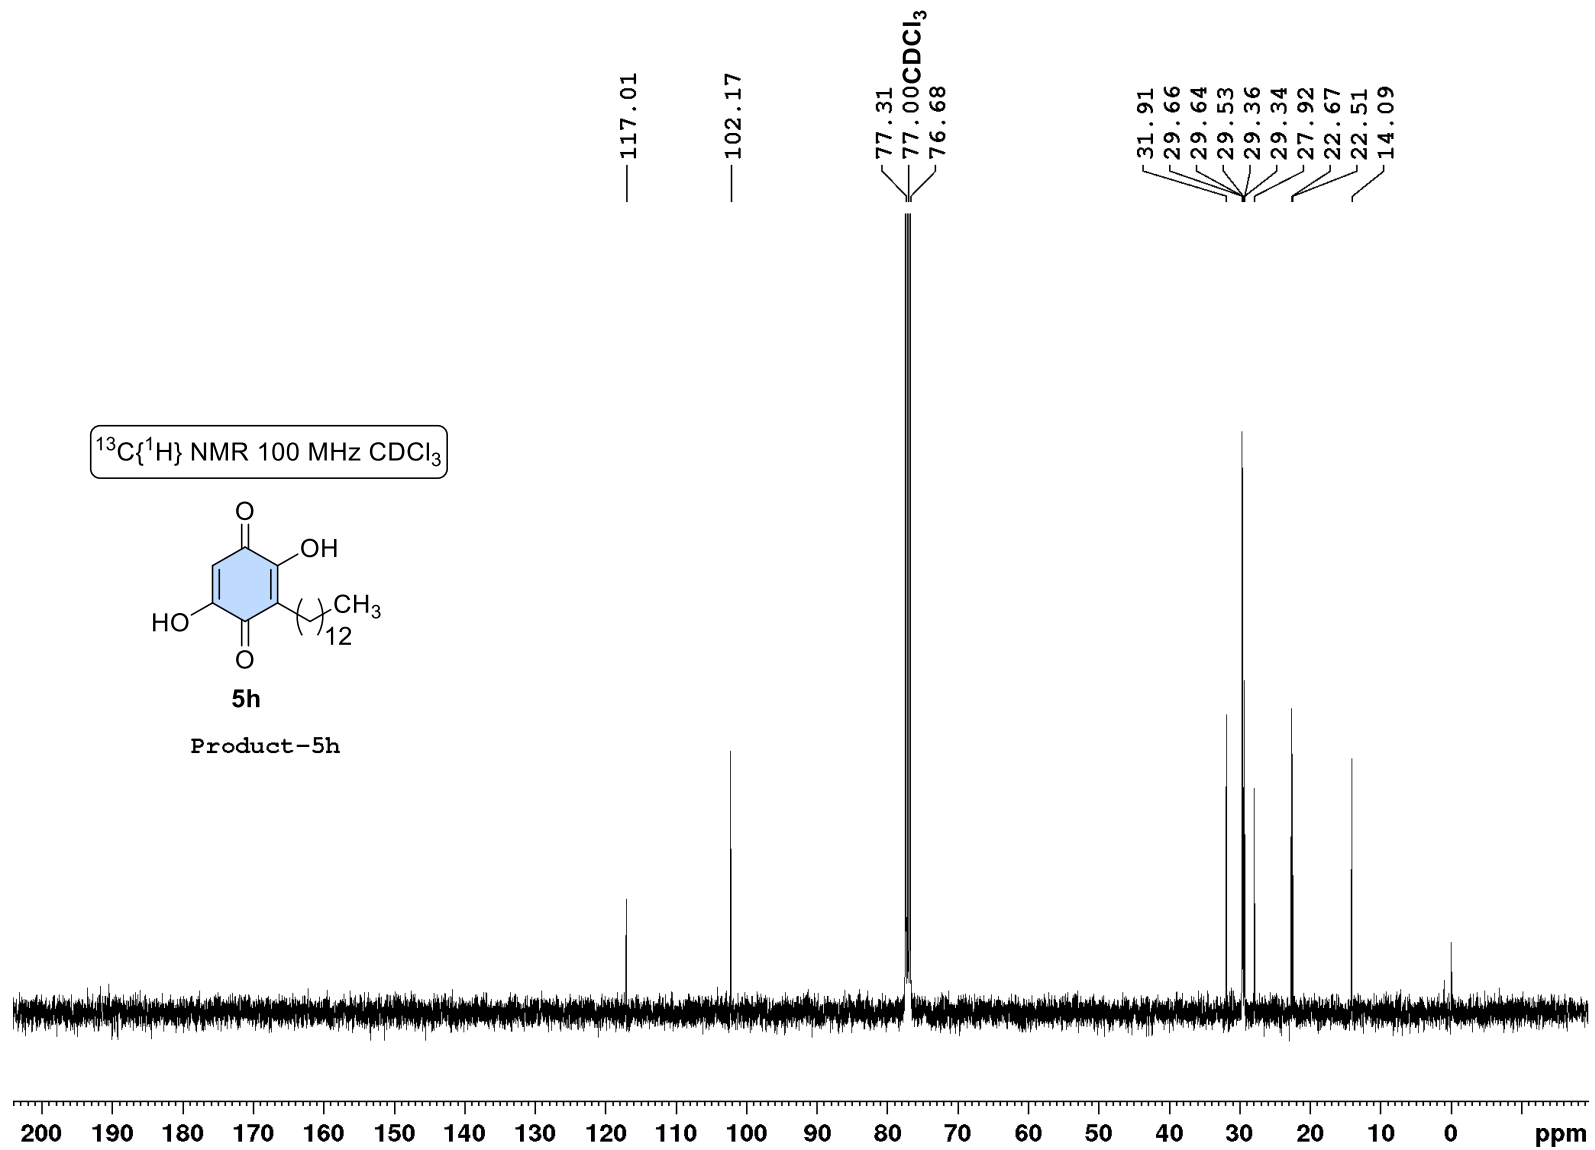

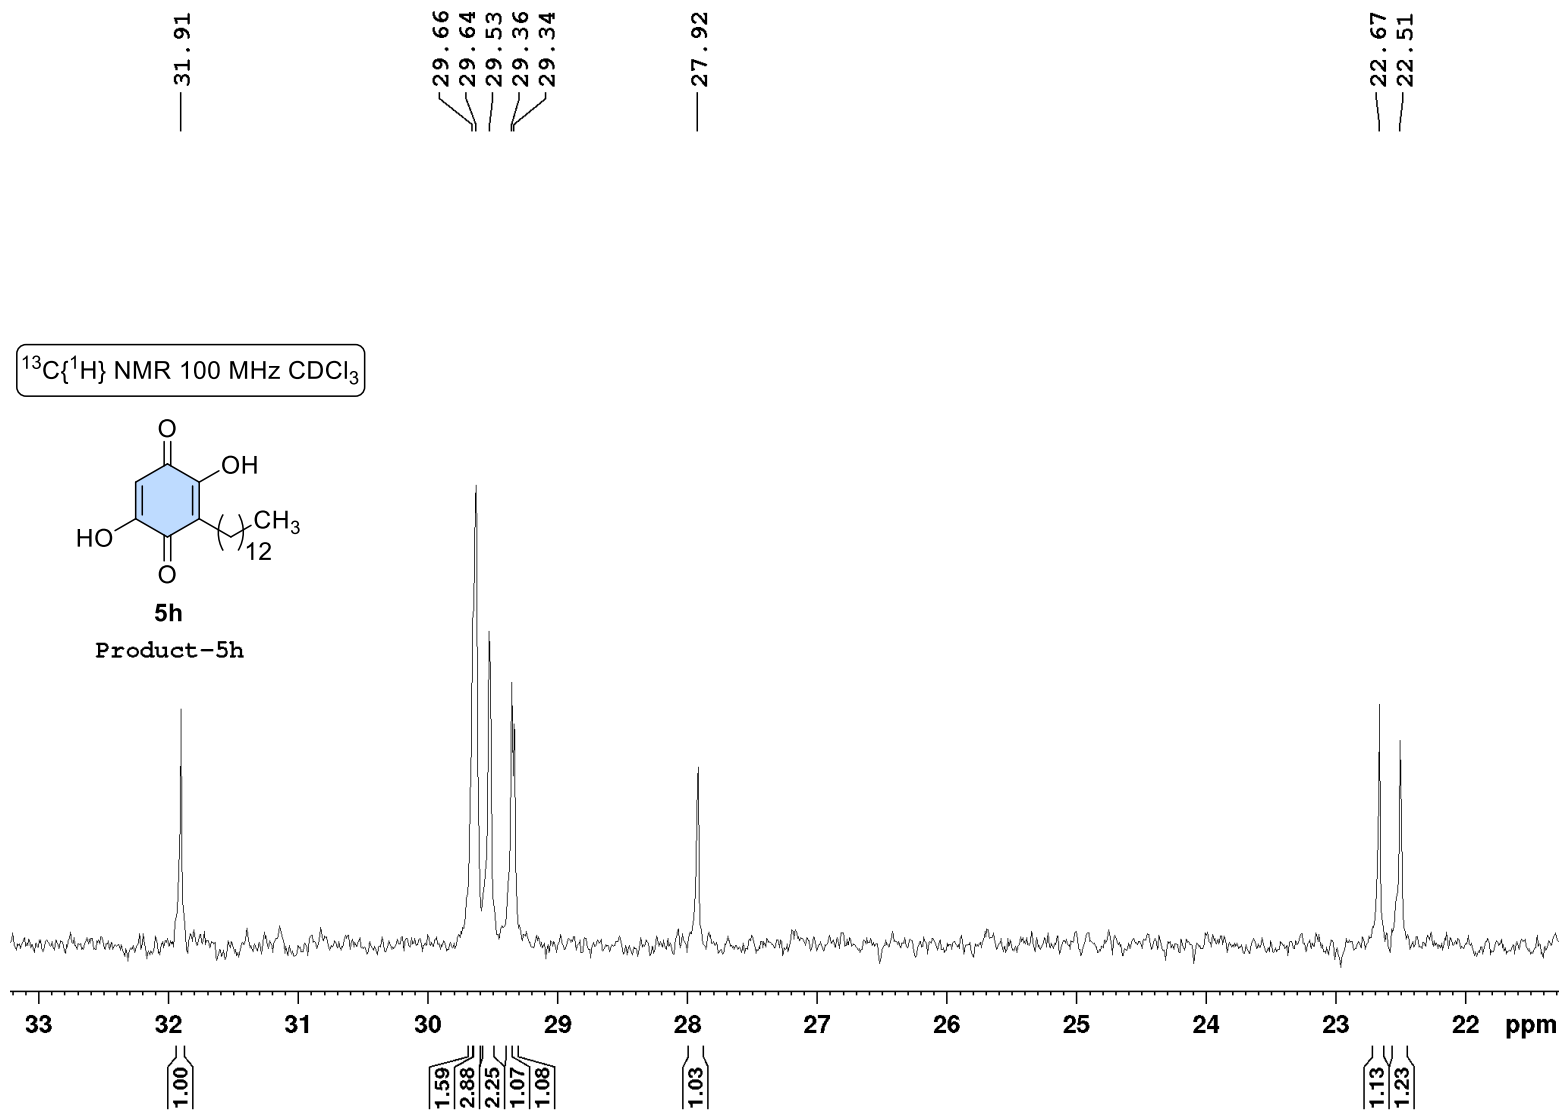



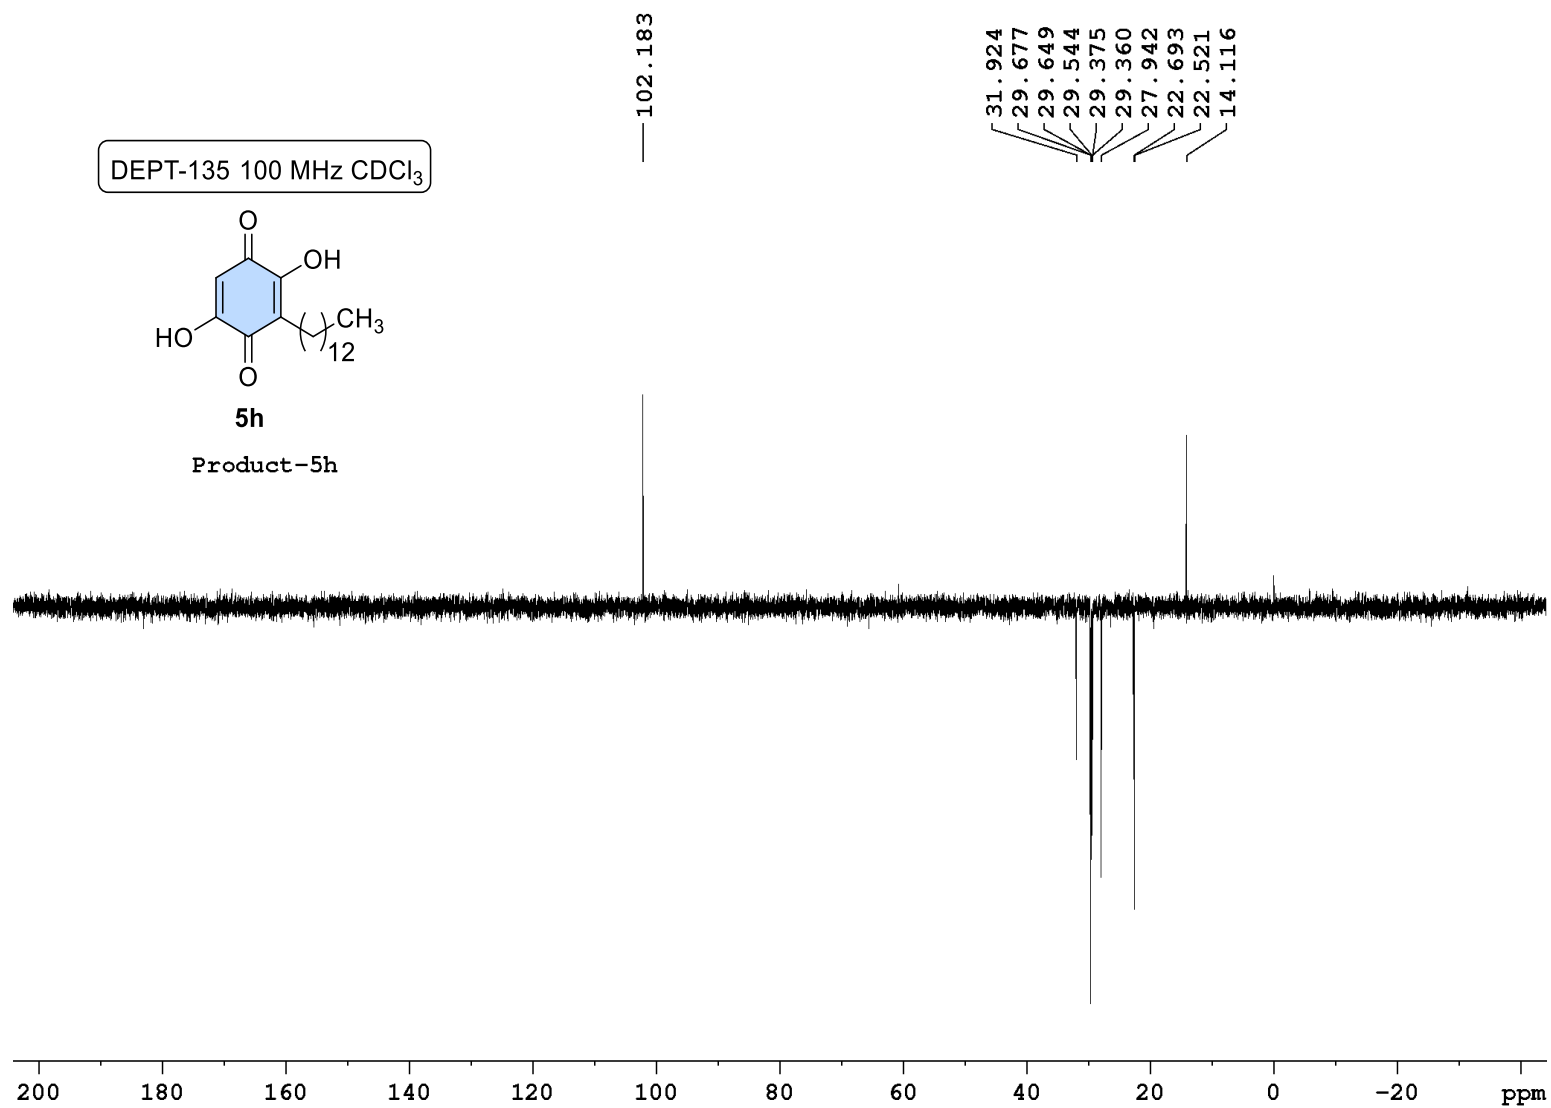

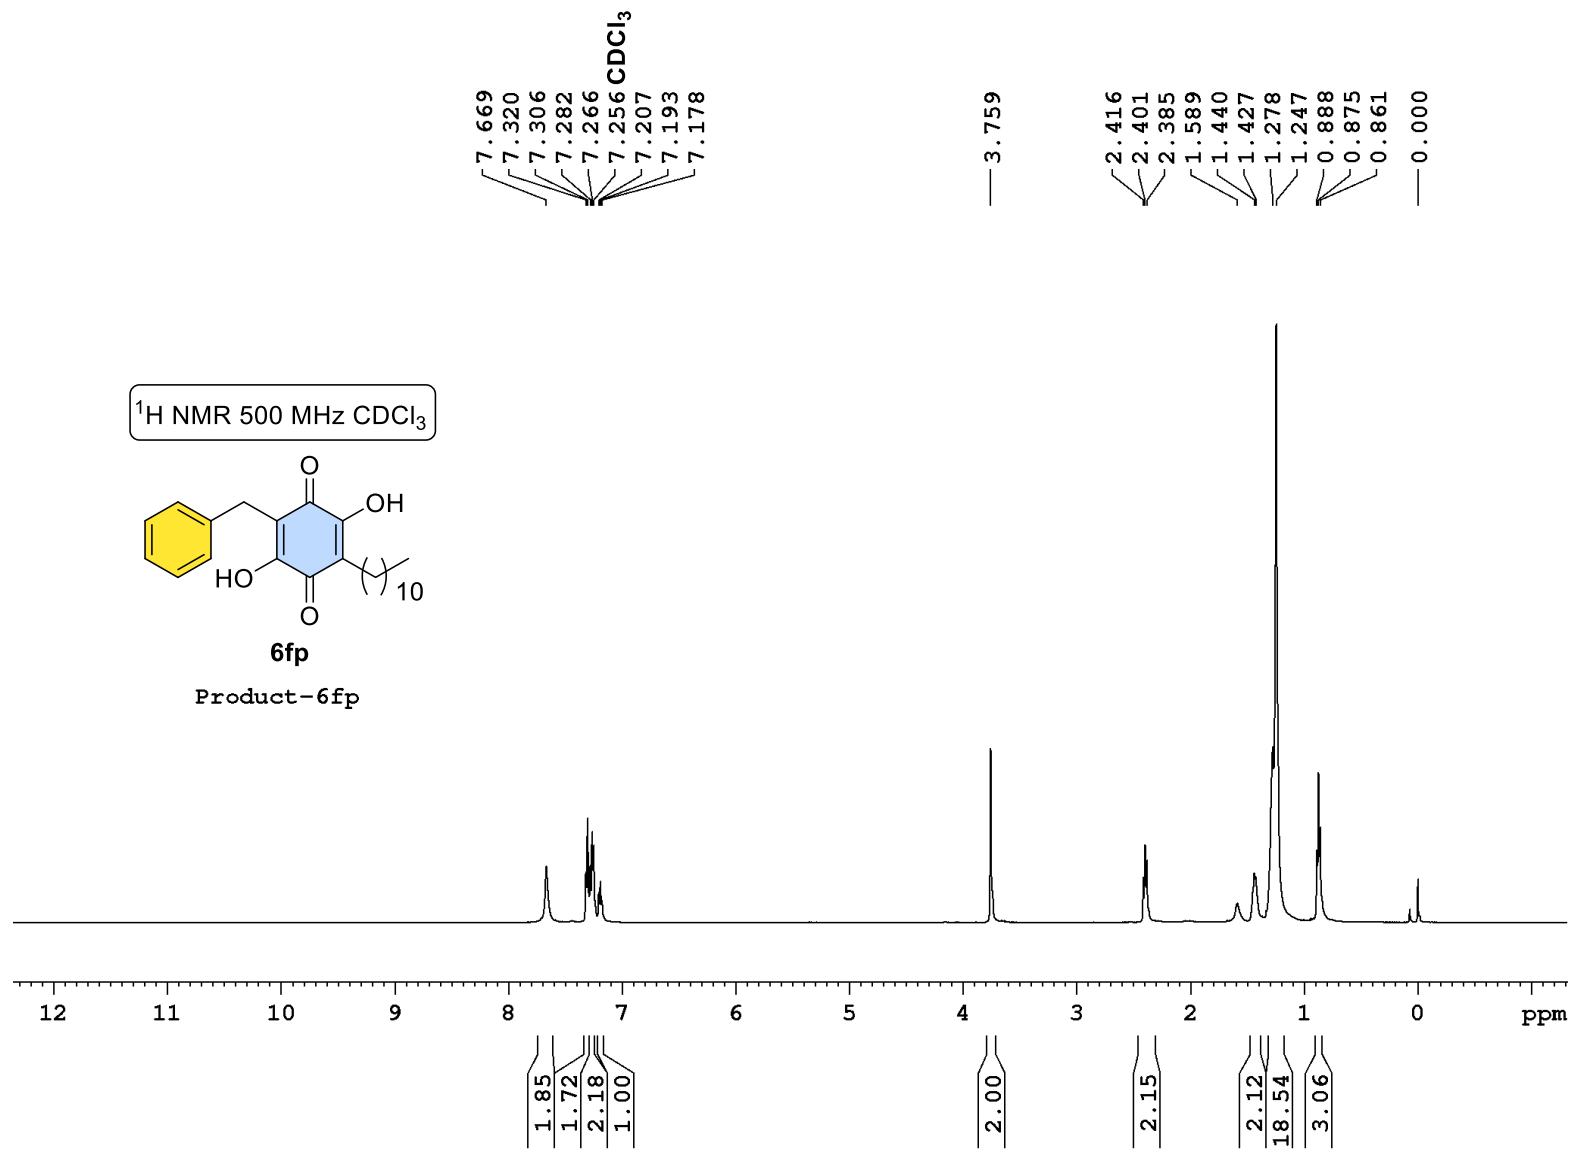

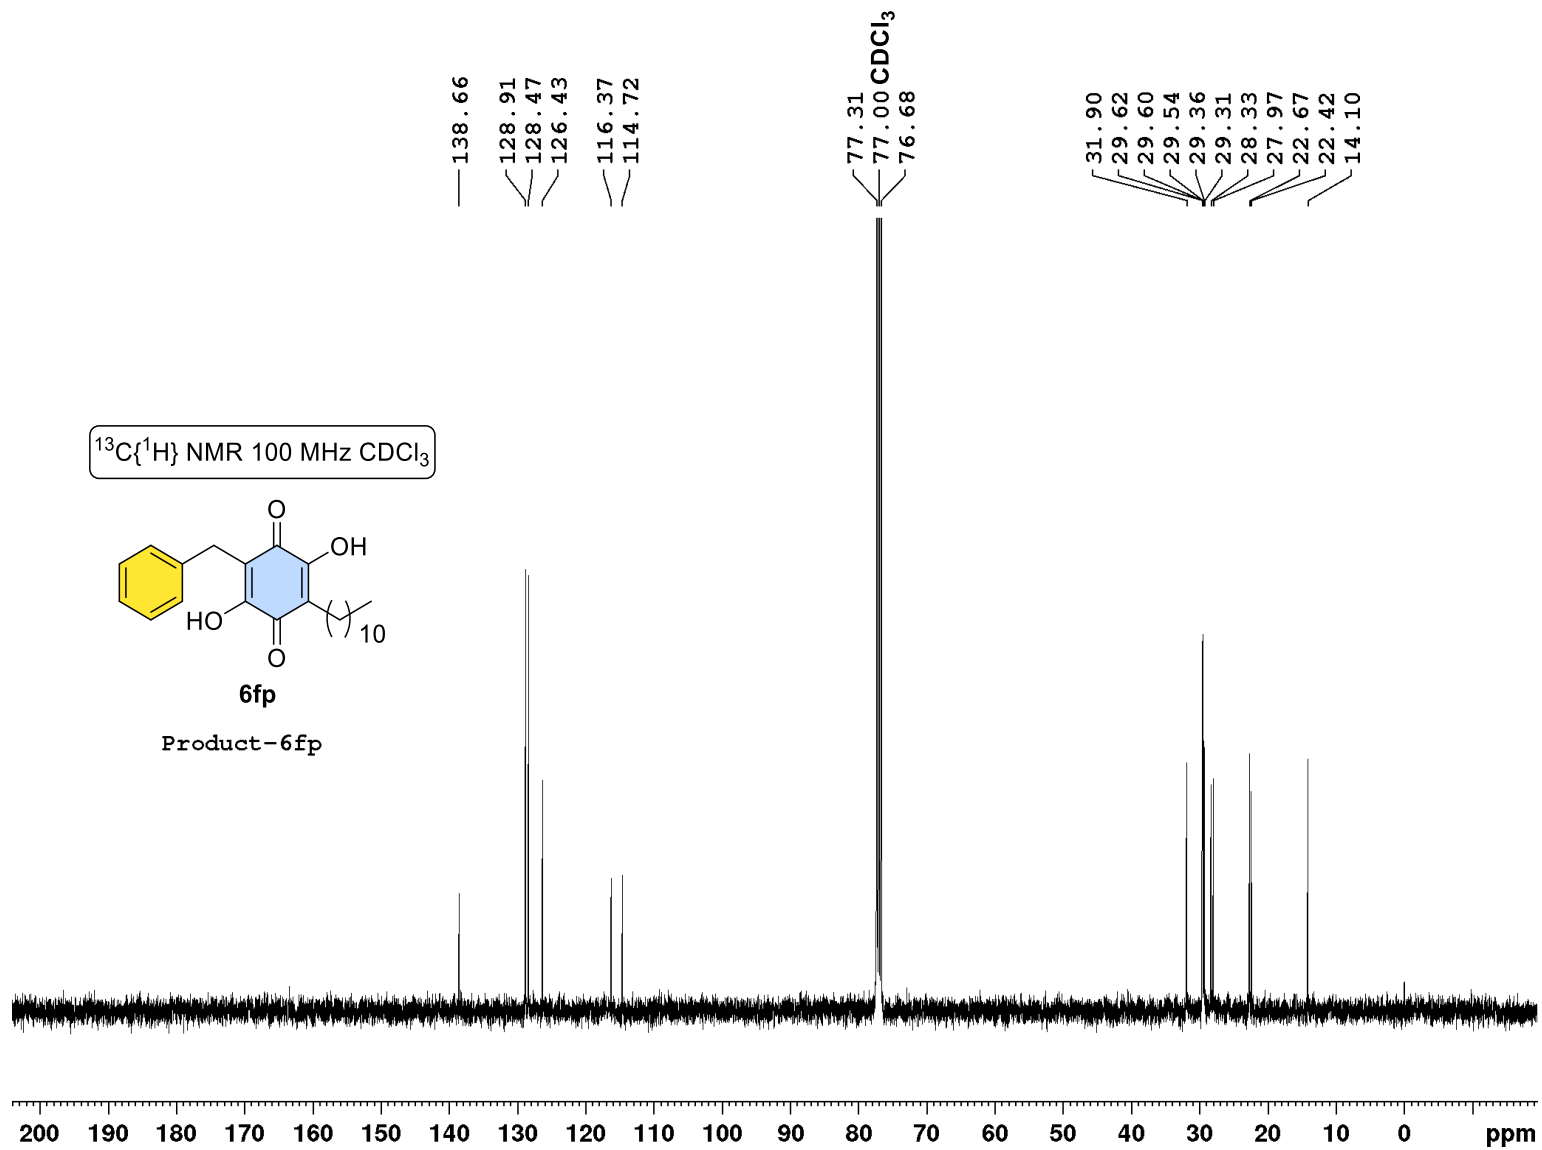

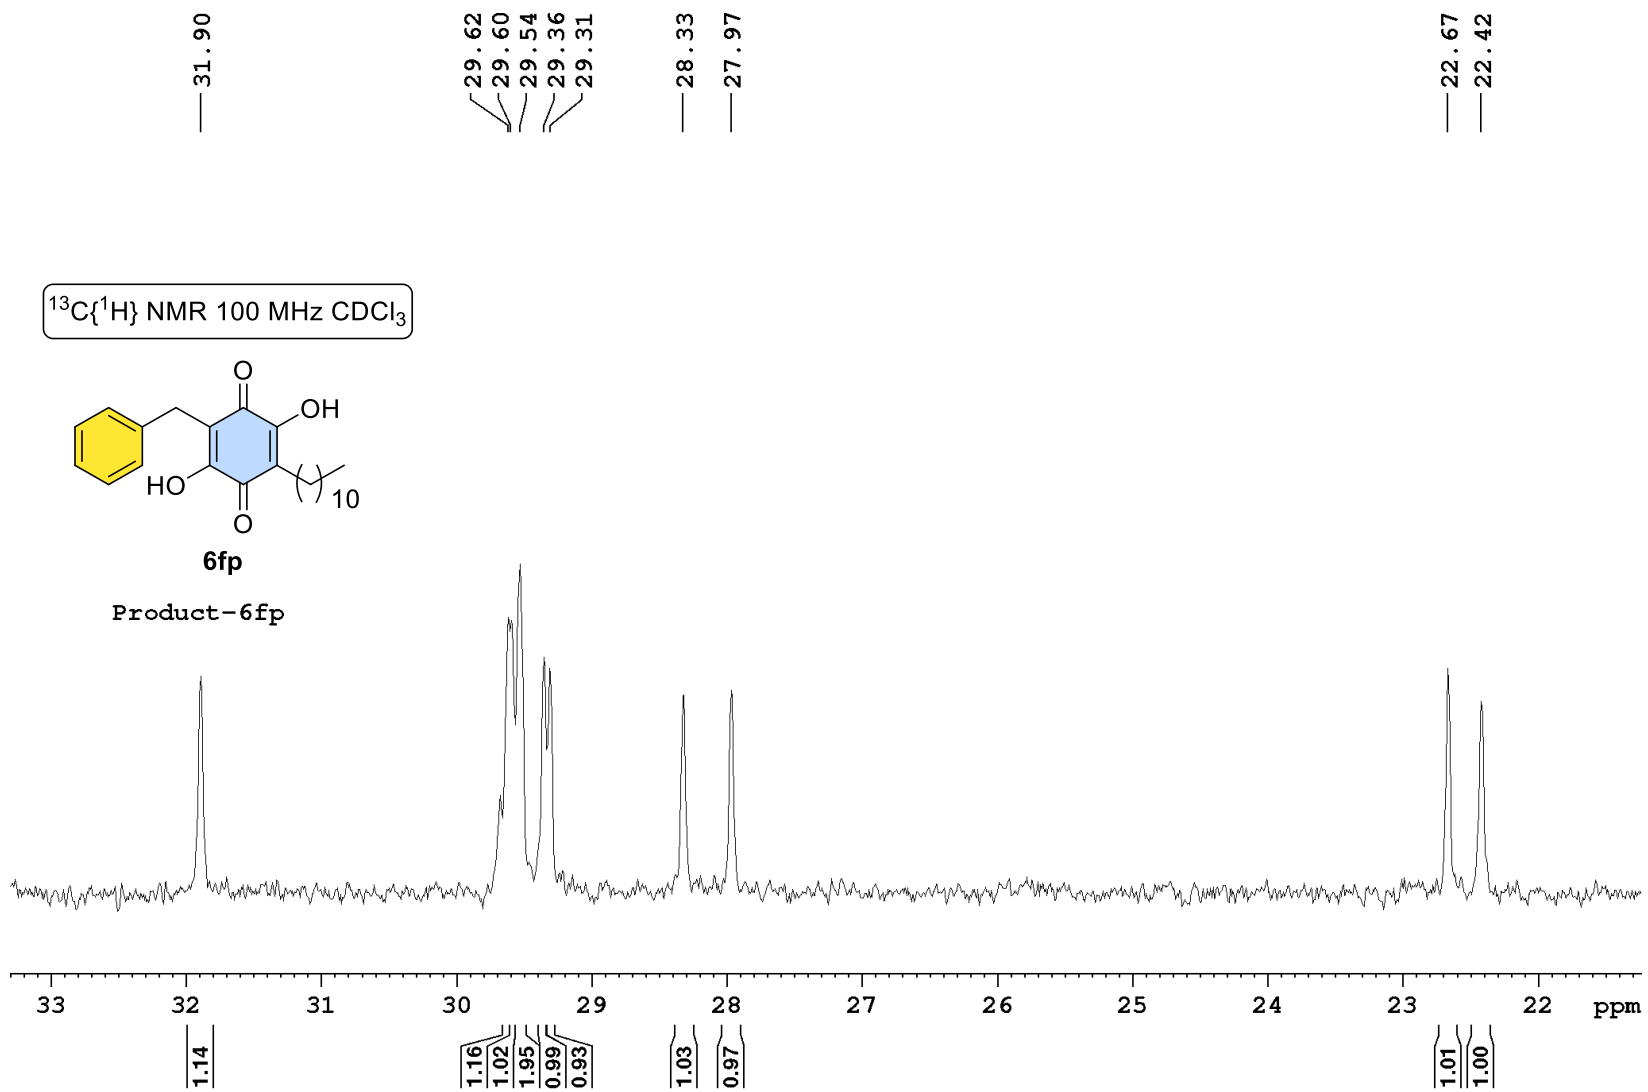

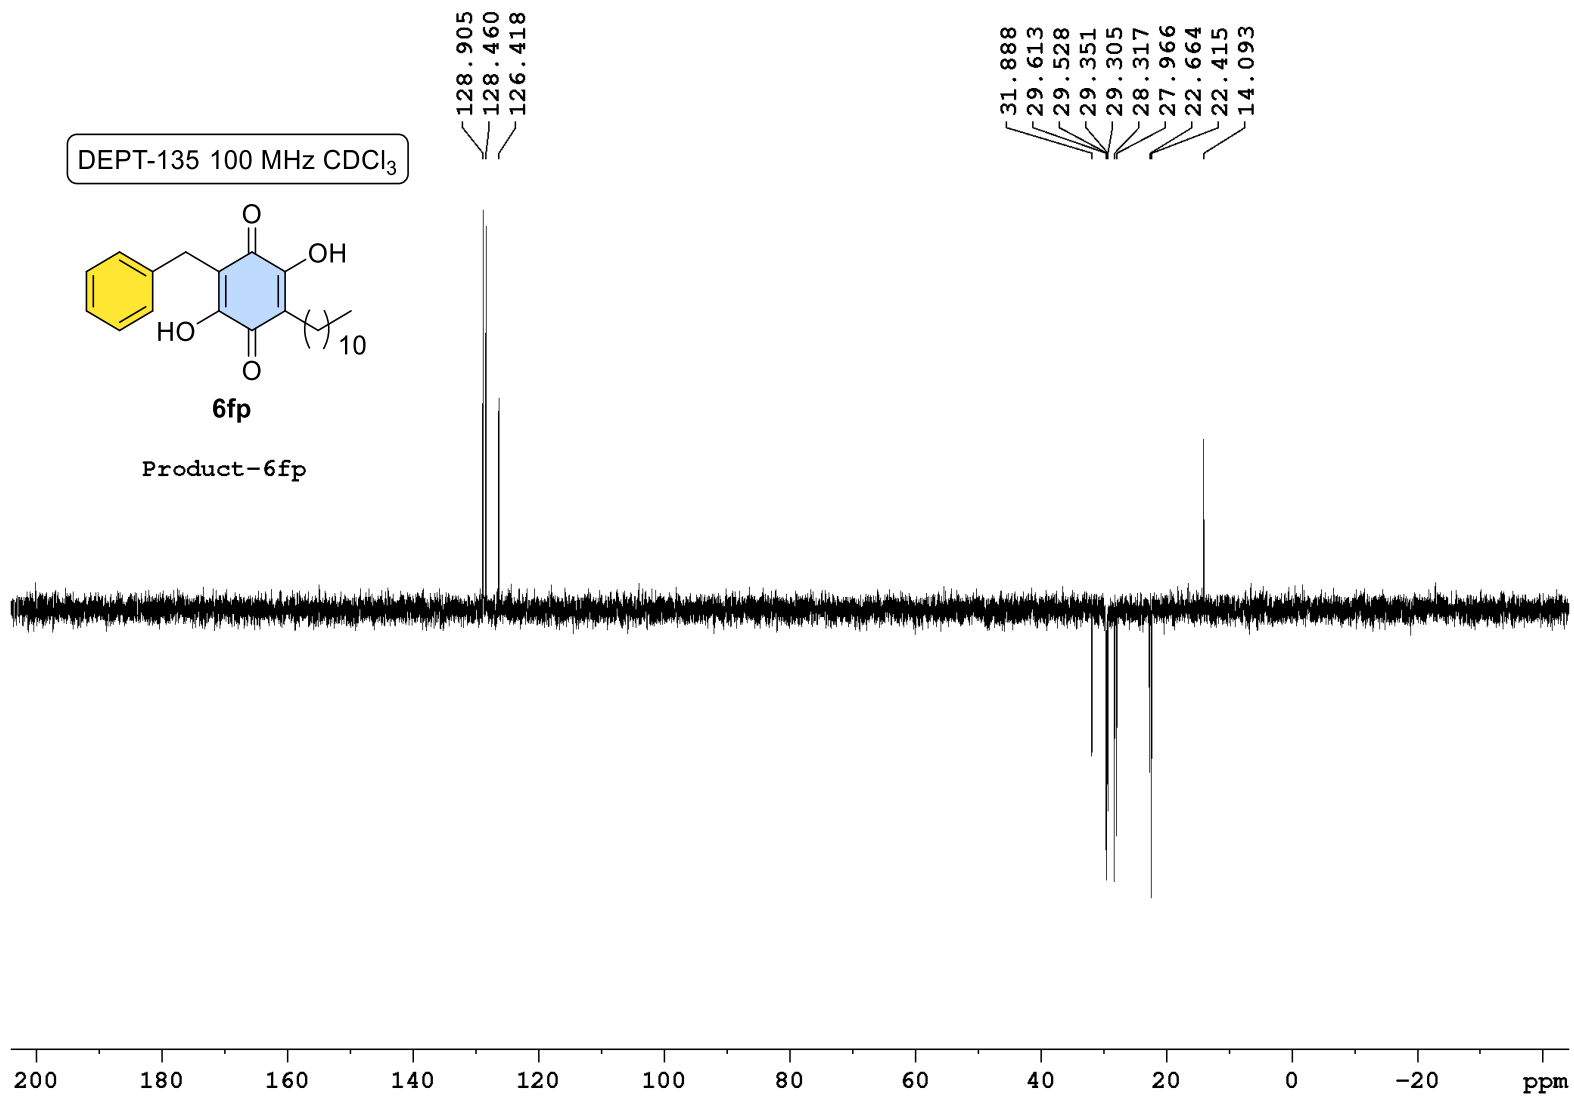

<sup>1</sup>H NMR 500 MHz DMSO-d<sub>6</sub>

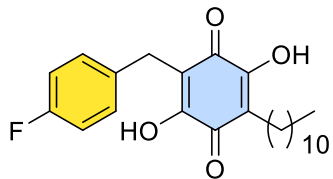

**6fbb**  
Product-6fbb

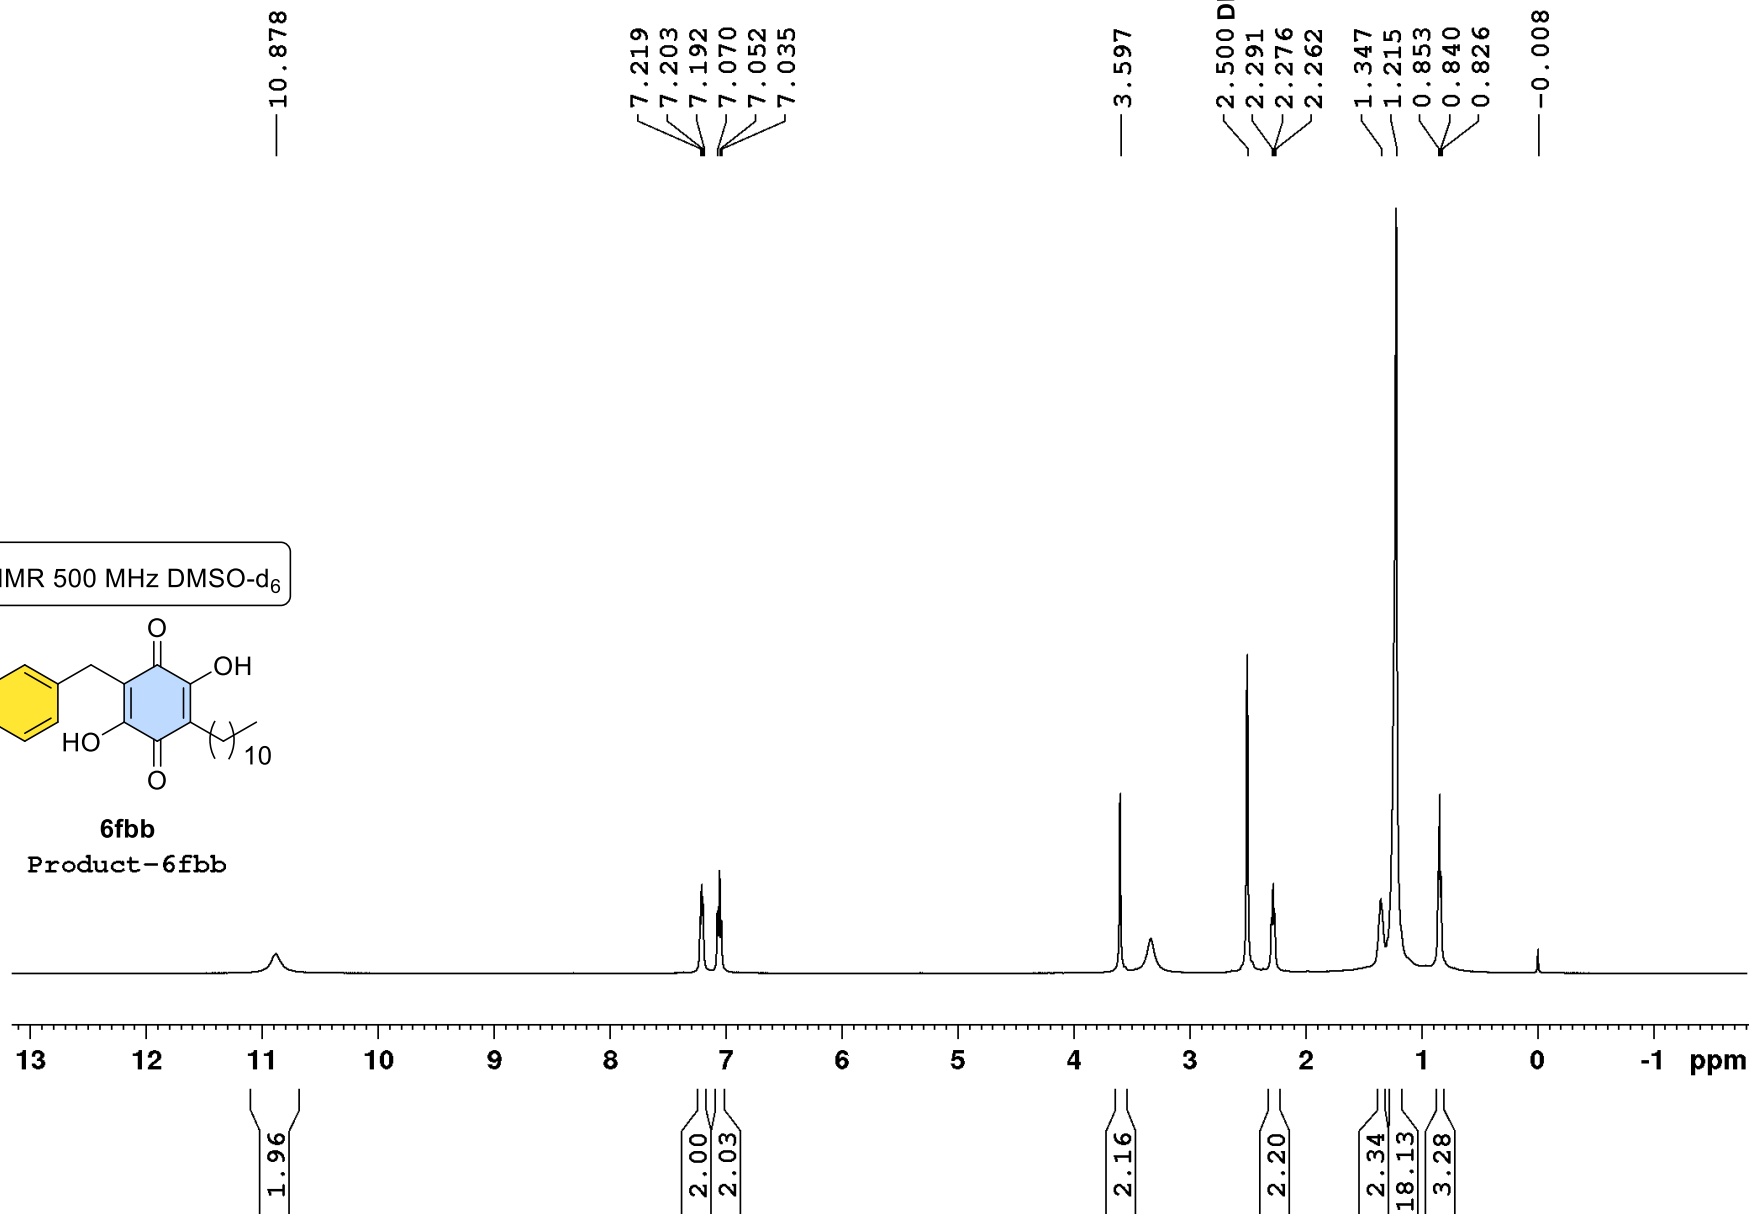

$^{13}\text{C}\{^1\text{H}\}$  NMR 125 MHz DMSO- $\text{d}_6$

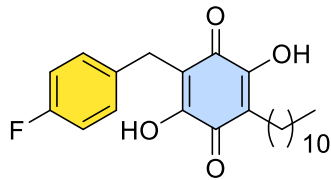

**6fbb**  
Product-6fbb

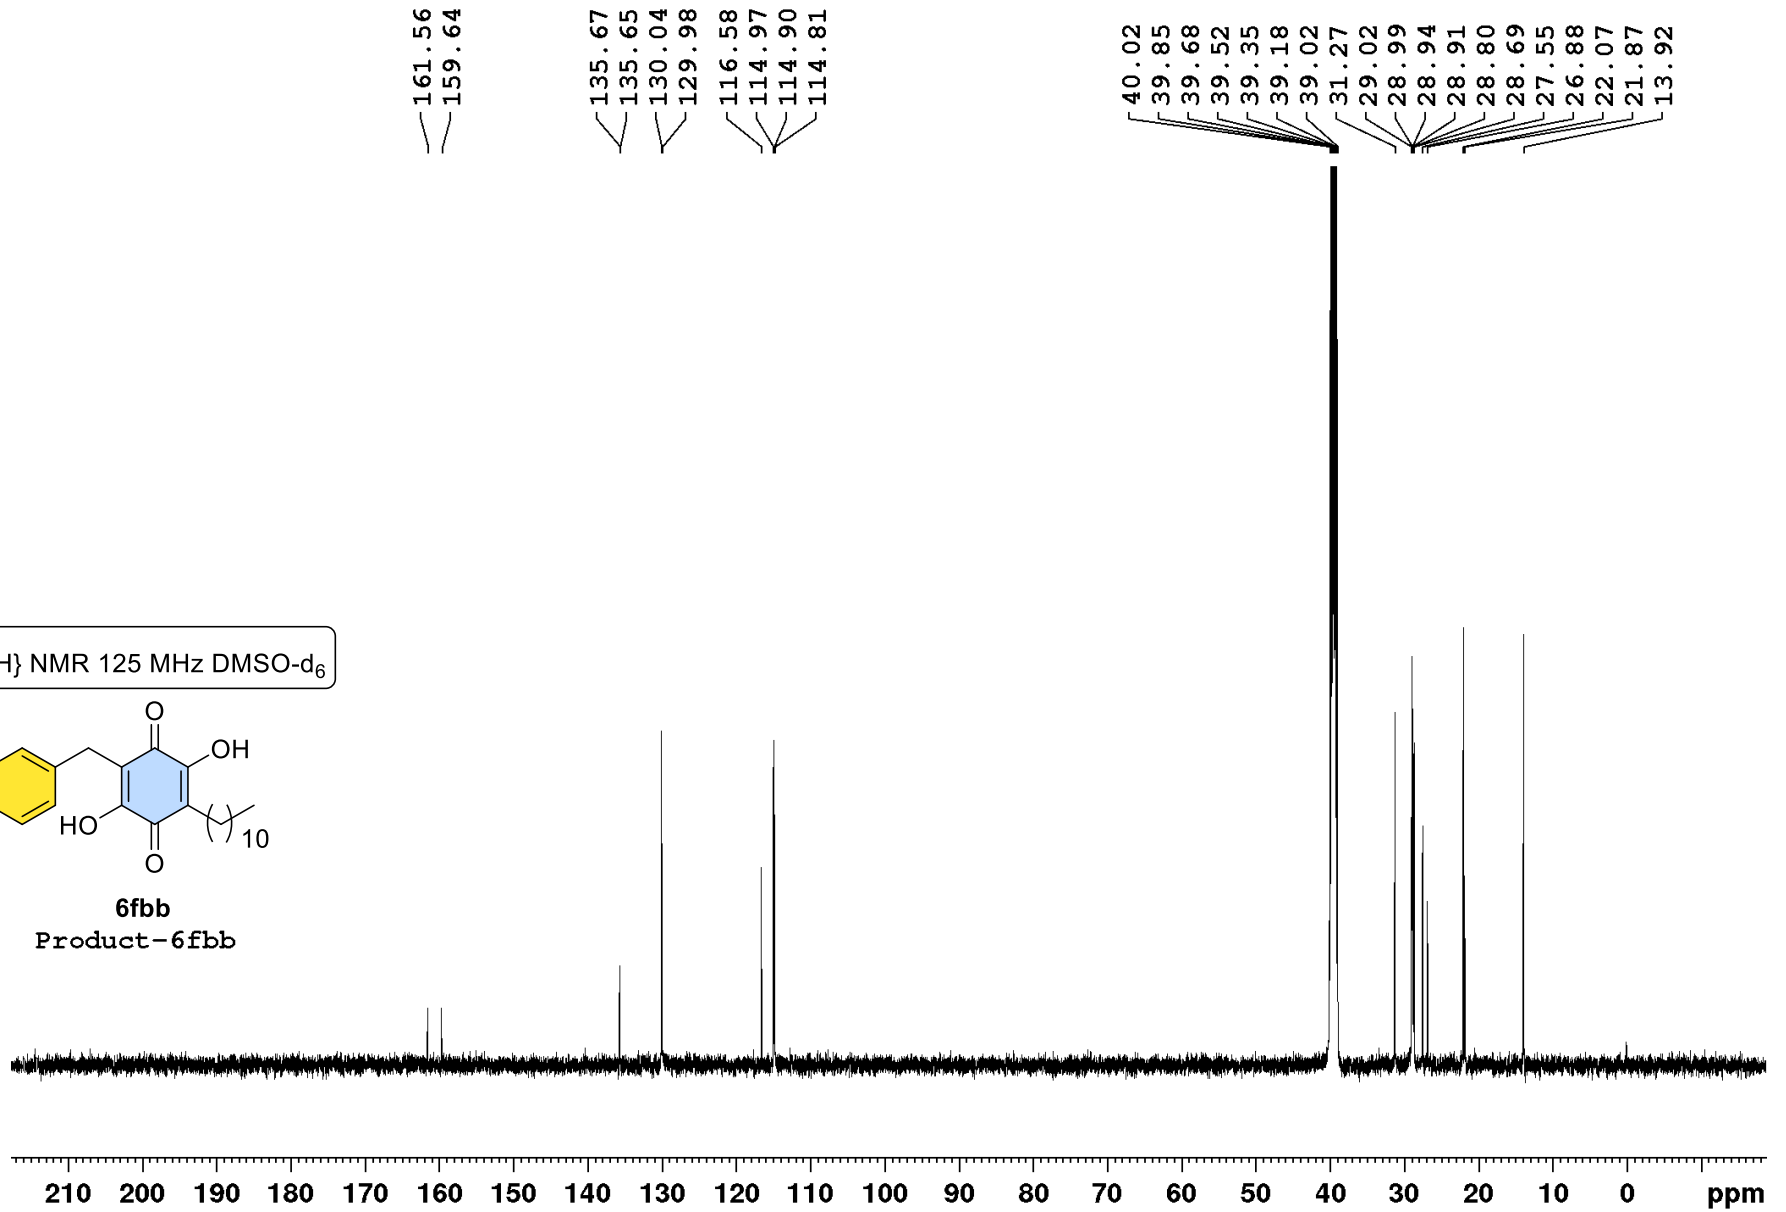

$^{13}\text{C}\{^1\text{H}\}$  NMR 125 MHz DMSO- $\text{d}_6$

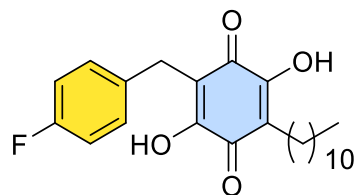

**6fbb**  
Product-6fbb

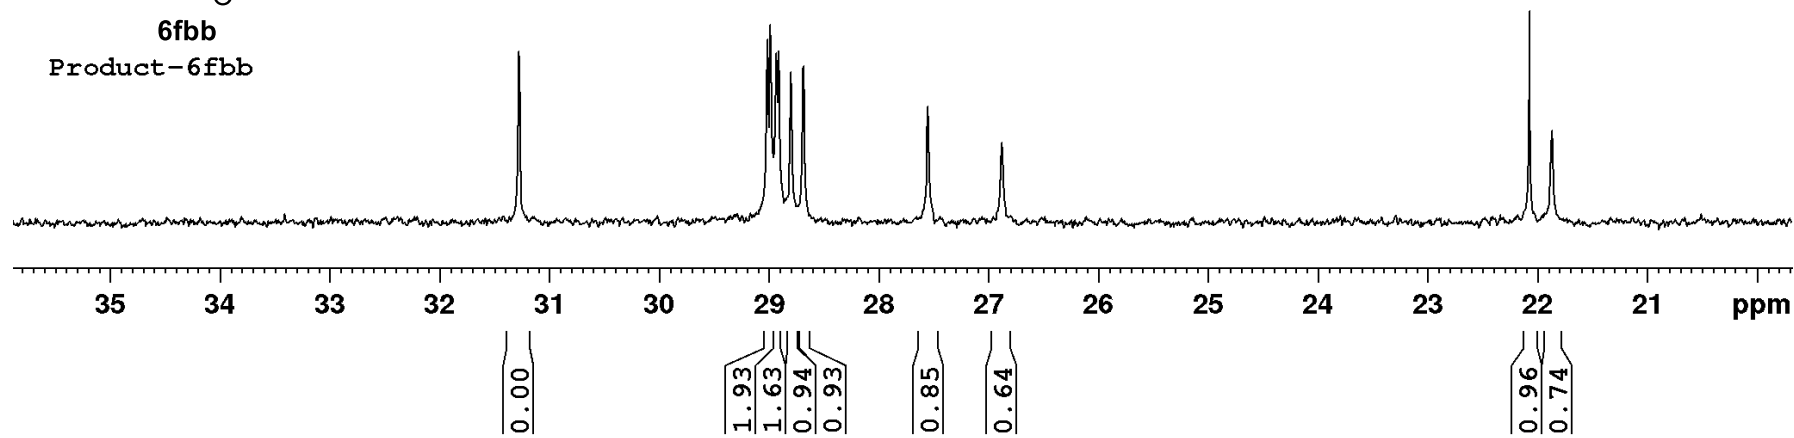



DEPT-135 125 MHz DMSO-d<sub>6</sub>

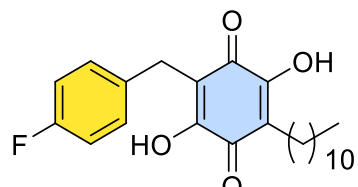

6fbb

Product-6fbb

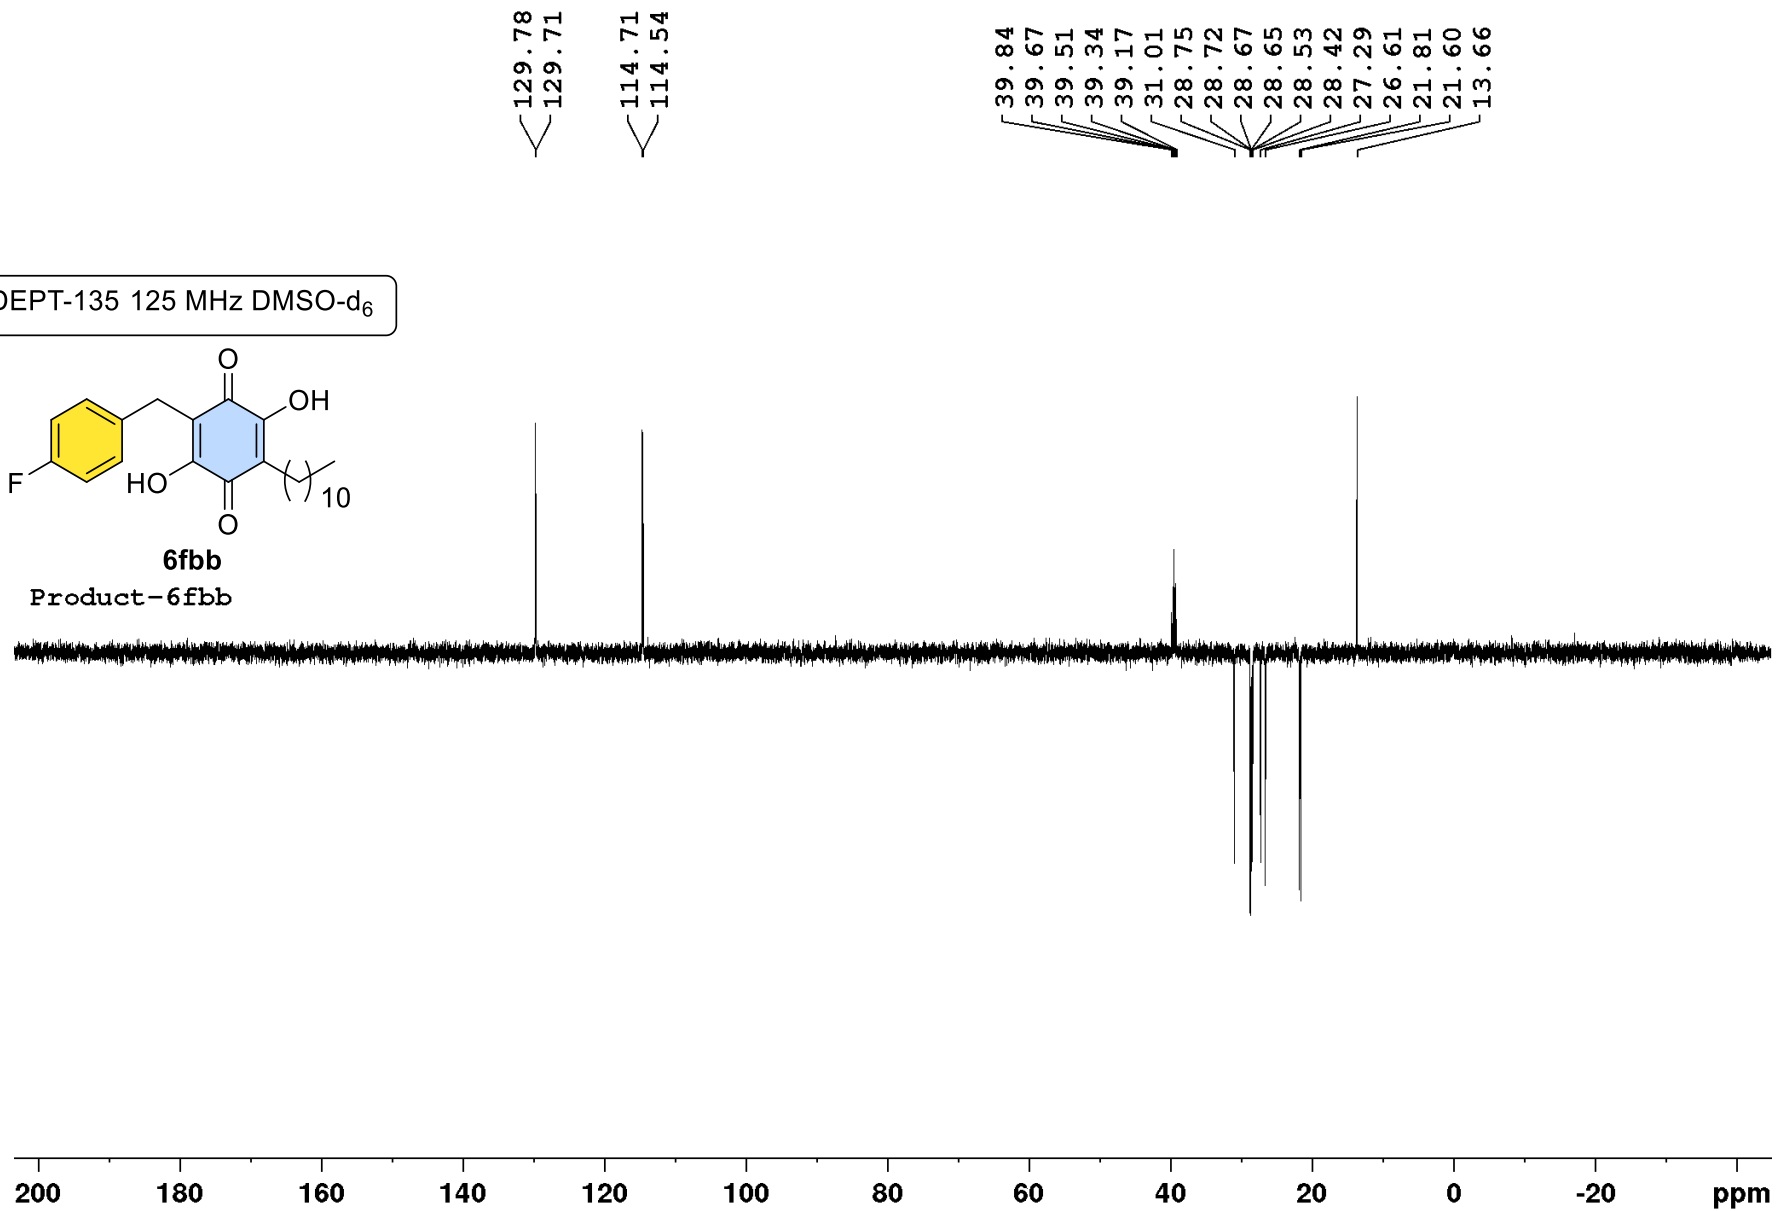

<sup>19</sup>F NMR 400 MHz DMSO-d<sub>6</sub>

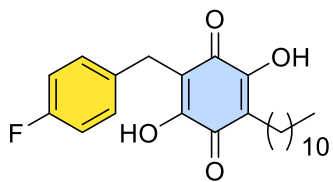

**6fbb**

Product-6fbb

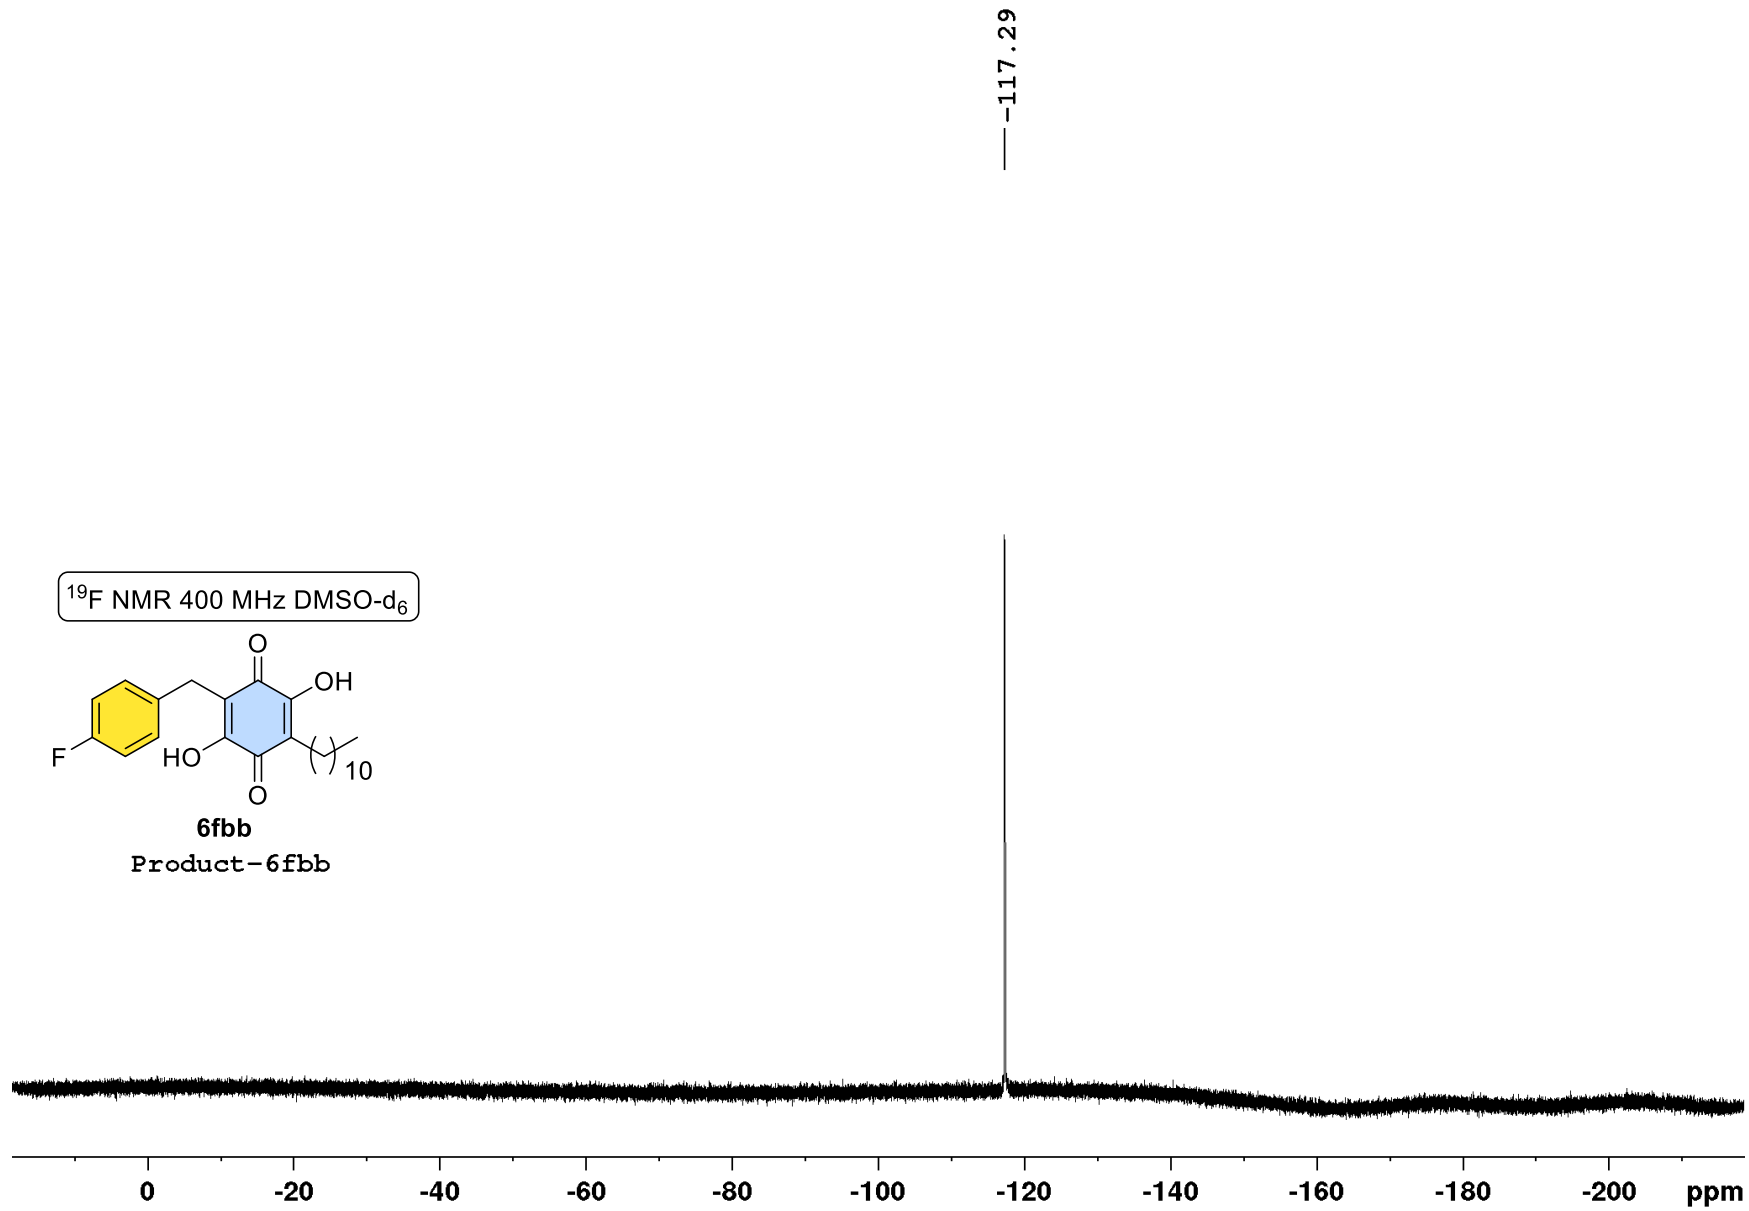

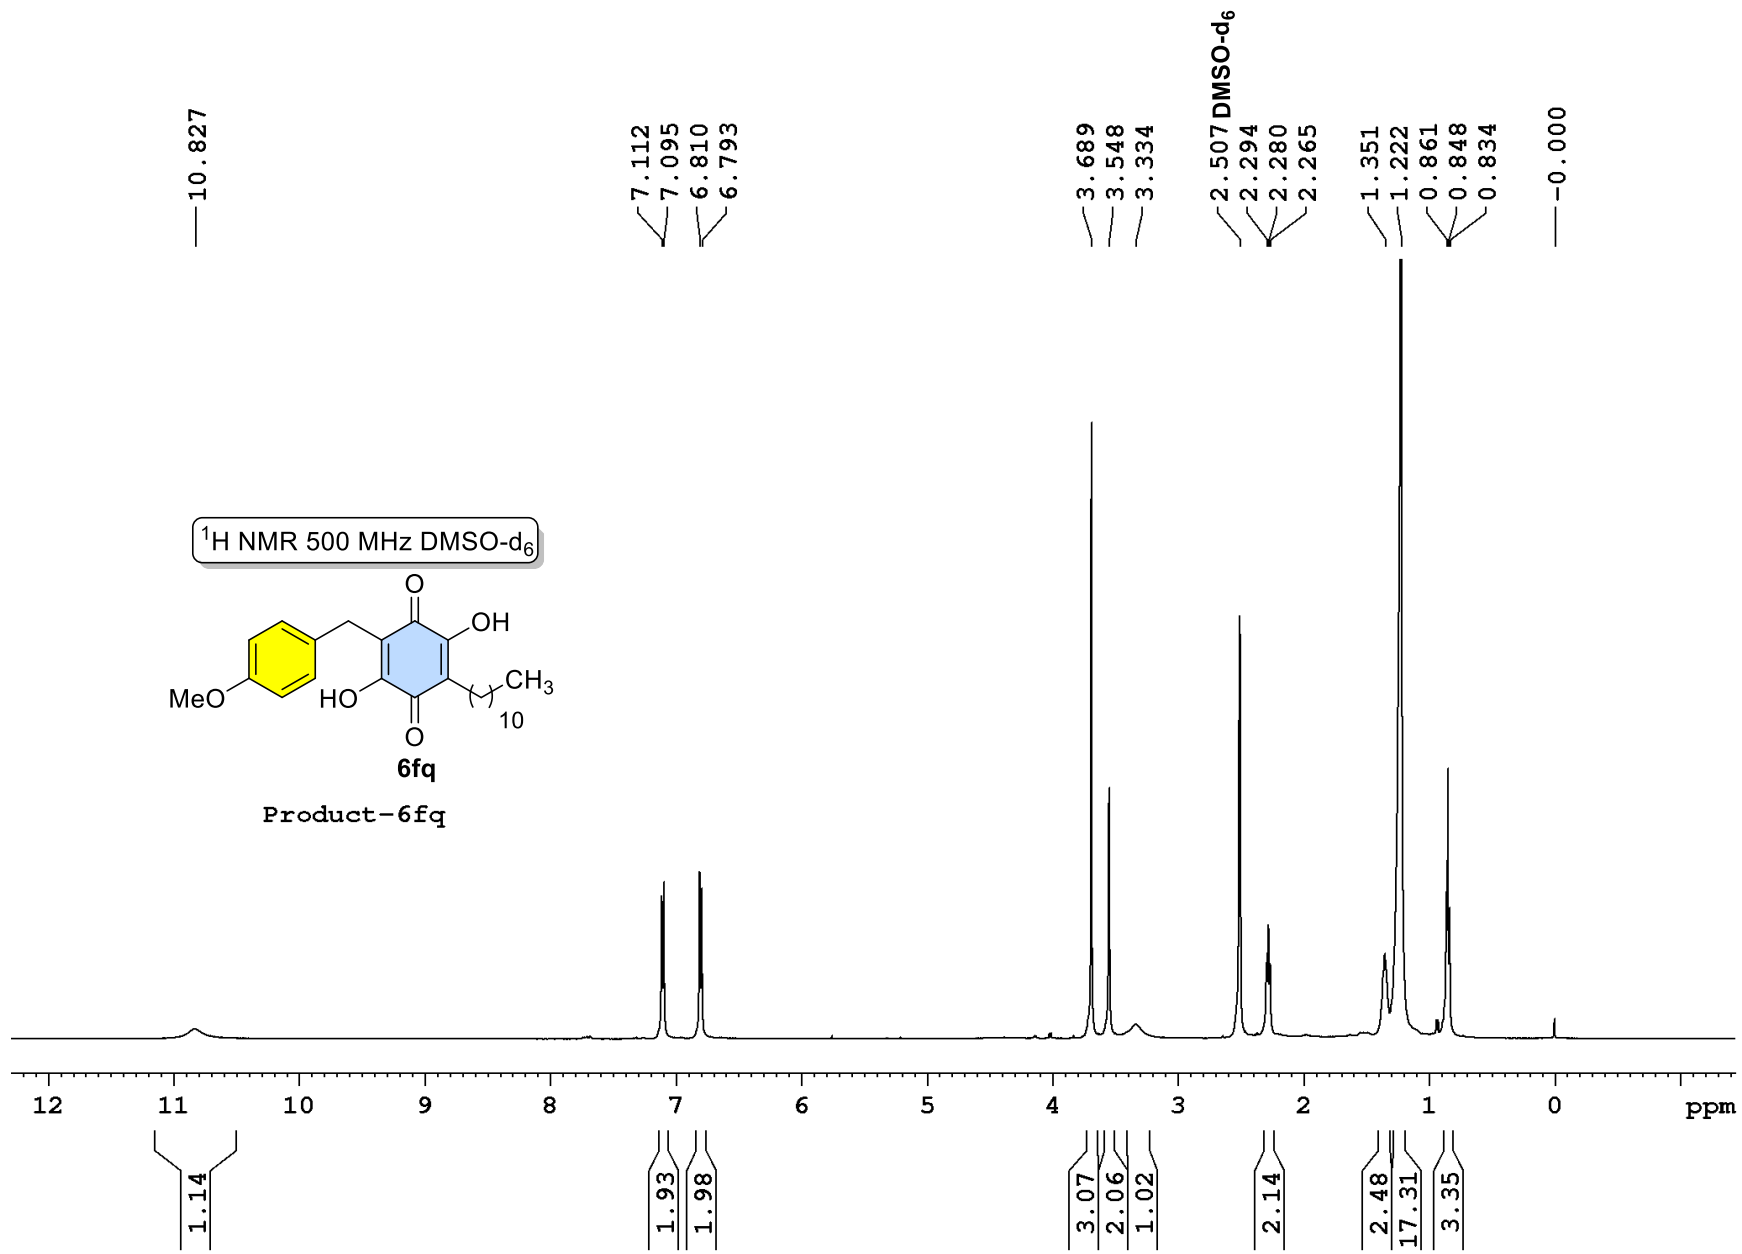

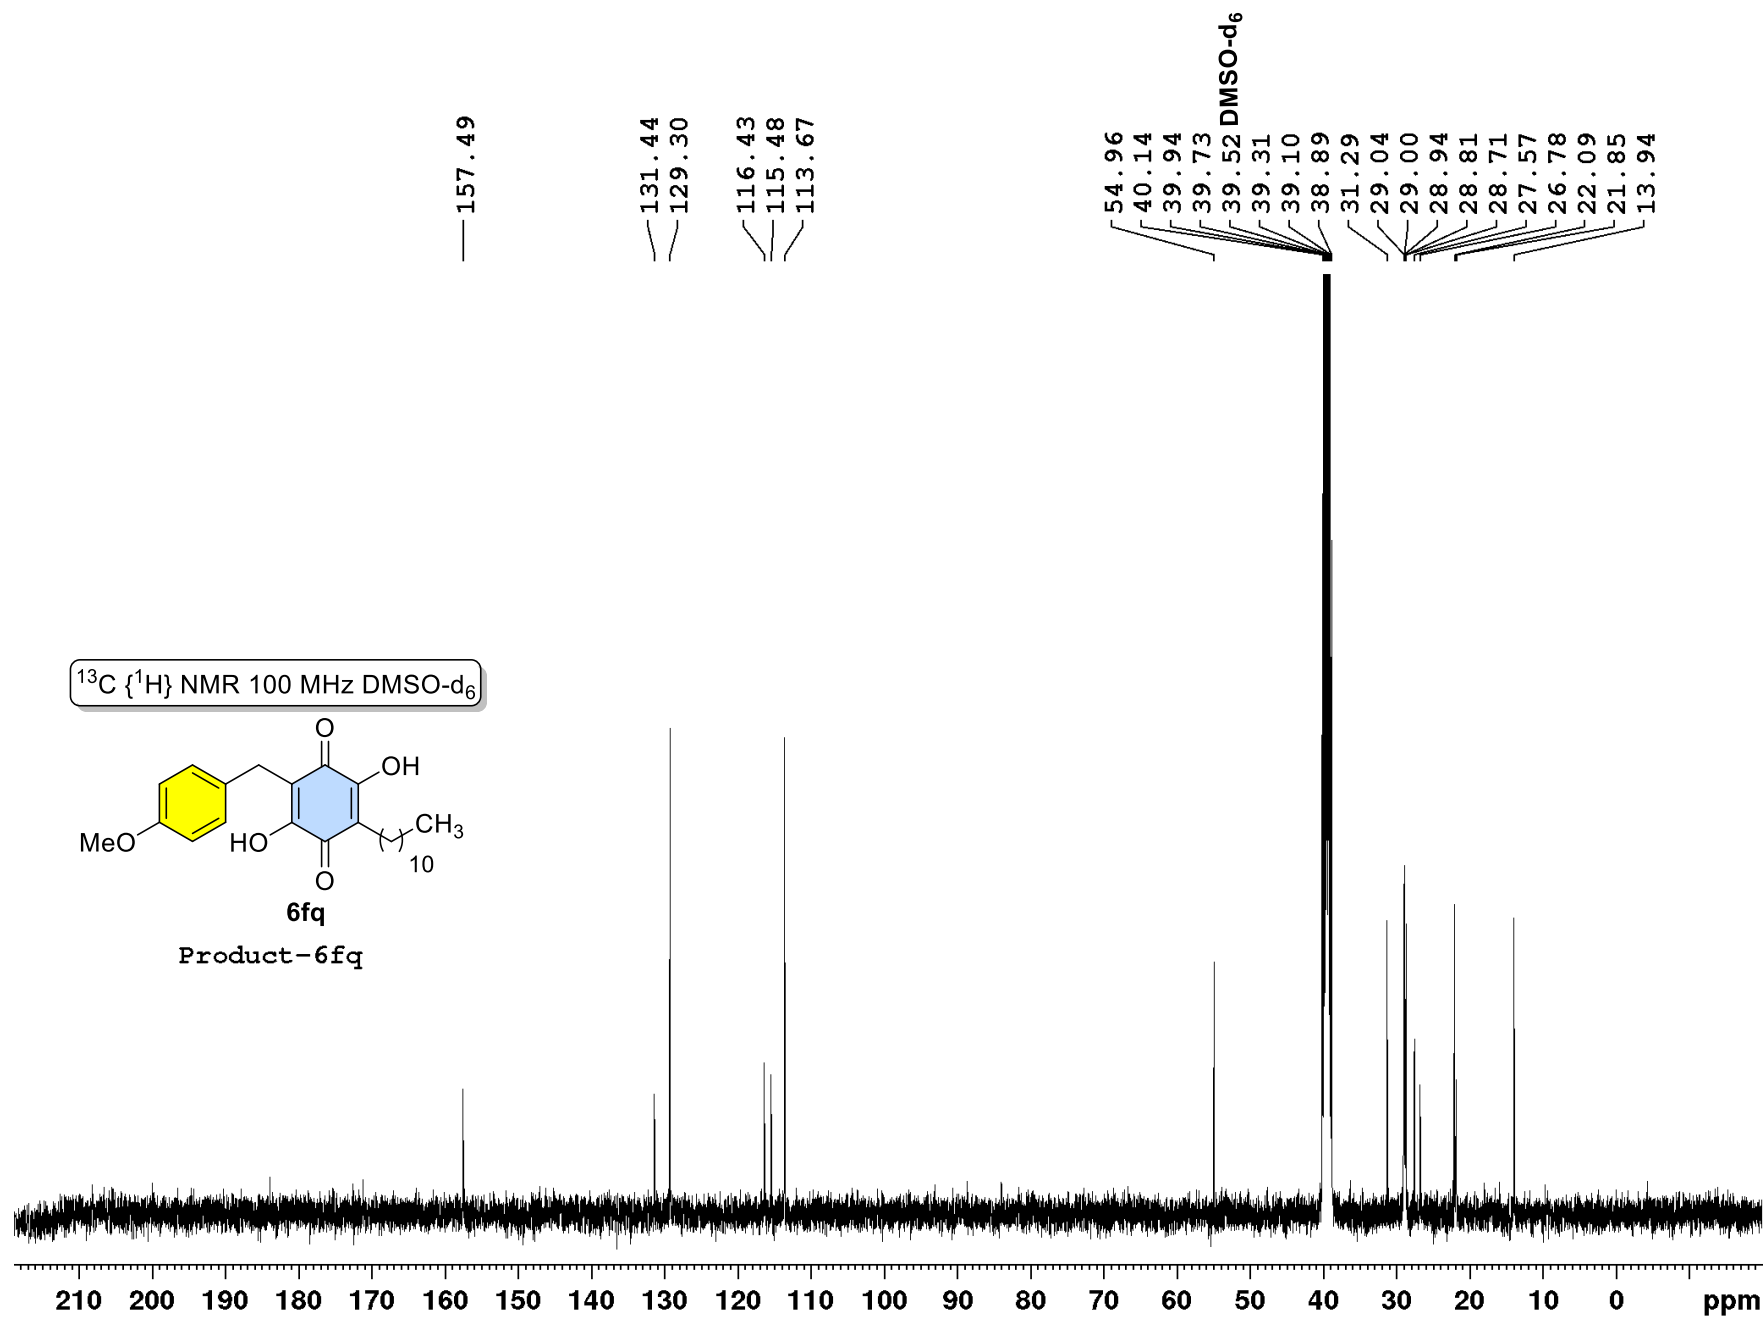

$^{13}\text{C}$   $\{^1\text{H}\}$  NMR 100 MHz DMSO- $d_6$

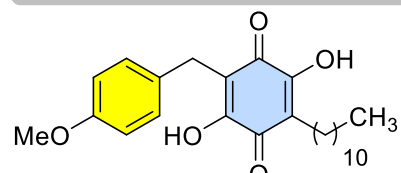

6fq

Product-6fq

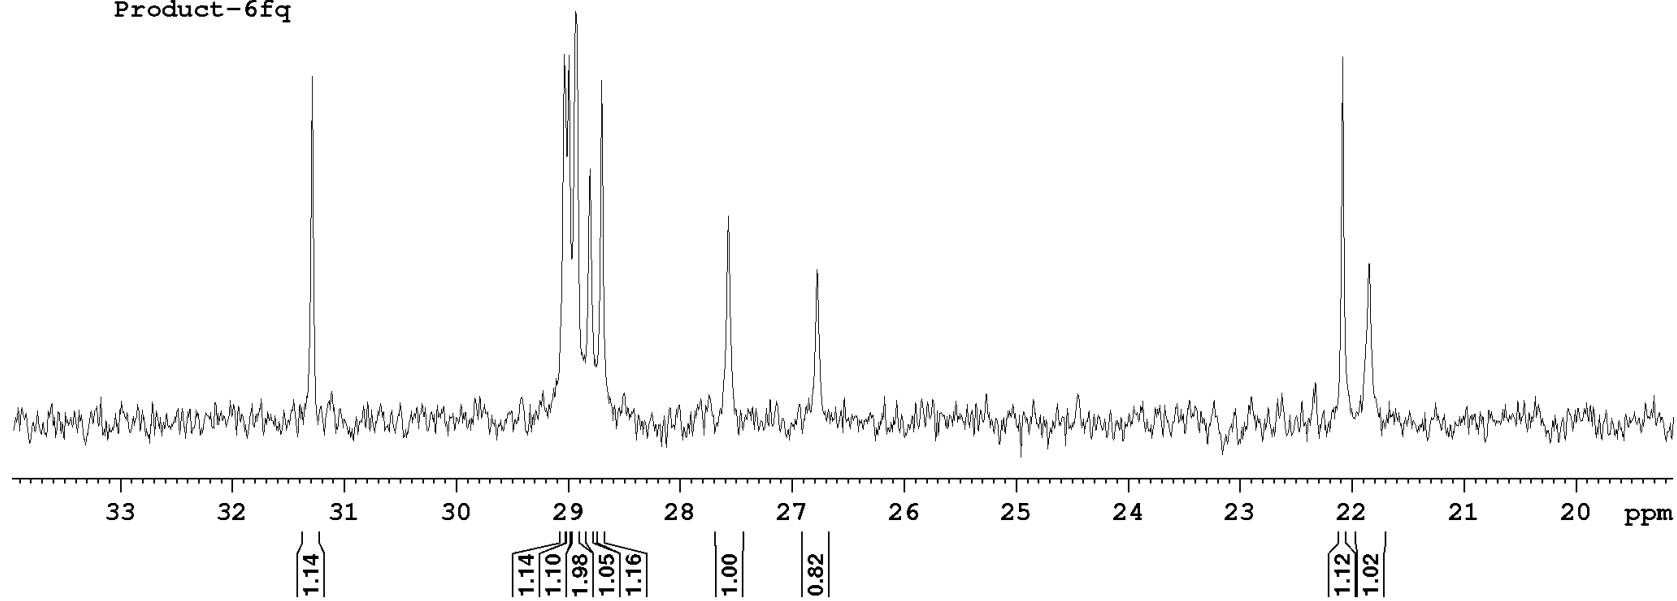

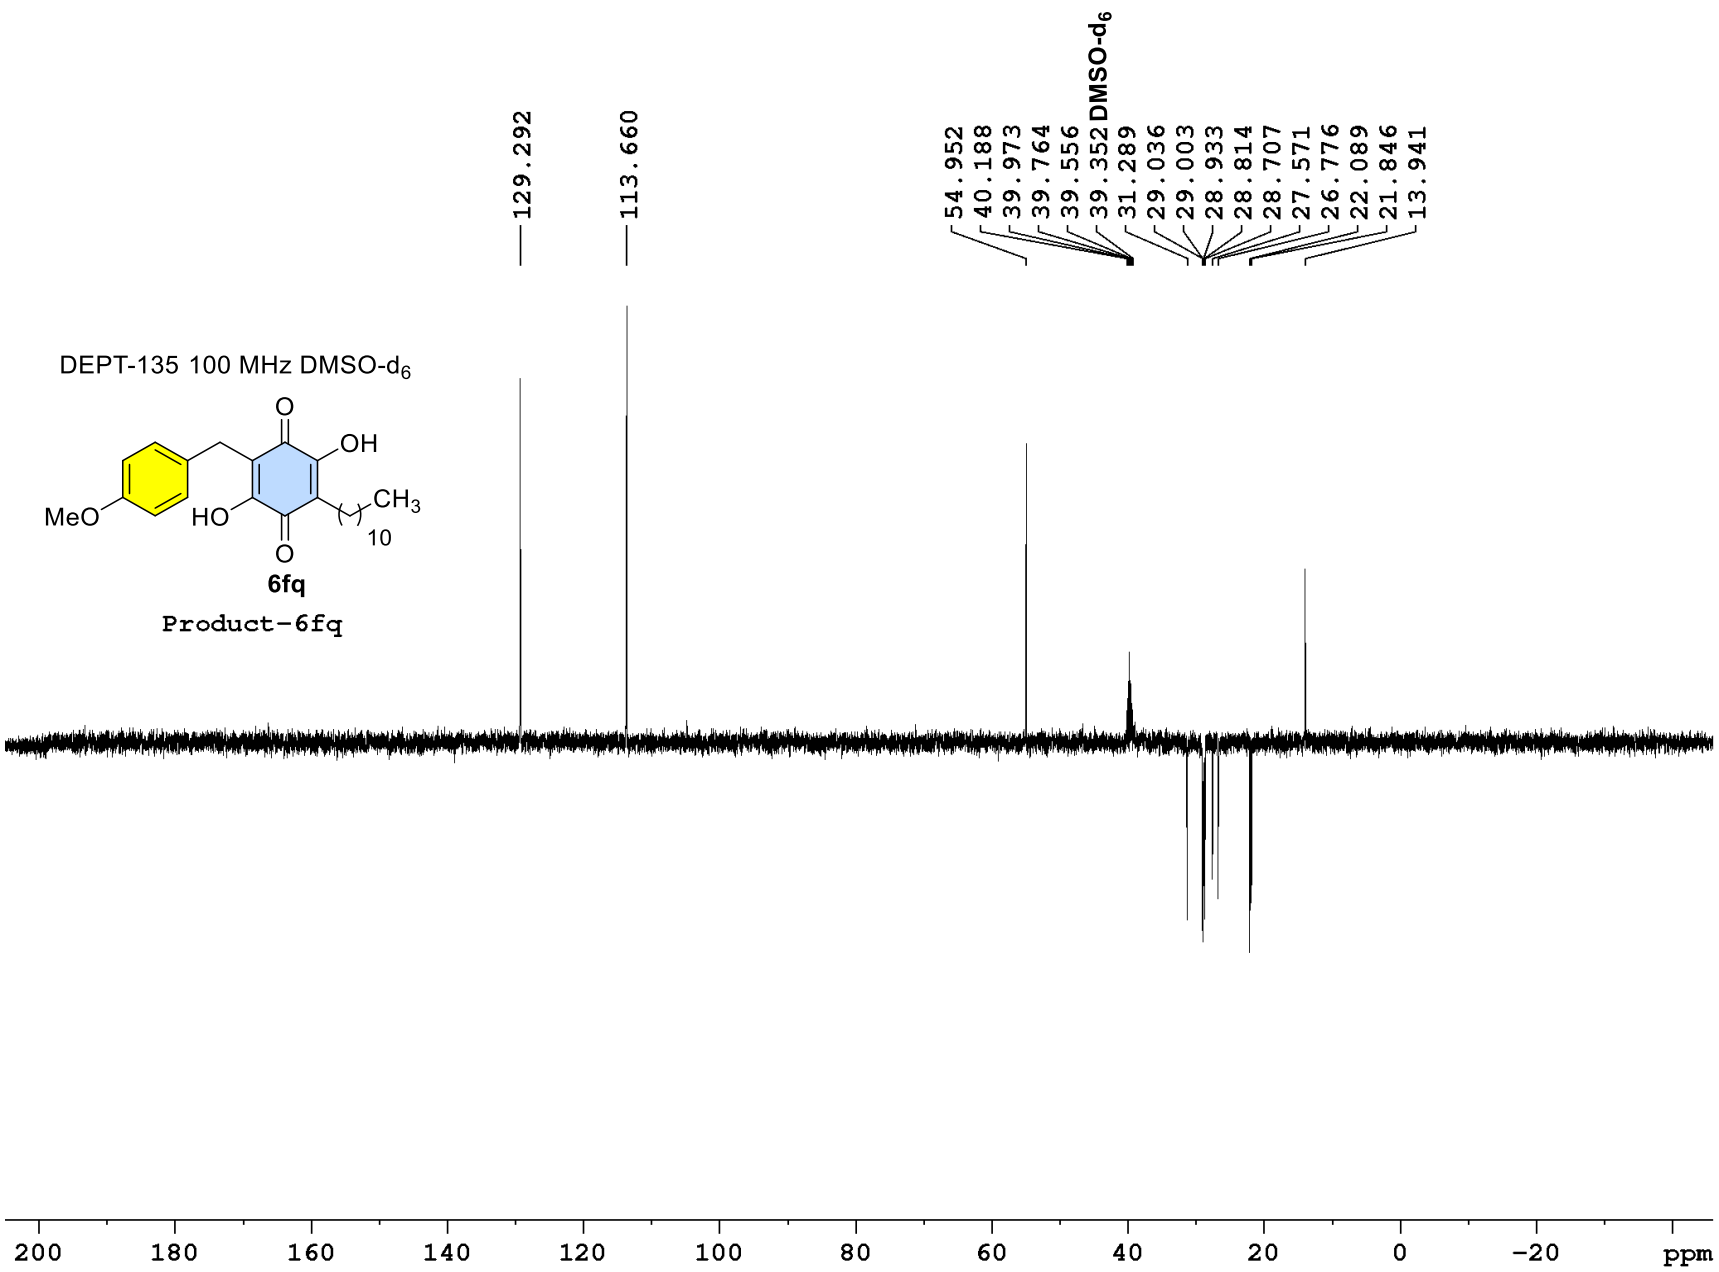

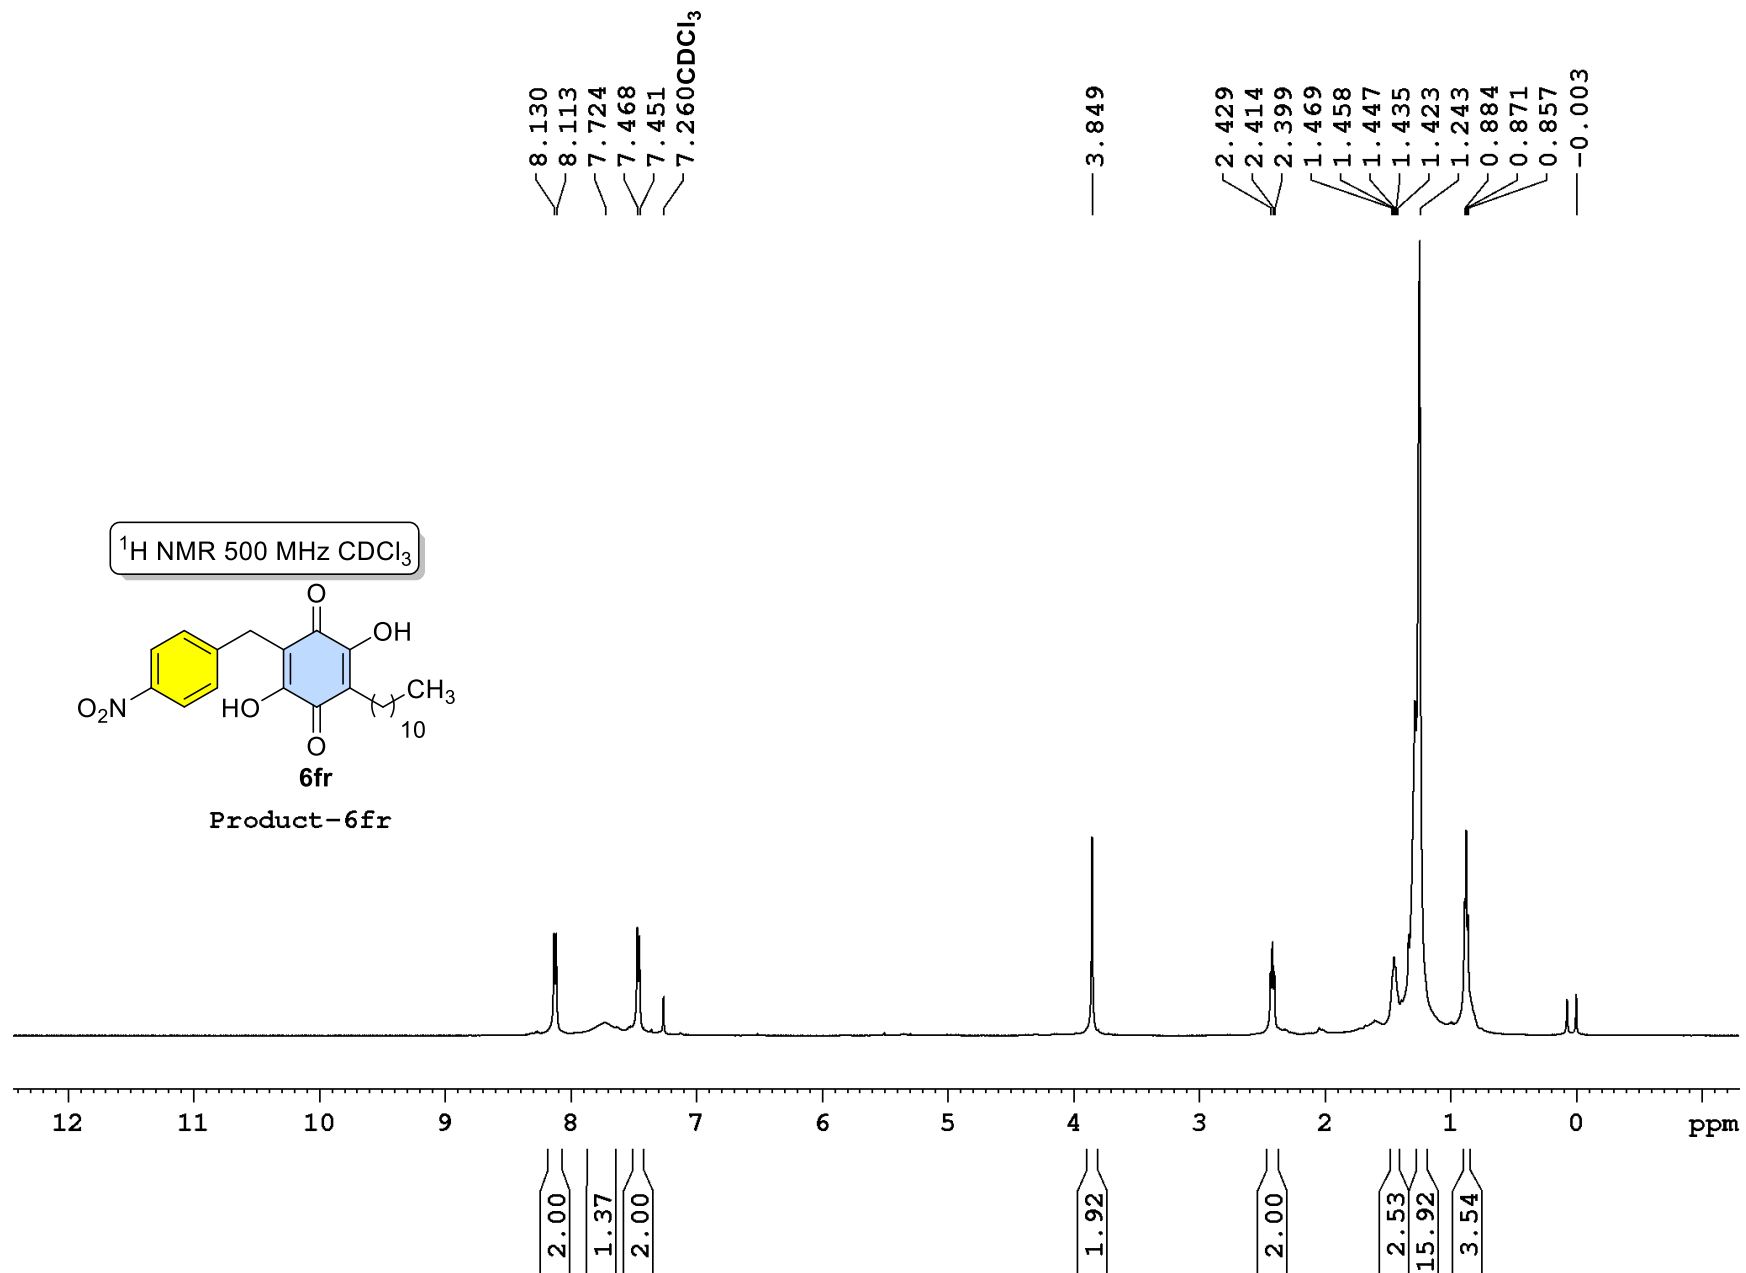

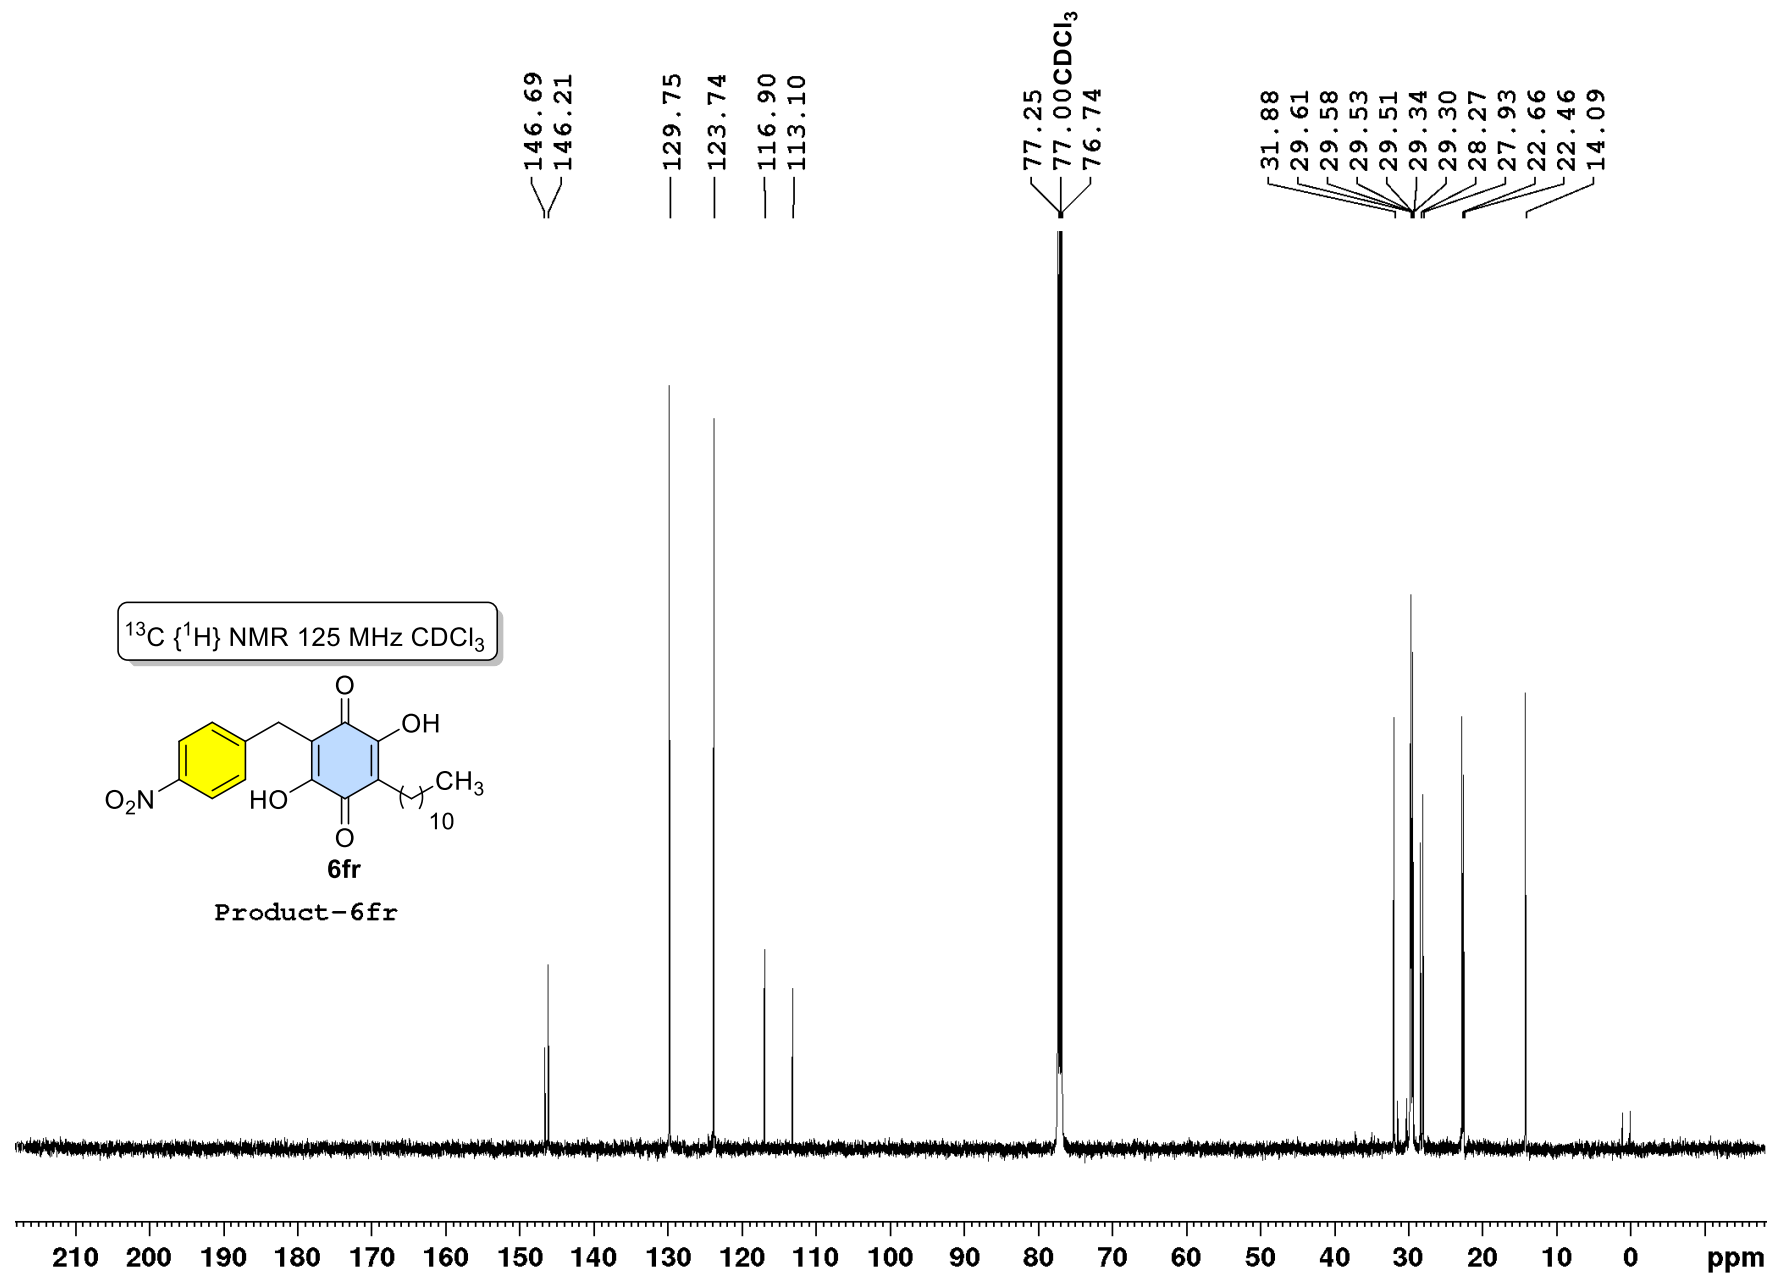



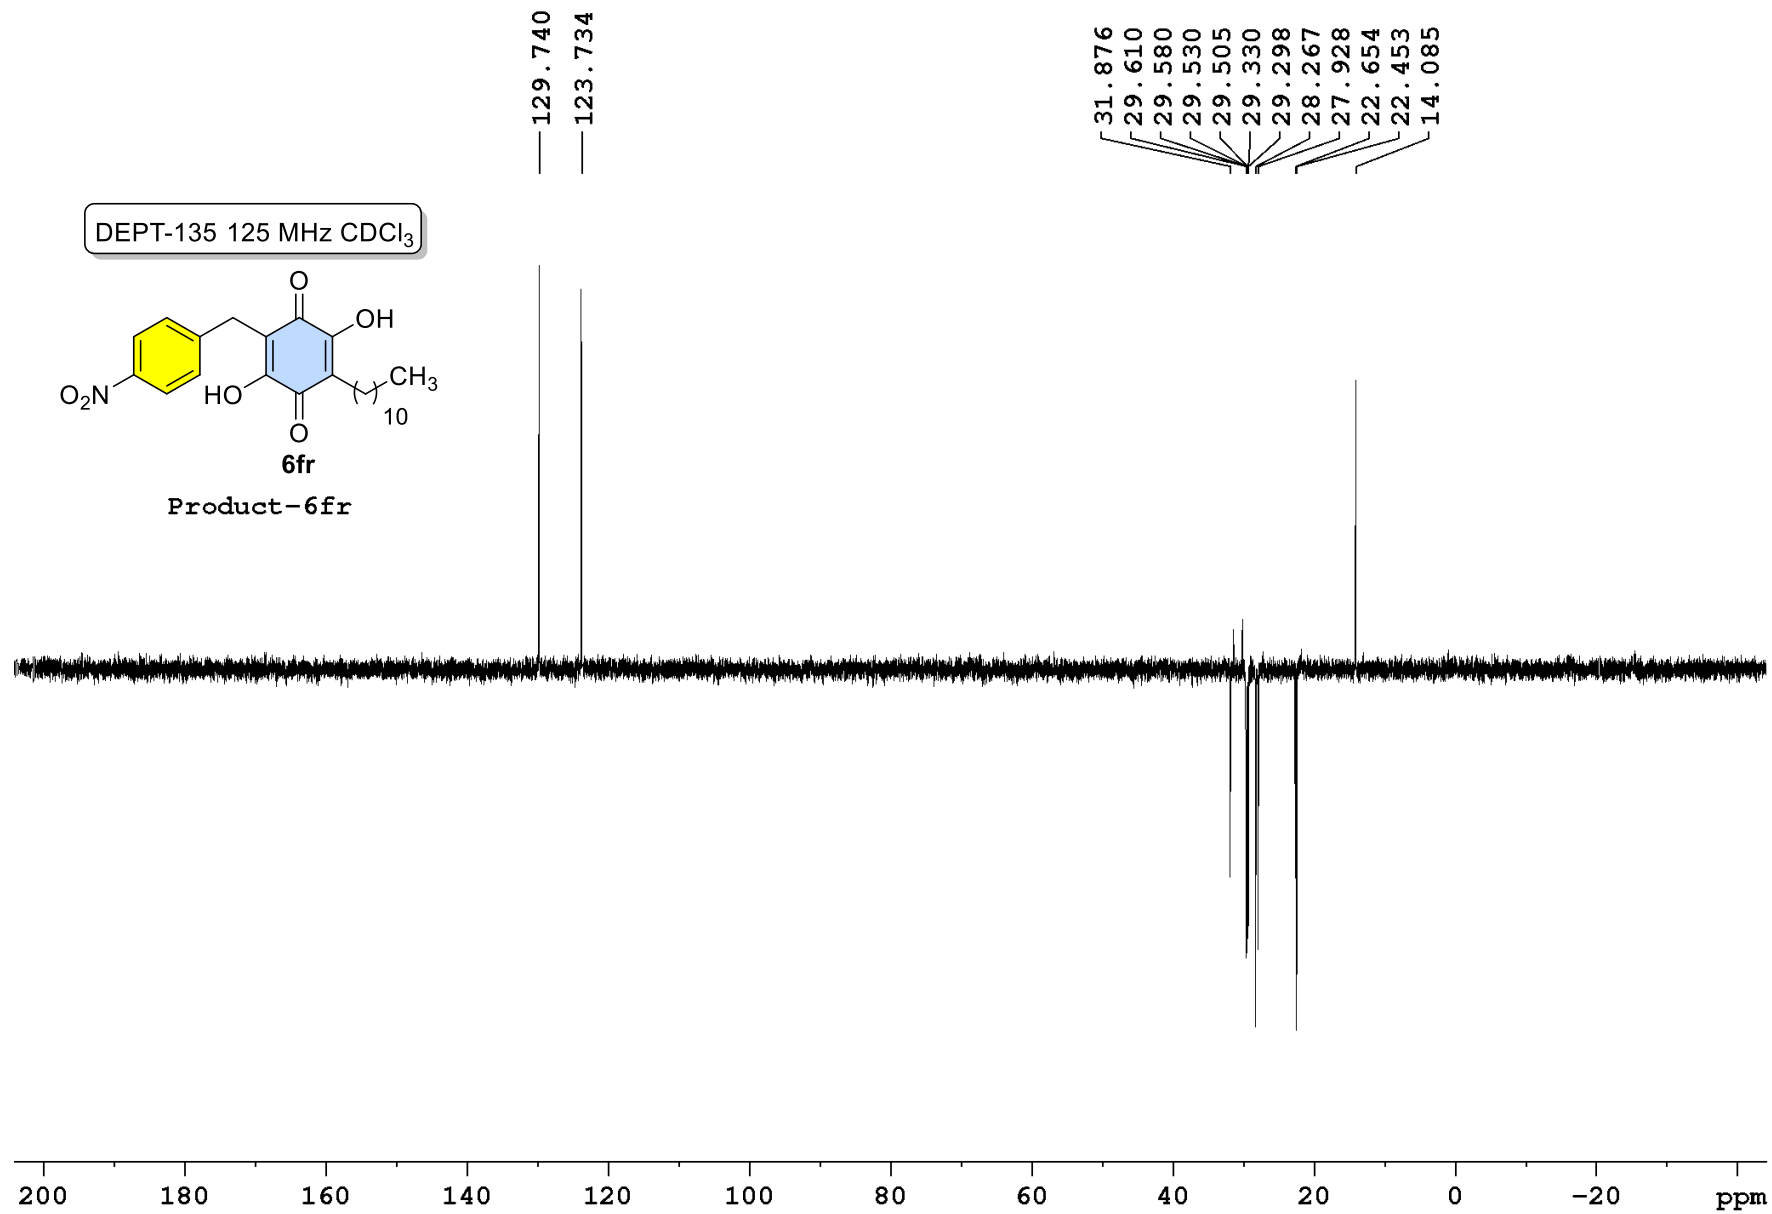

<sup>1</sup>H NMR 500 MHz CDCl<sub>3</sub>

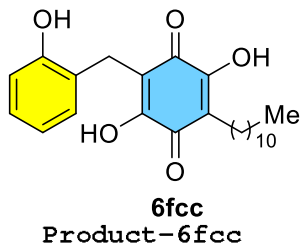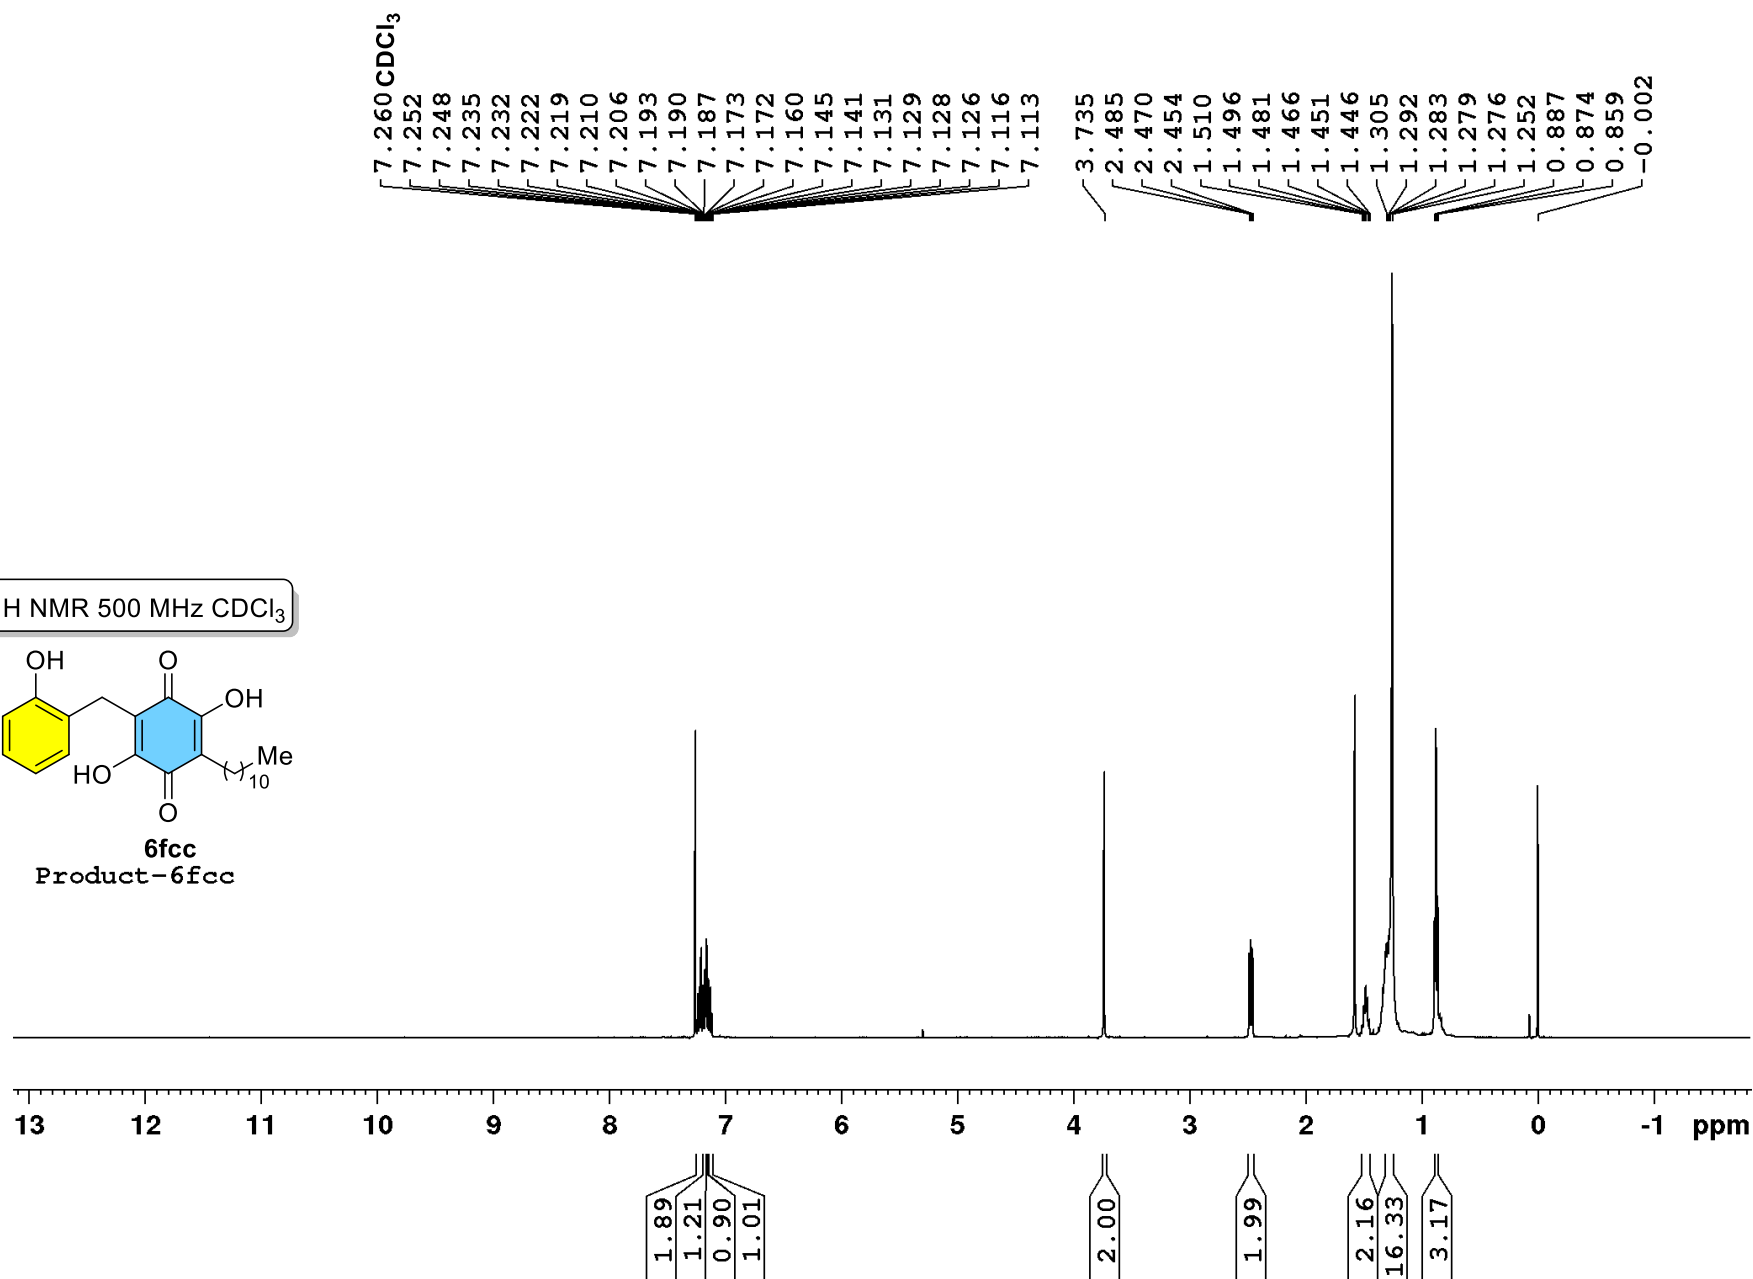

$^{13}\text{C} \{^1\text{H}\}$  NMR 125 MHz  $\text{CDCl}_3$

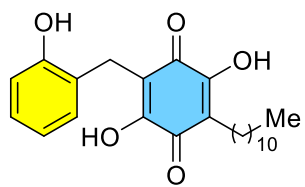

Product-6fcc

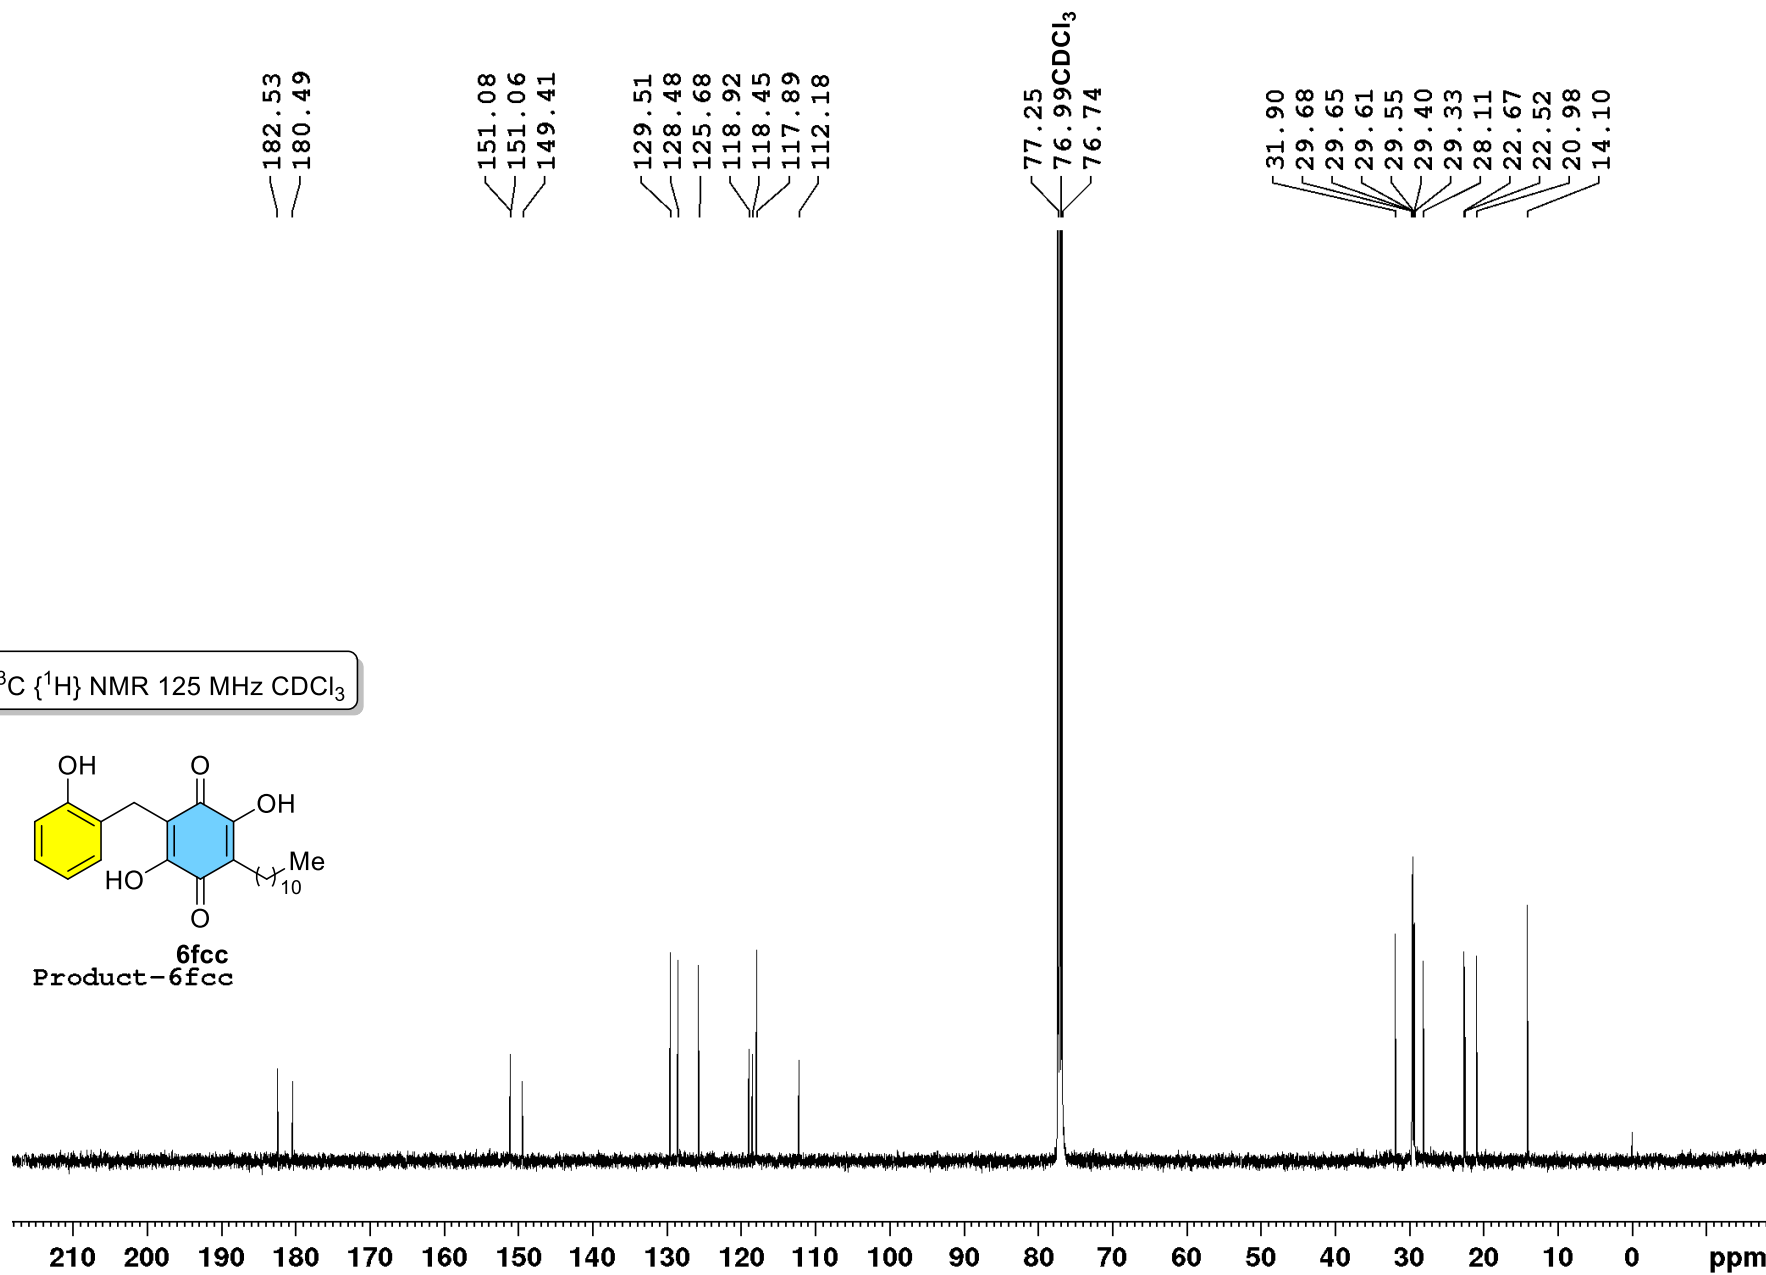

$^{13}\text{C} \{^1\text{H}\}$  NMR 125 MHz  $\text{CDCl}_3$

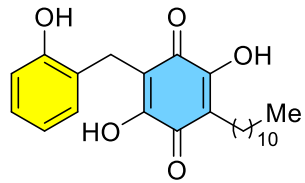

**6fcc**  
Product-6fcc

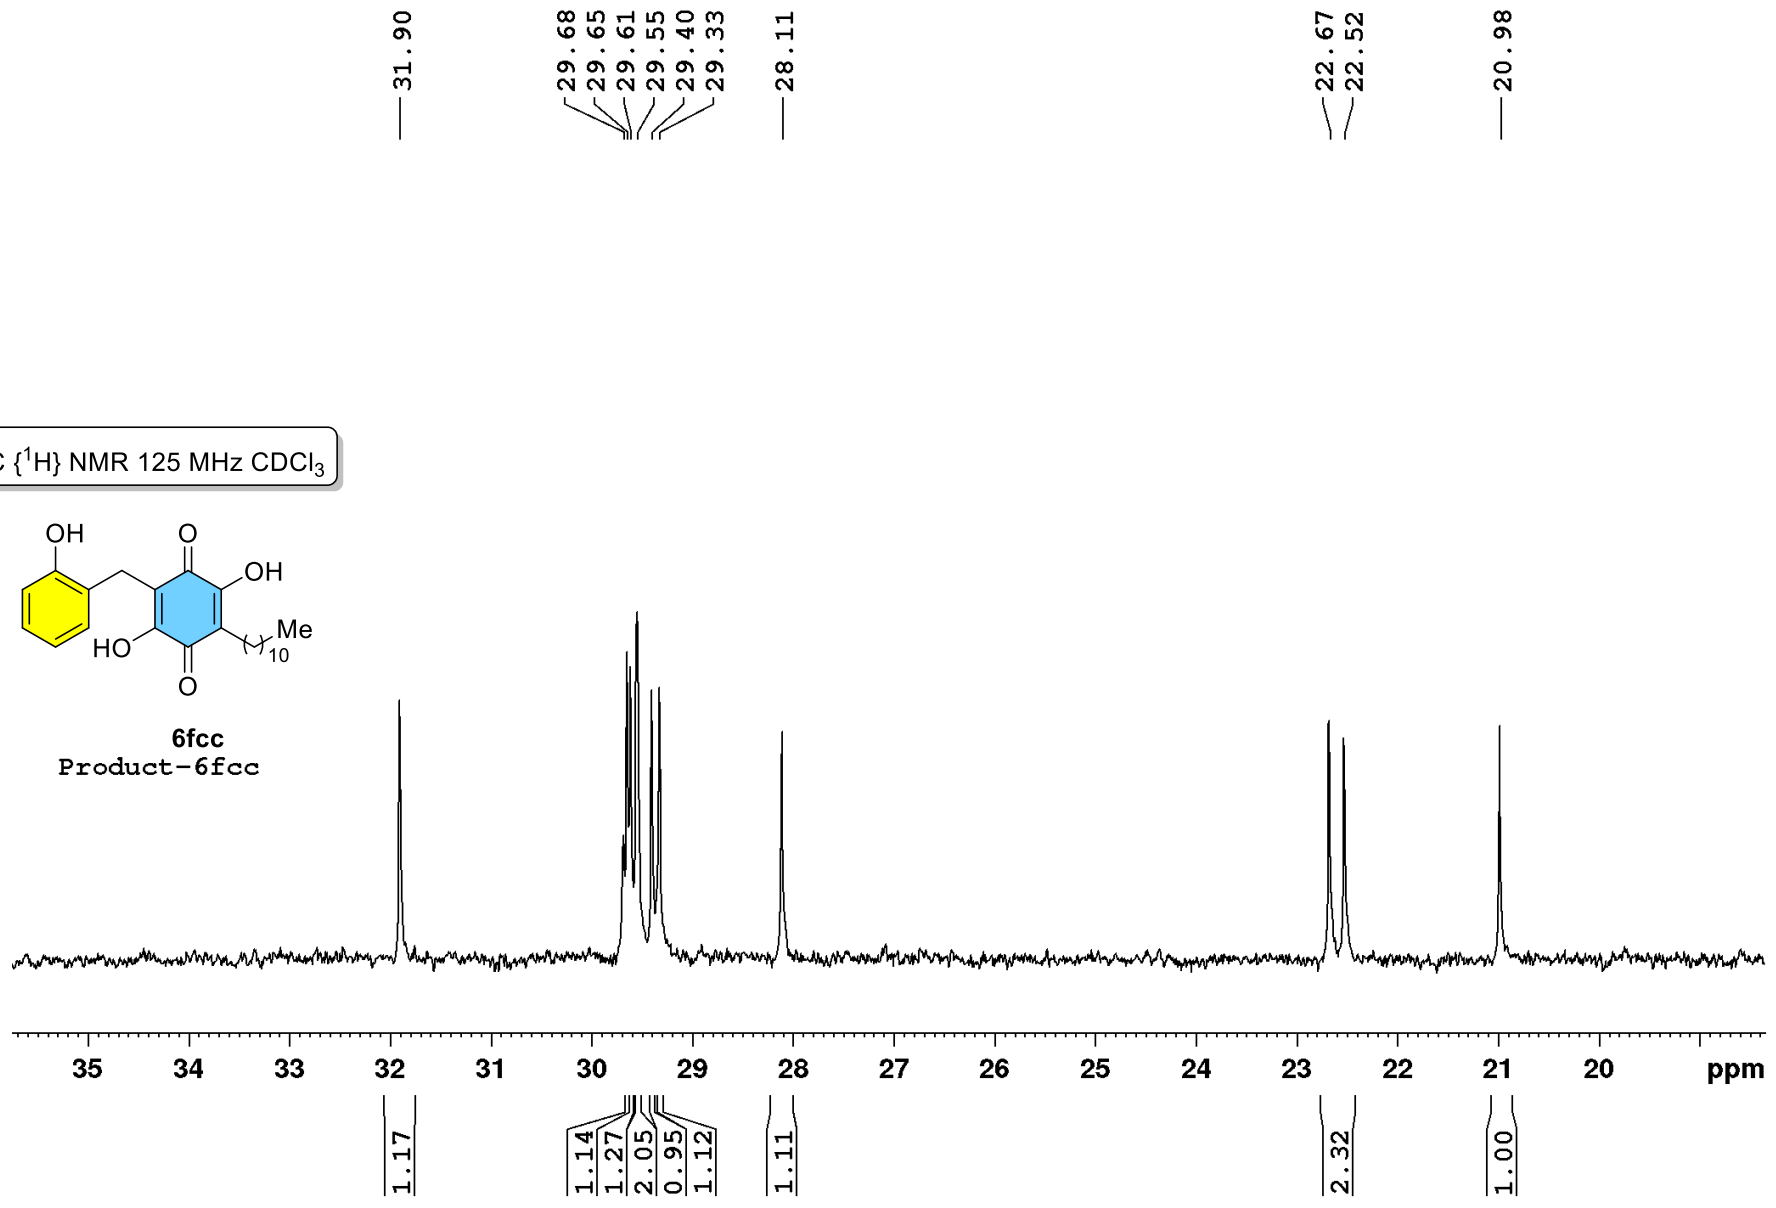

DEPT-135 125 MHz CDCl<sub>3</sub>

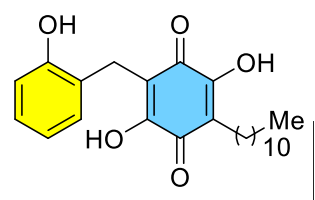

6fca  
Product-6fcc

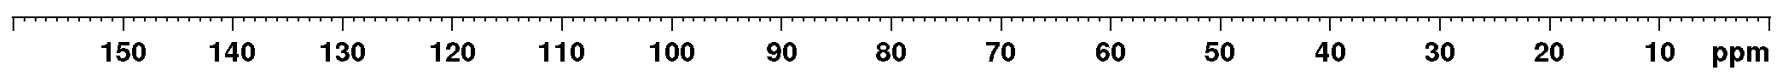

129.53  
128.50  
125.70  
117.91

31.93  
29.67  
29.64  
29.57  
29.43  
29.35  
28.14  
22.70  
22.55  
21.00  
14.13

<sup>1</sup>H NMR 500 MHz CDCl<sub>3</sub>

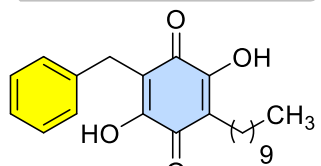

**6ap**  
Product-6ap

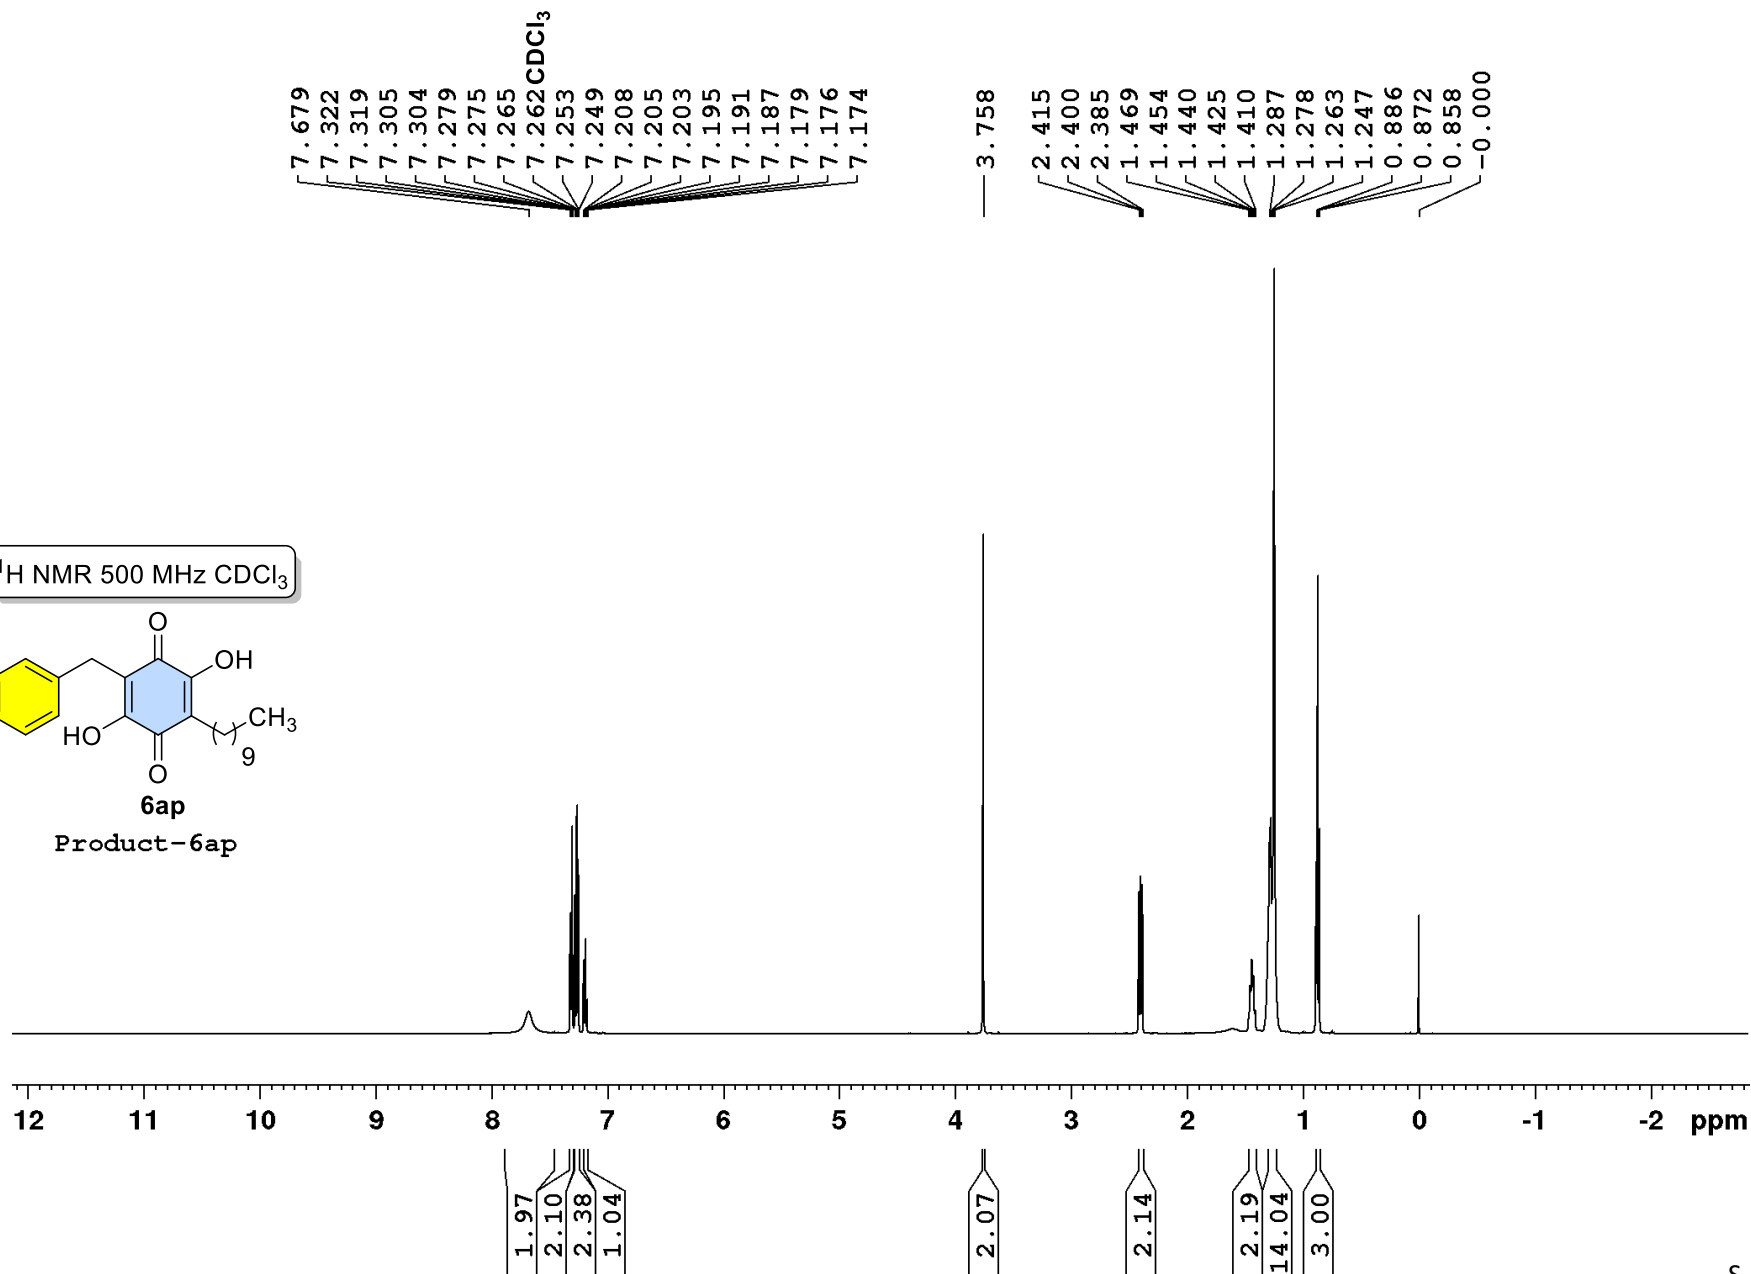

$^{13}\text{C} \{^1\text{H}\}$  NMR 125 MHz  $\text{CDCl}_3$

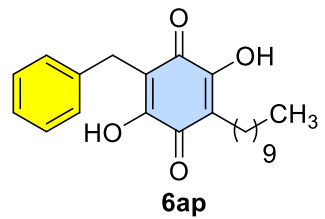

Product-6ap

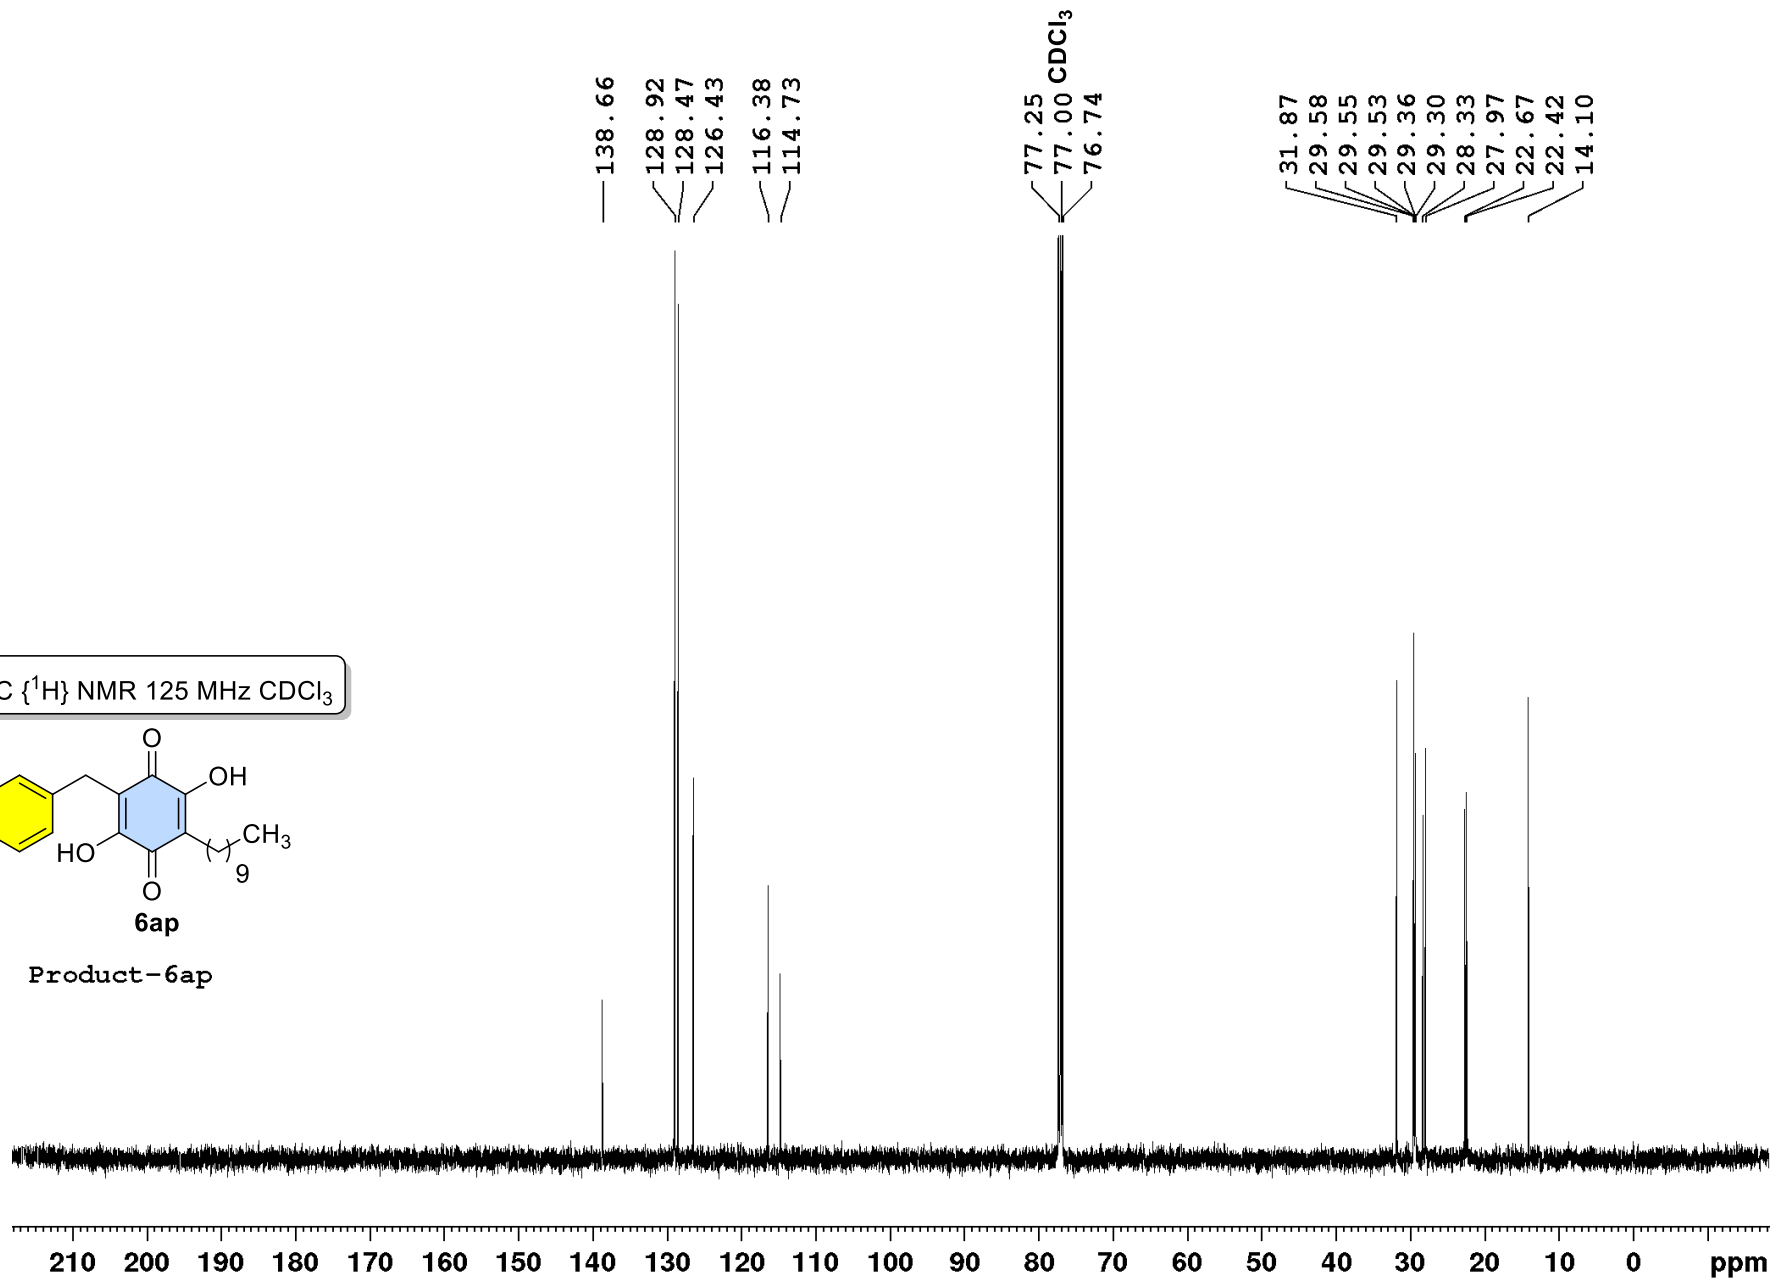

$^{13}\text{C} \{^1\text{H}\}$  NMR 125 MHz  $\text{CDCl}_3$

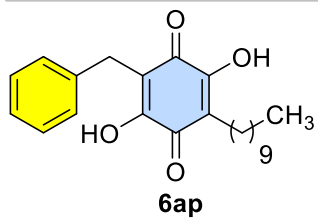

Product-6ap

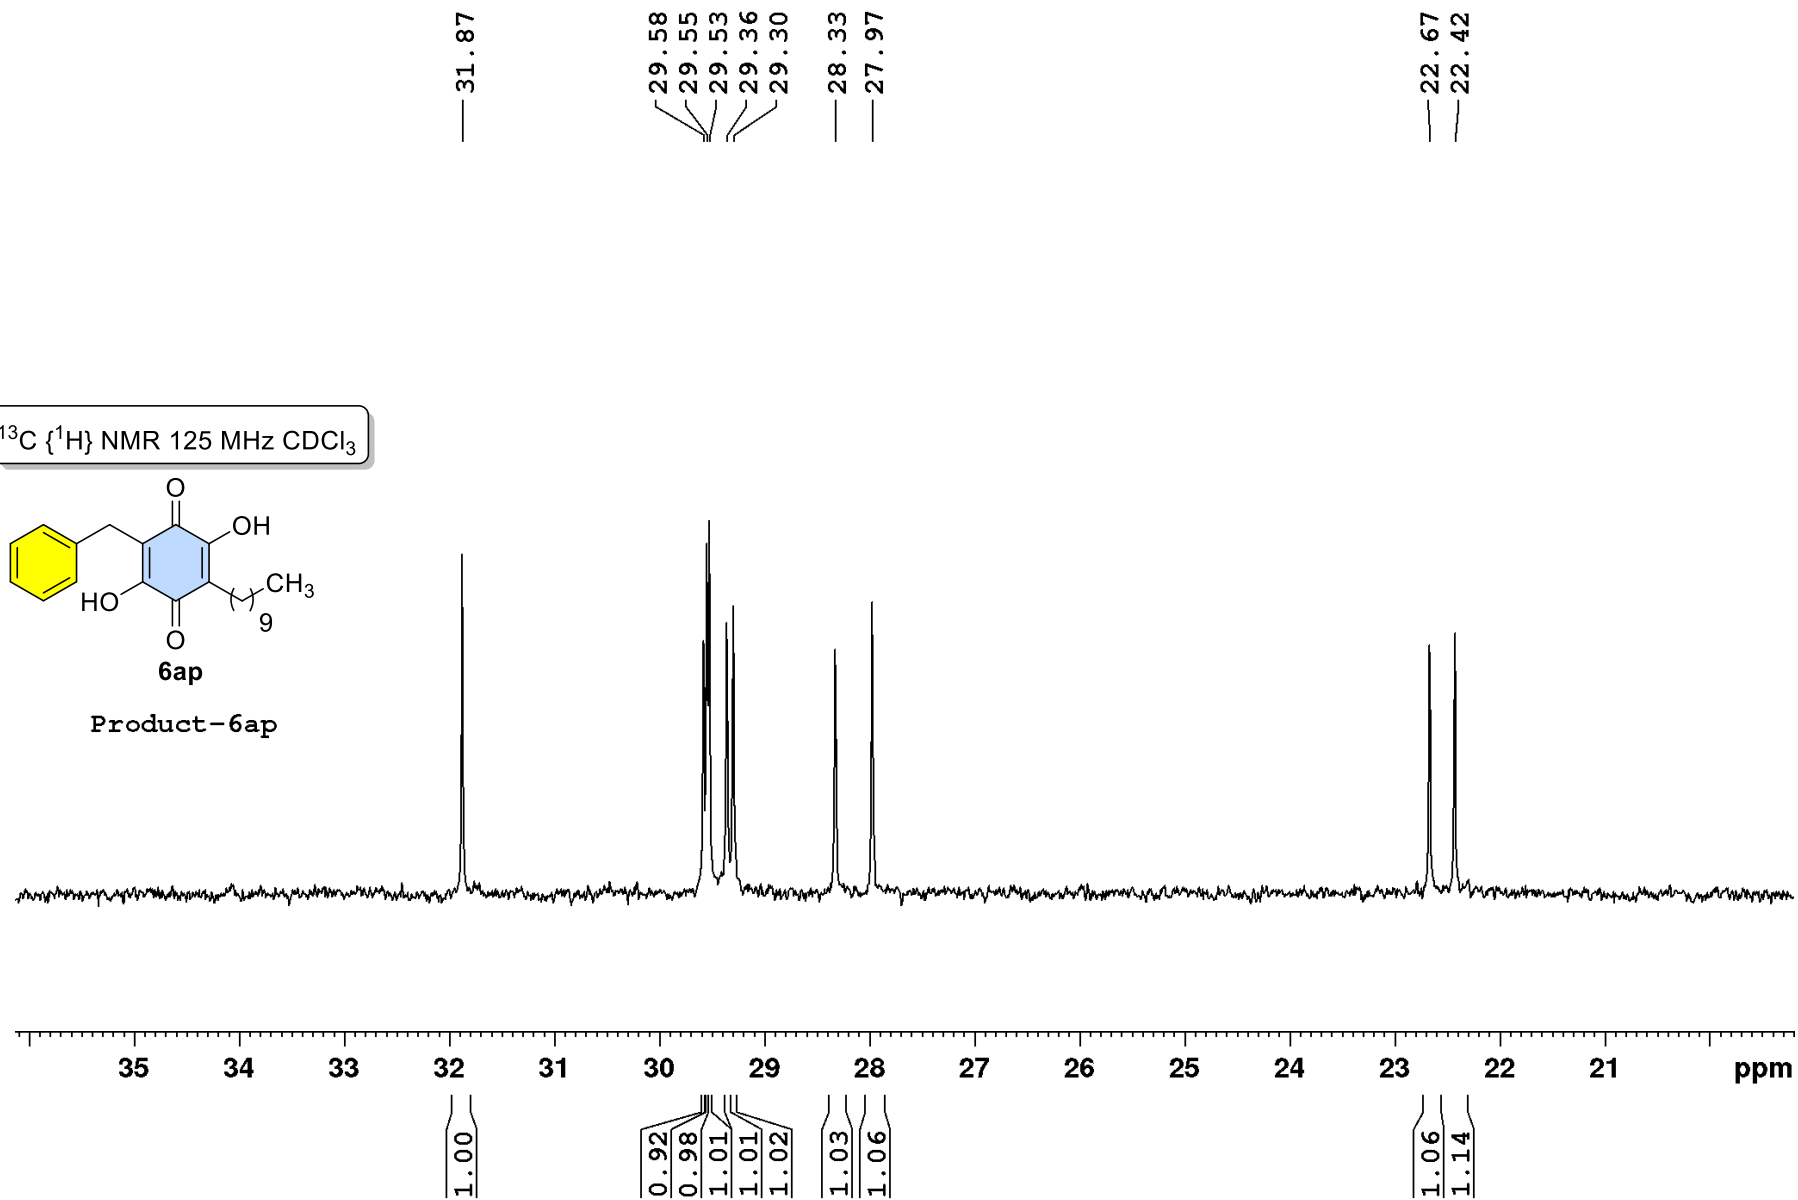



DEPT-135 125 MHz CDCl<sub>3</sub>

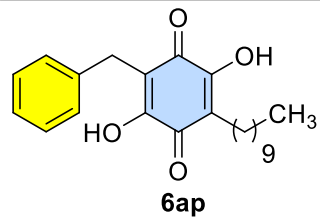

Product-6ap

128.95  
128.50  
126.45

31.90  
29.61  
29.58  
29.55  
29.39  
29.33  
28.35  
28.00  
22.69  
22.45  
14.13

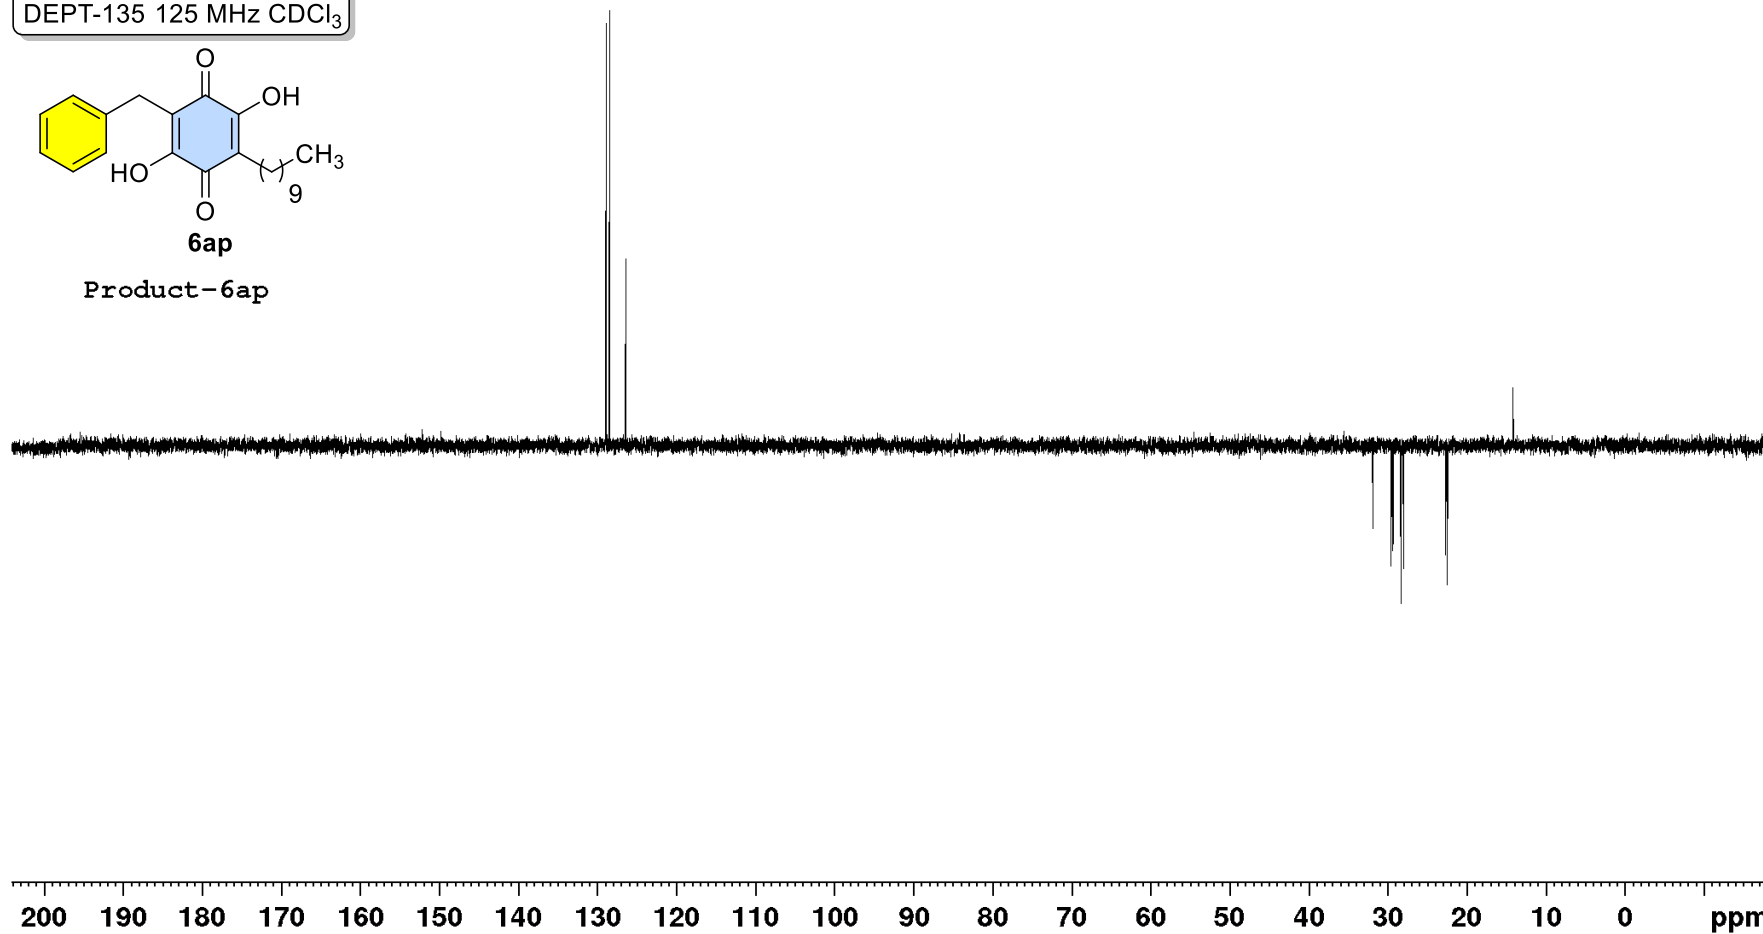

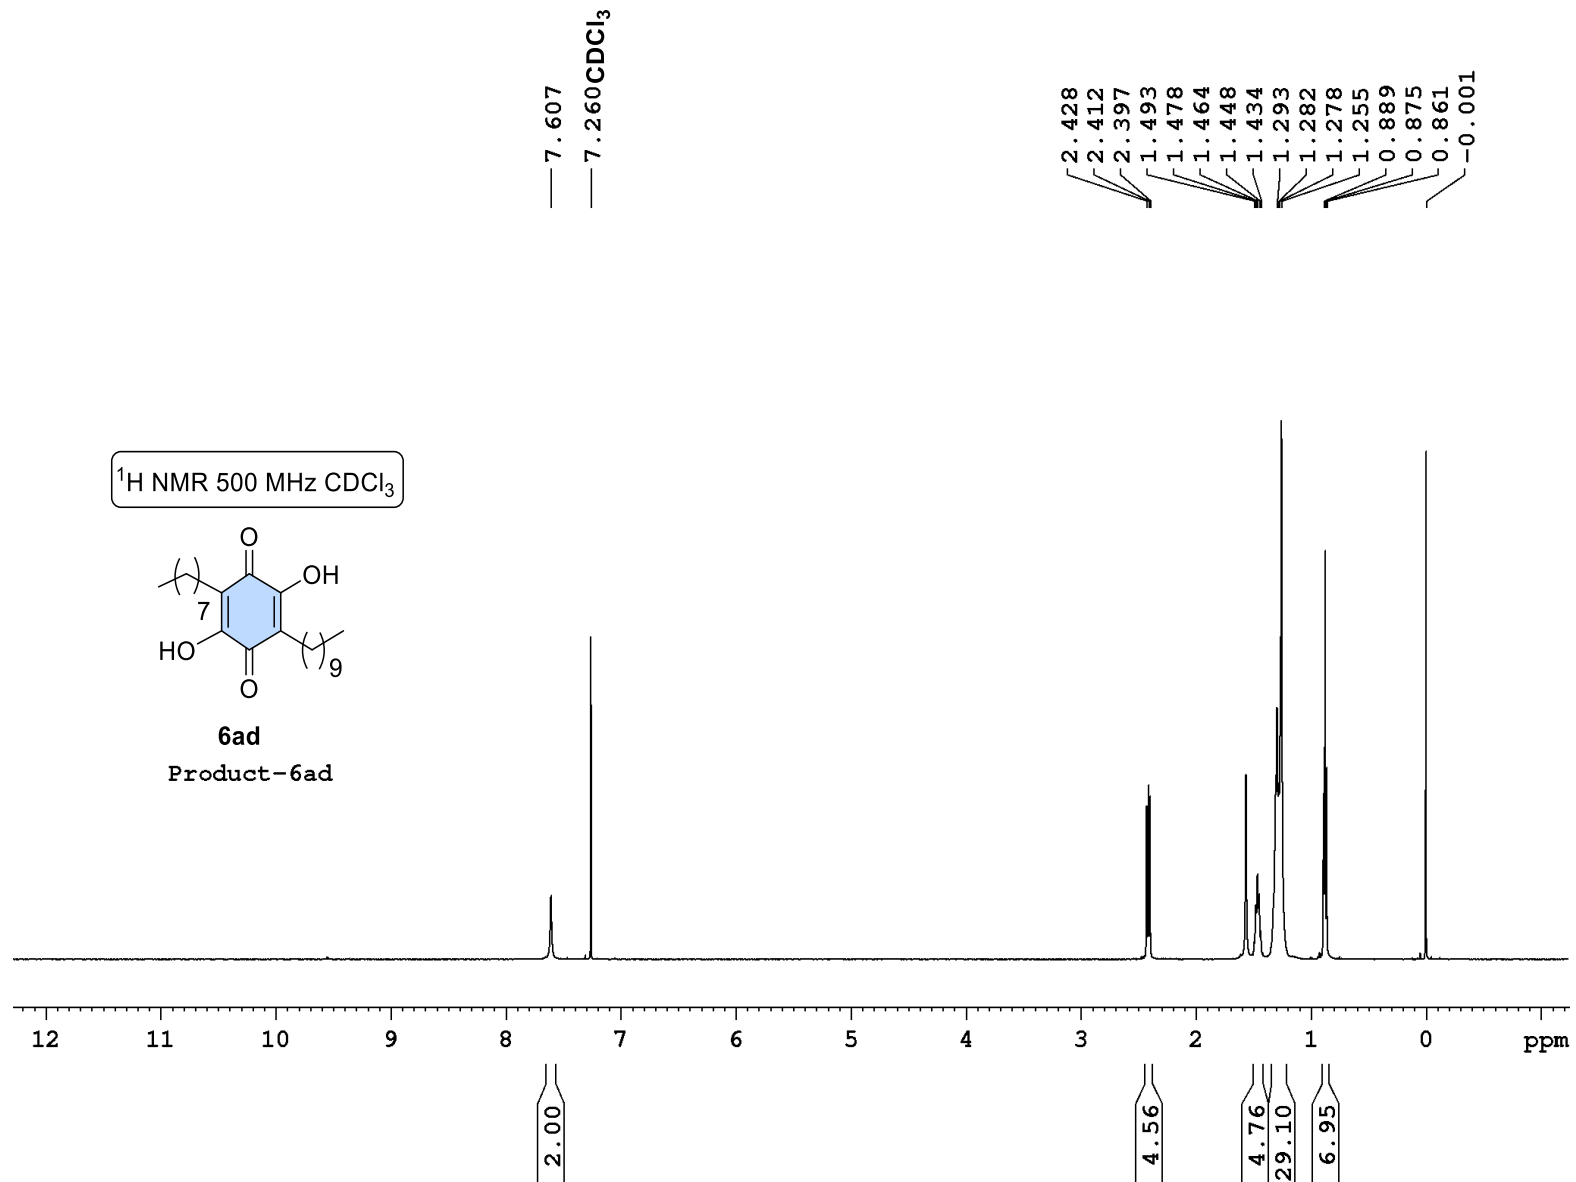

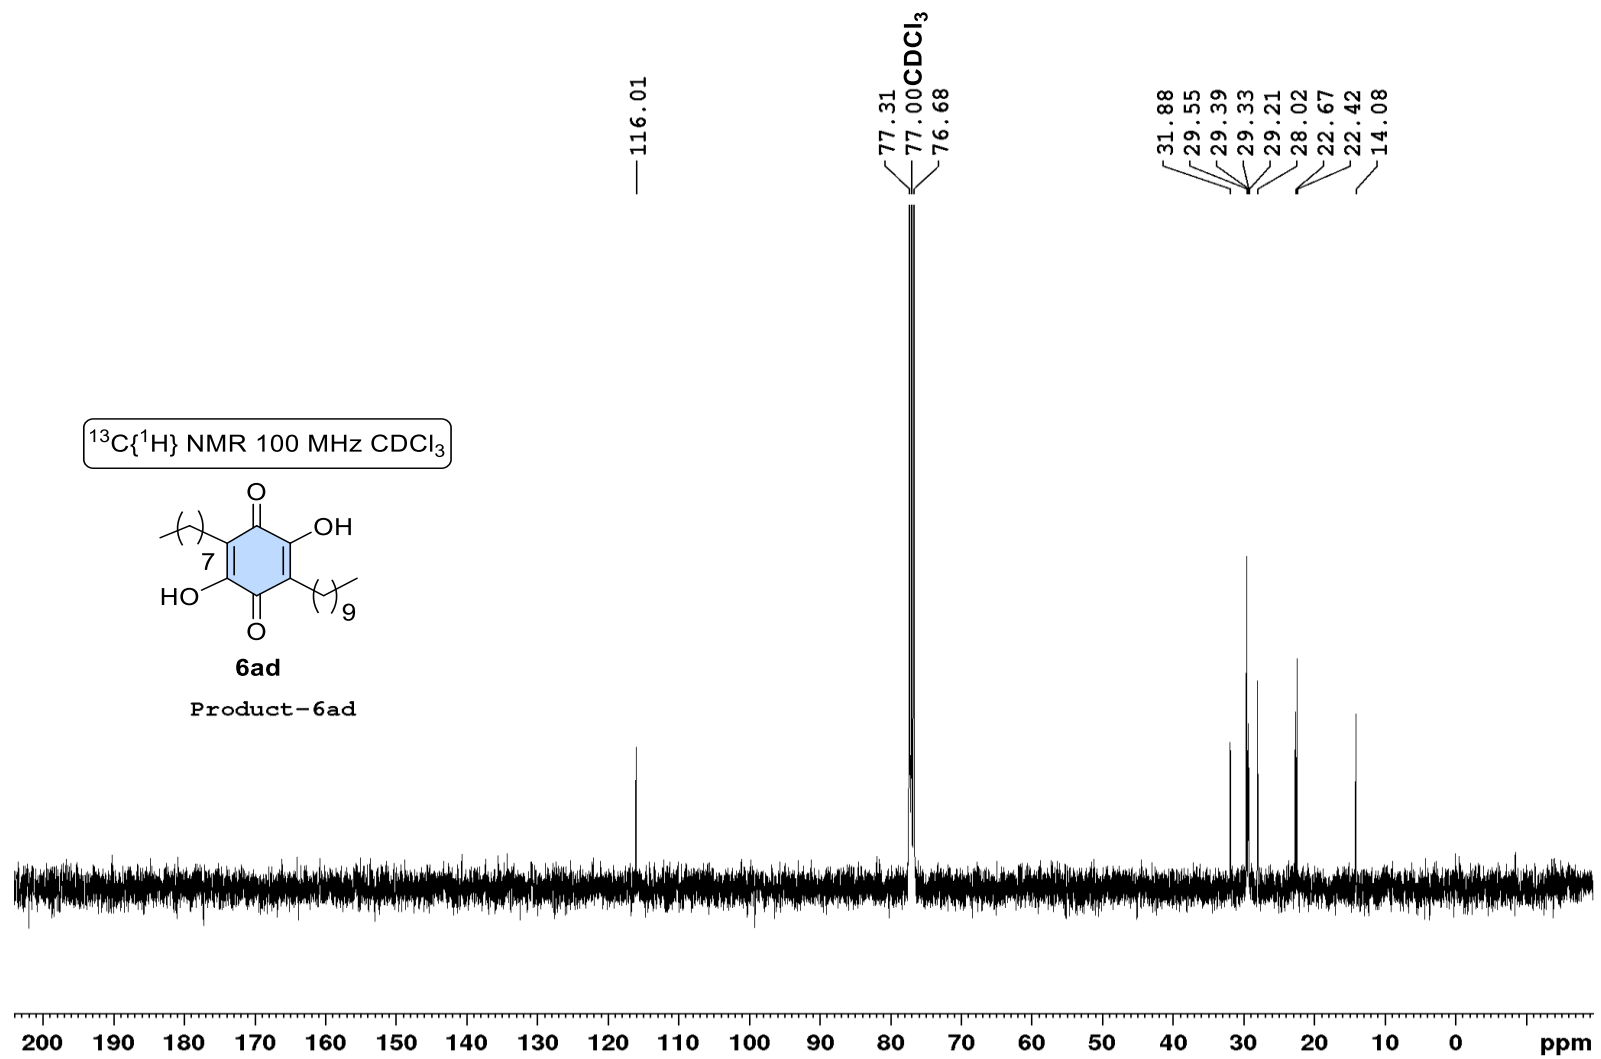

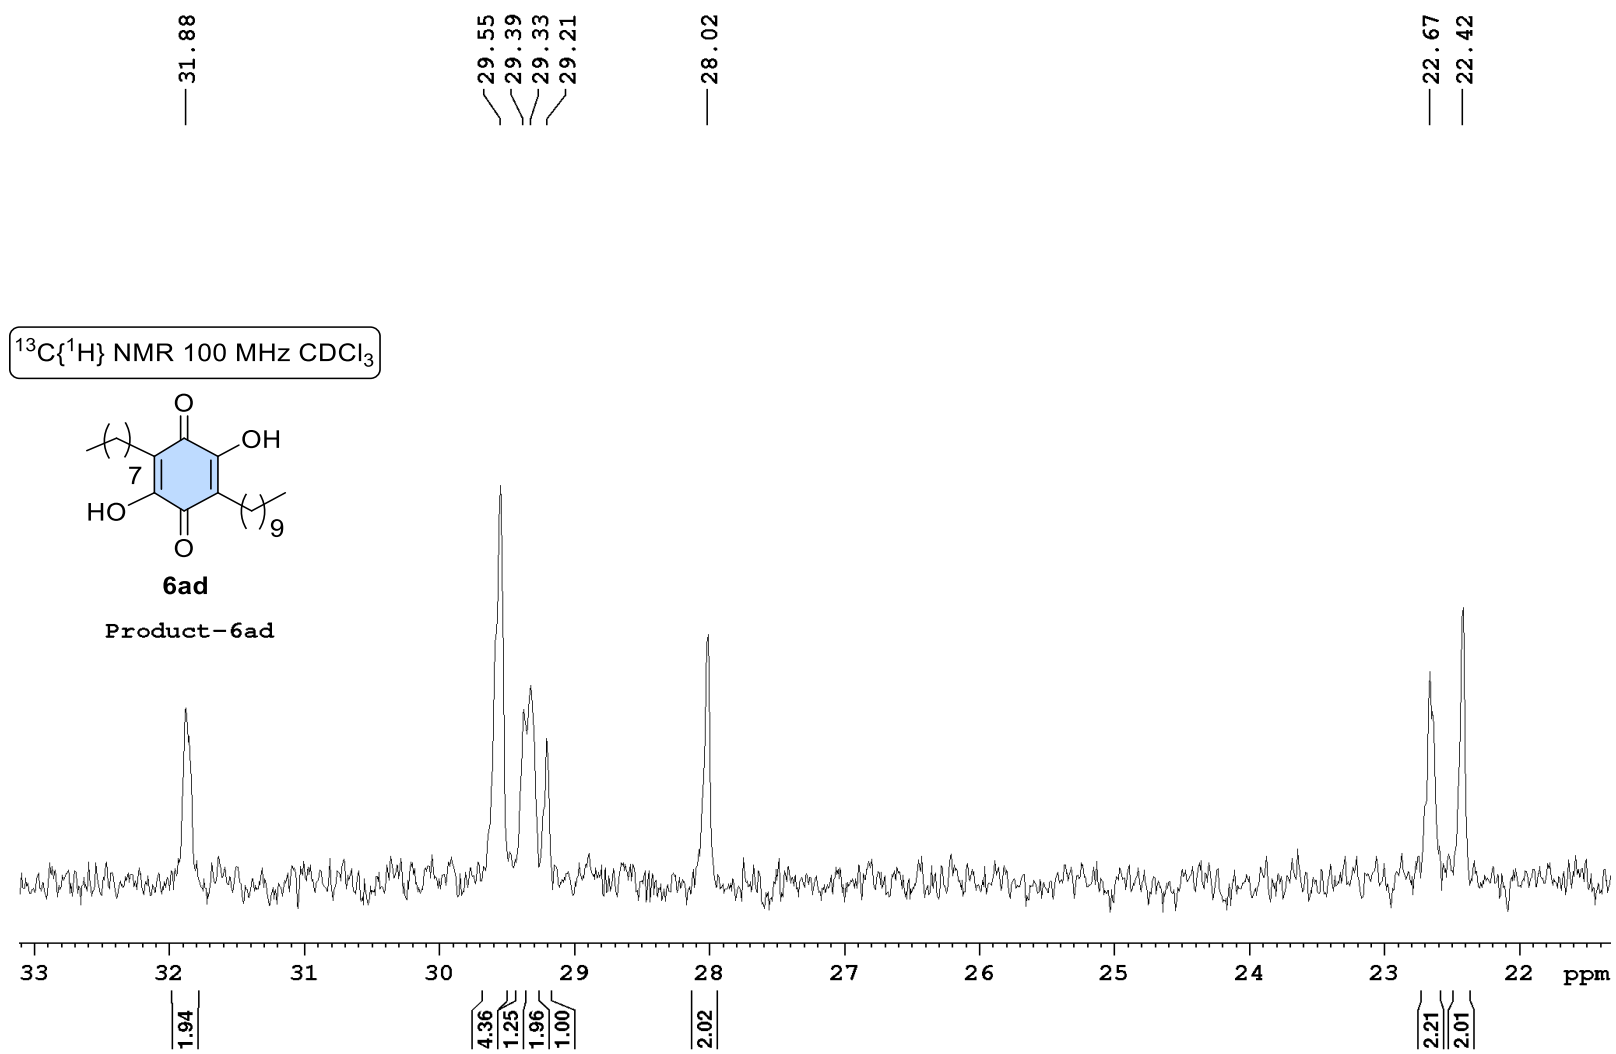

<sup>1</sup>H NMR 500 MHz CDCl<sub>3</sub>

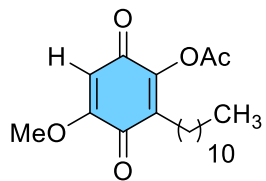

**22f**  
Product-22f

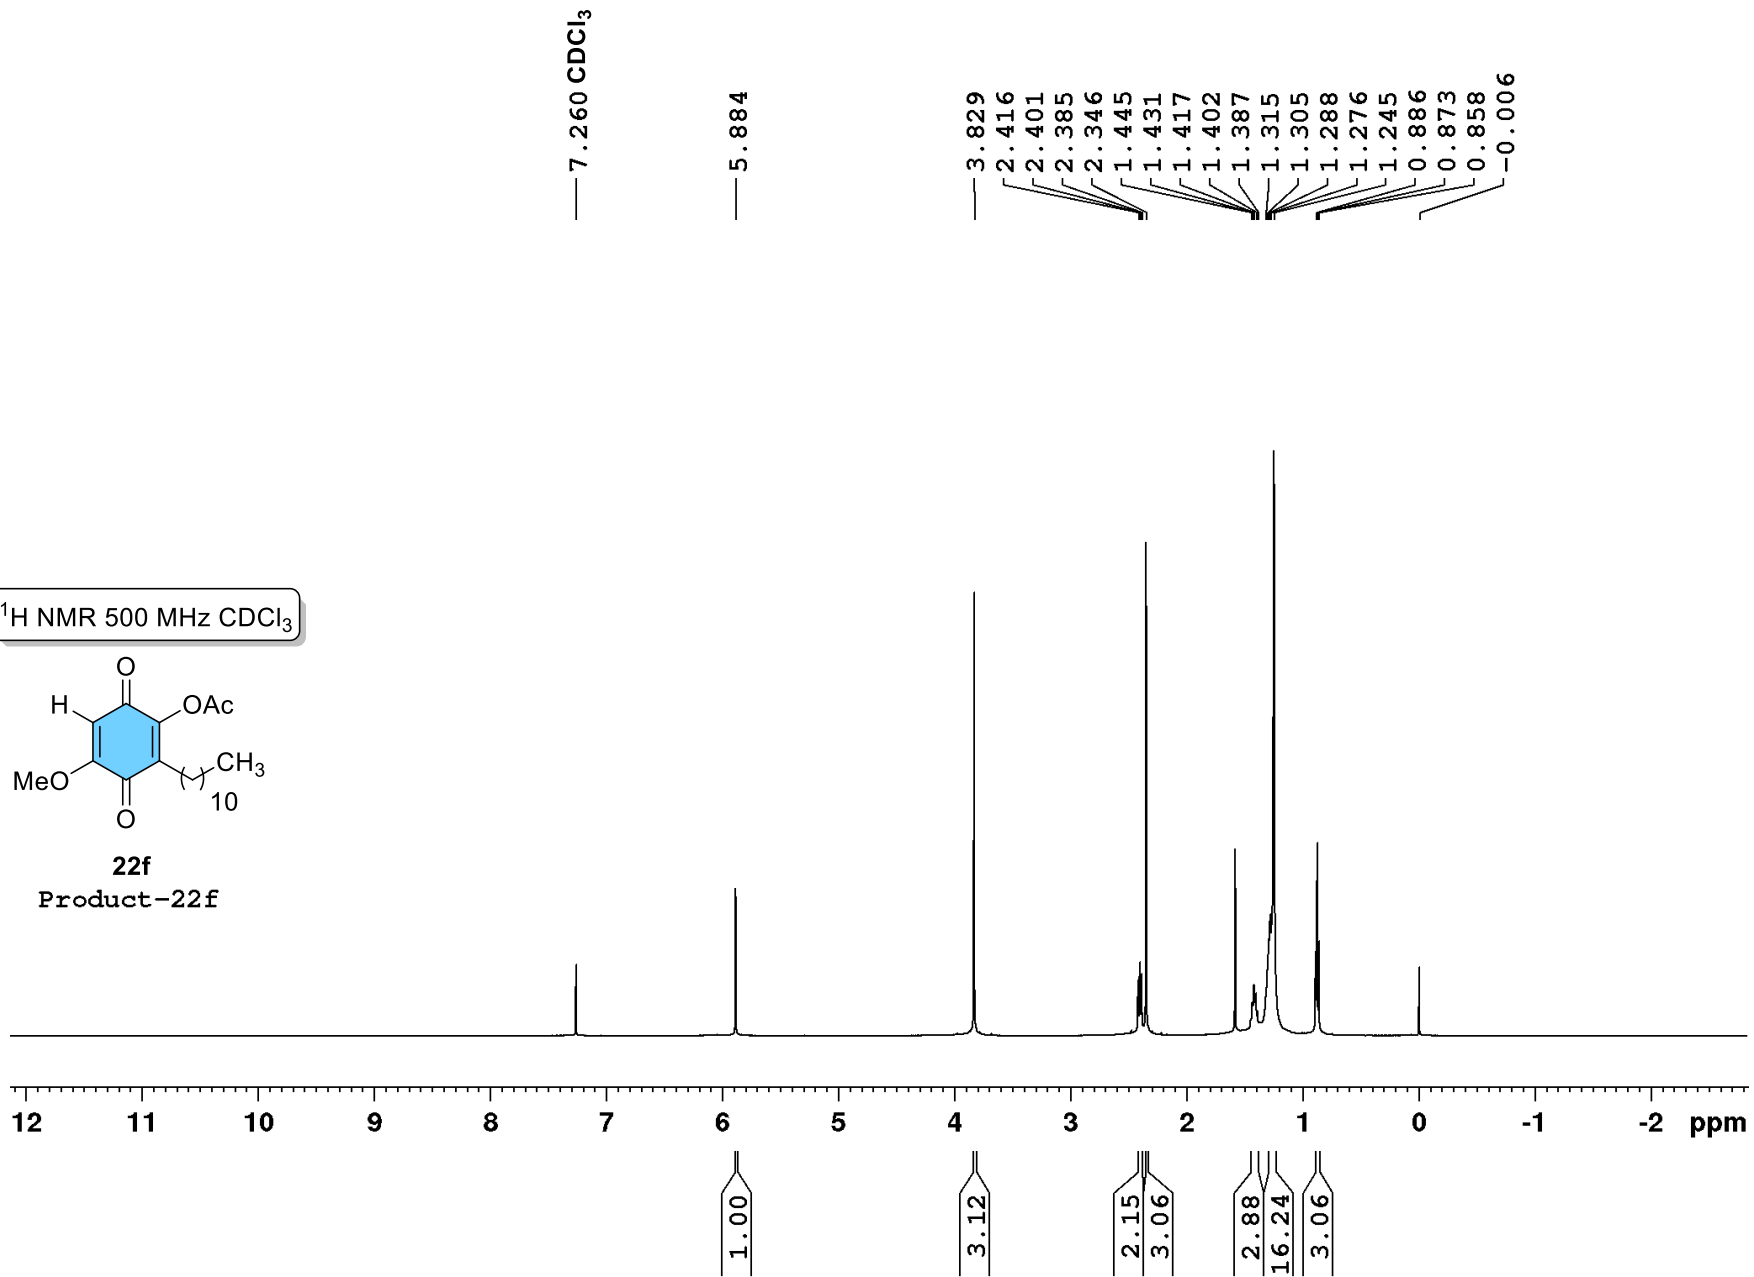

$^{13}\text{C} \{^1\text{H}\}$  NMR 100 MHz  $\text{CDCl}_3$

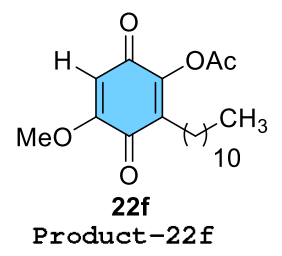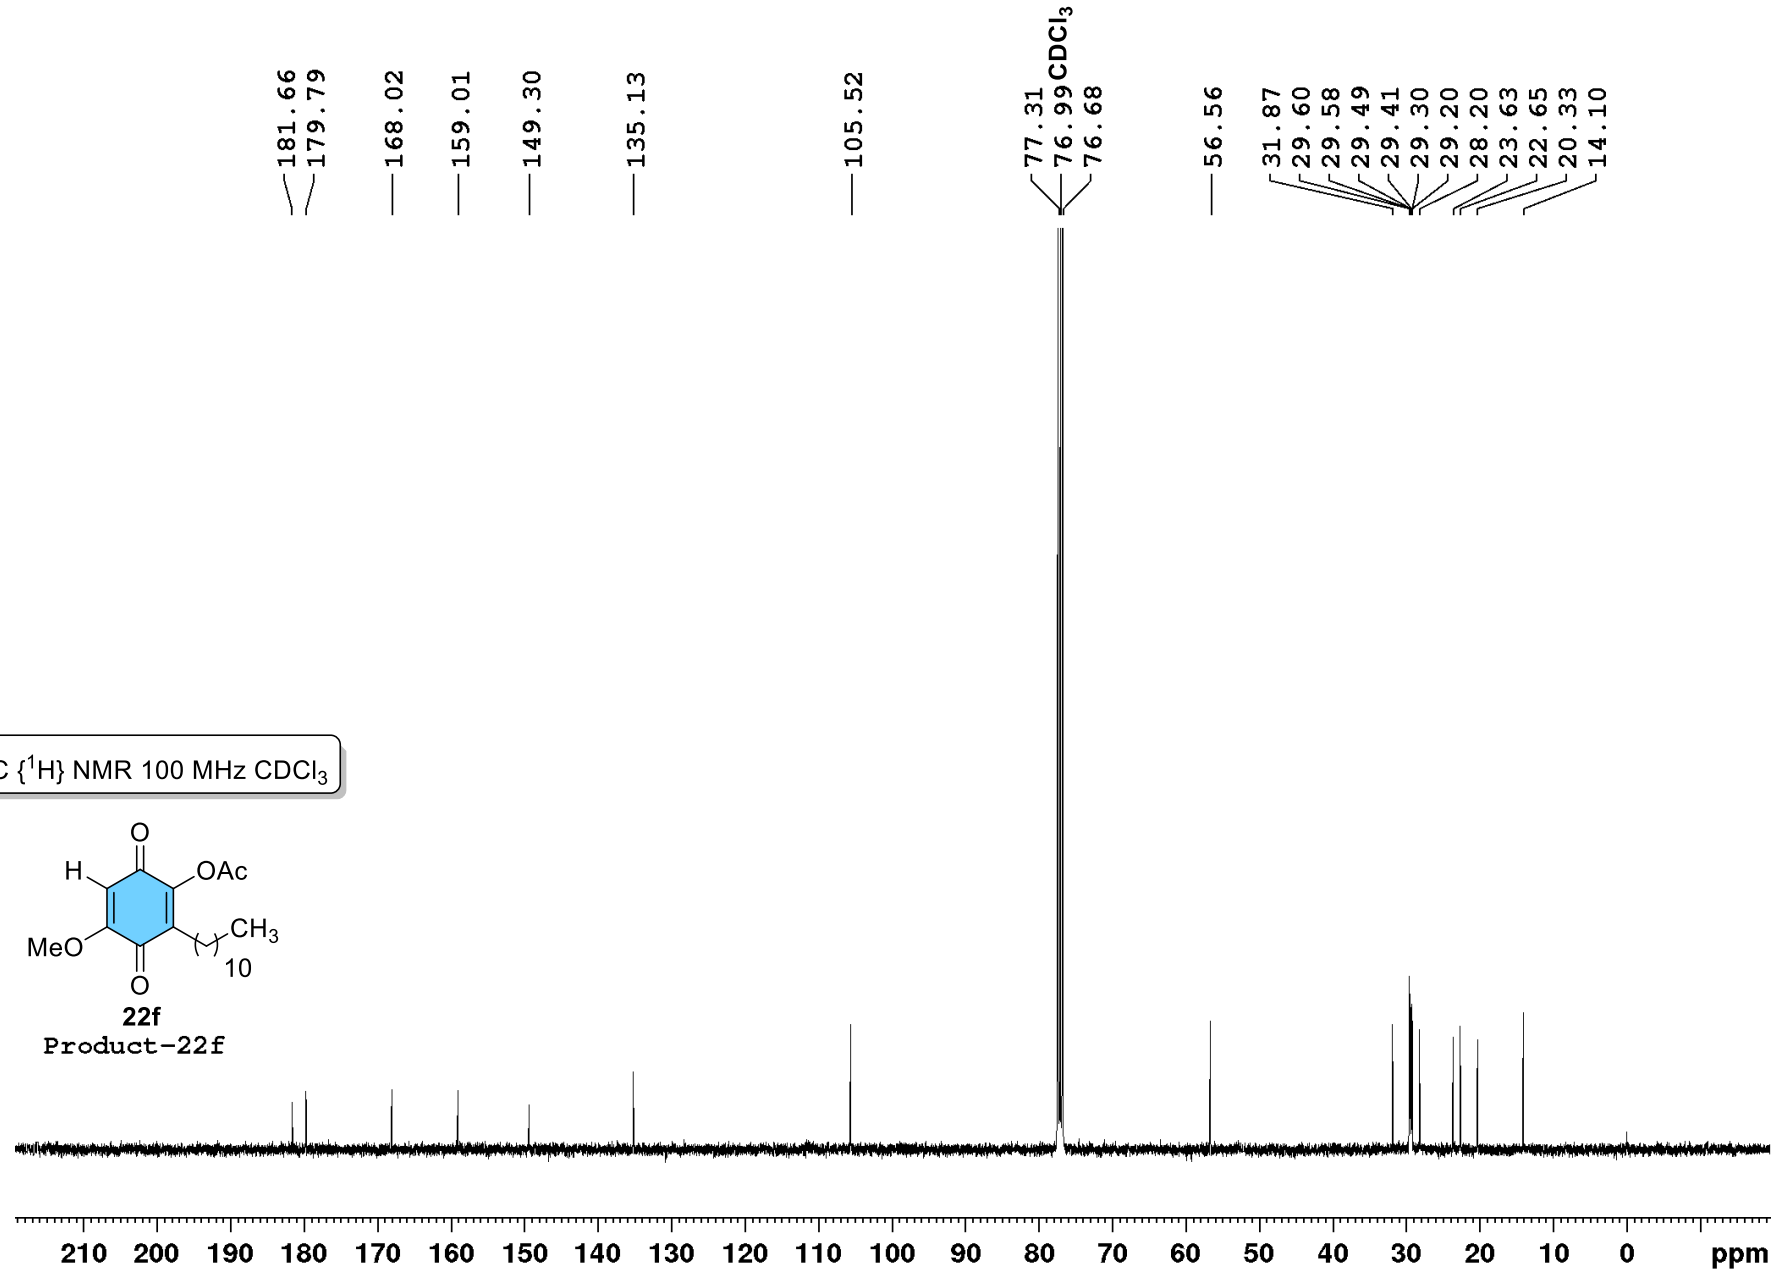

$^{13}\text{C} \{^1\text{H}\}$  NMR 100 MHz  $\text{CDCl}_3$

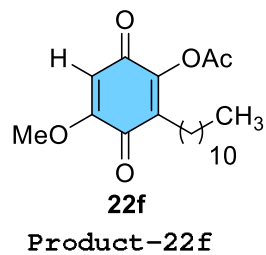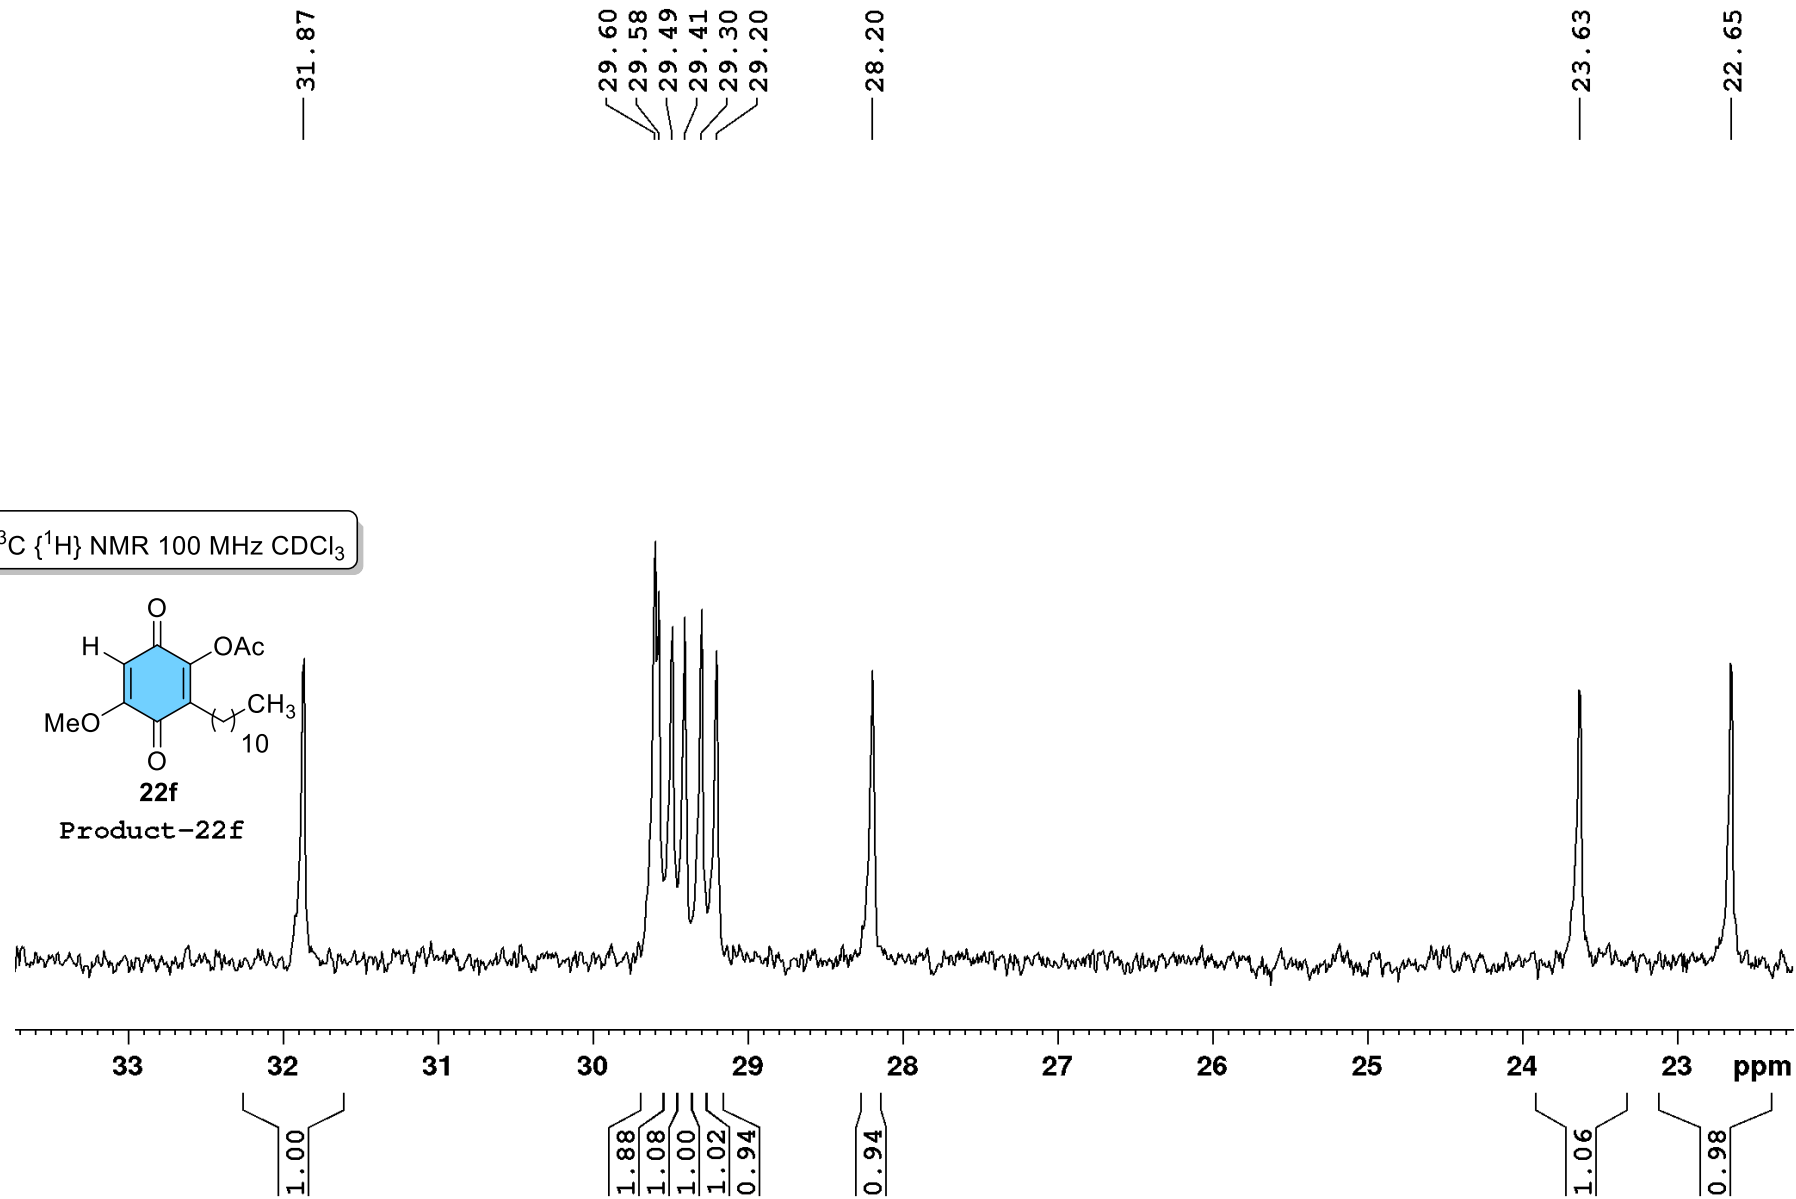

DEPT-135 NMR 100 MHz CDCl<sub>3</sub>

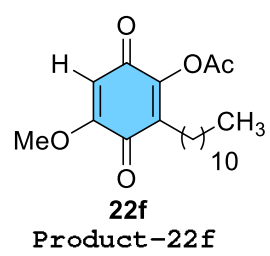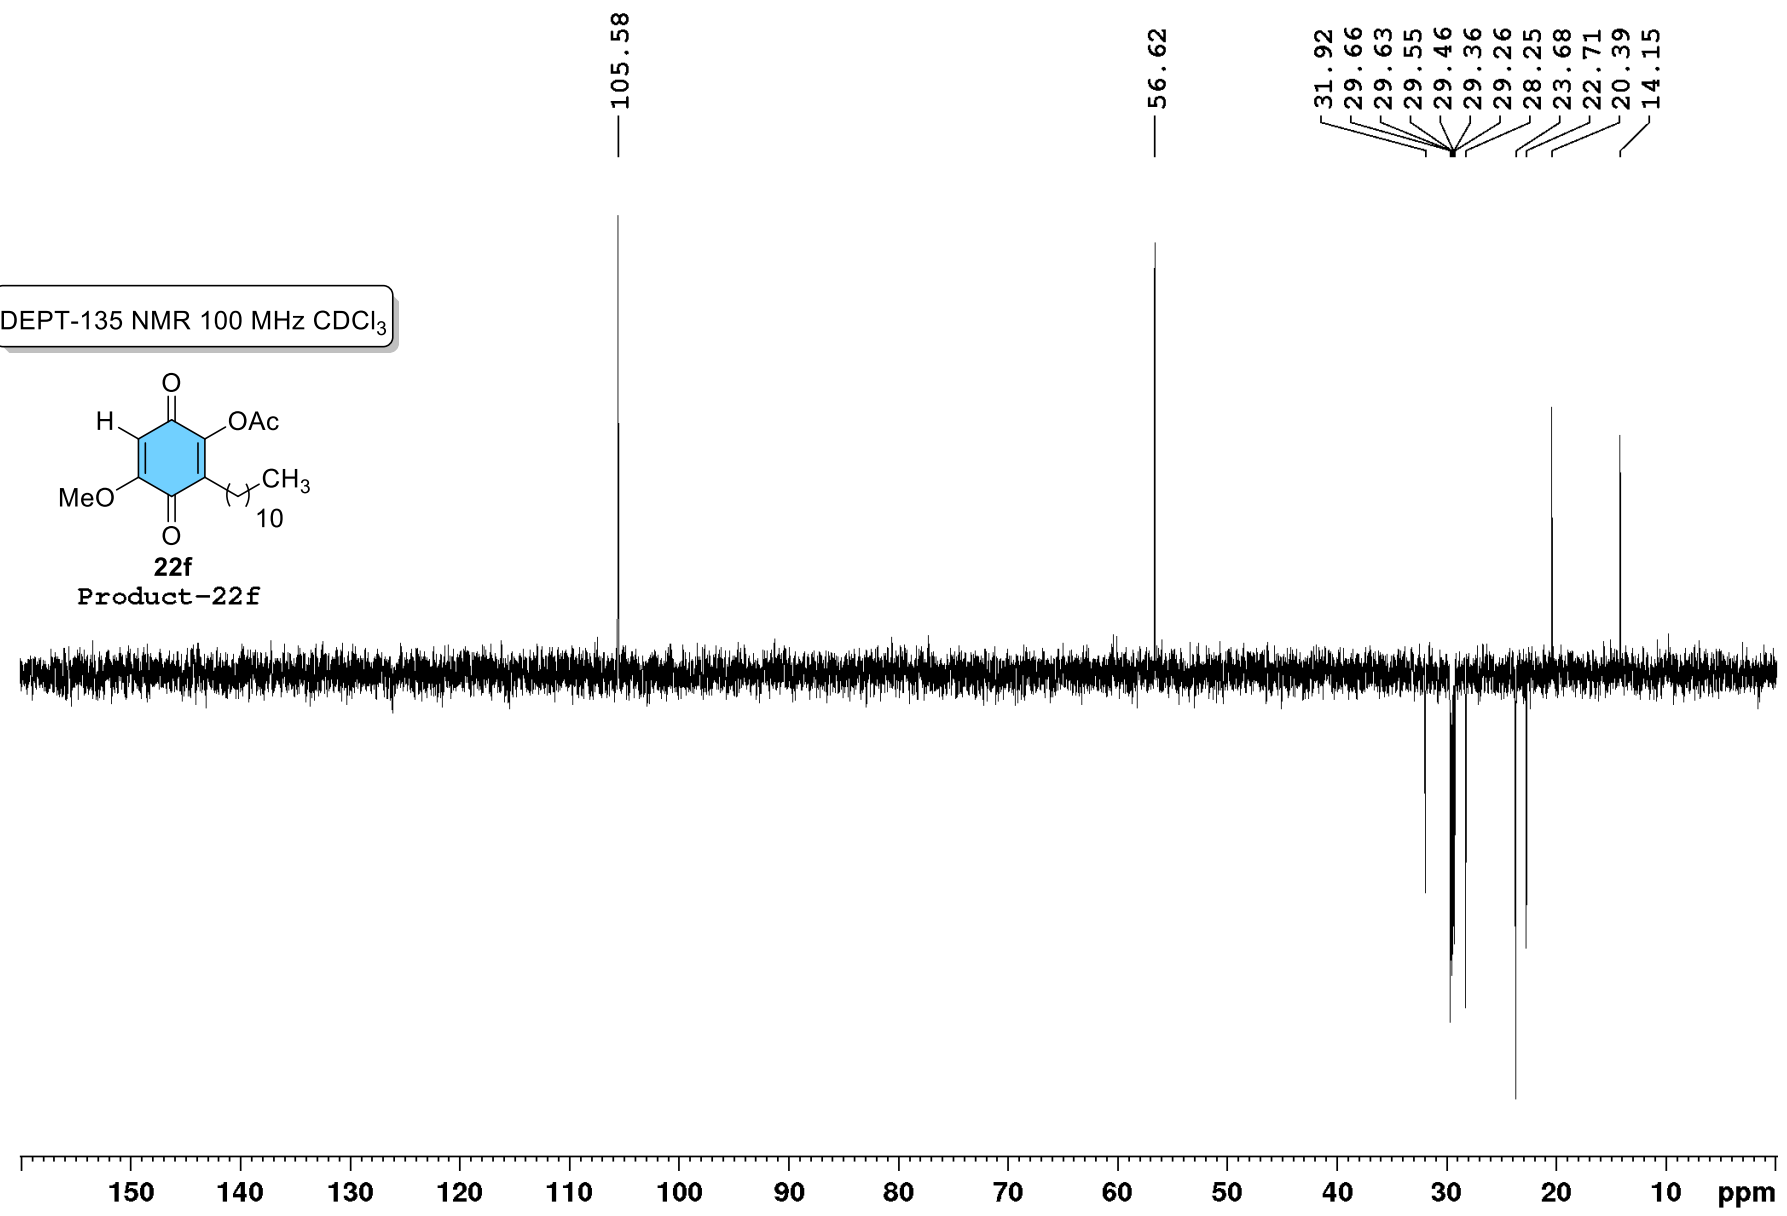



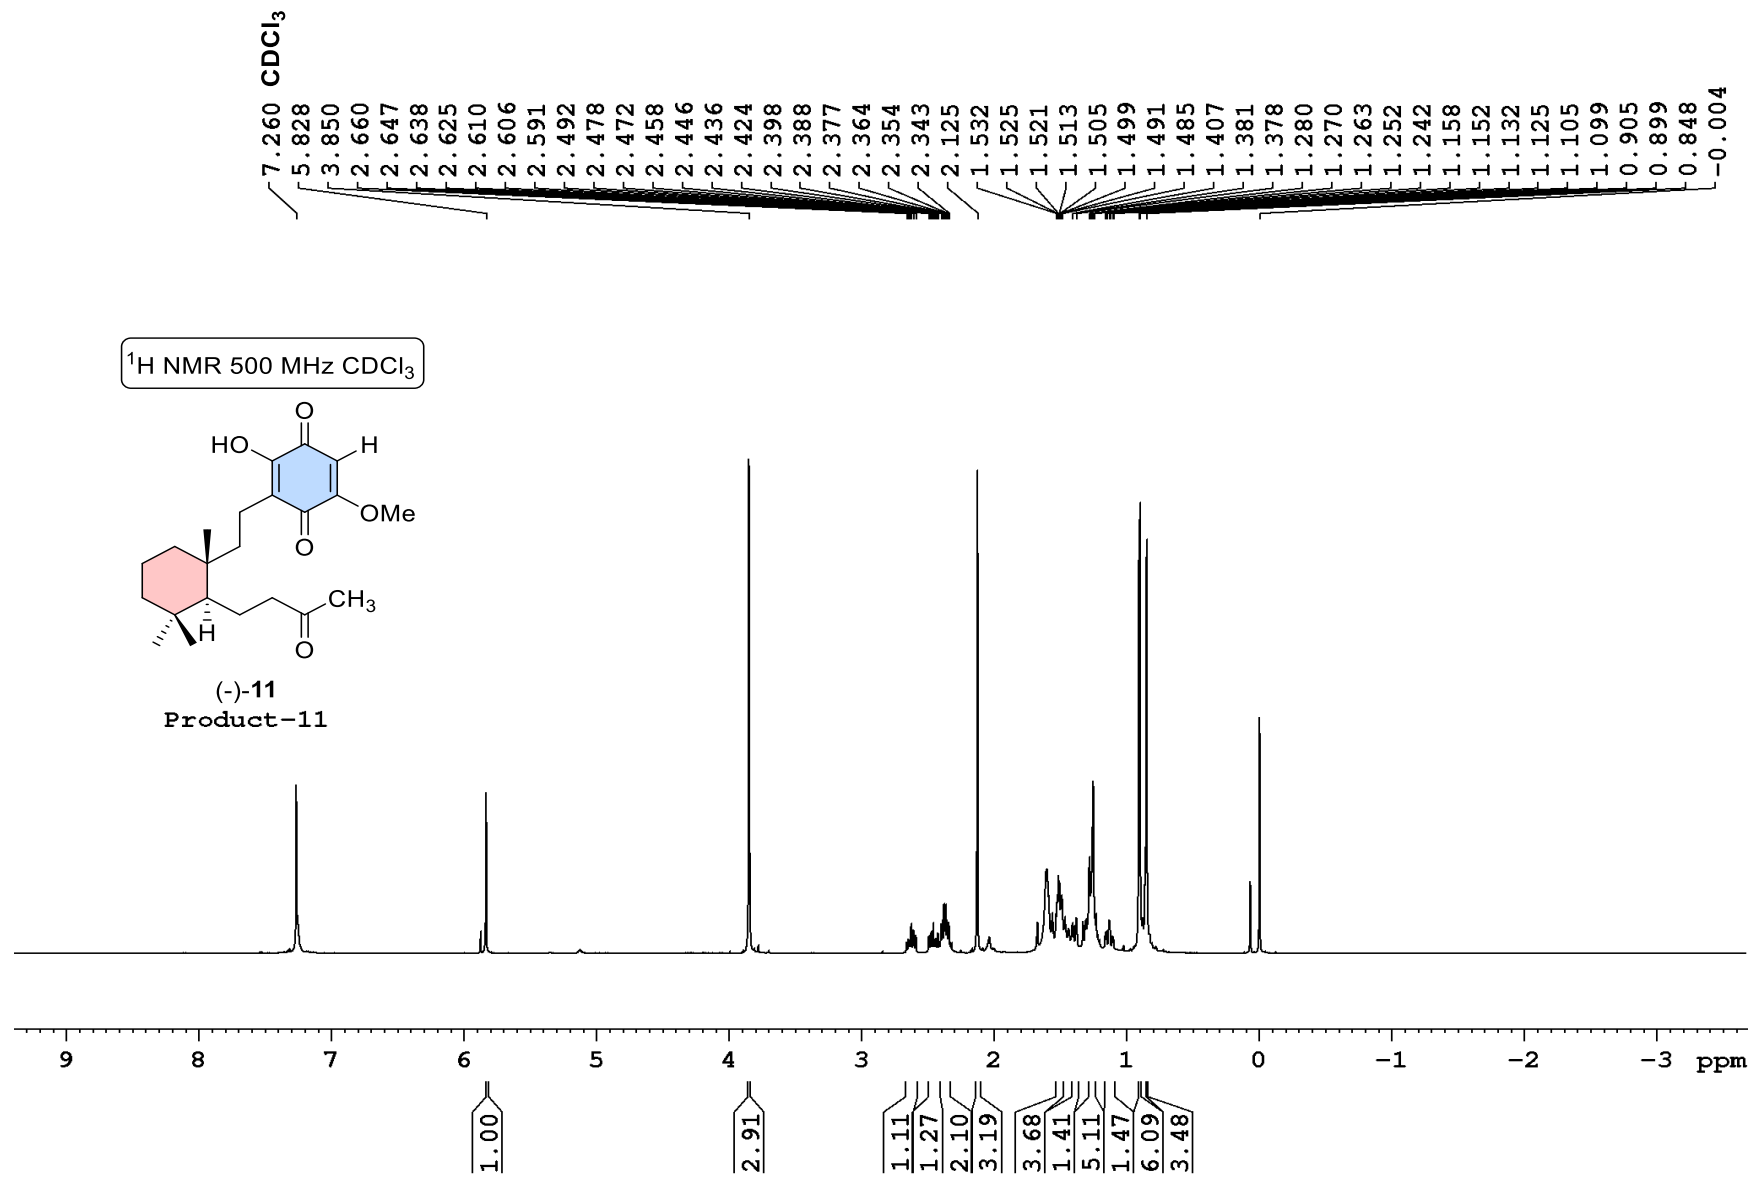

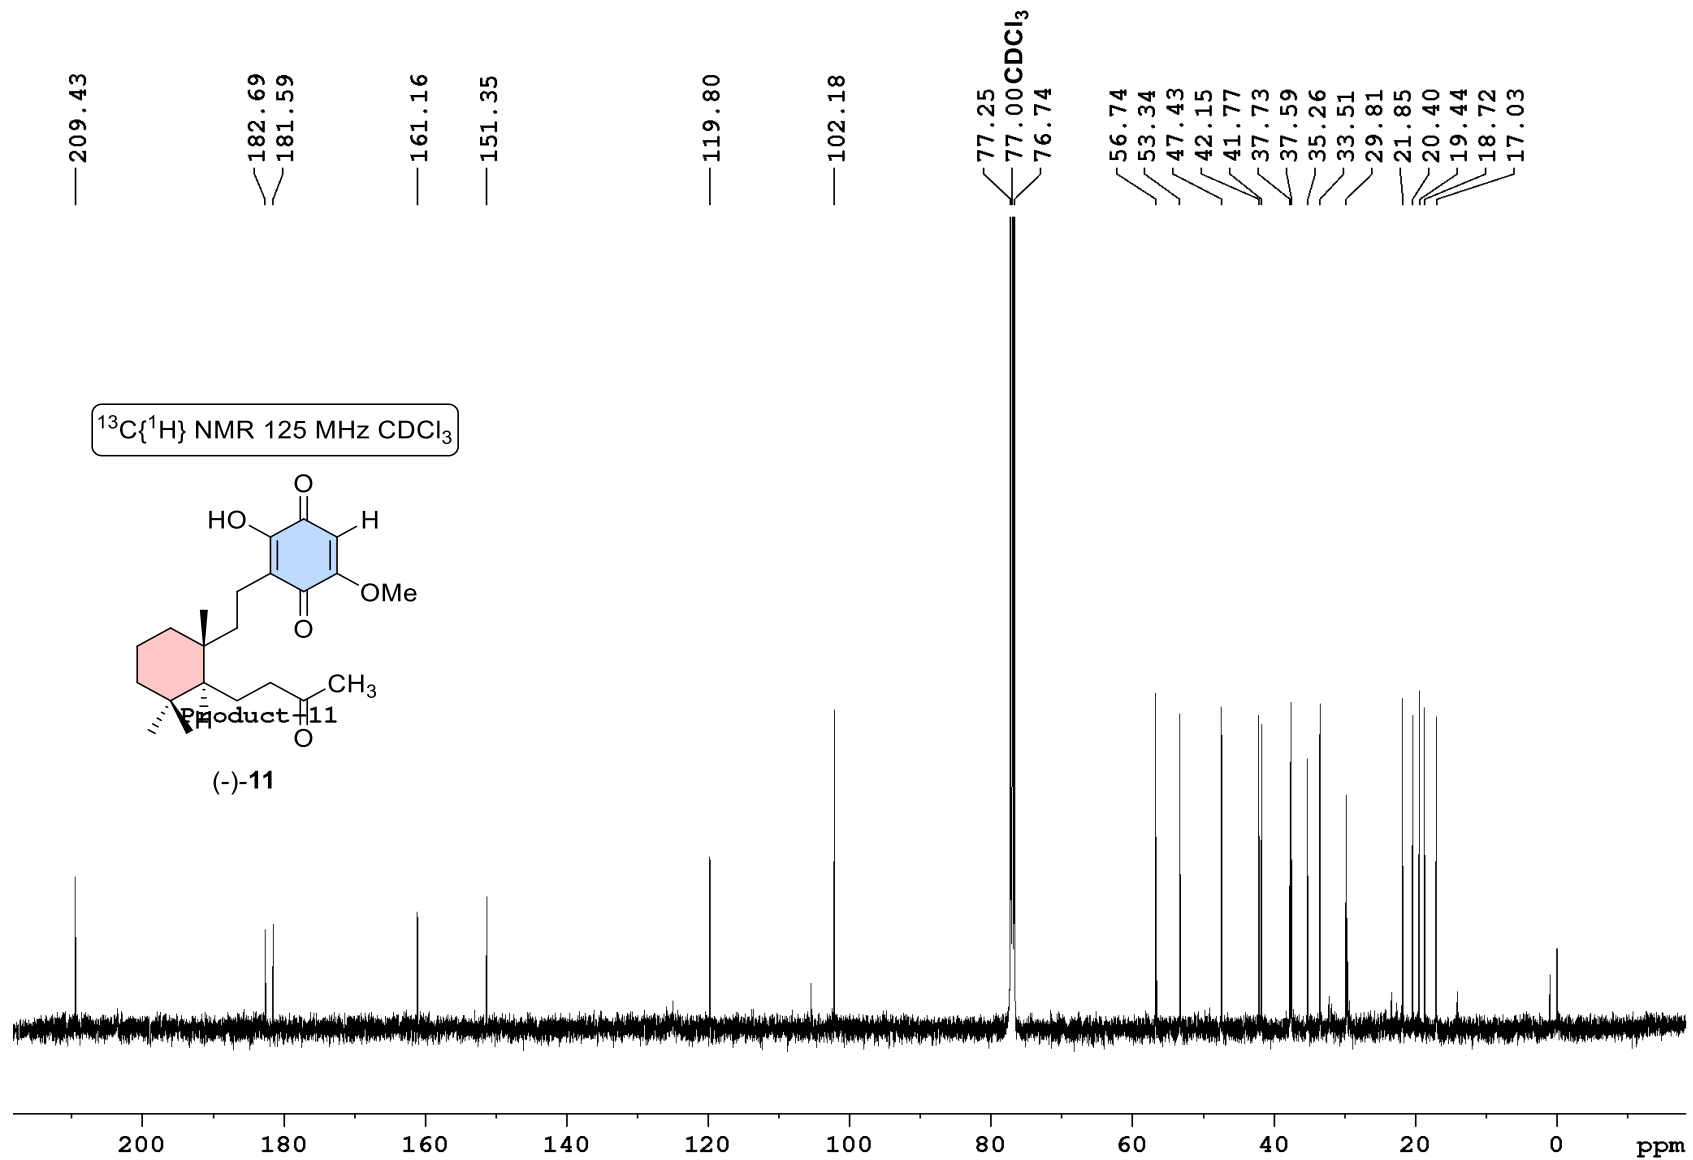

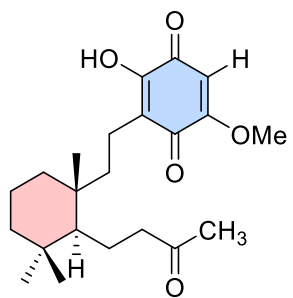

(-)-11  
Product-11

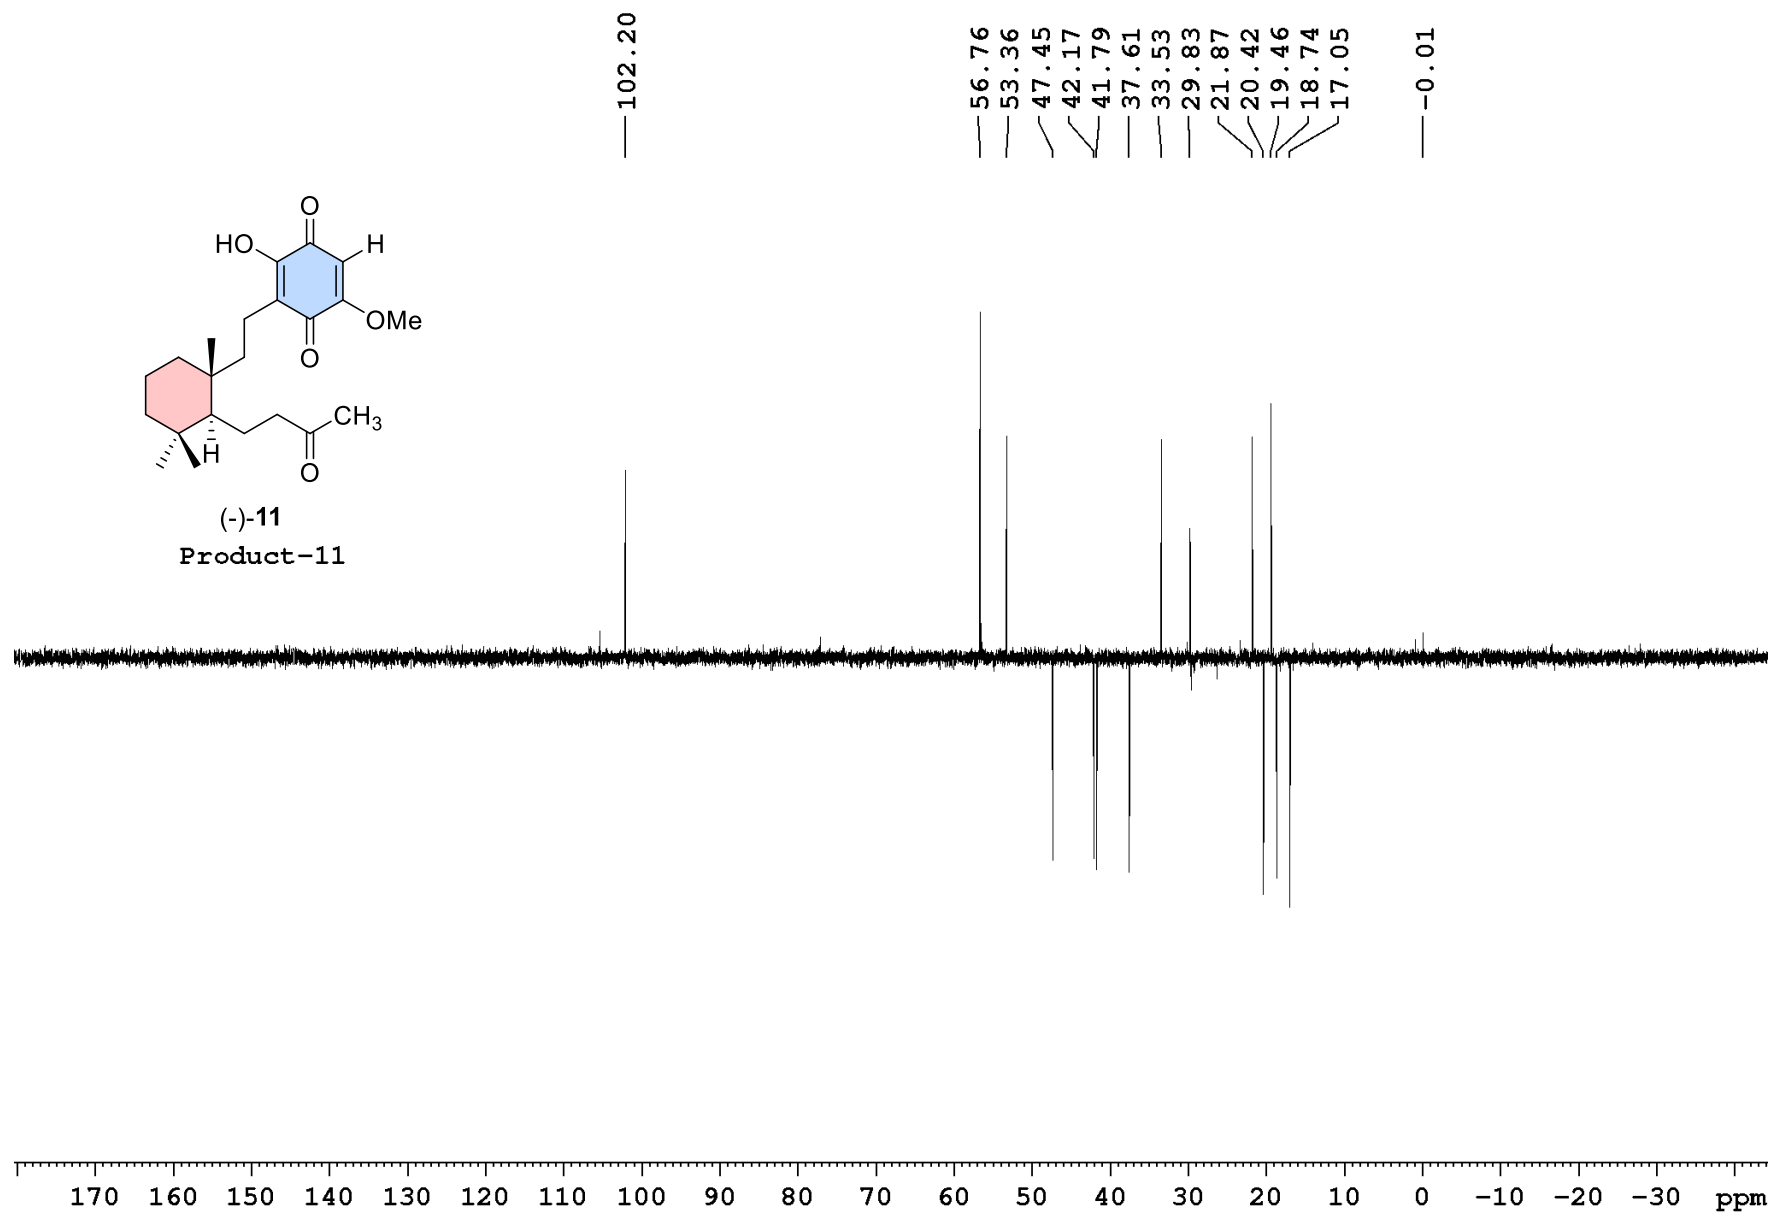

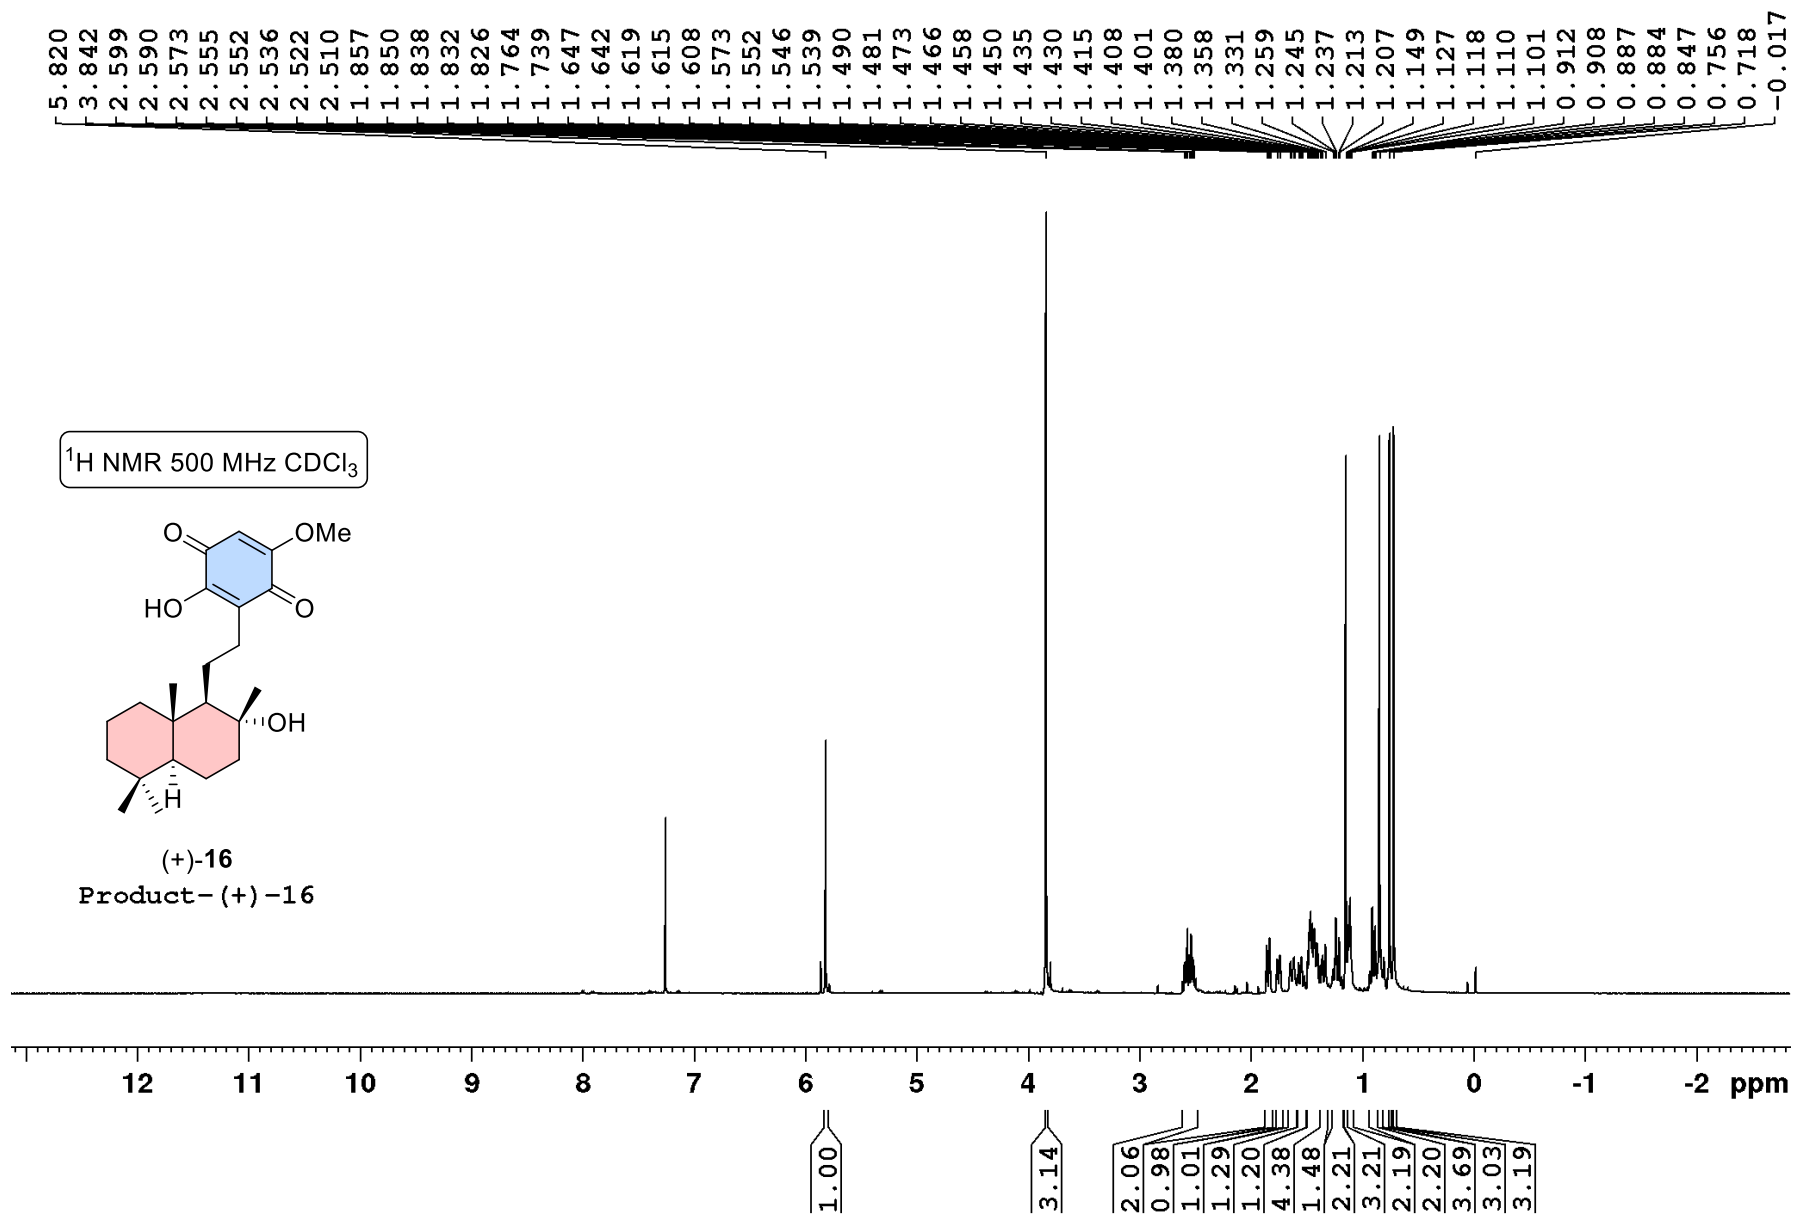

$^{13}\text{C}\{^1\text{H}\}$  NMR 100 MHz  $\text{CDCl}_3$

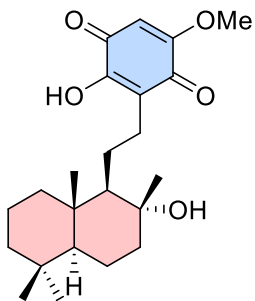

(+)-16

Product- (+) -16

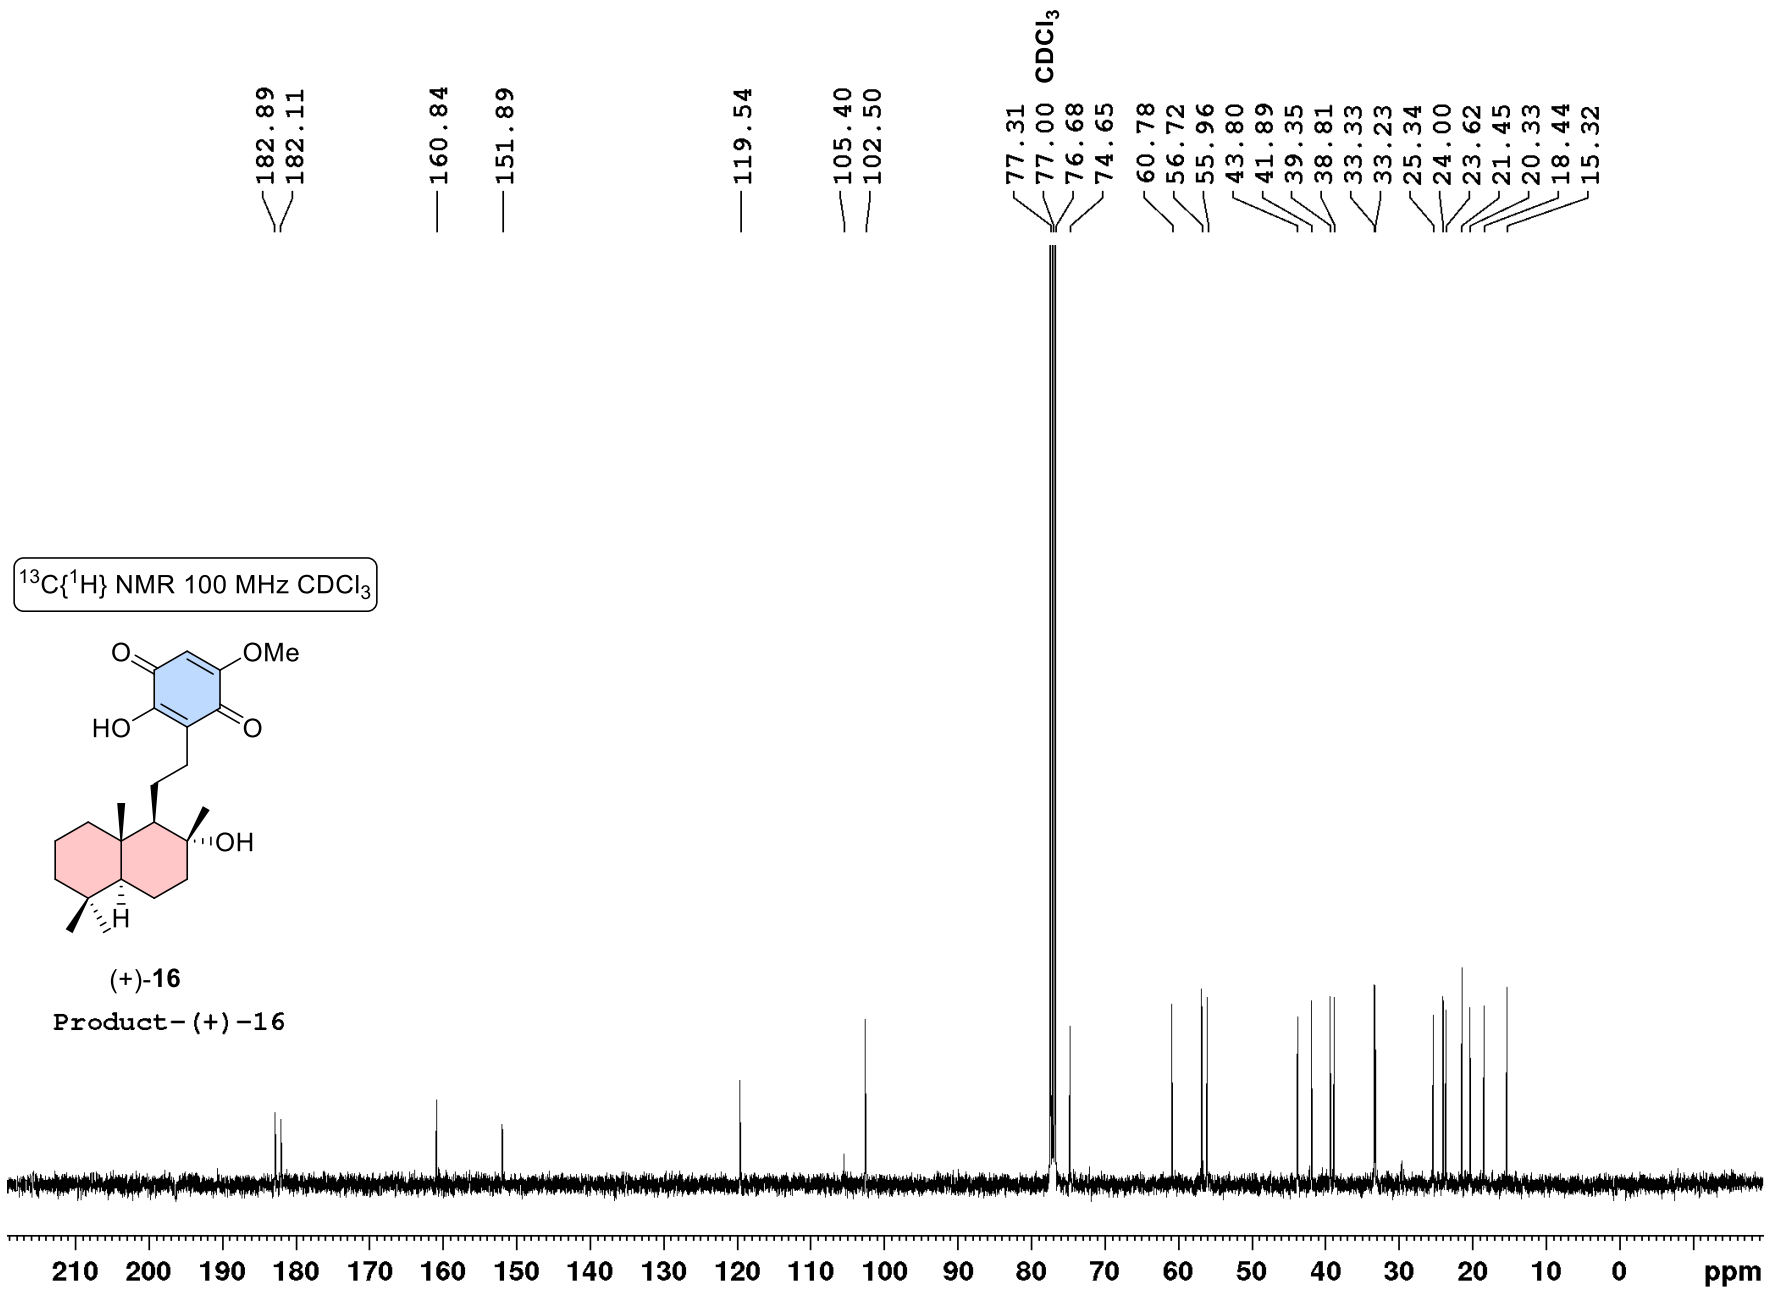

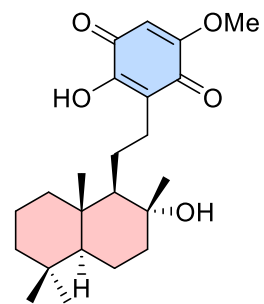

(+)-16  
Product-(+)-16

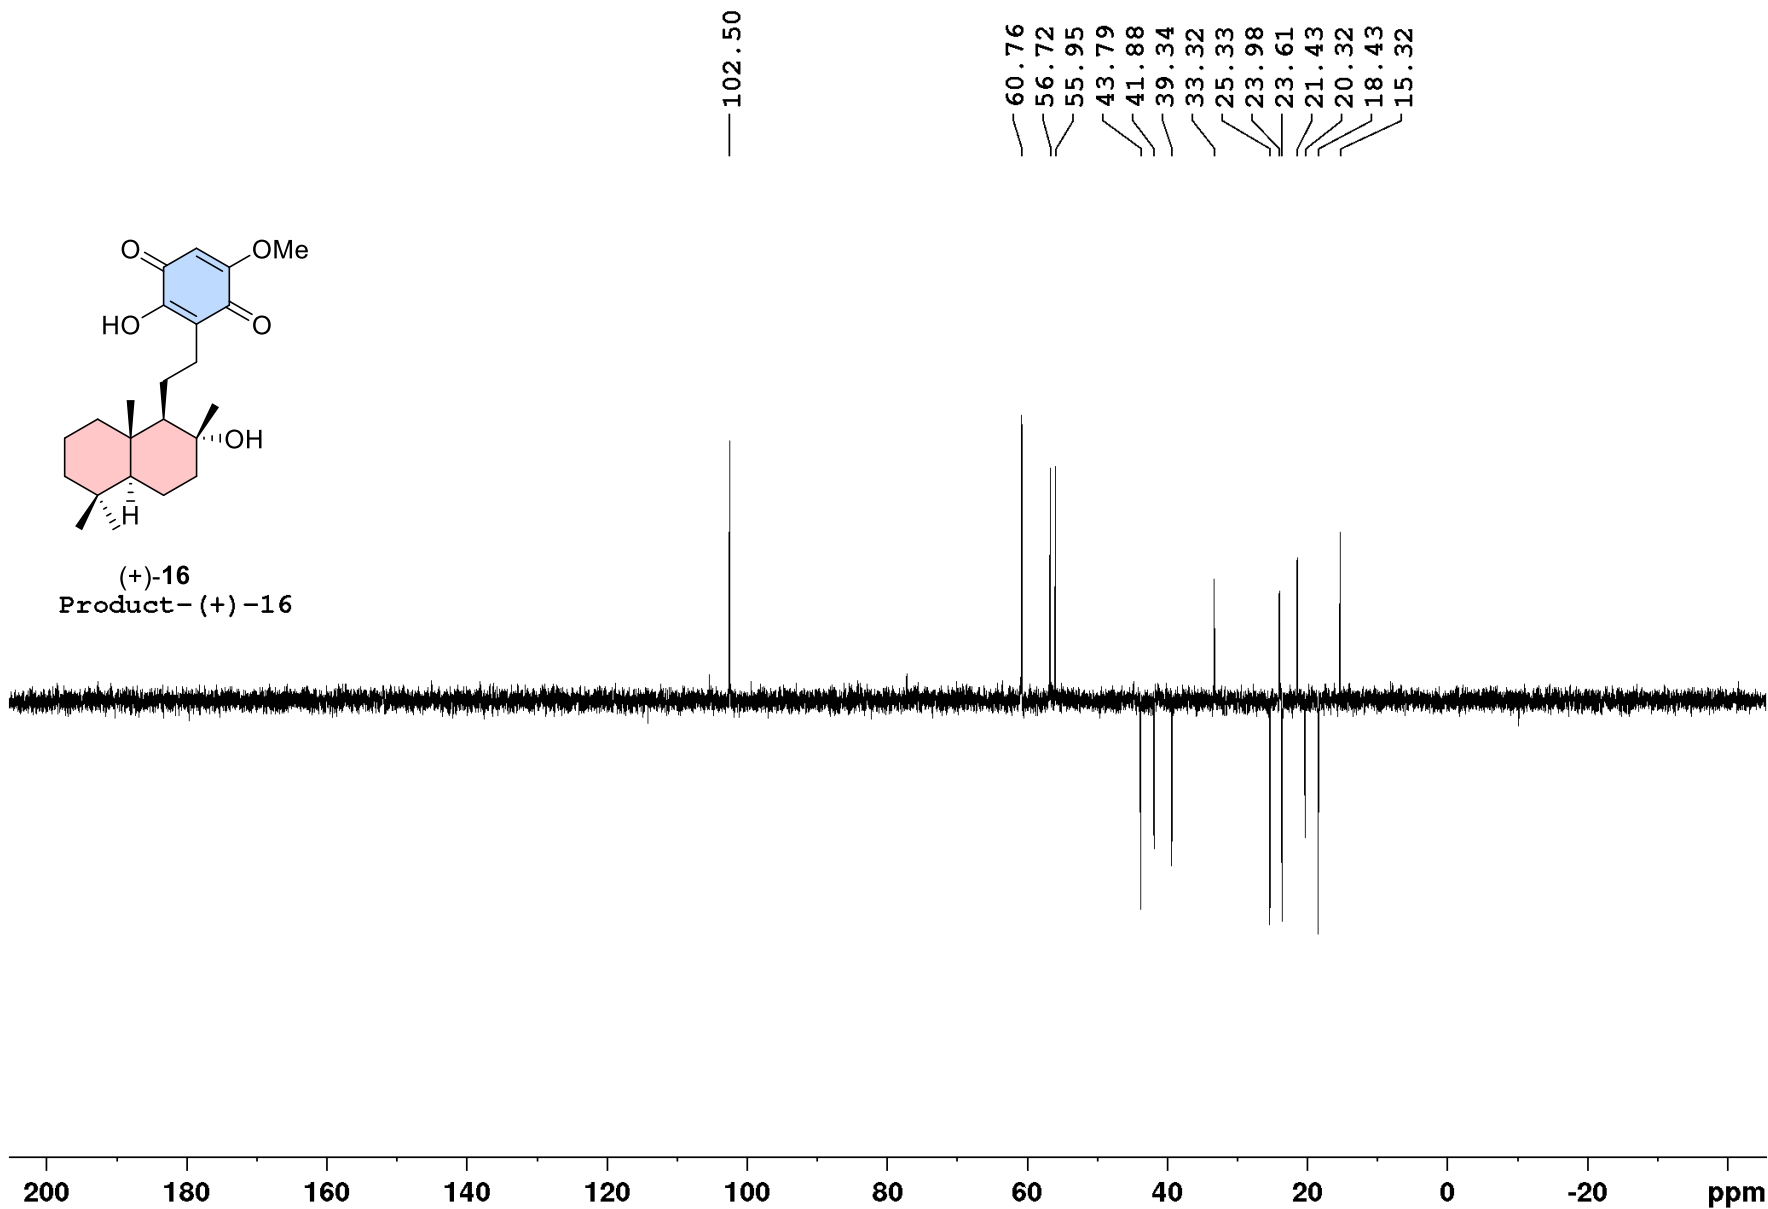

<sup>1</sup>H NMR 500 MHz CDCl<sub>3</sub>

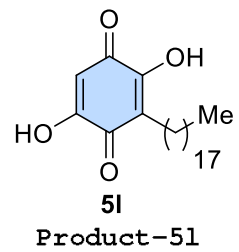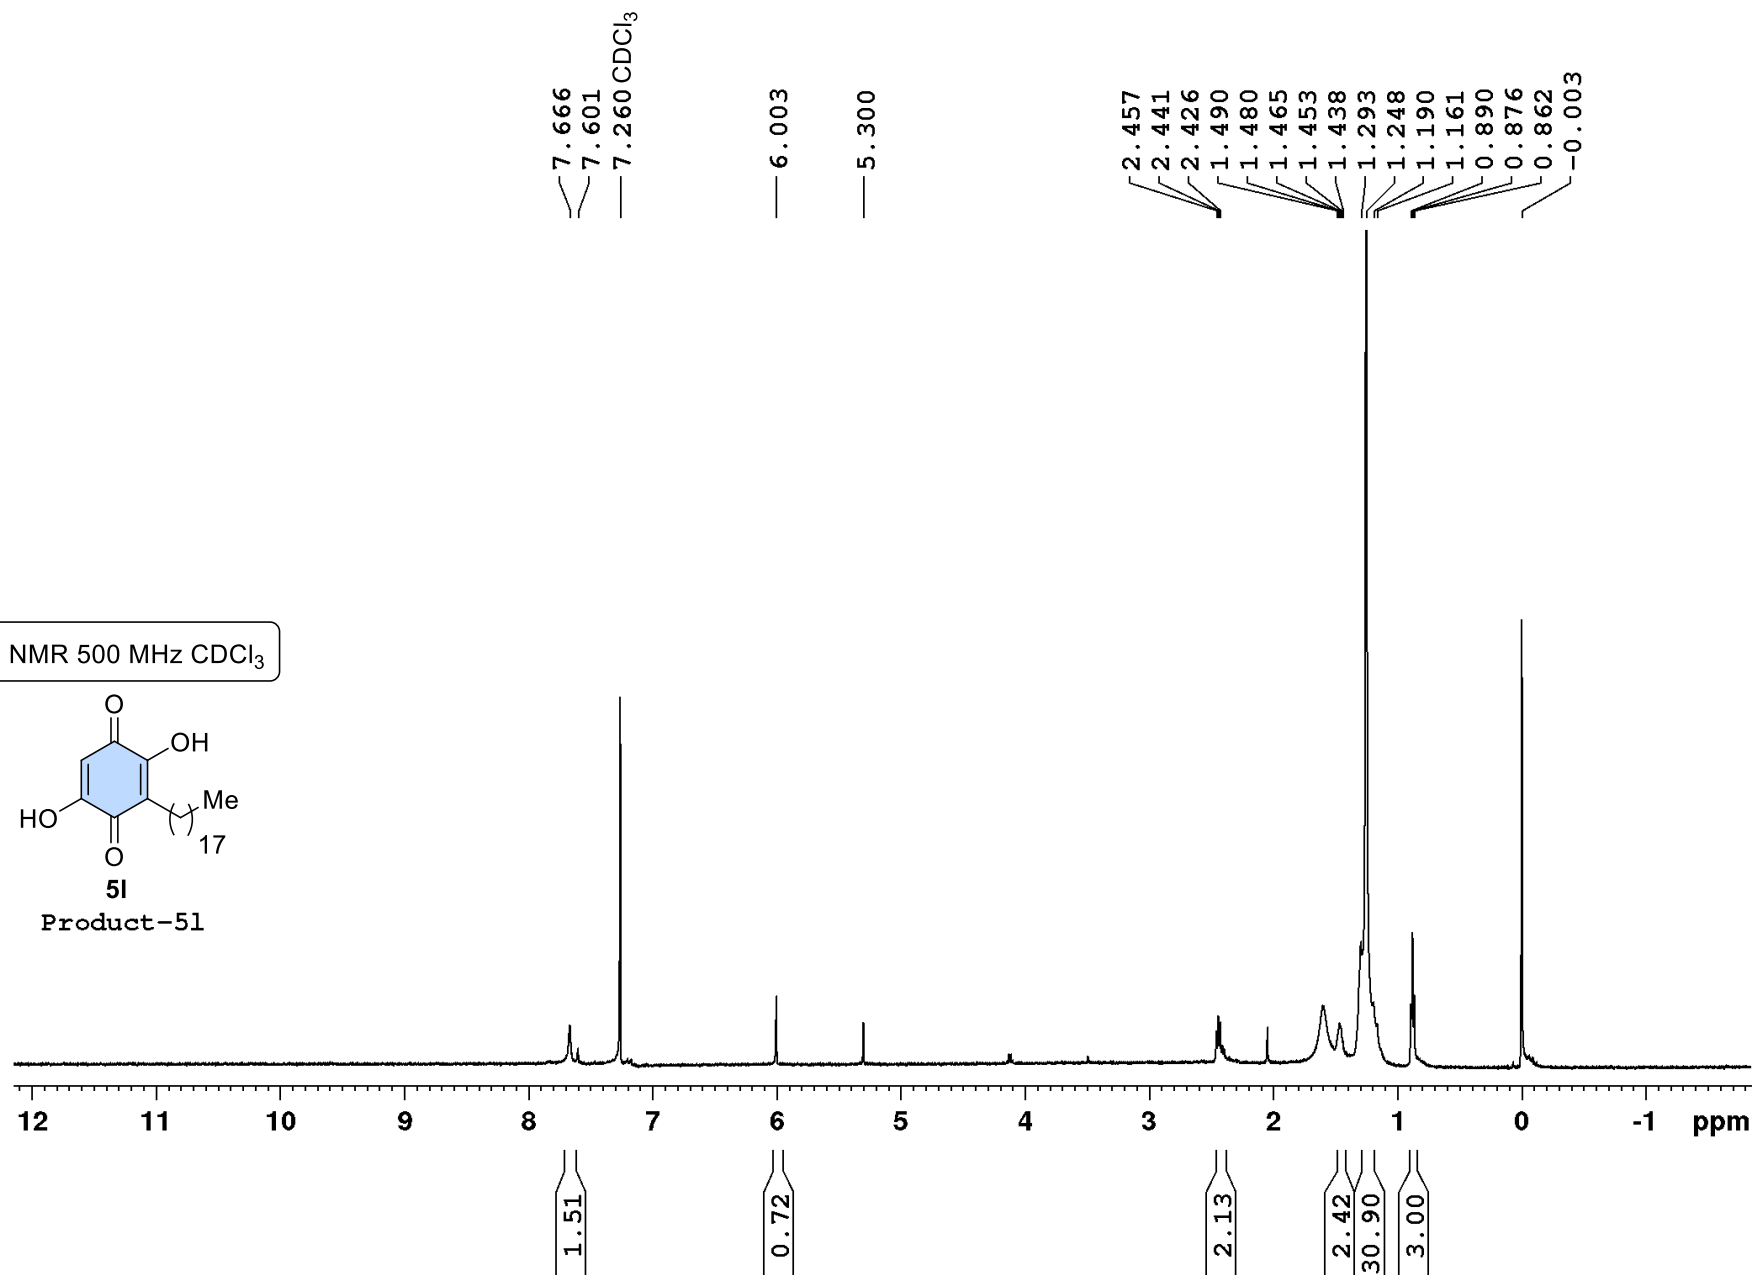

$^1\text{H}$  NMR 500 MHz  $\text{CDCl}_3 + \text{CD}_3\text{OD}$

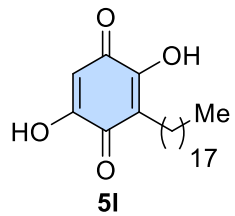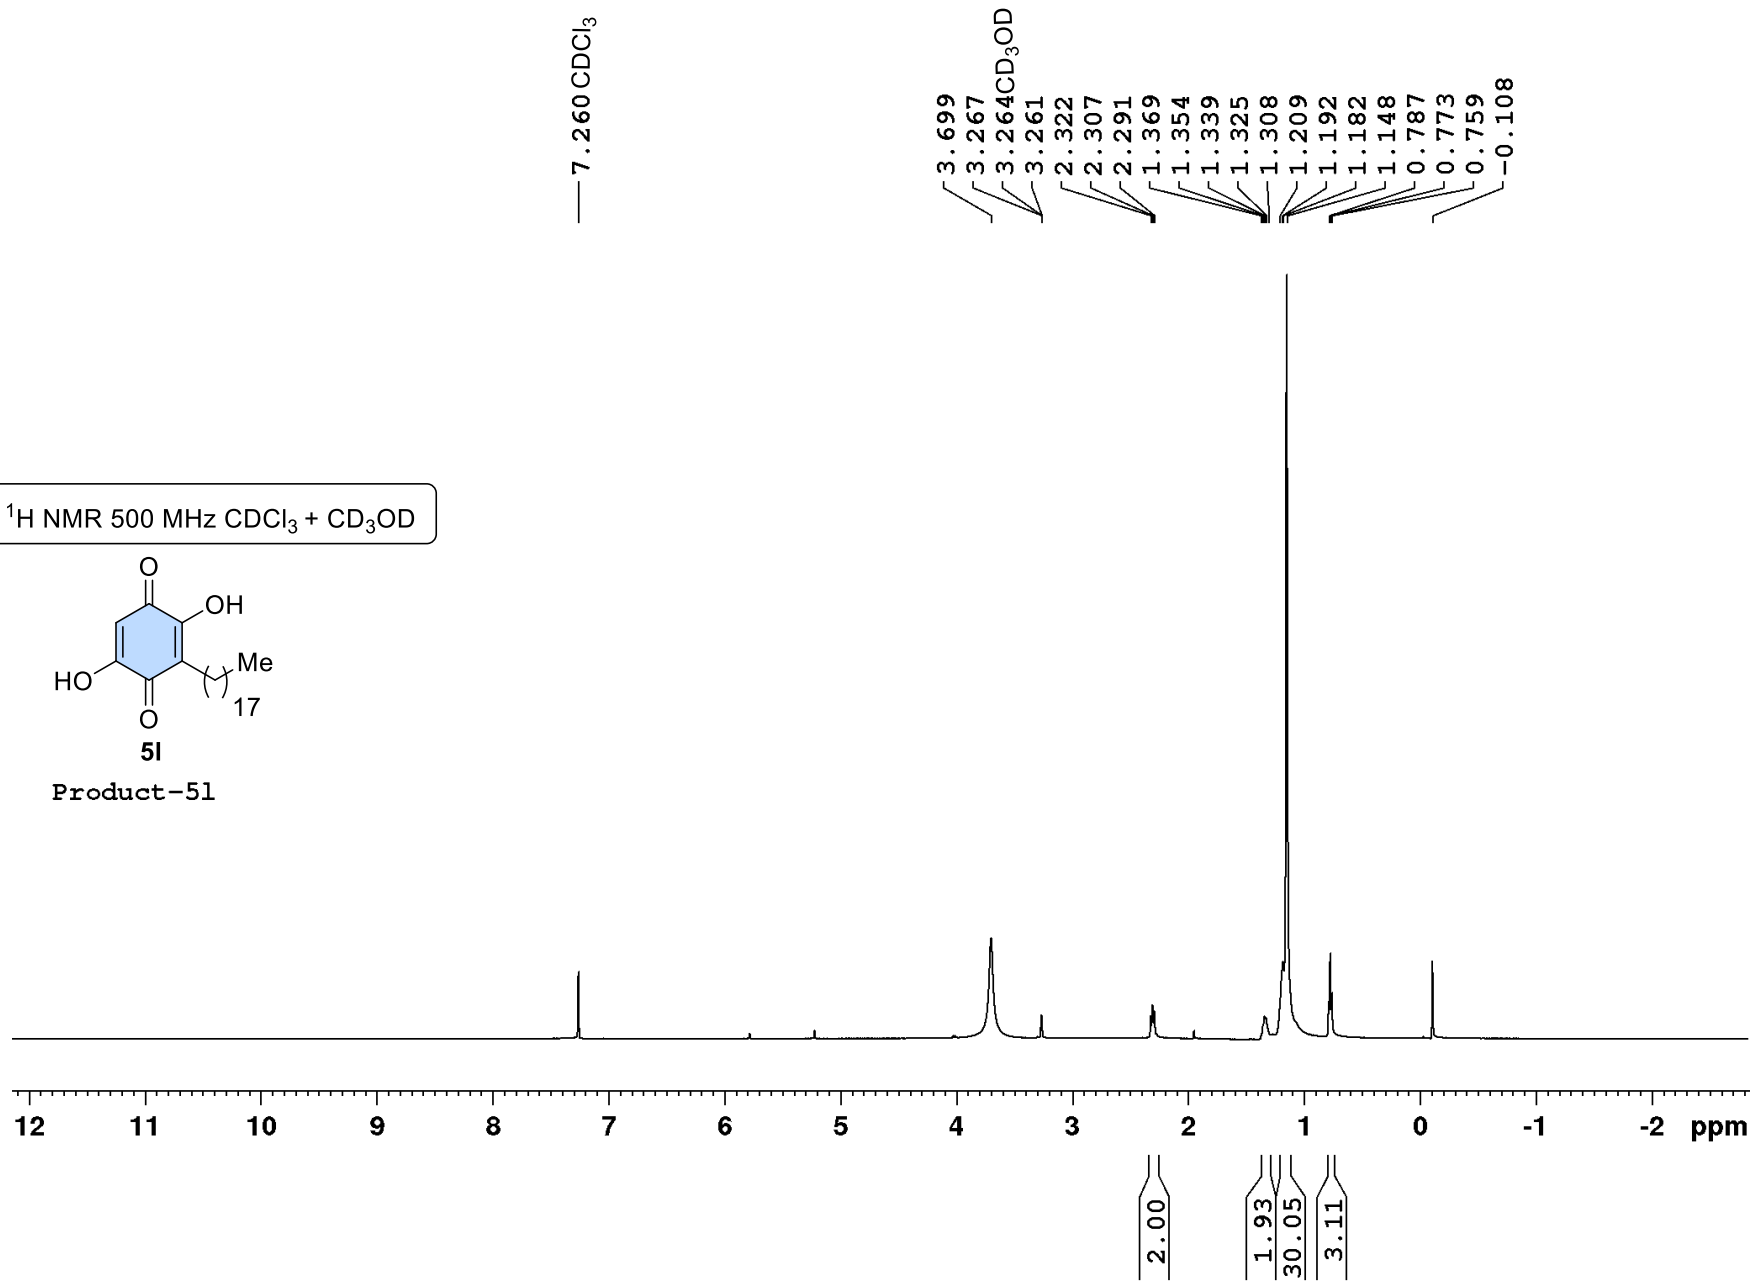



$^{13}\text{C} \{^1\text{H}\}$  NMR 125 MHz  $\text{CDCl}_3 + \text{CD}_3\text{OD}$

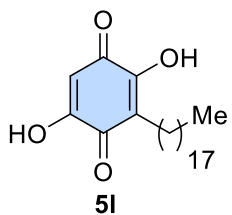

Product-51

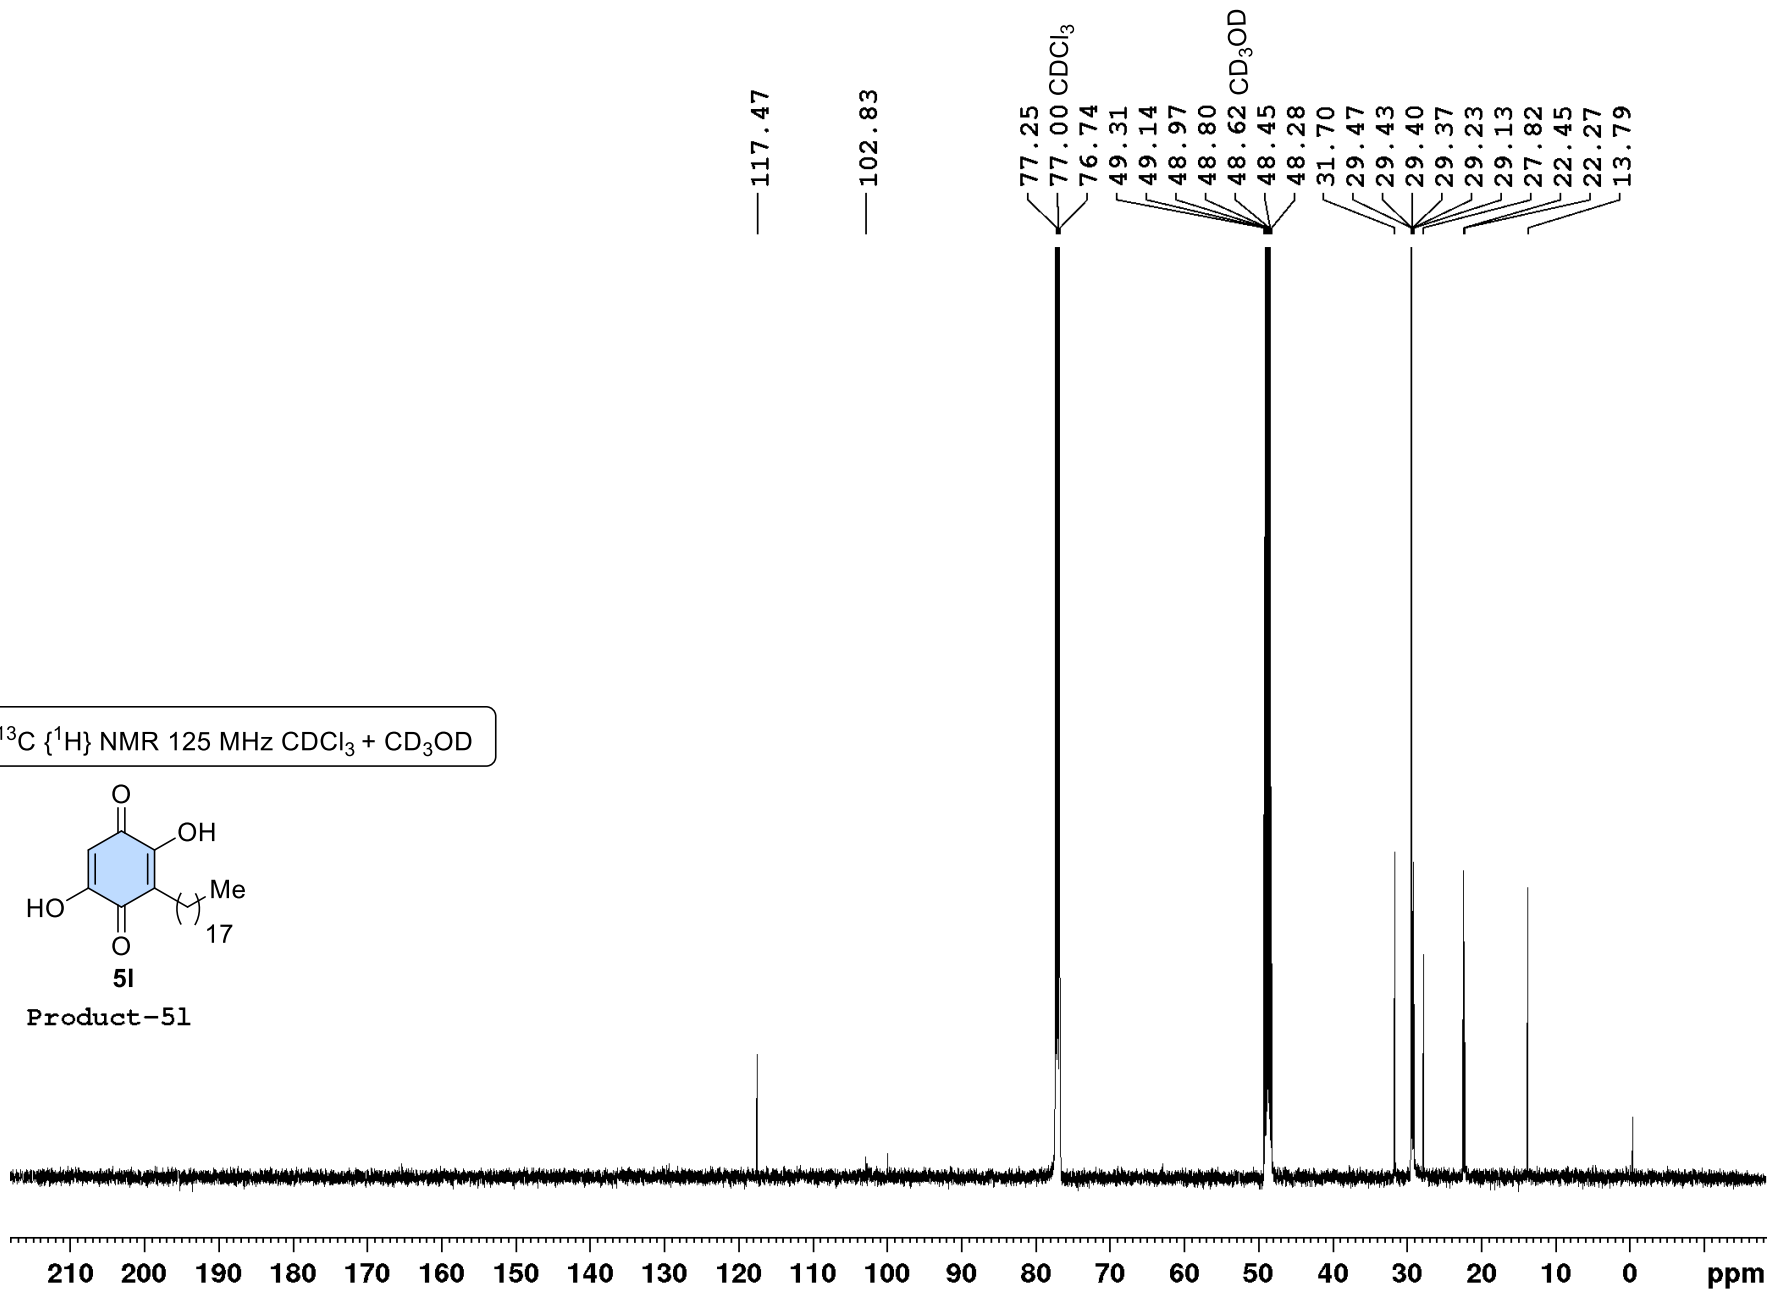

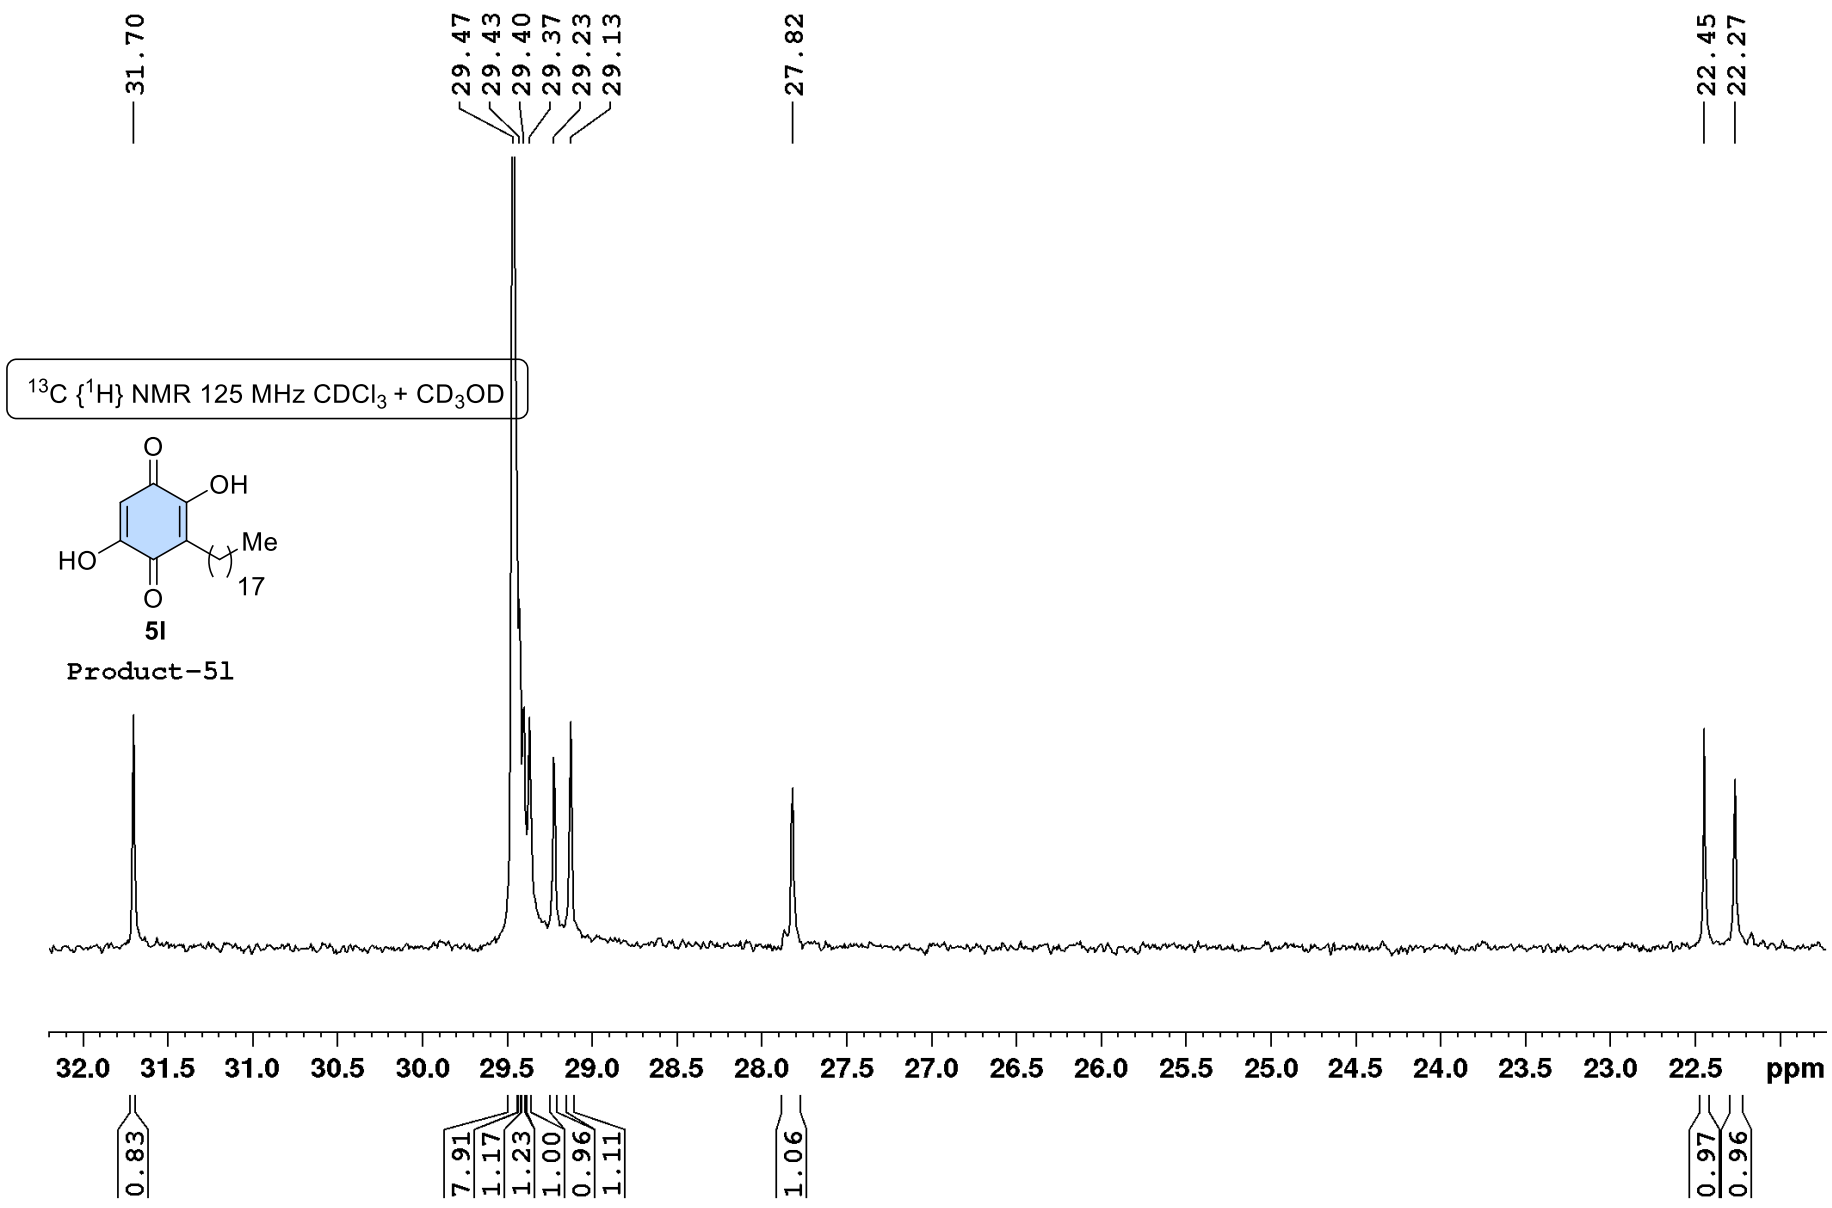

DEPT-135 125 MHz CDCl<sub>3</sub> + CD<sub>3</sub>OD

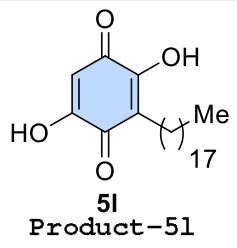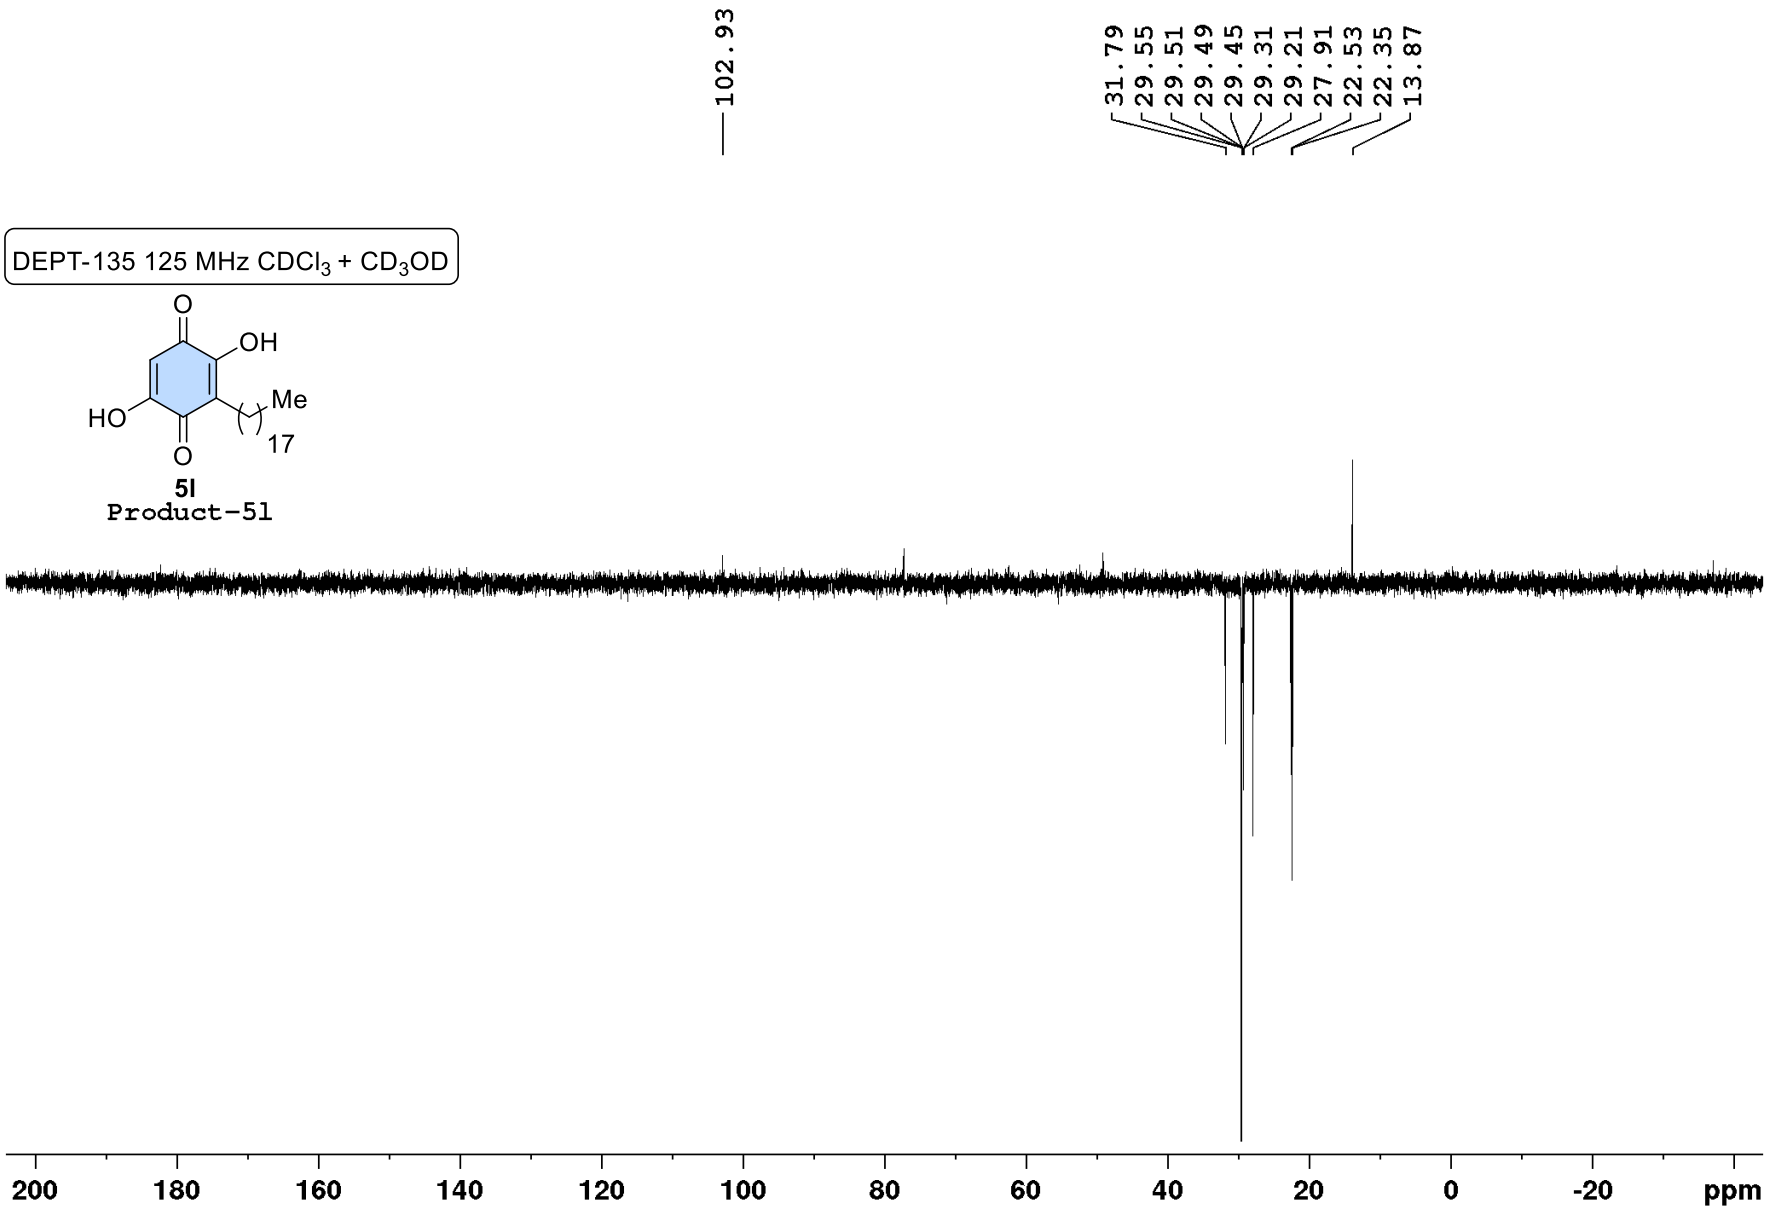

<sup>1</sup>H NMR 500 MHz CDCl<sub>3</sub>

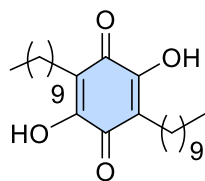

6a  
Product-6a

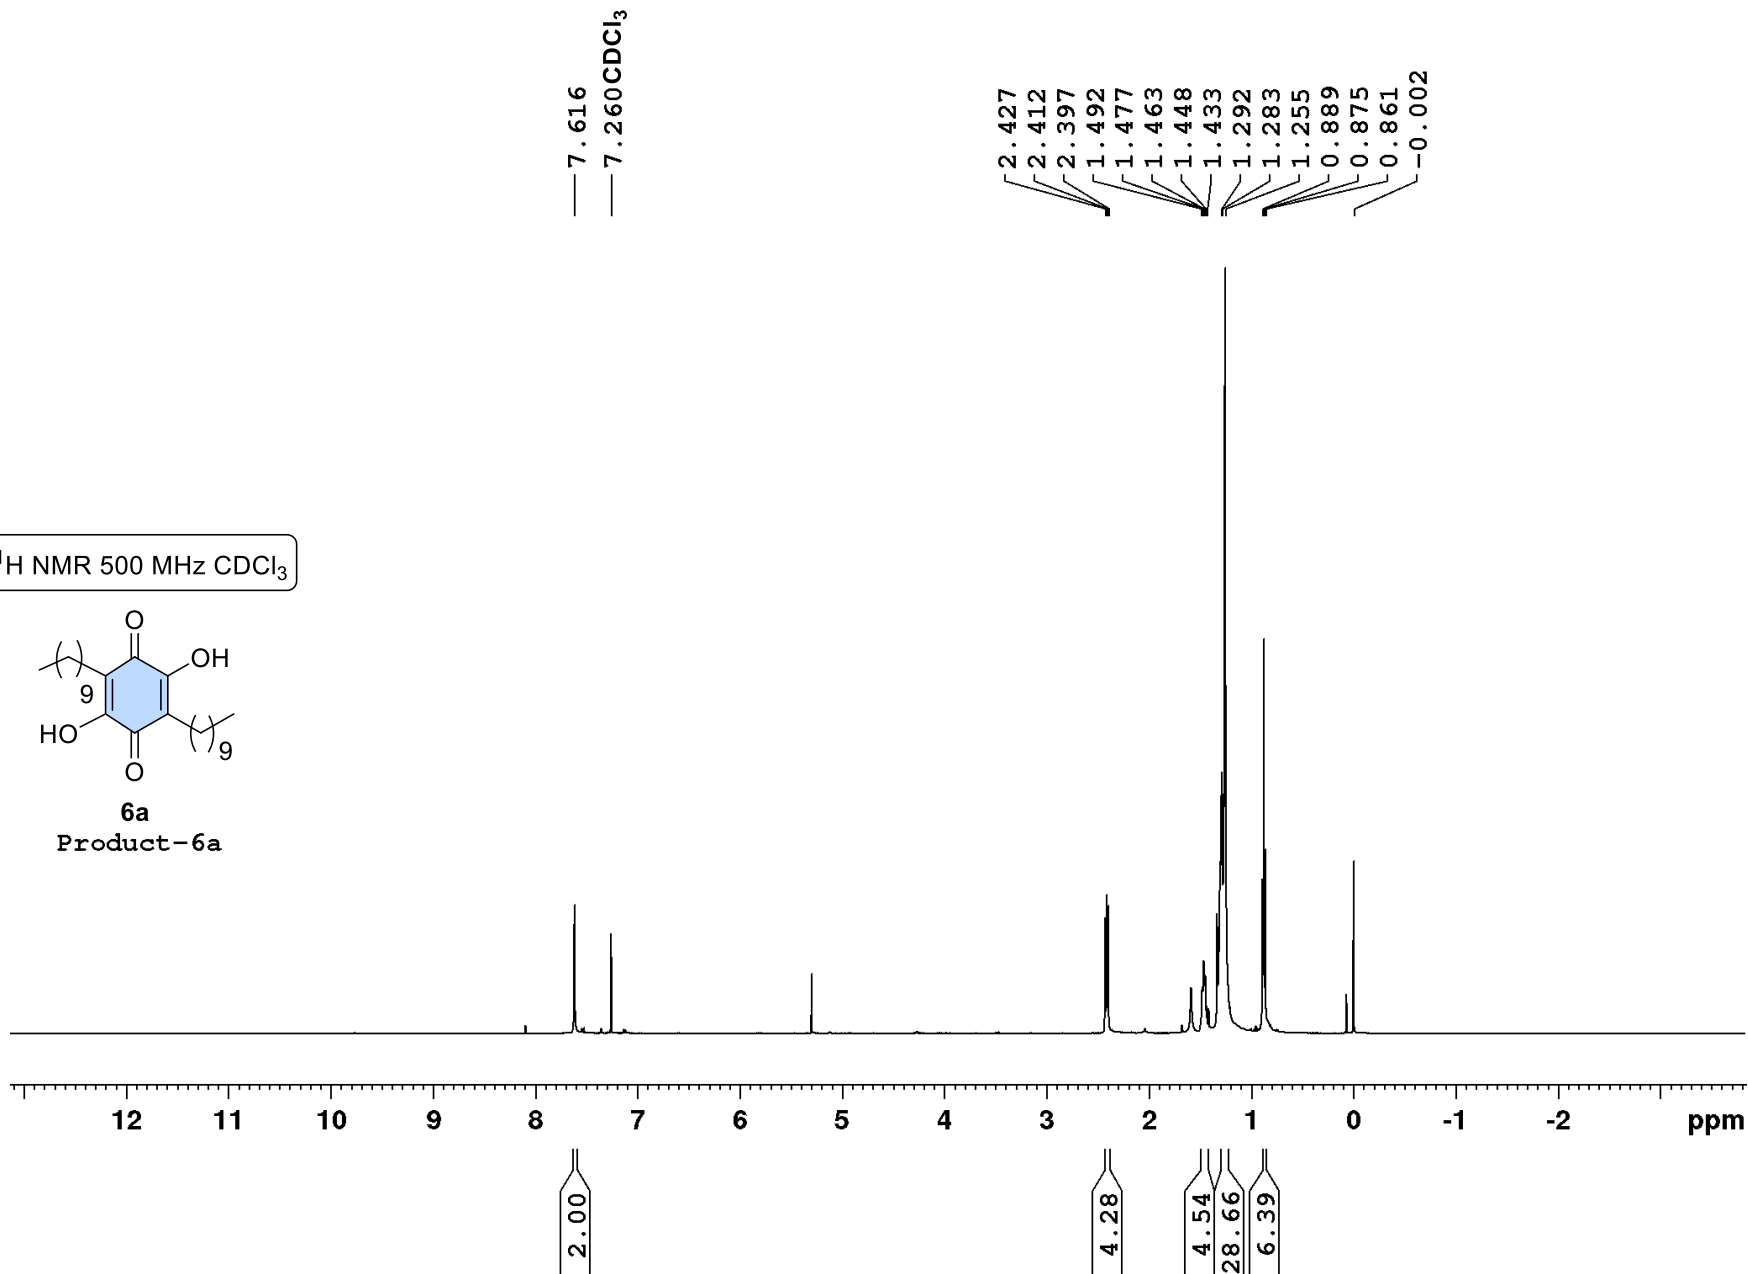

$^{13}\text{C}\{^1\text{H}\}$  NMR 125 MHz  $\text{CDCl}_3$

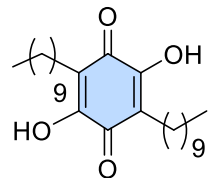

**6a**

Product-6a

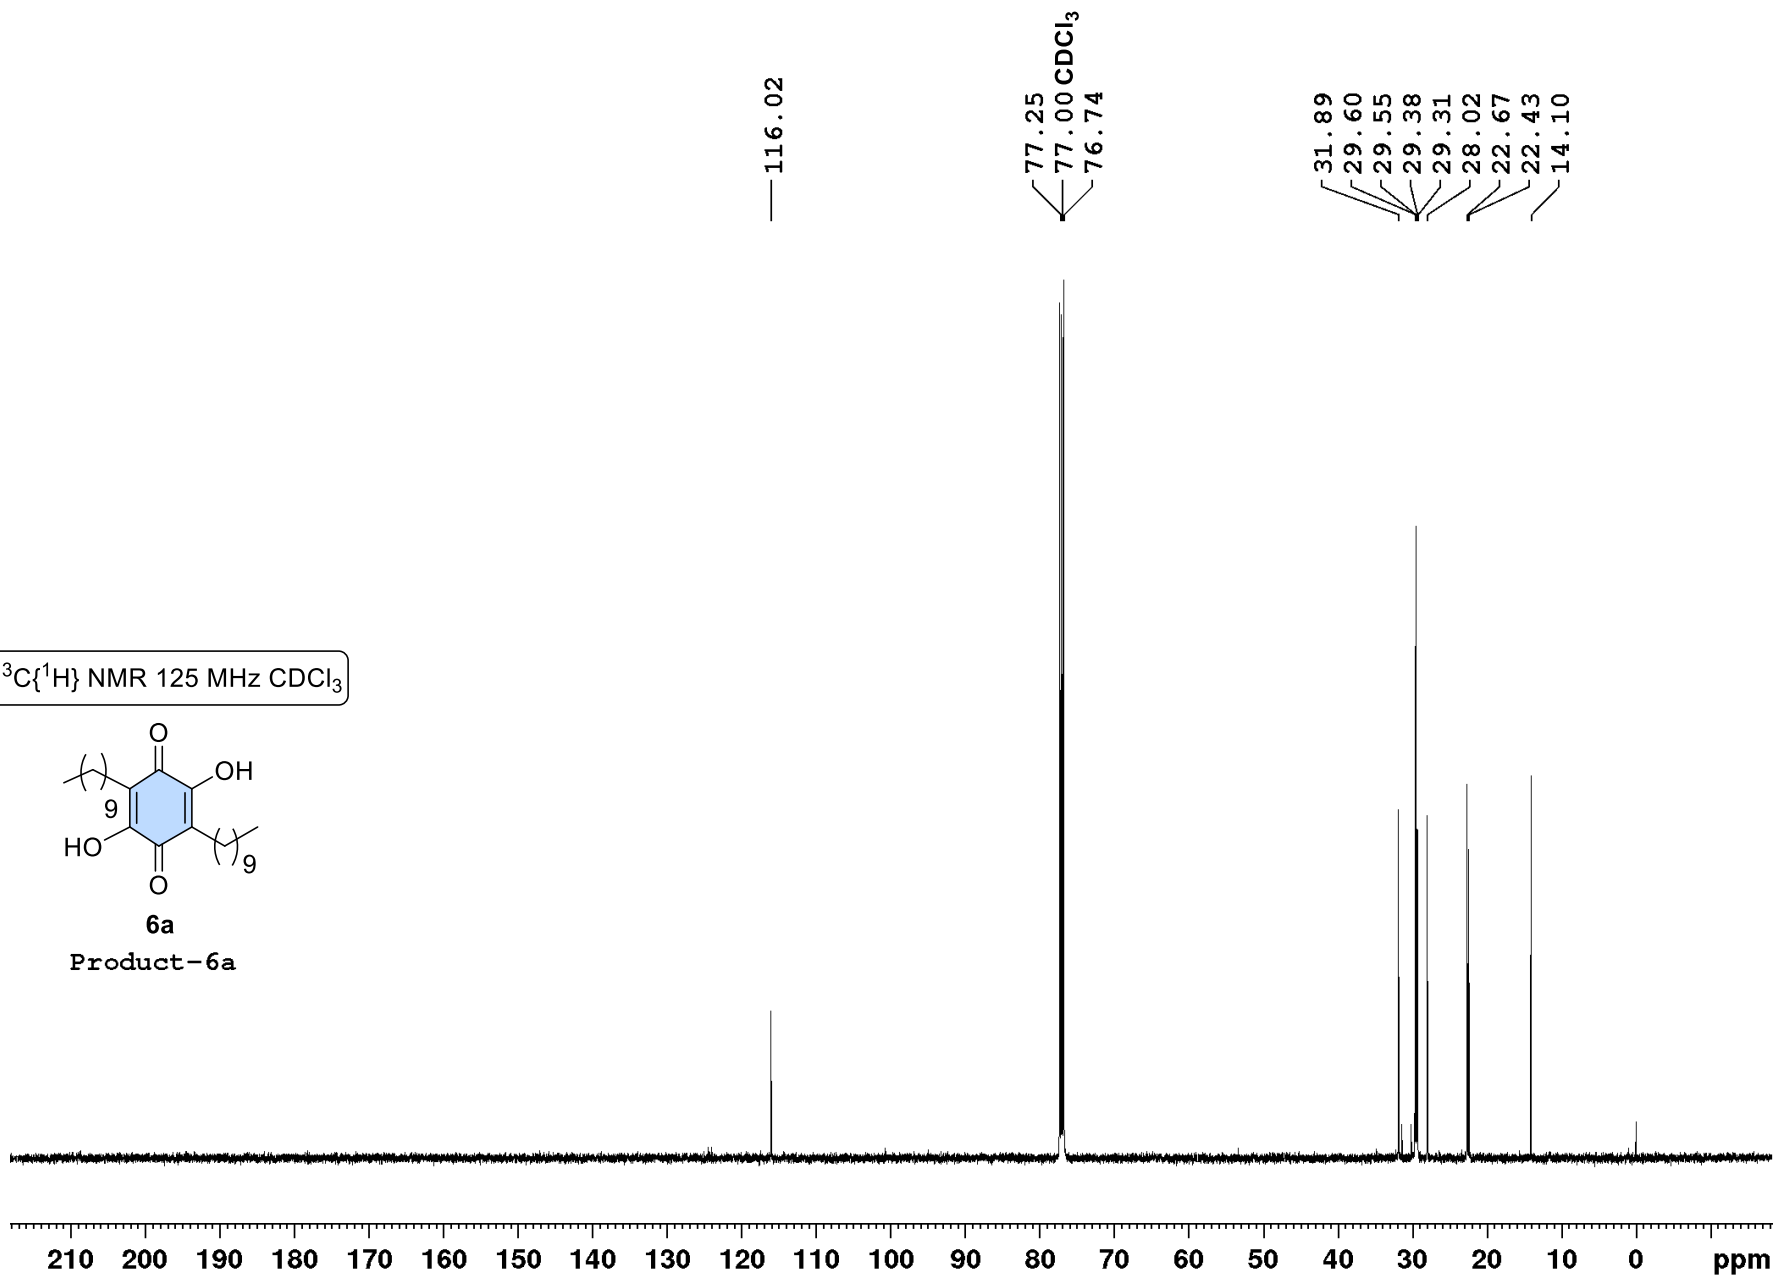

DEPT-135 125 MHz CDCl<sub>3</sub>

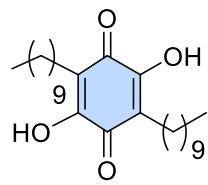

**6a**  
Product-6a

31.89  
29.60  
29.55  
29.38  
29.31  
28.02  
22.67  
22.43  
14.10

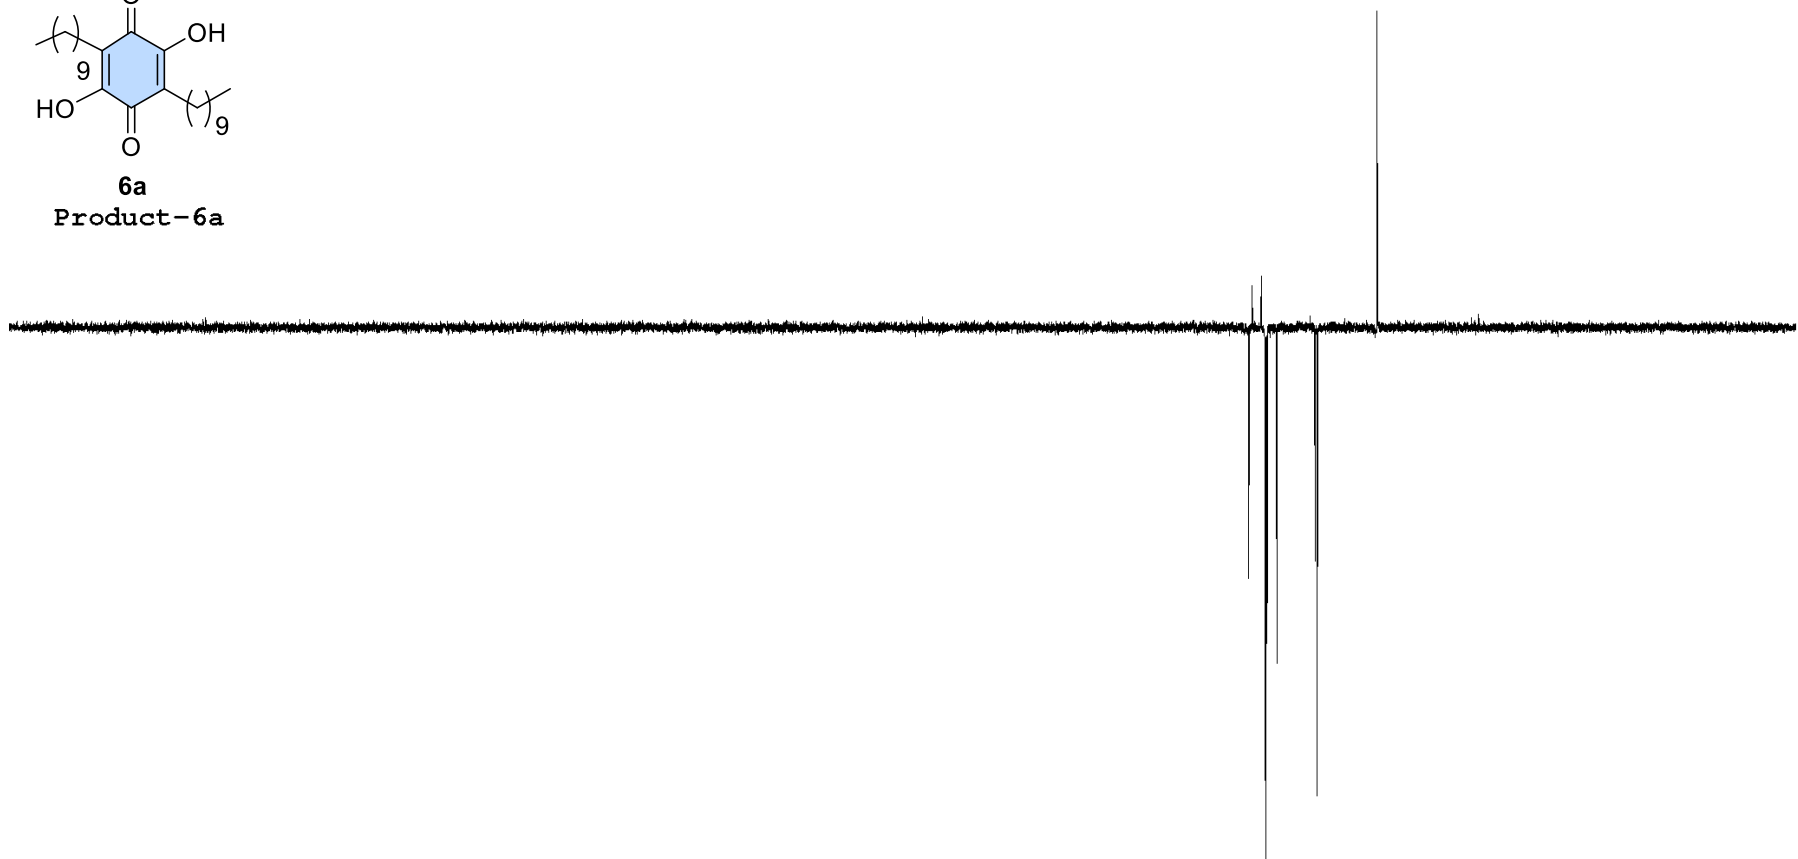

200 180 160 140 120 100 80 60 40 20 0 -20 ppm

<sup>1</sup>H NMR 500 MHz CDCl<sub>3</sub>

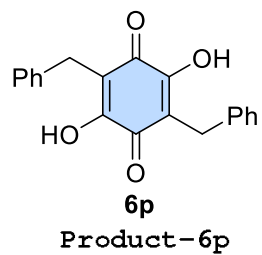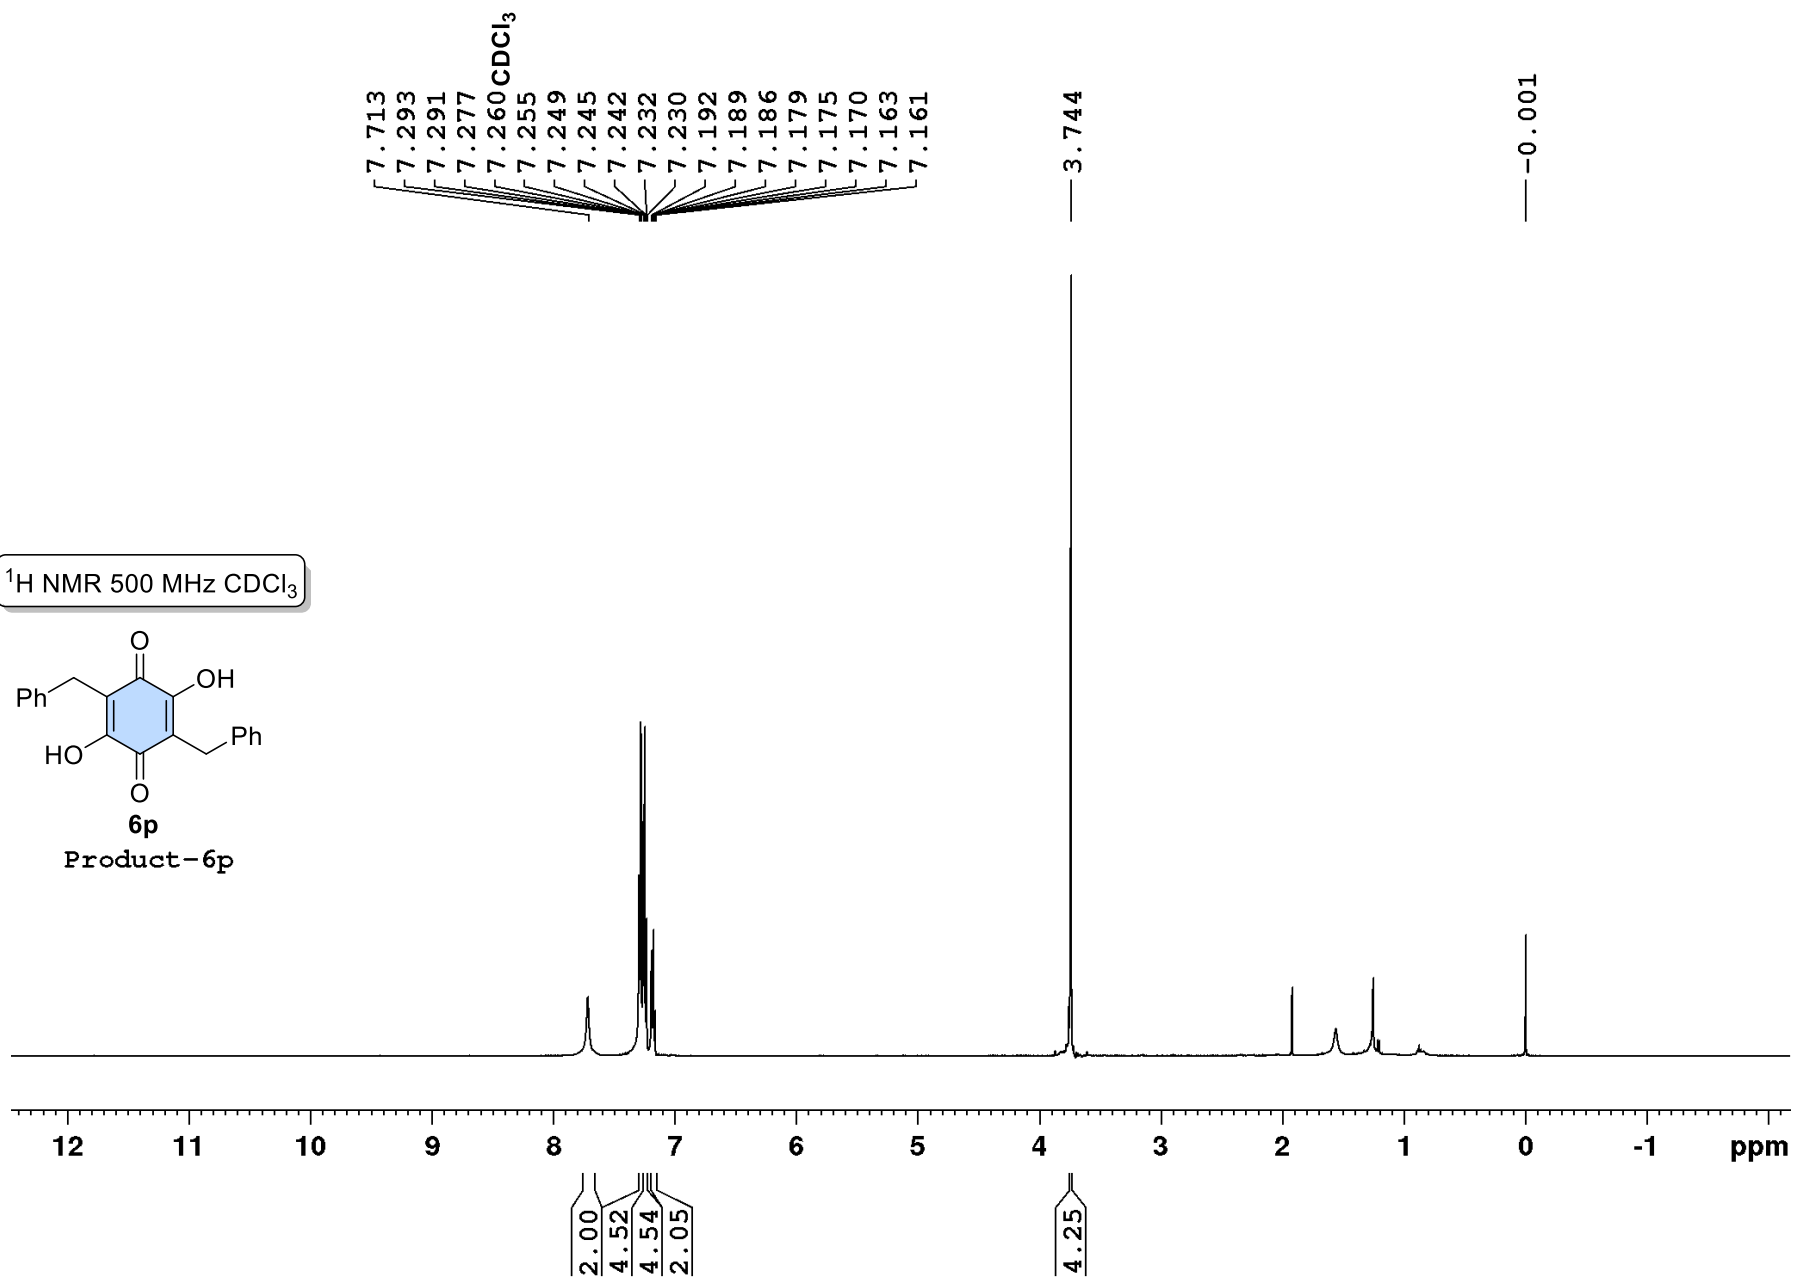

$^{13}\text{C}$   $\{^1\text{H}\}$  NMR 125 MHz  $\text{CDCl}_3$

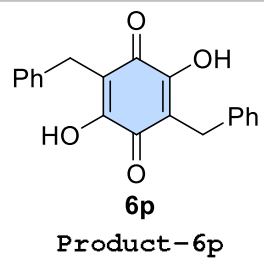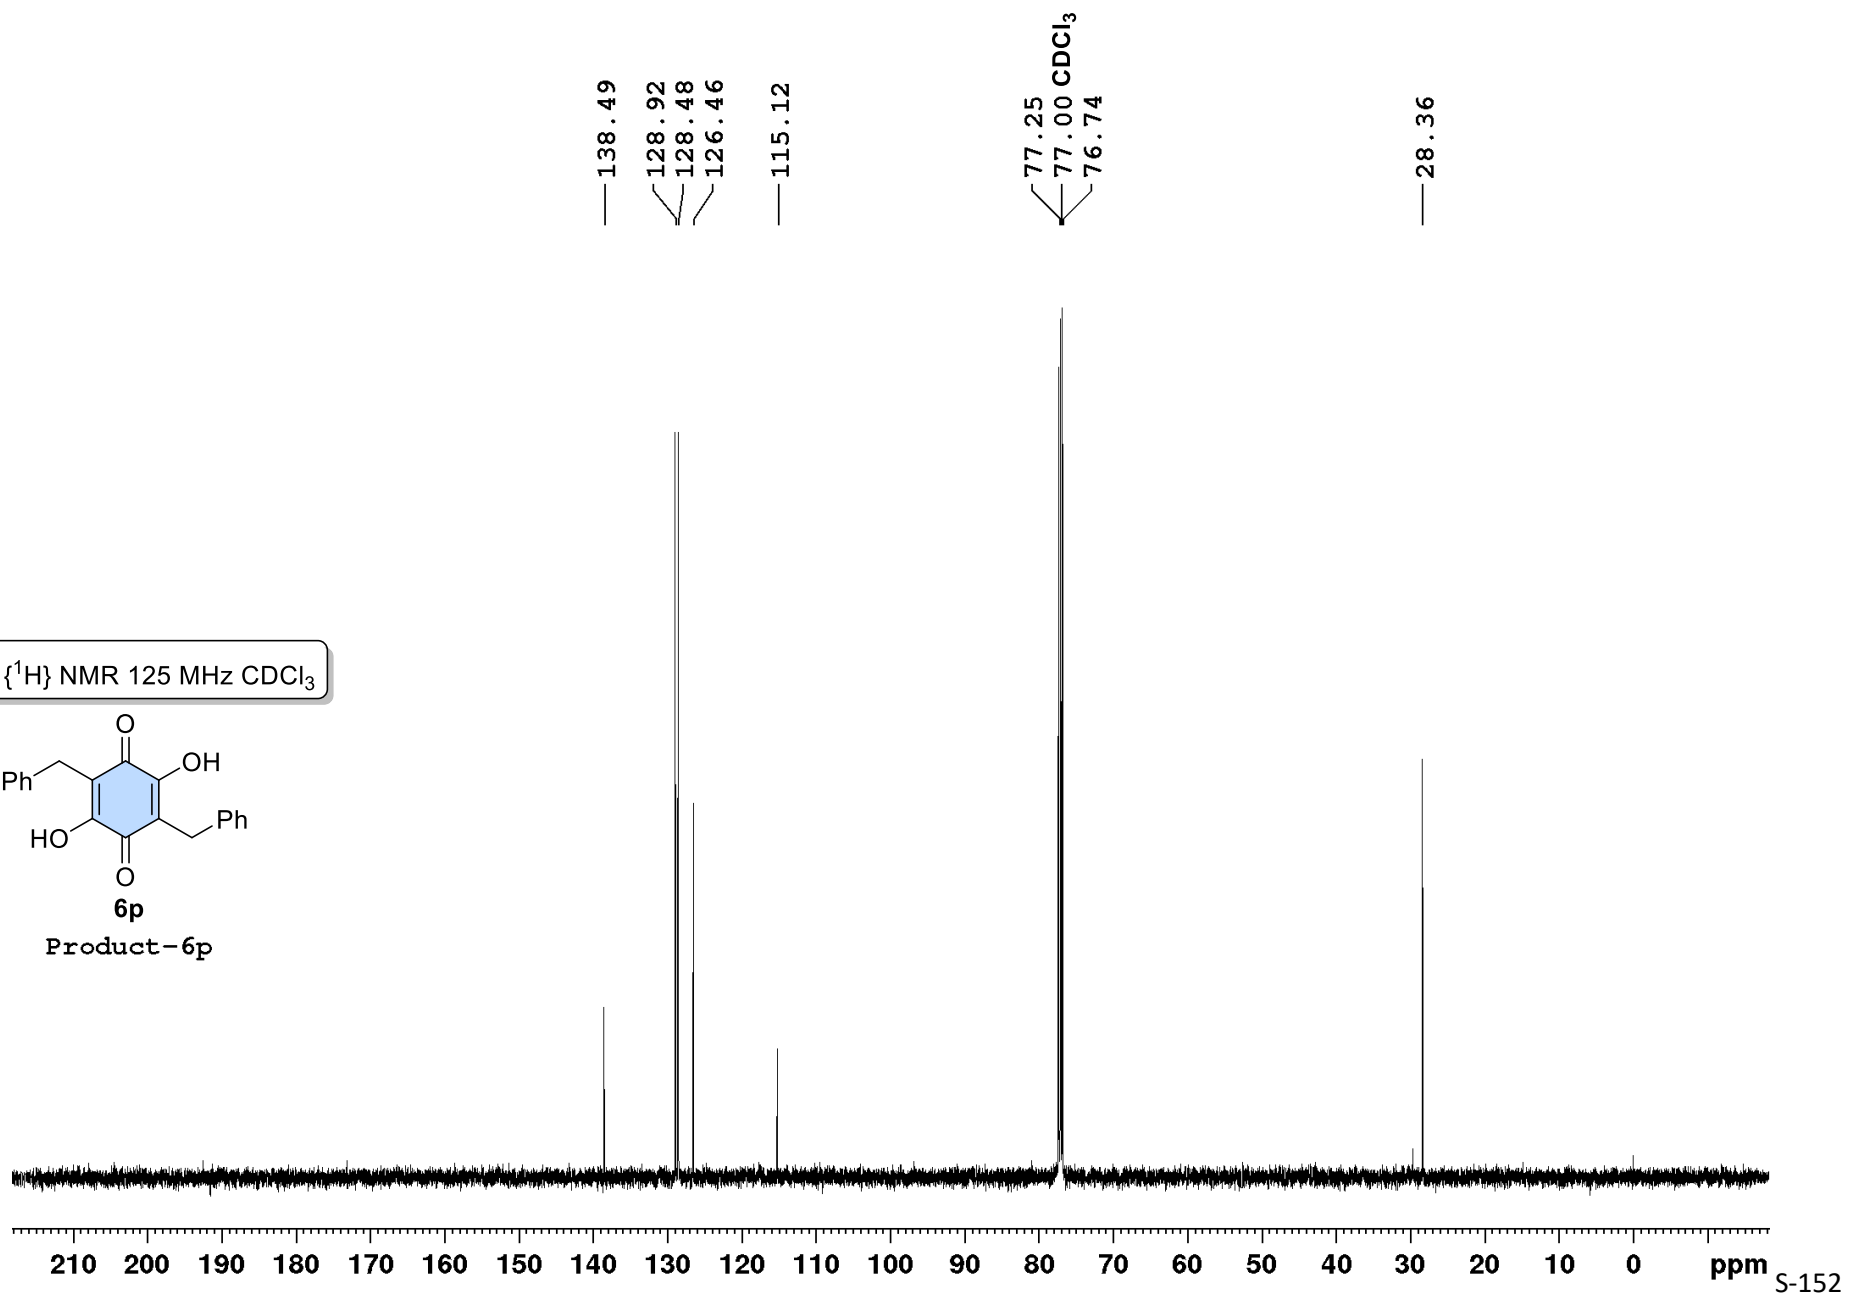



DEPT-135 125 MHz CDCl<sub>3</sub>

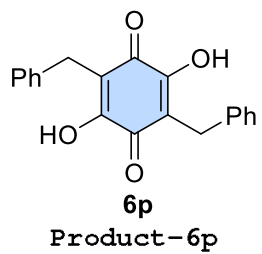

128.92  
128.49  
126.47

28.36

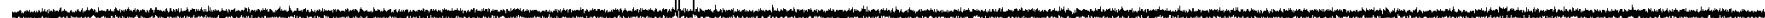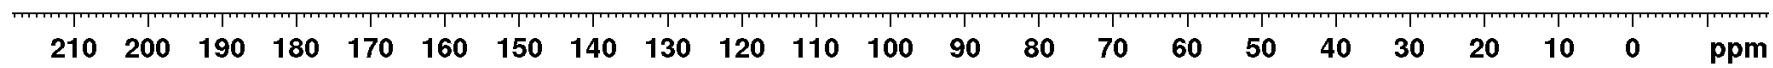

<sup>1</sup>H NMR 500 MHz CDCl<sub>3</sub>

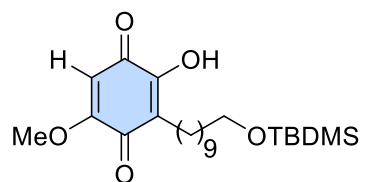

**9aa**  
Product-9aa

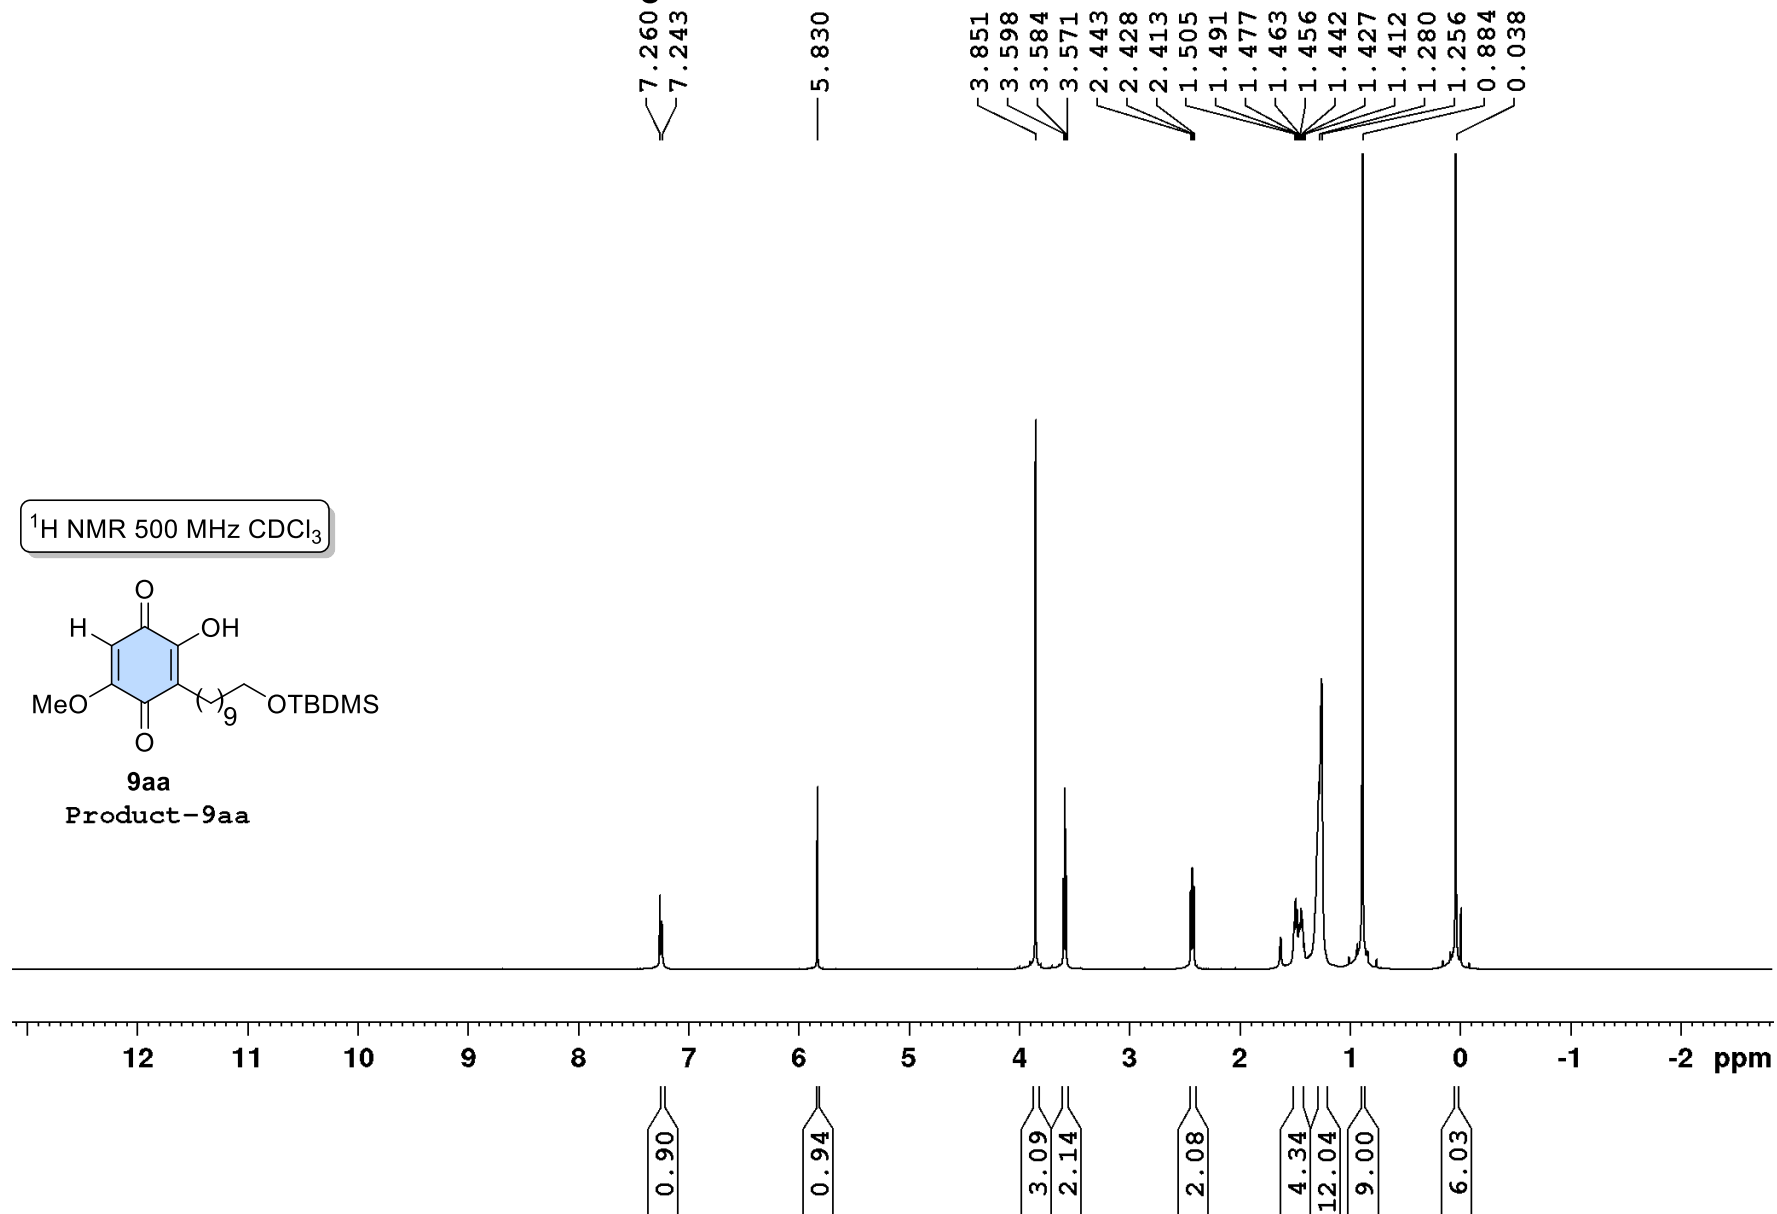

$^{13}\text{C}$  { $^1\text{H}$ } NMR 100 MHz  $\text{CDCl}_3$

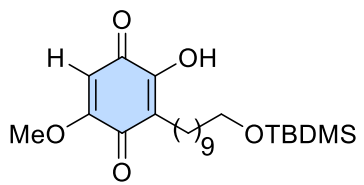

9aa

Product-9aa

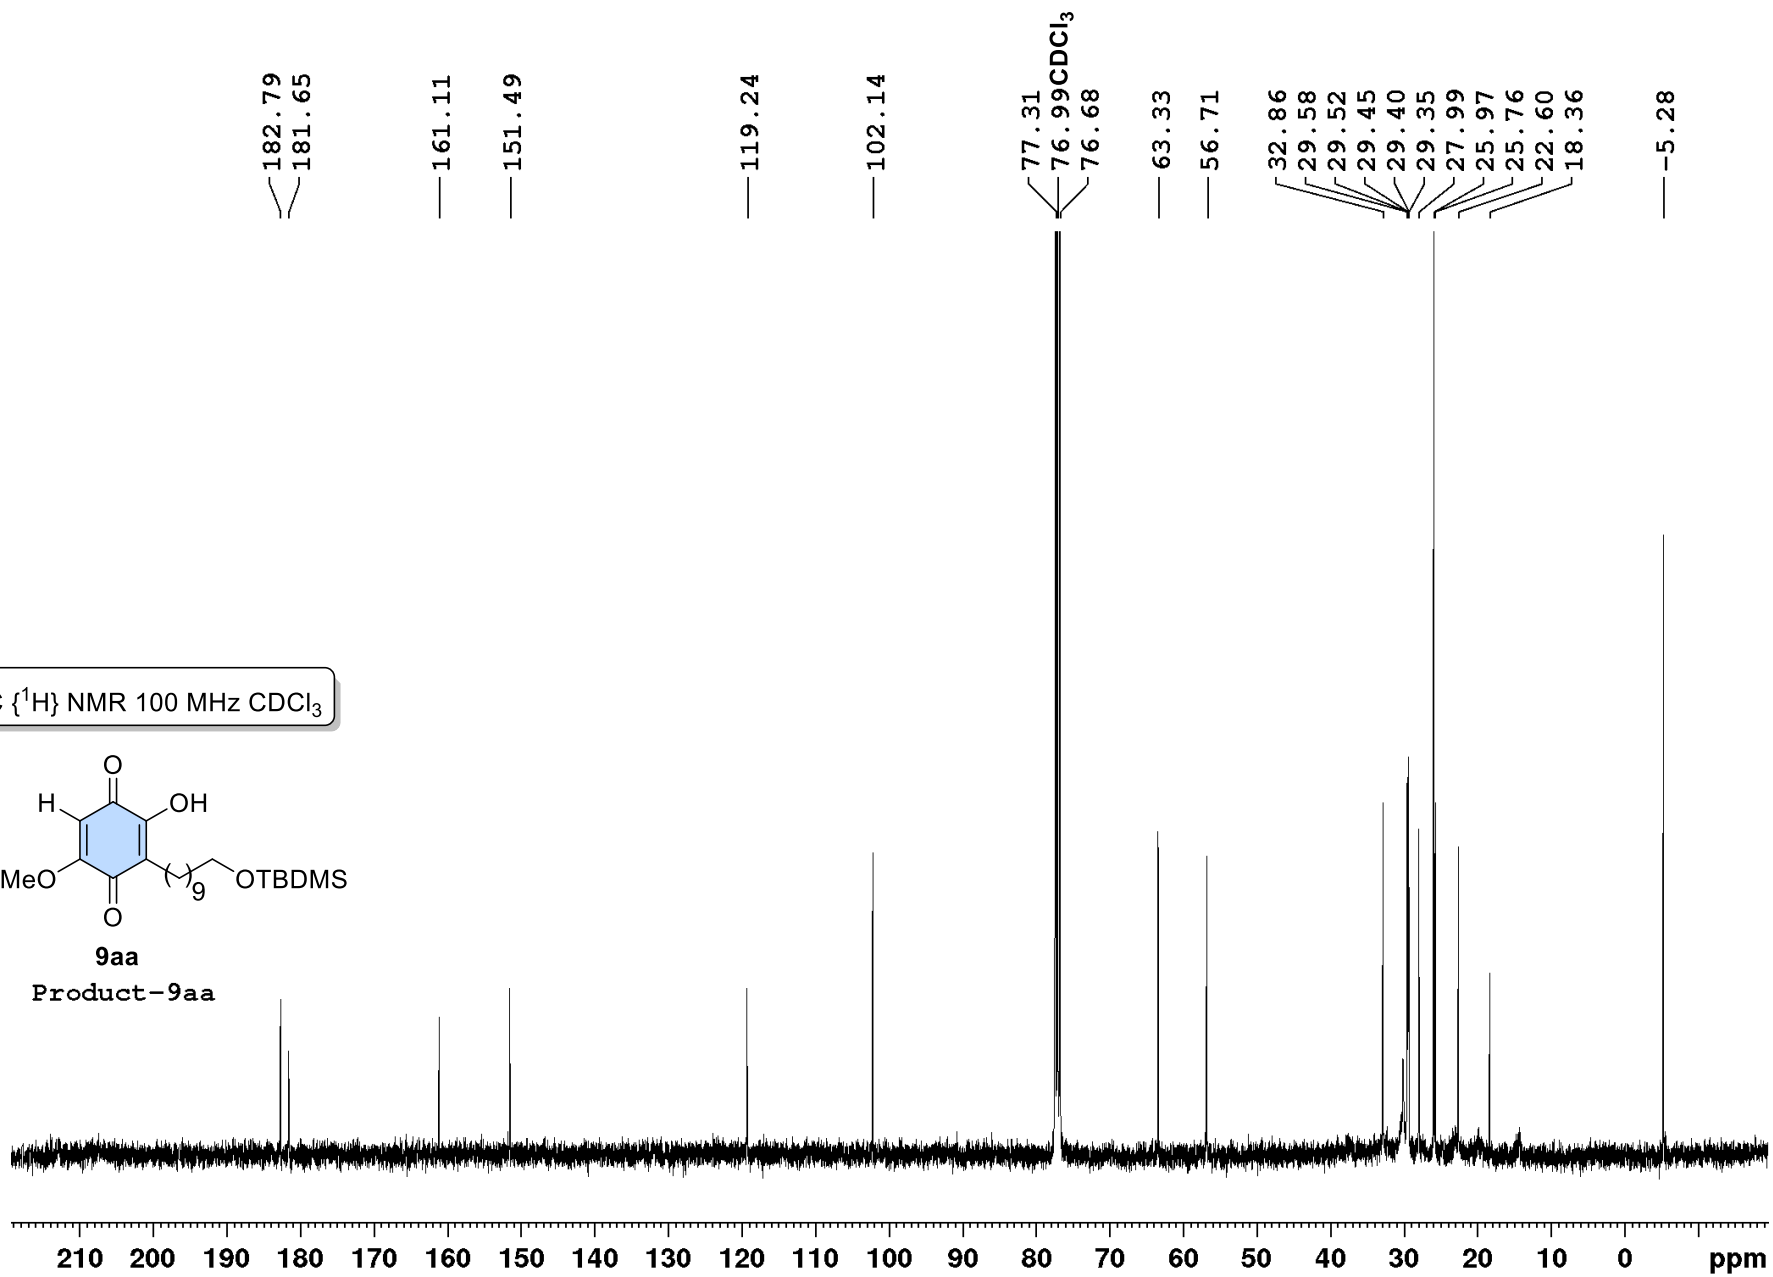

DEPT-135 100 MHz CDCl<sub>3</sub>

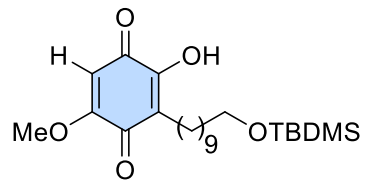

**9aa**  
Product-9aa

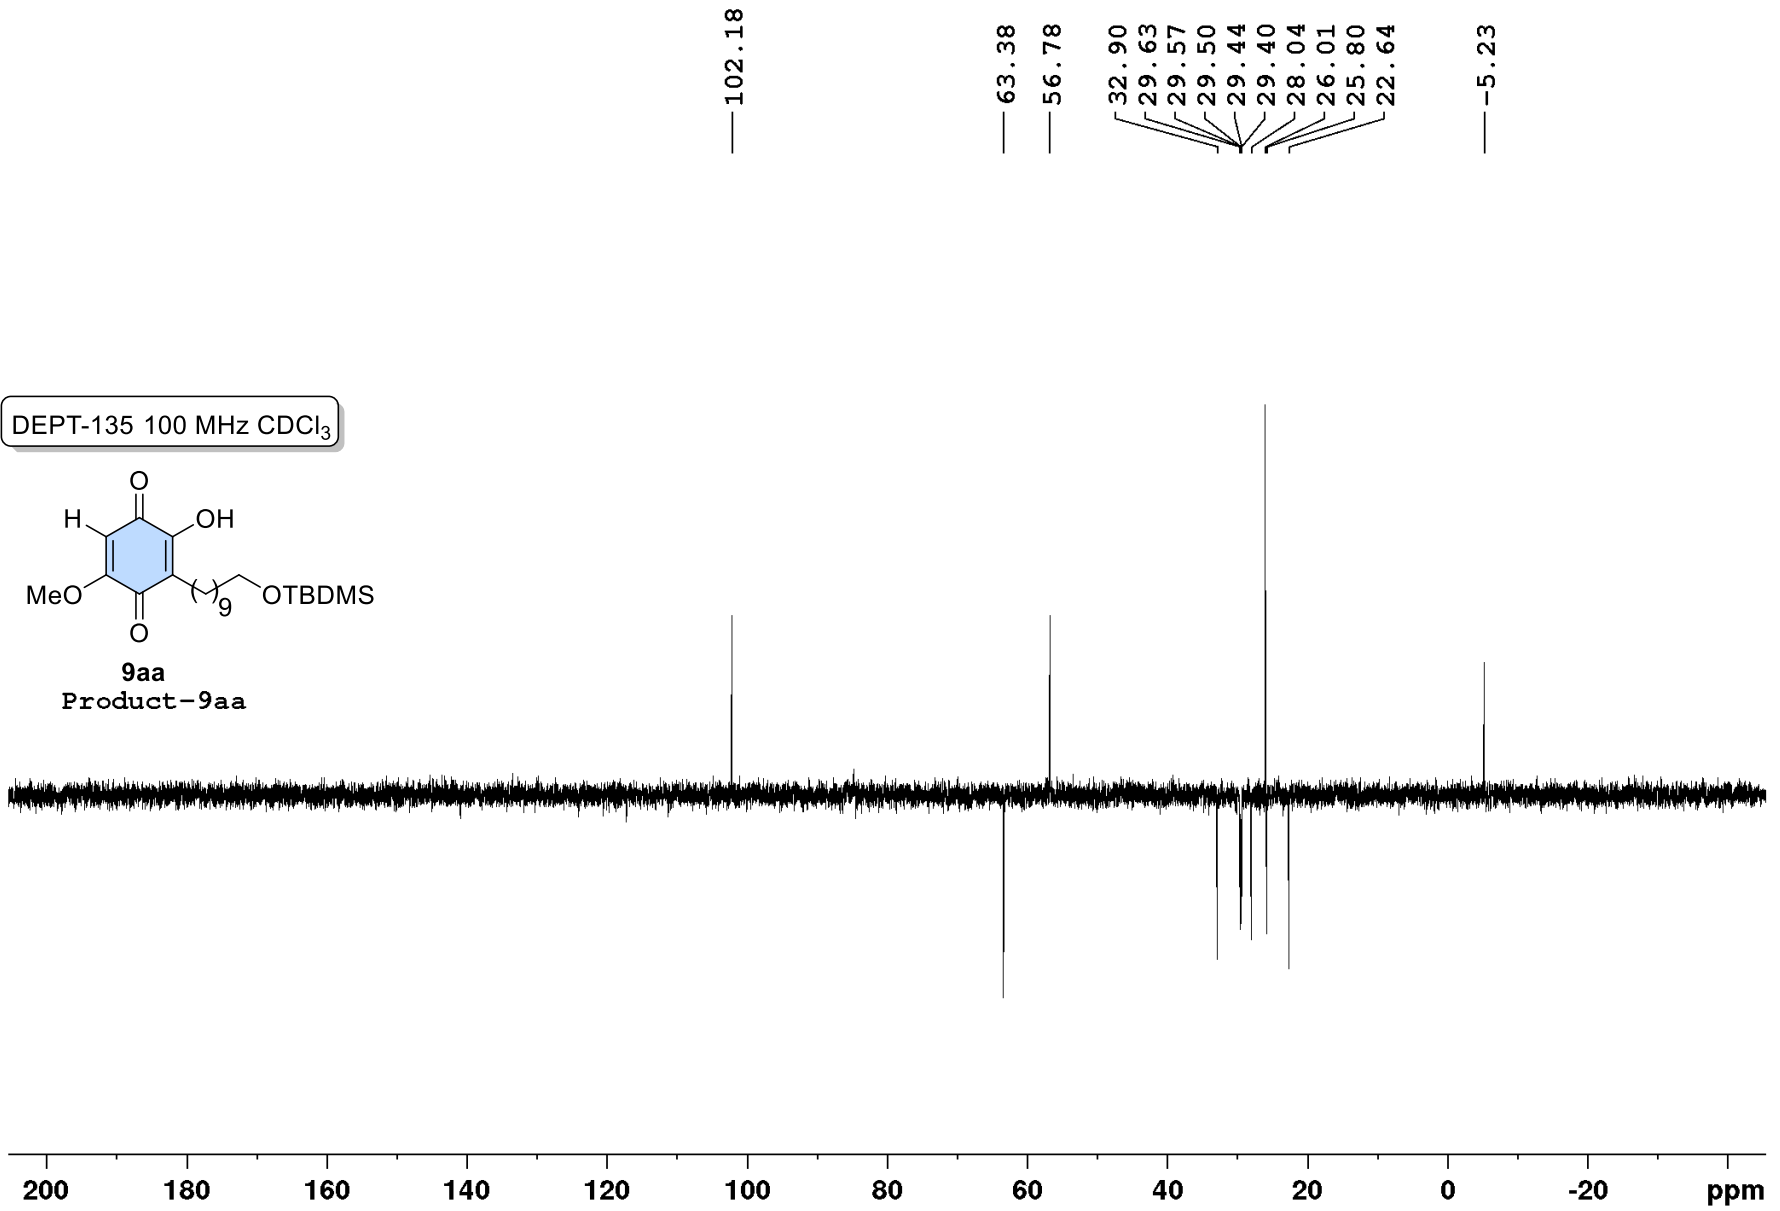

<sup>1</sup>H NMR 500 MHz CDCl<sub>3</sub>

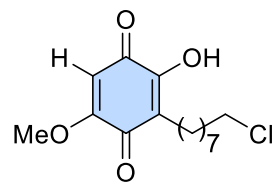

9z

Product-9z

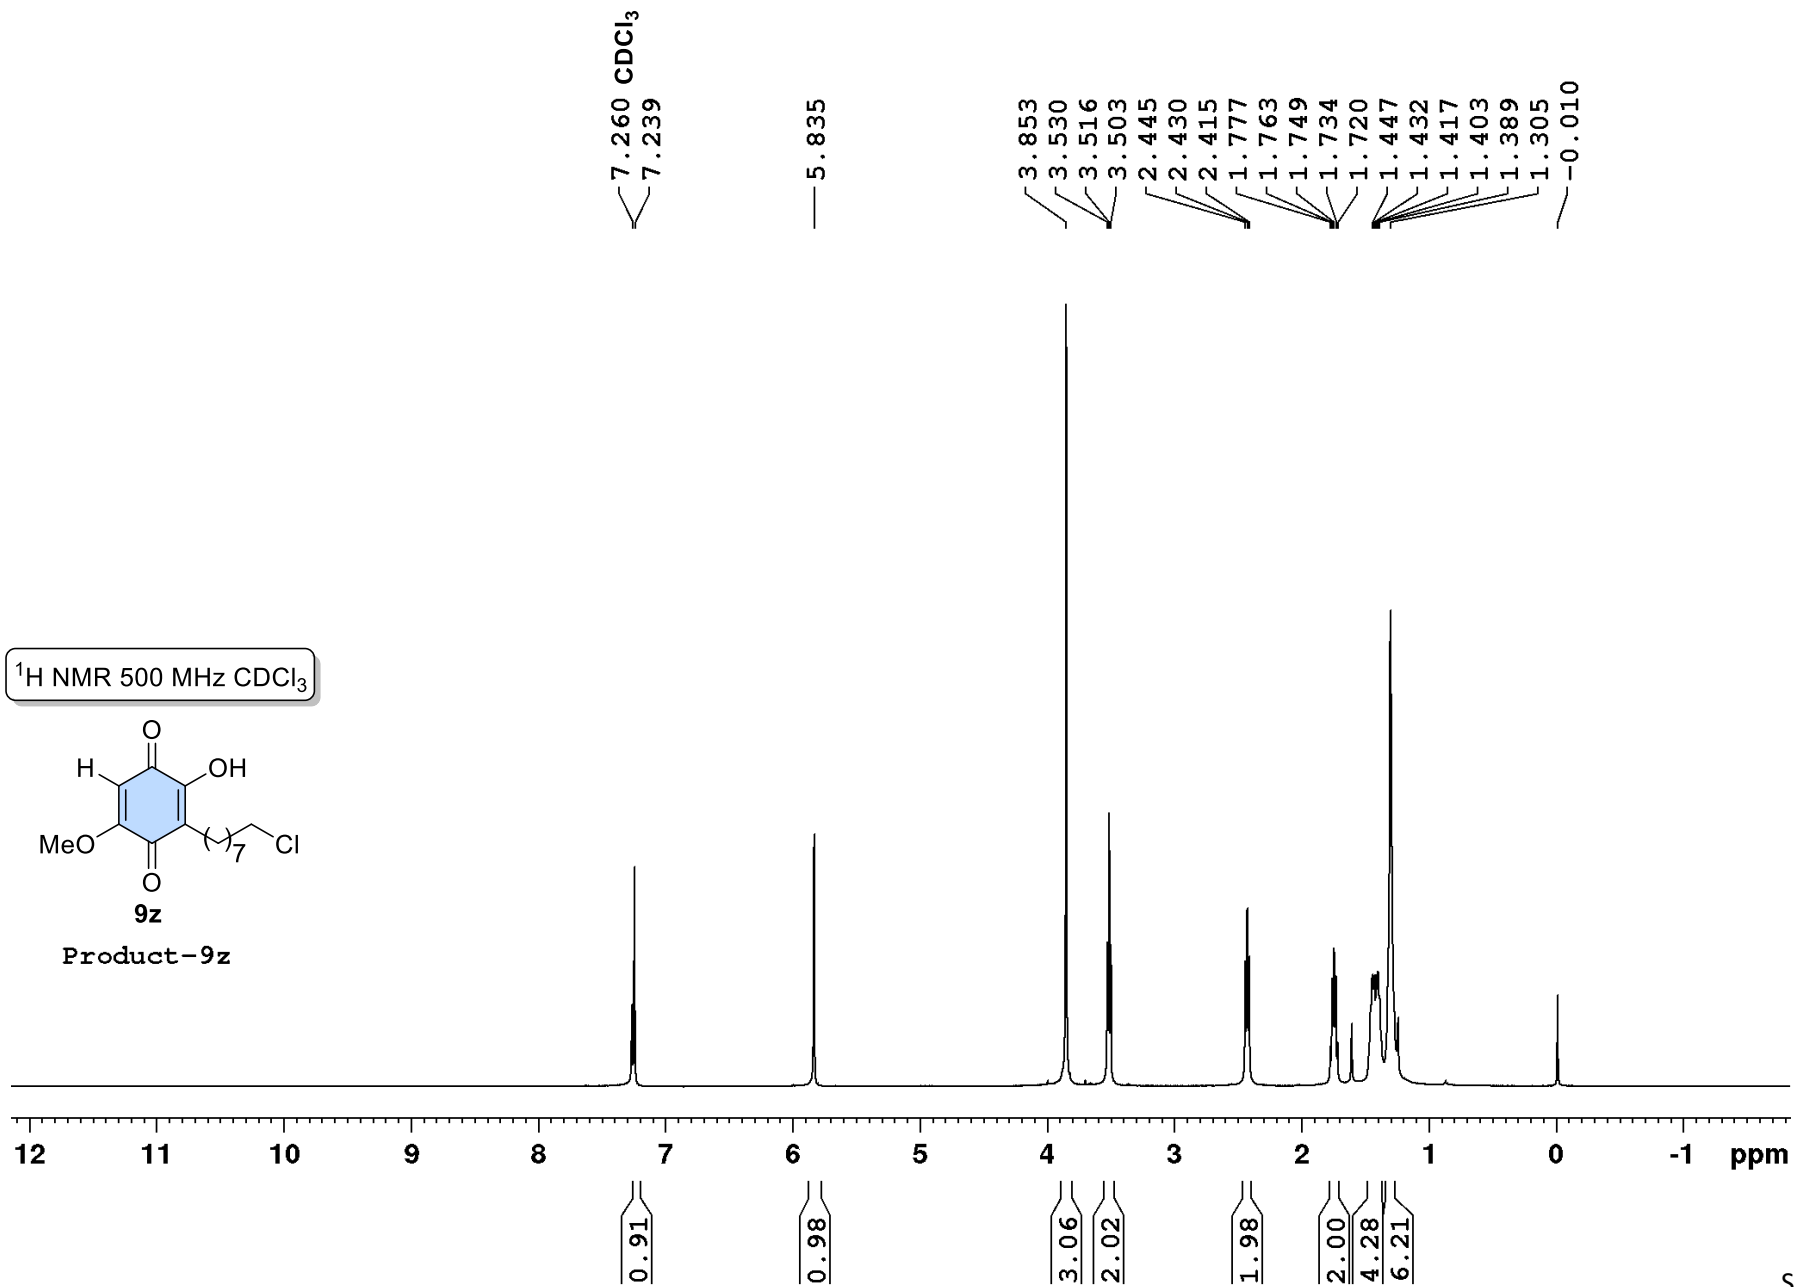

$^{13}\text{C} \{^1\text{H}\}$  NMR 100 MHz  $\text{CDCl}_3$

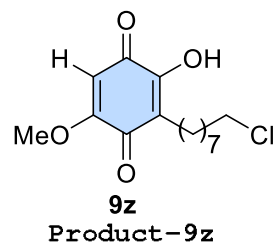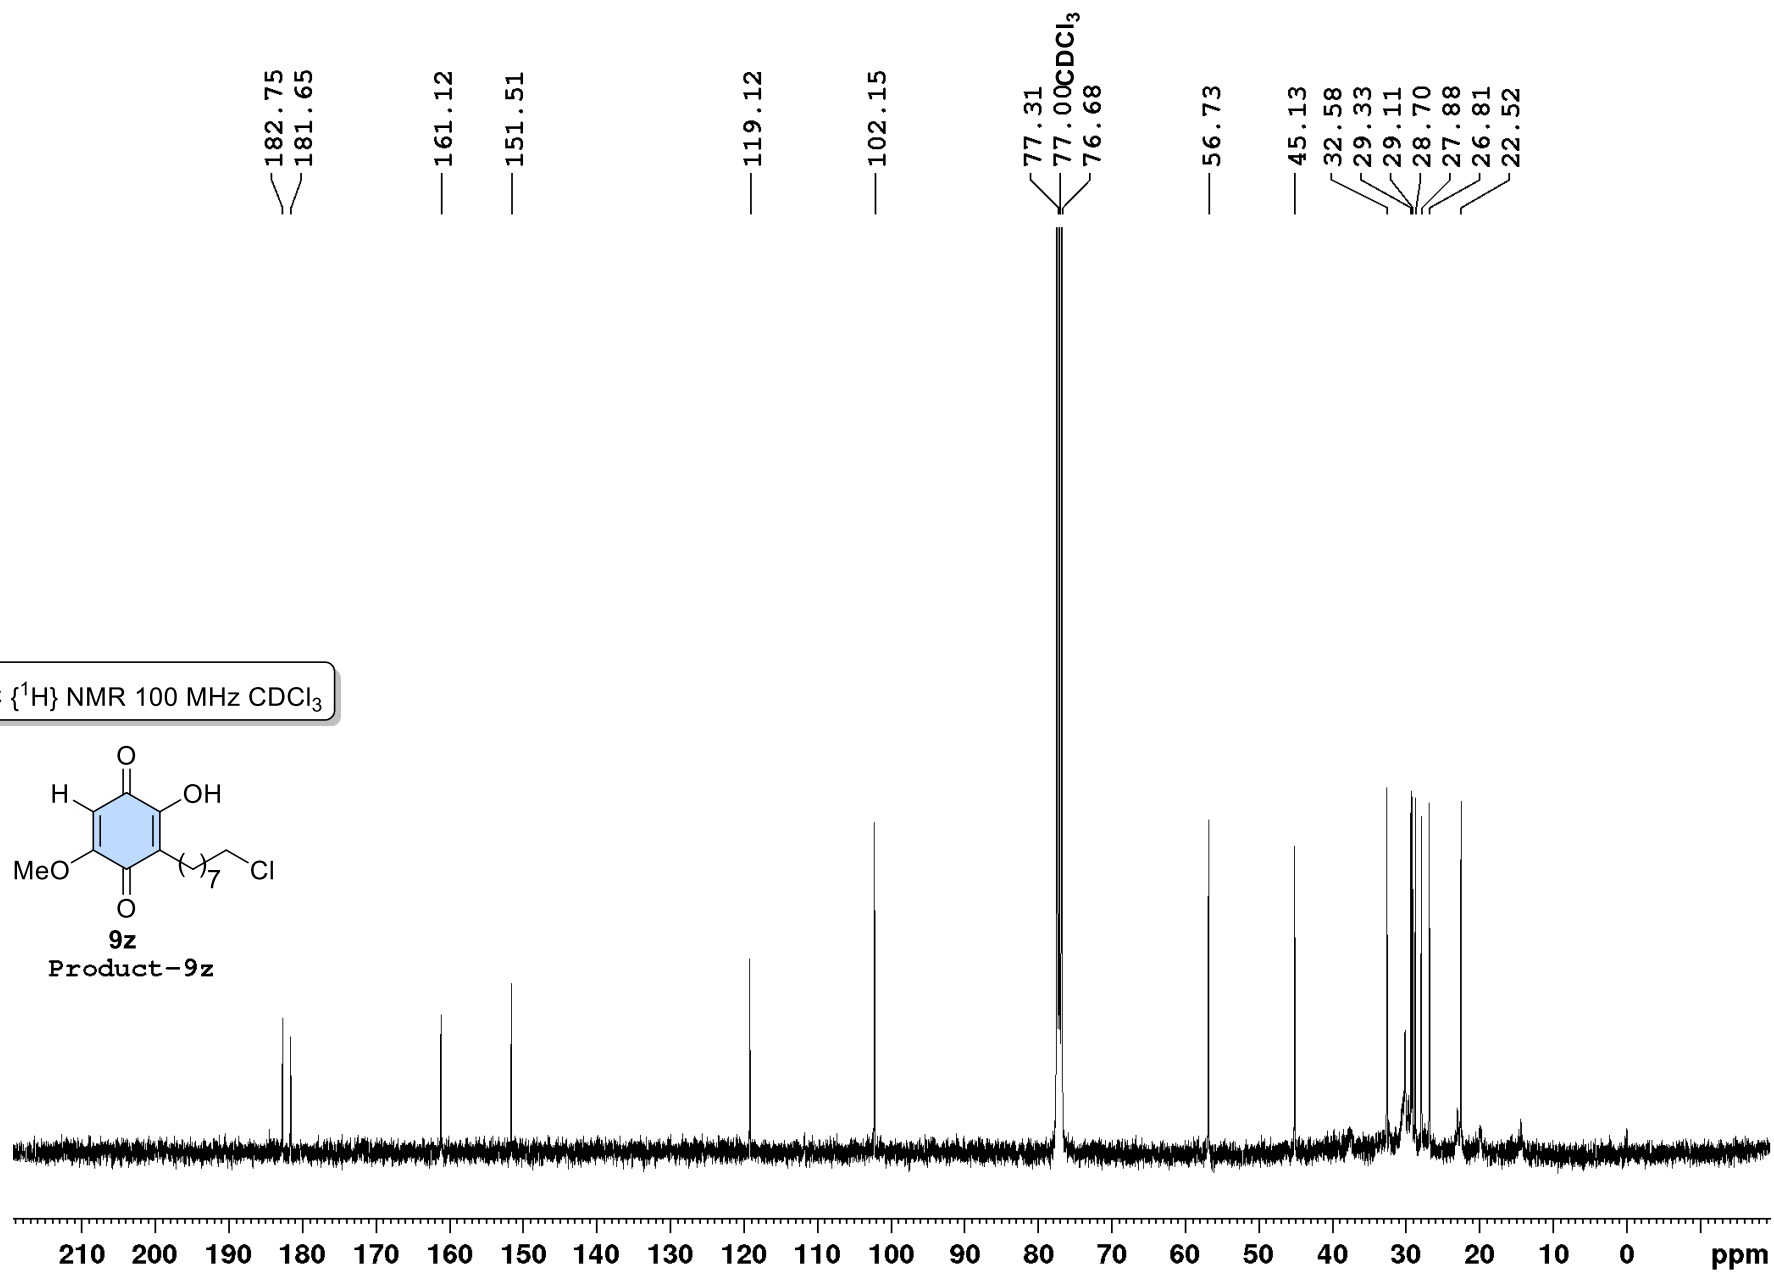

DEPT-135 100 MHz CDCl<sub>3</sub>

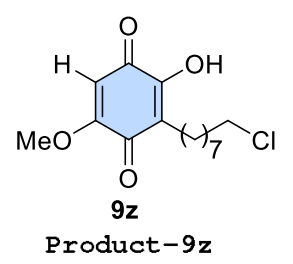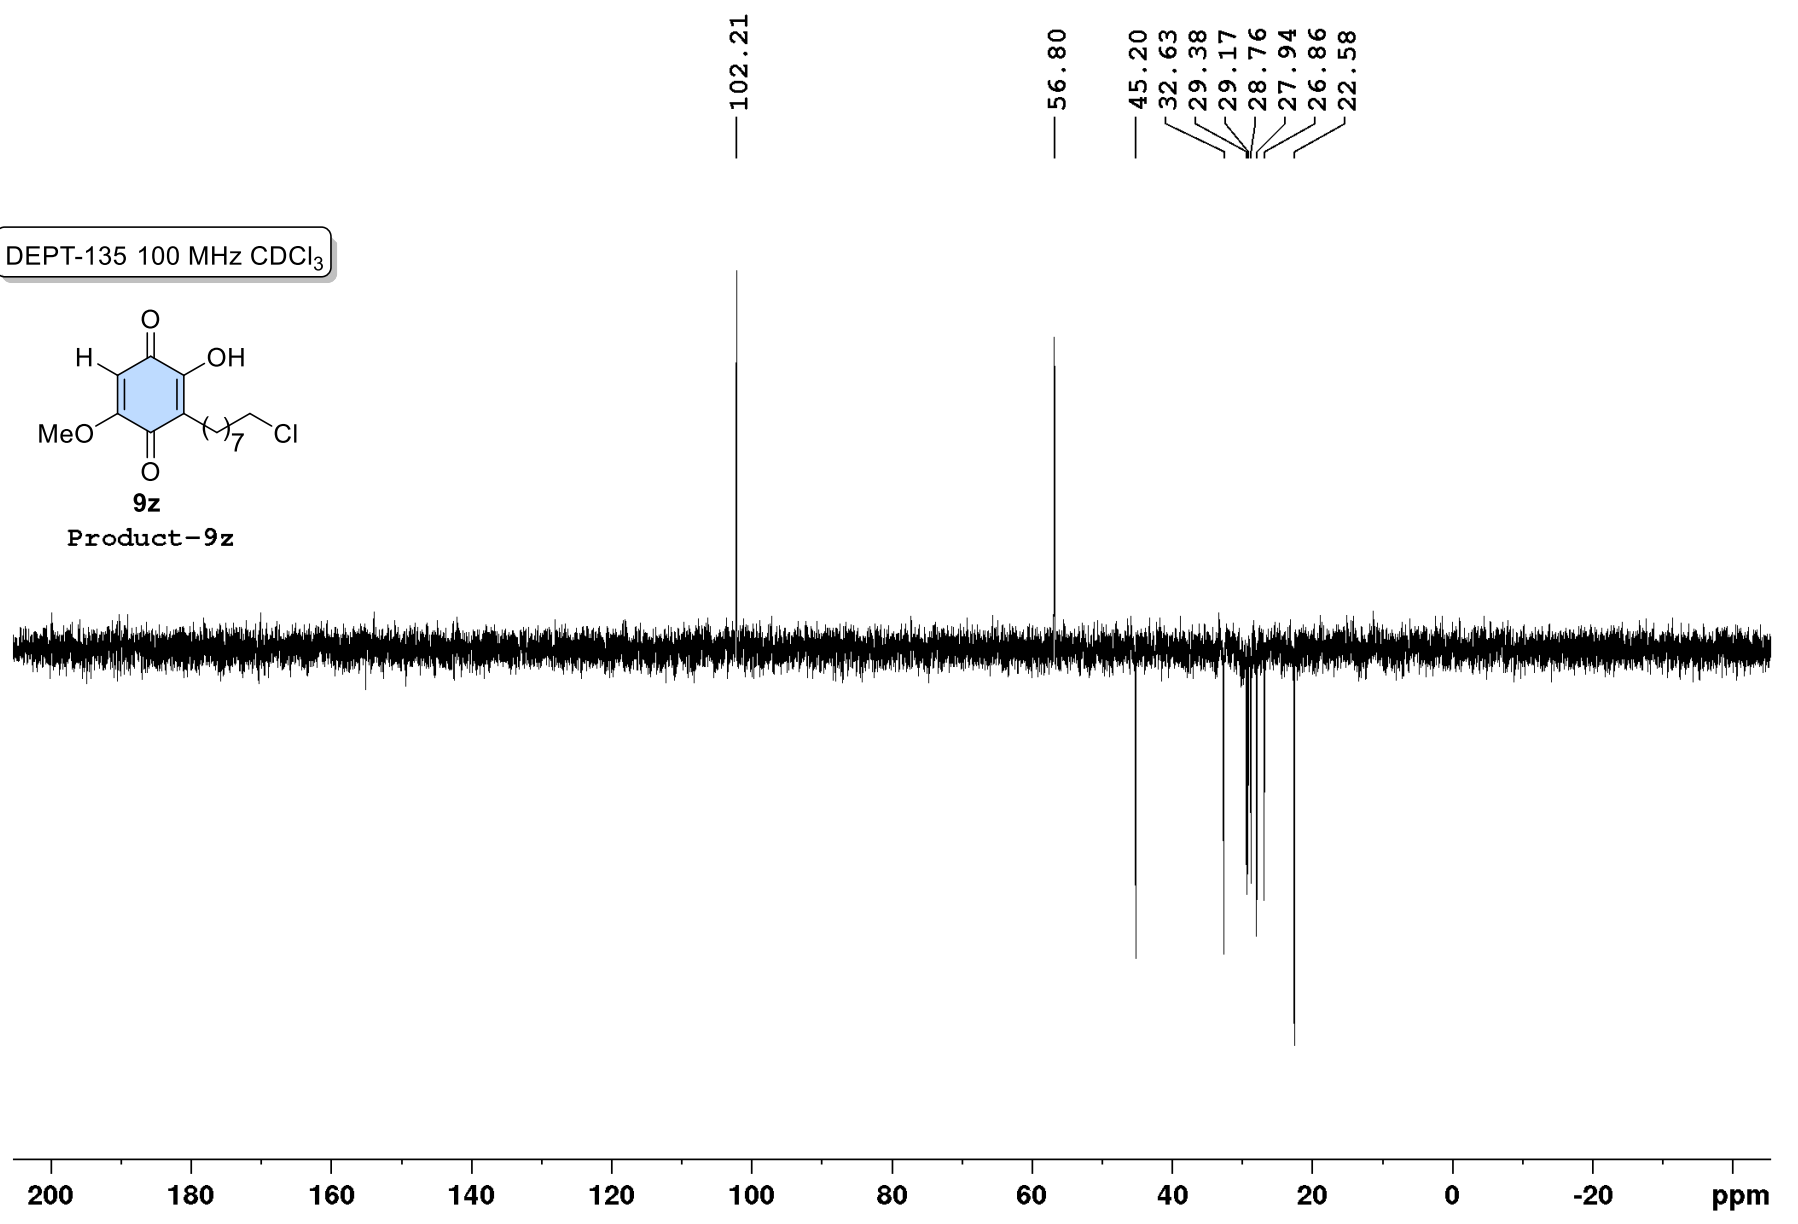

<sup>1</sup>H NMR 500 MHz CDCl<sub>3</sub>

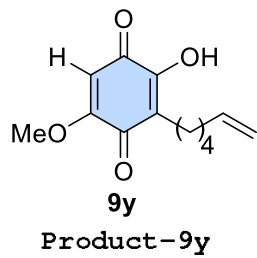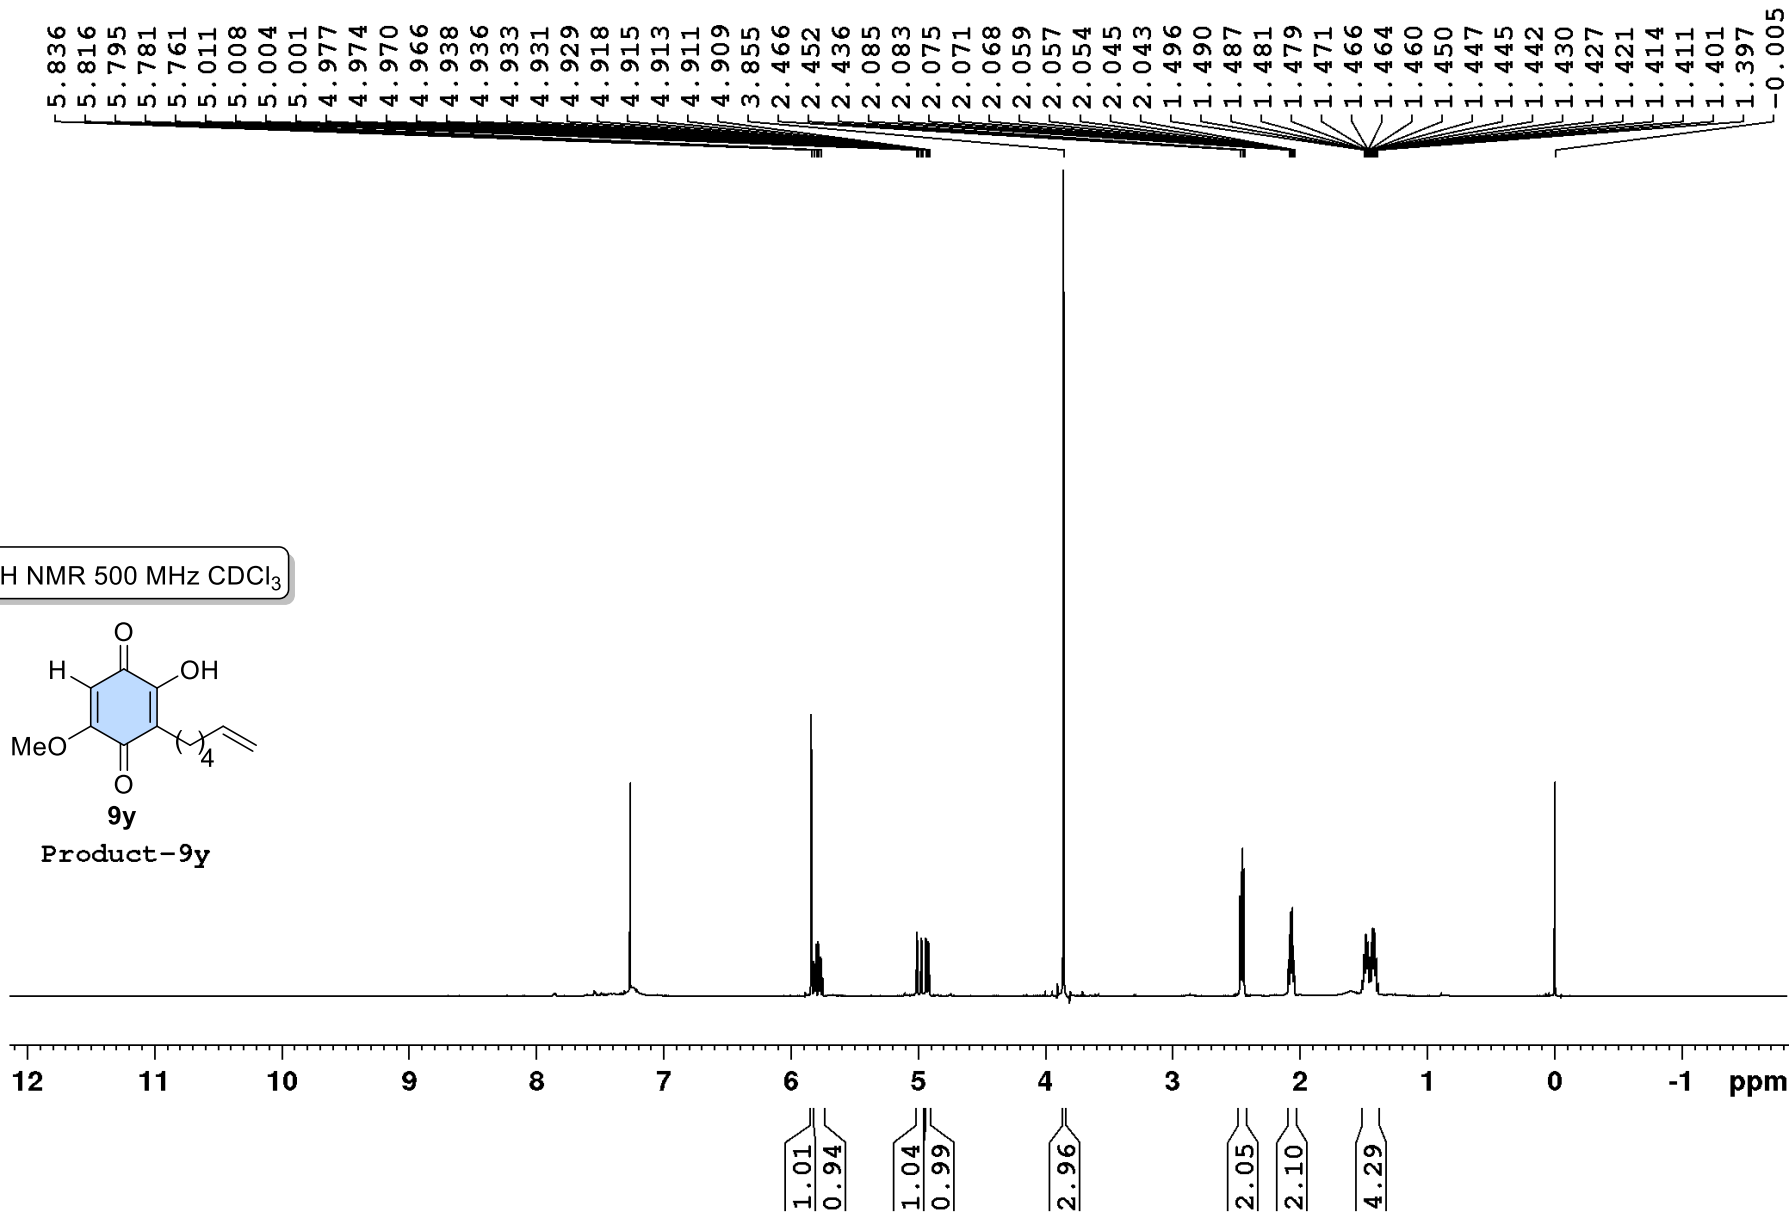



$^{13}\text{C} \{^1\text{H}\}$  NMR 125 MHz  $\text{CDCl}_3$

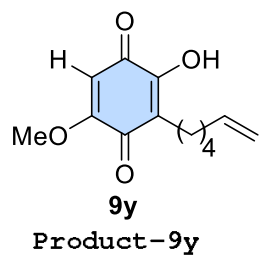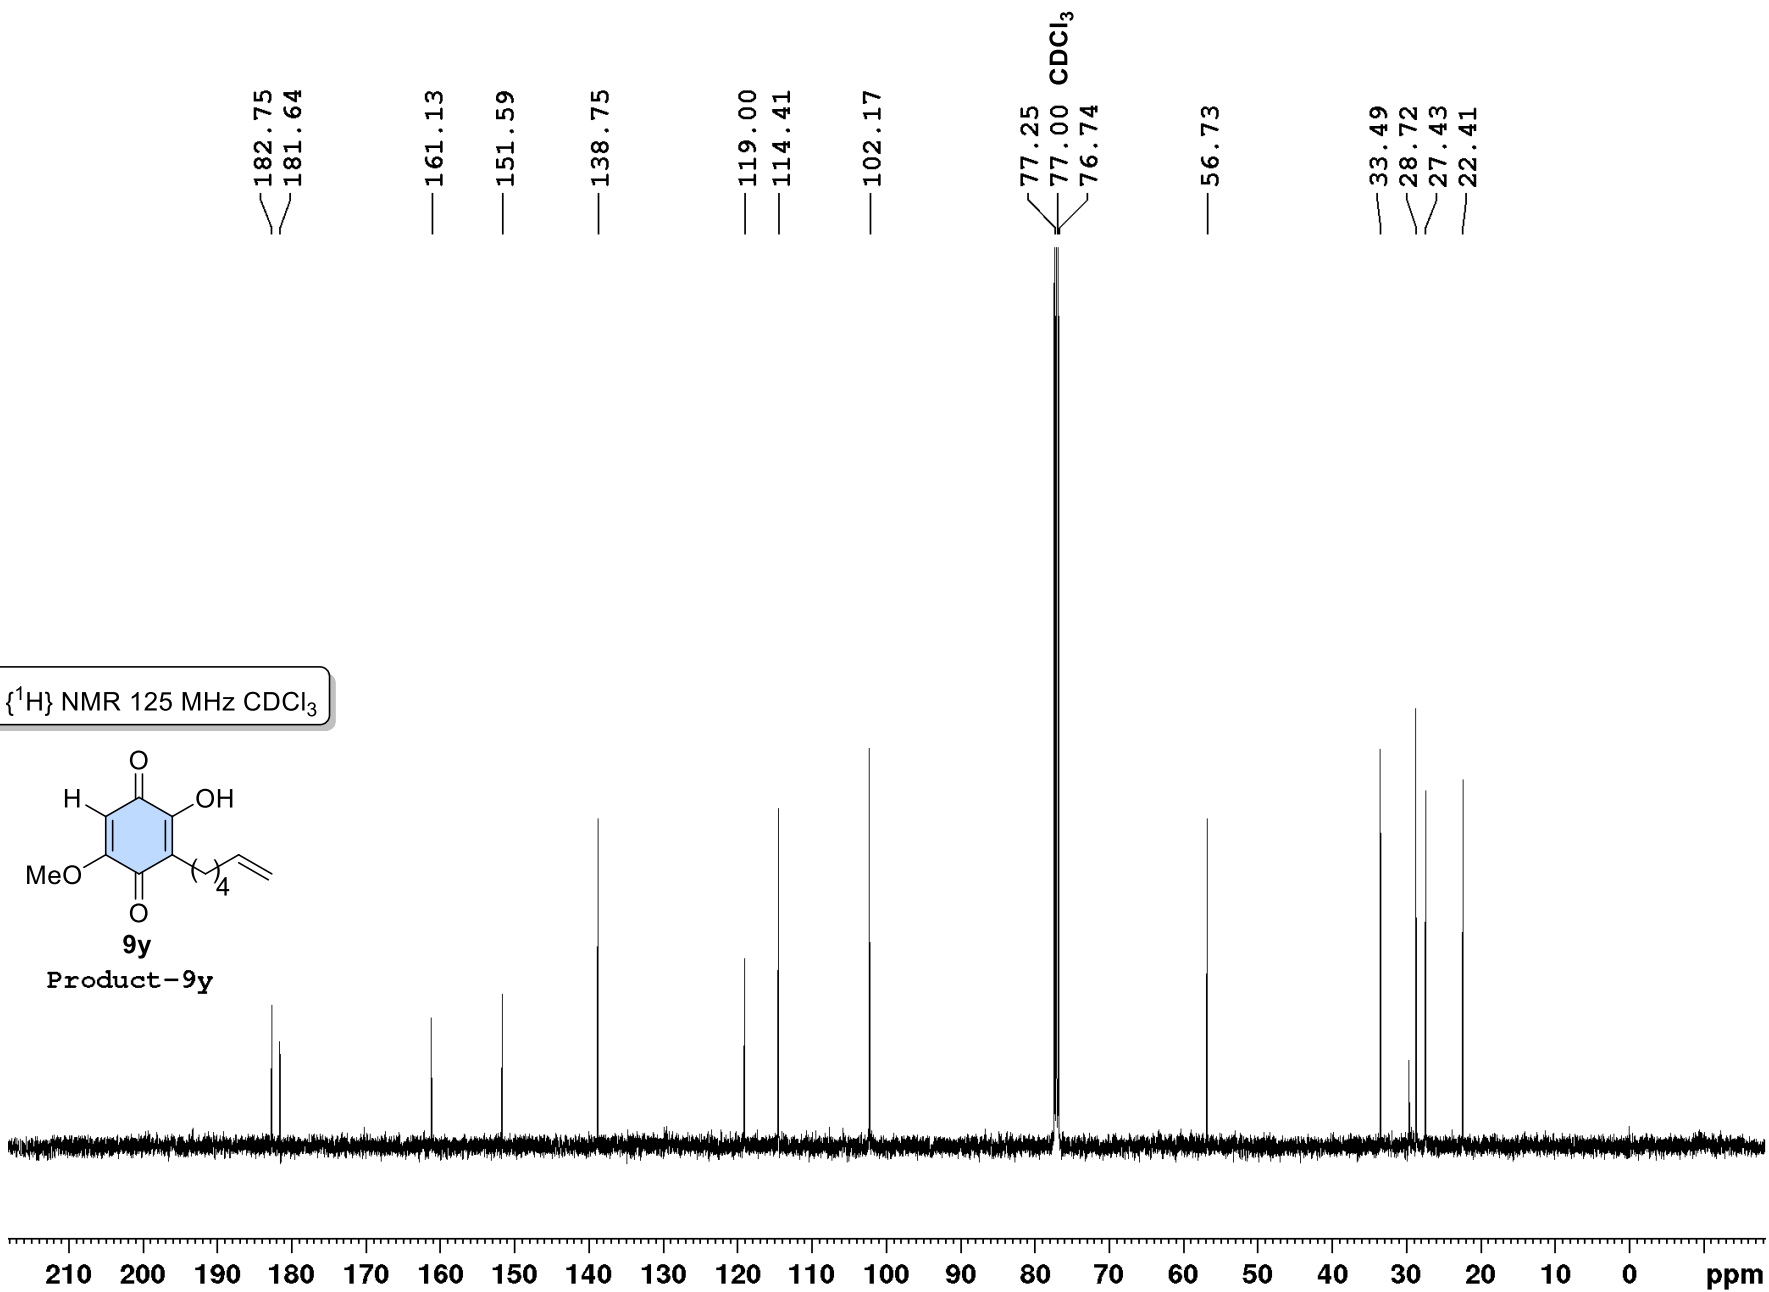

DEPT-135 100 MHz CDCl<sub>3</sub>

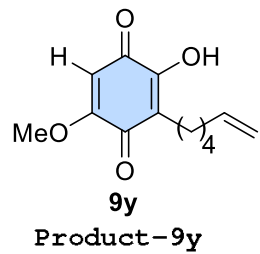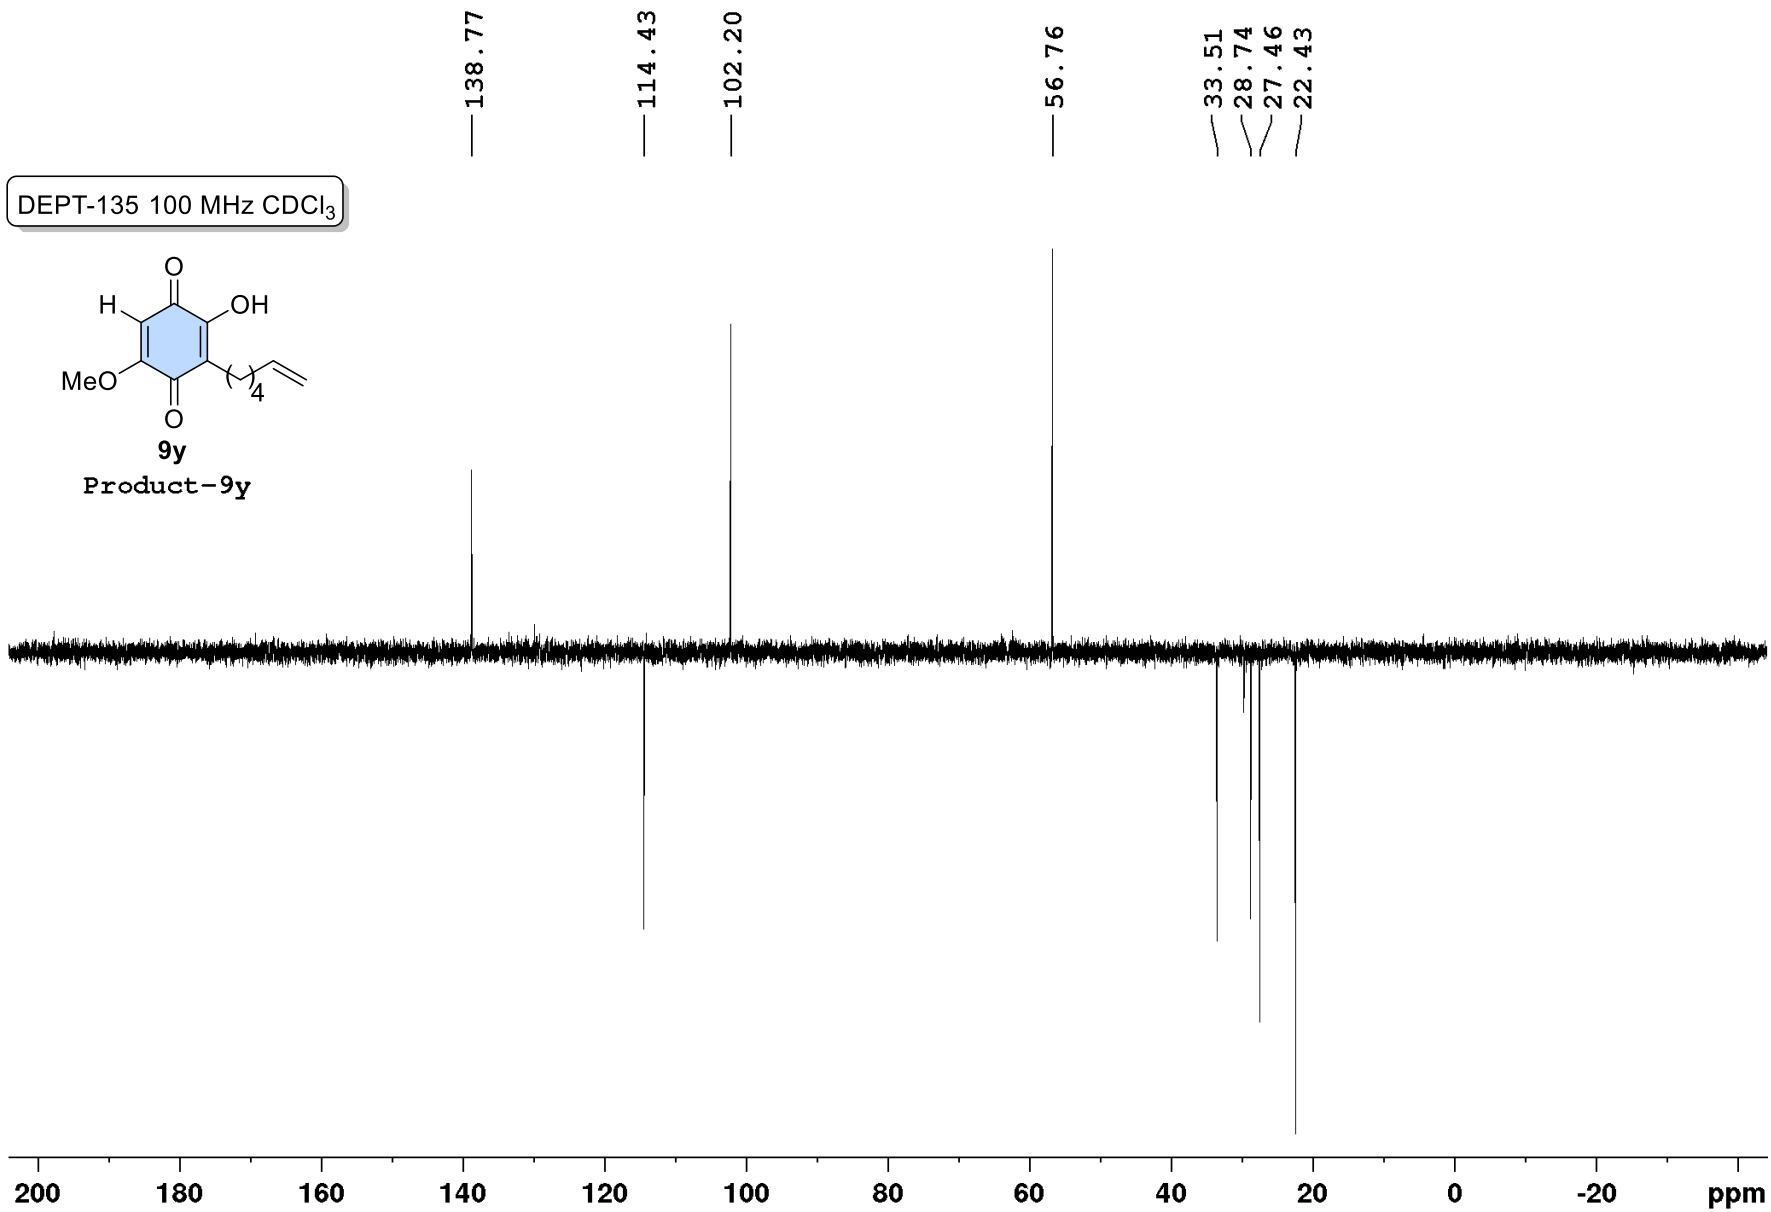

<sup>1</sup>H NMR 500 MHz CDCl<sub>3</sub>

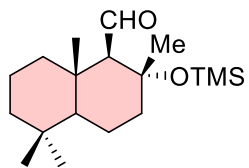

(-)-13  
Product - (-)-13

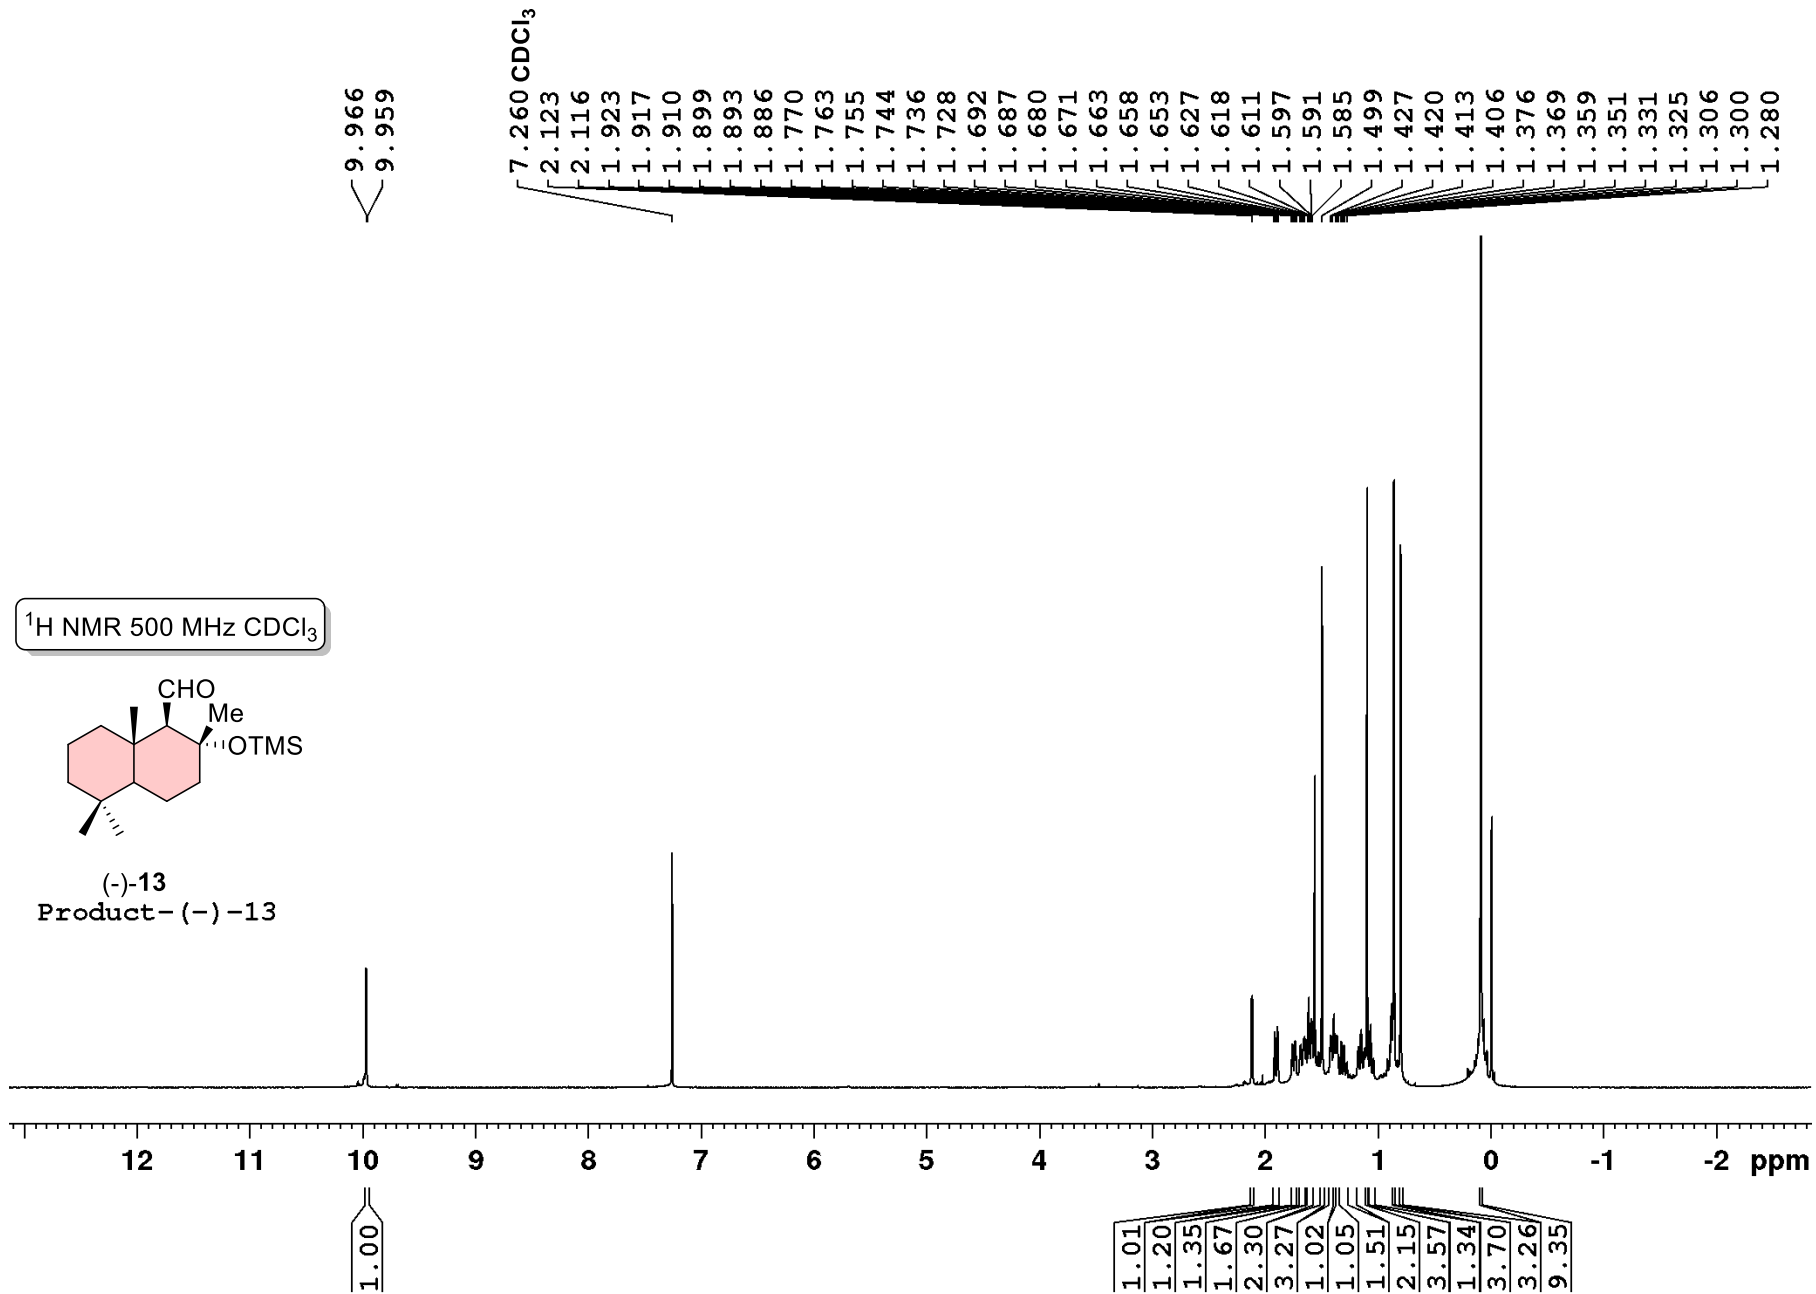

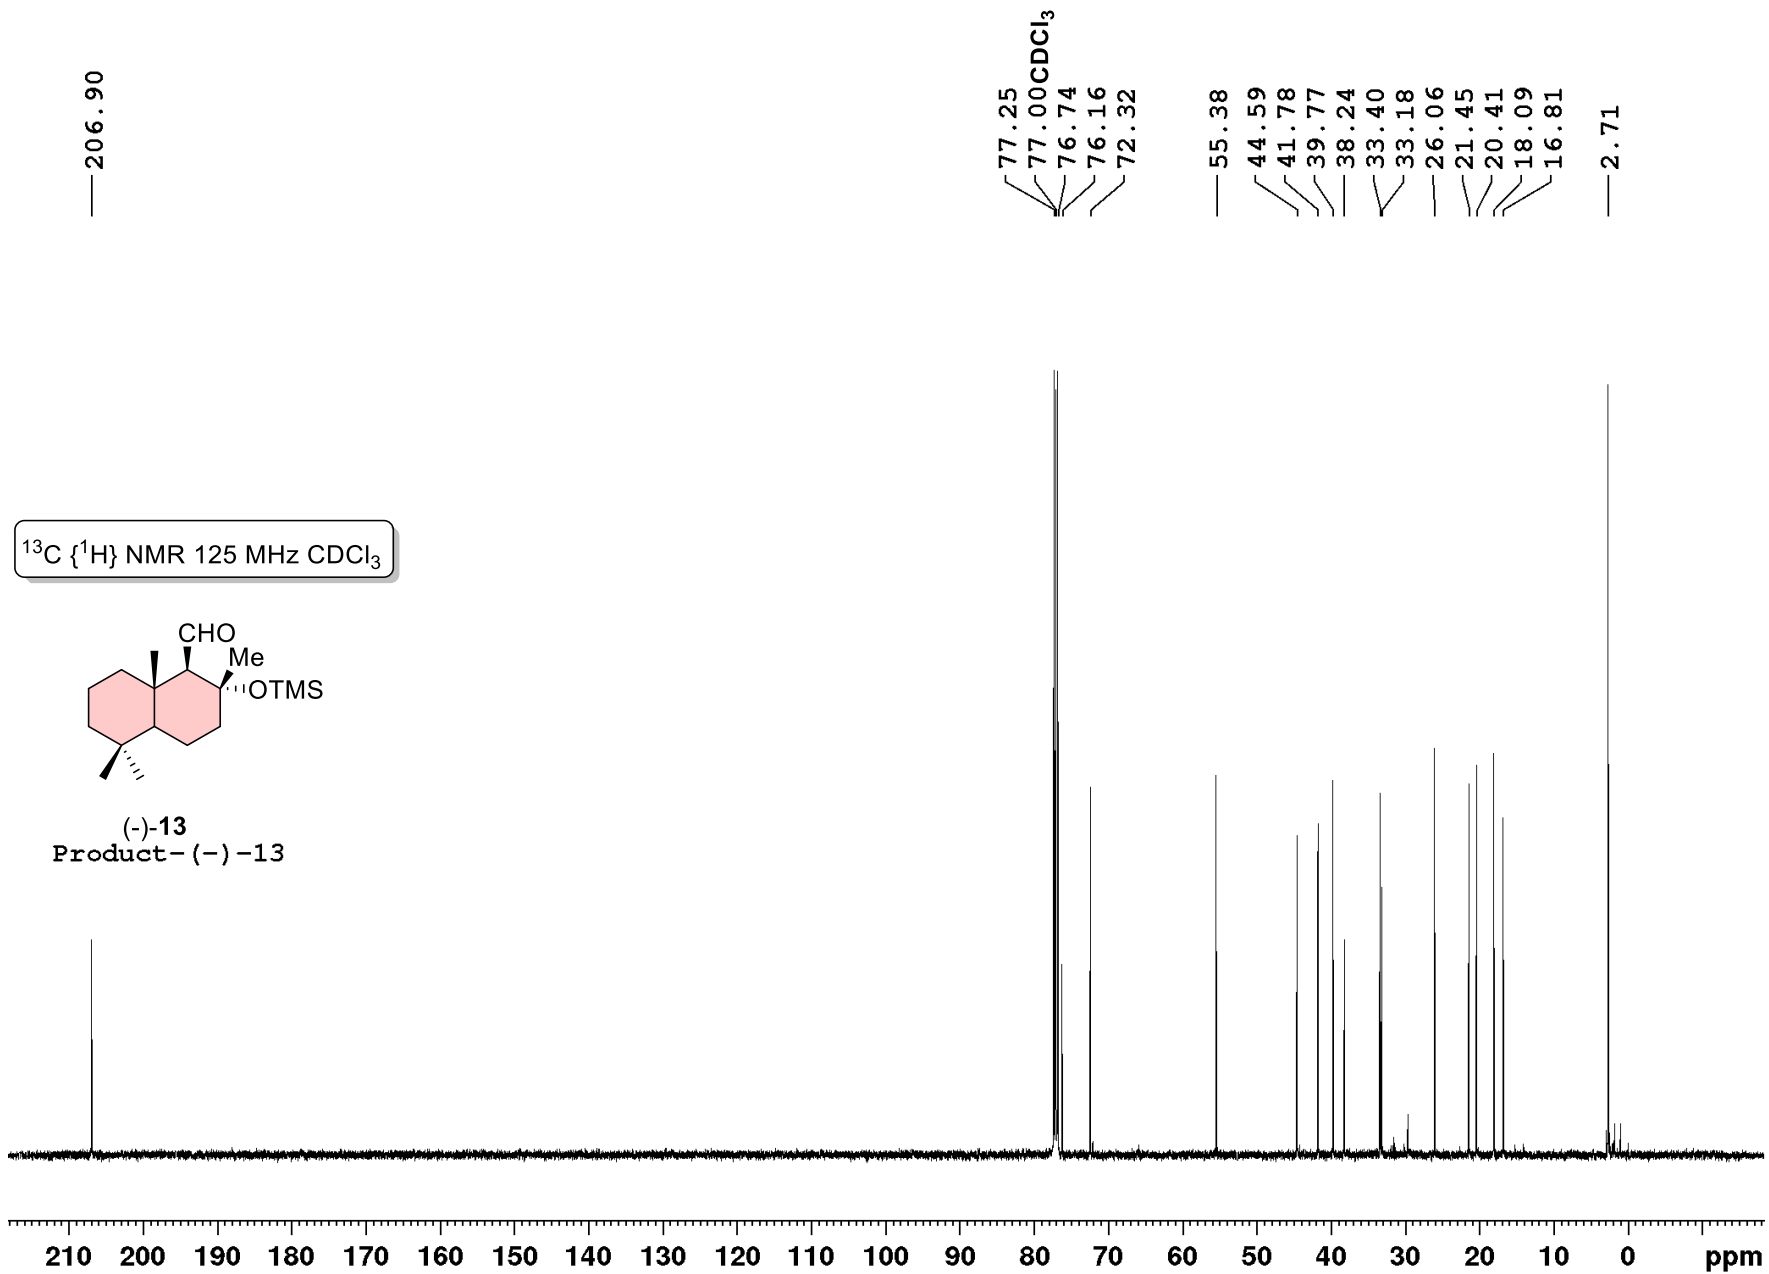

DEPT-135 125 MHz CDCl<sub>3</sub>

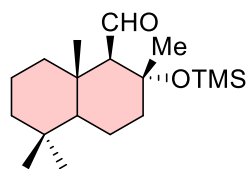

(-)-13  
Product-(-)-13

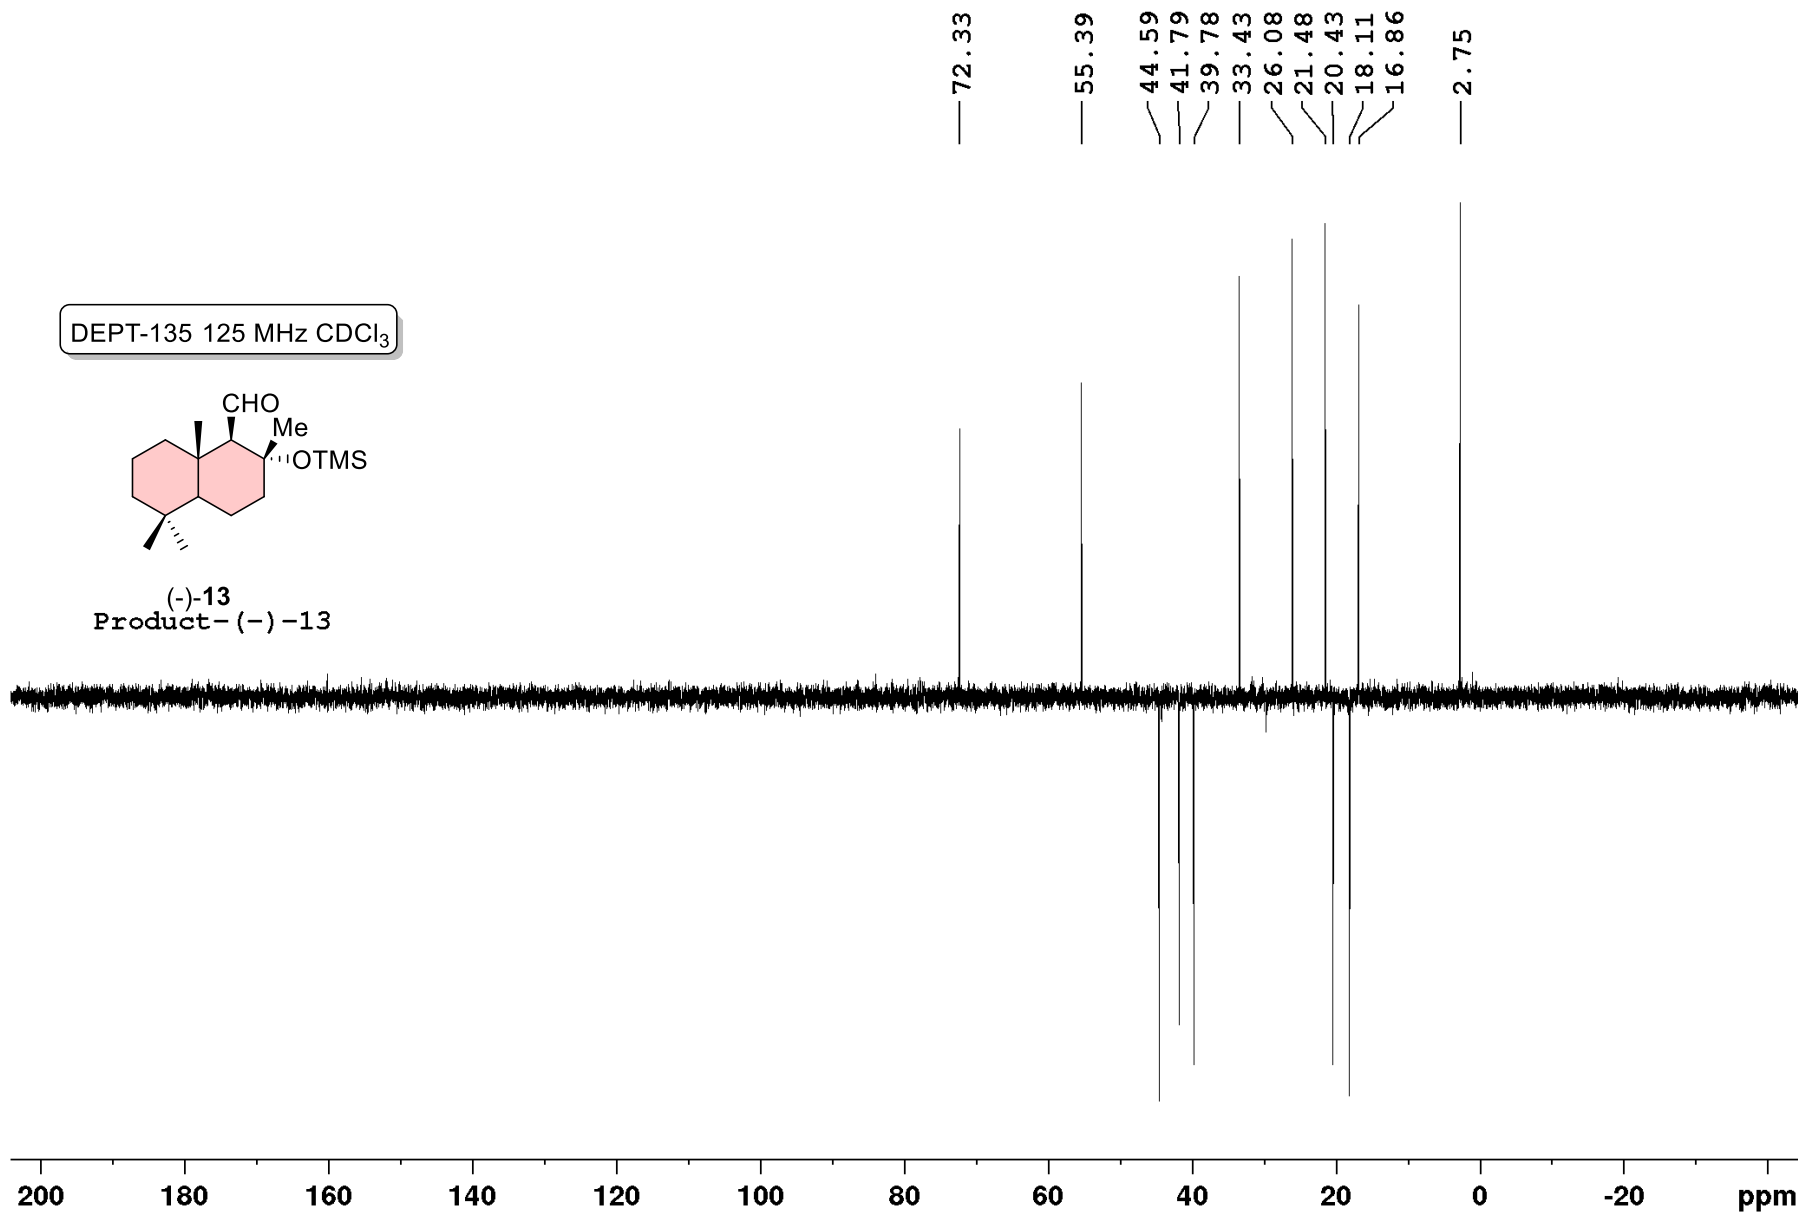

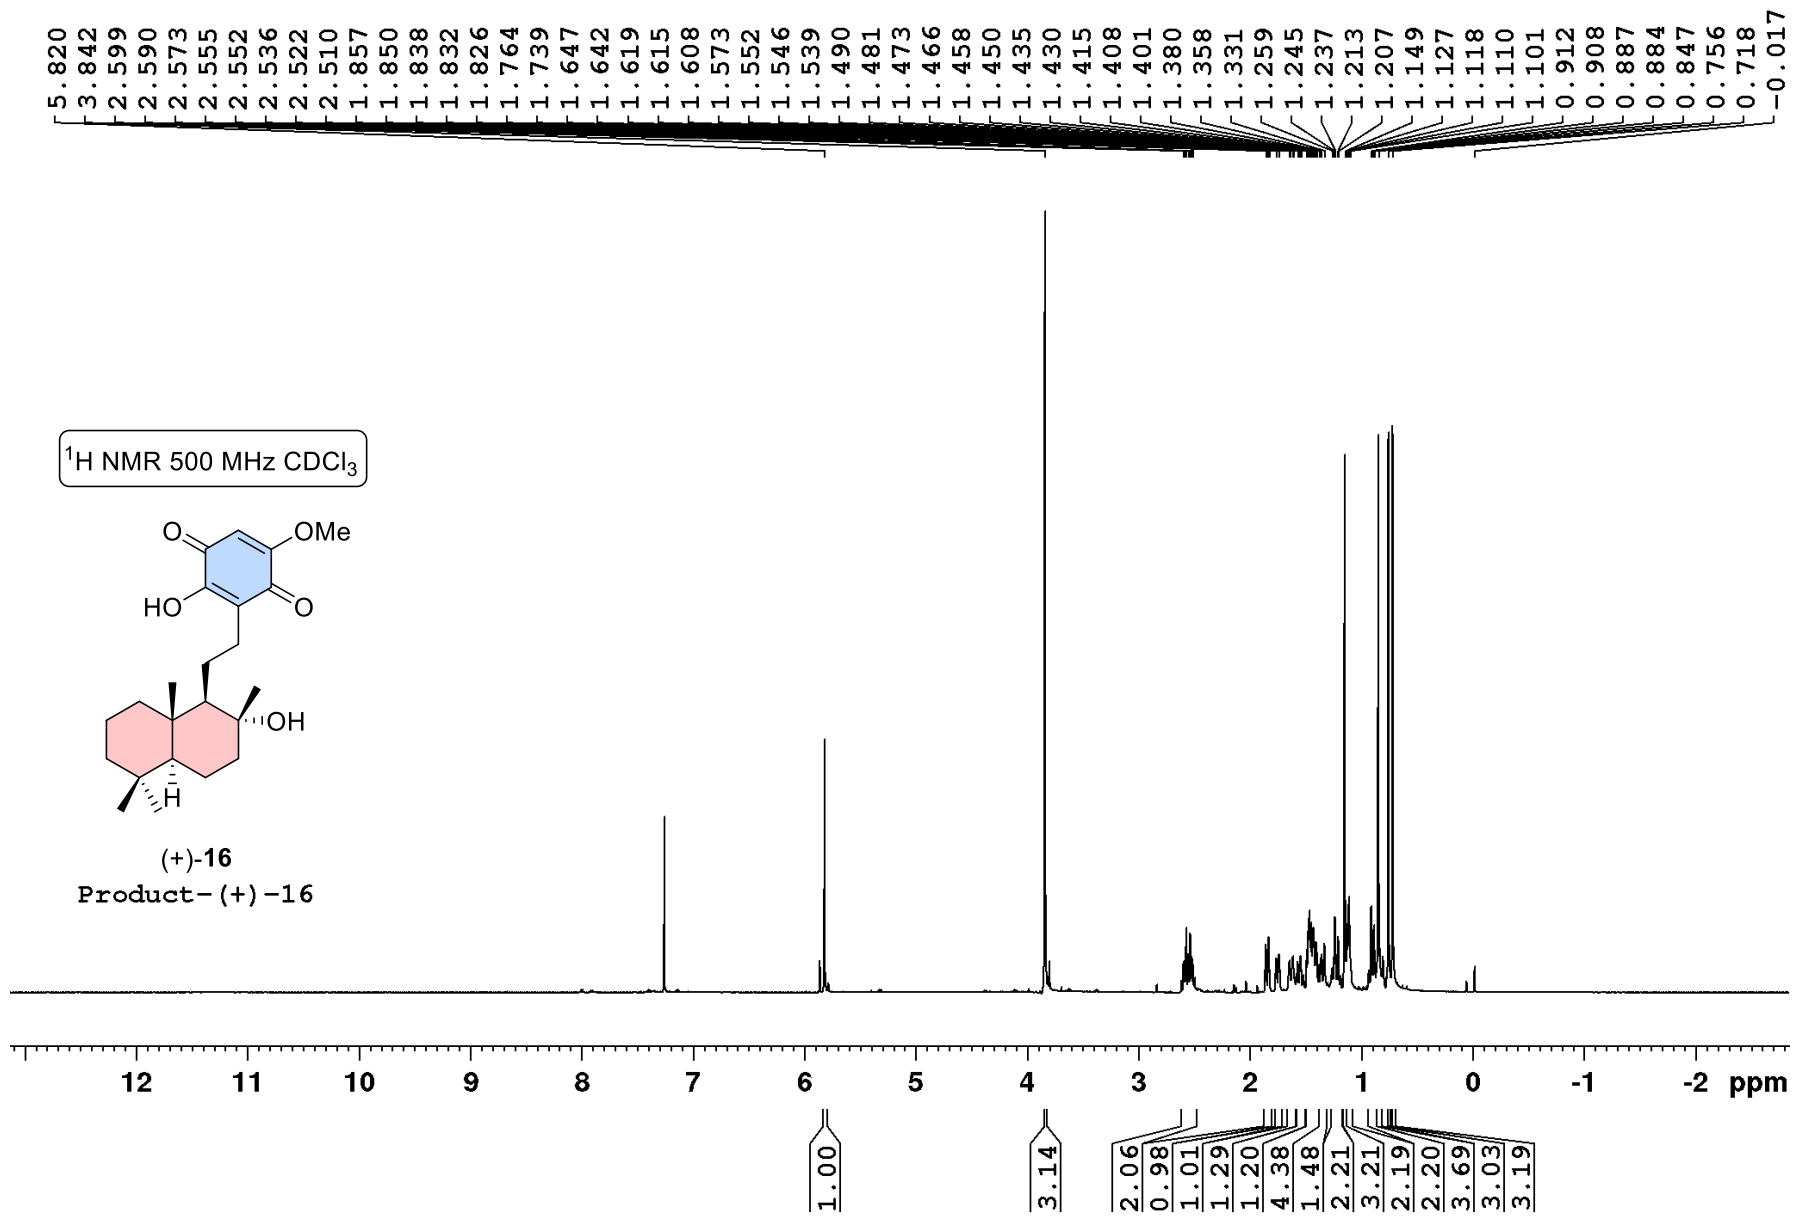

$^{13}\text{C}\{^1\text{H}\}$  NMR 100 MHz  $\text{CDCl}_3$

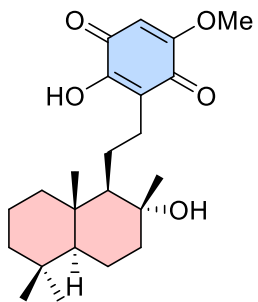

(+)-16

Product- (+) -16

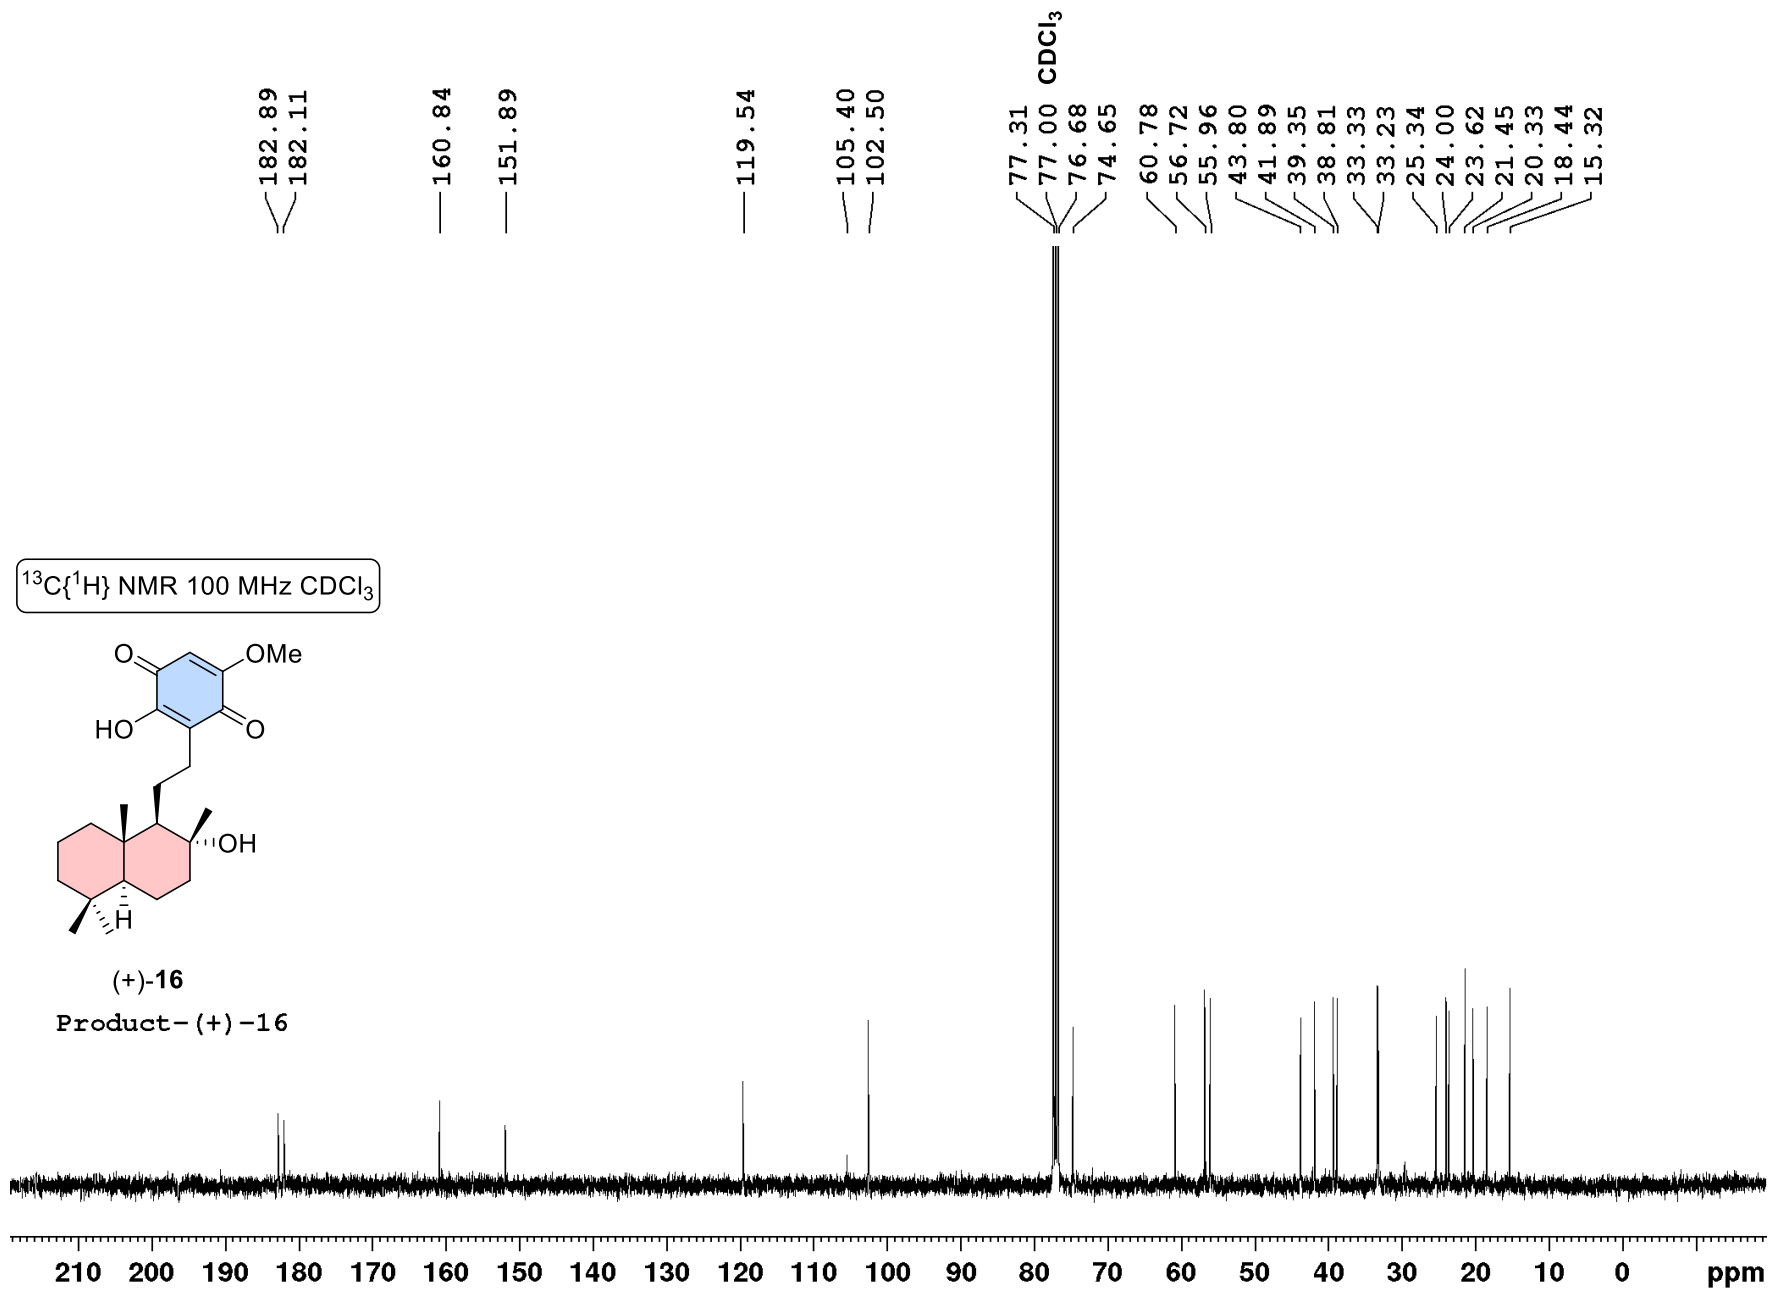

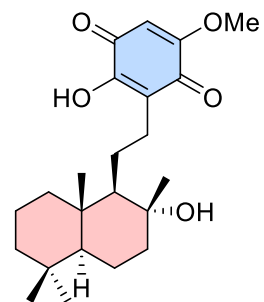

(+)-16  
Product-(+)-16

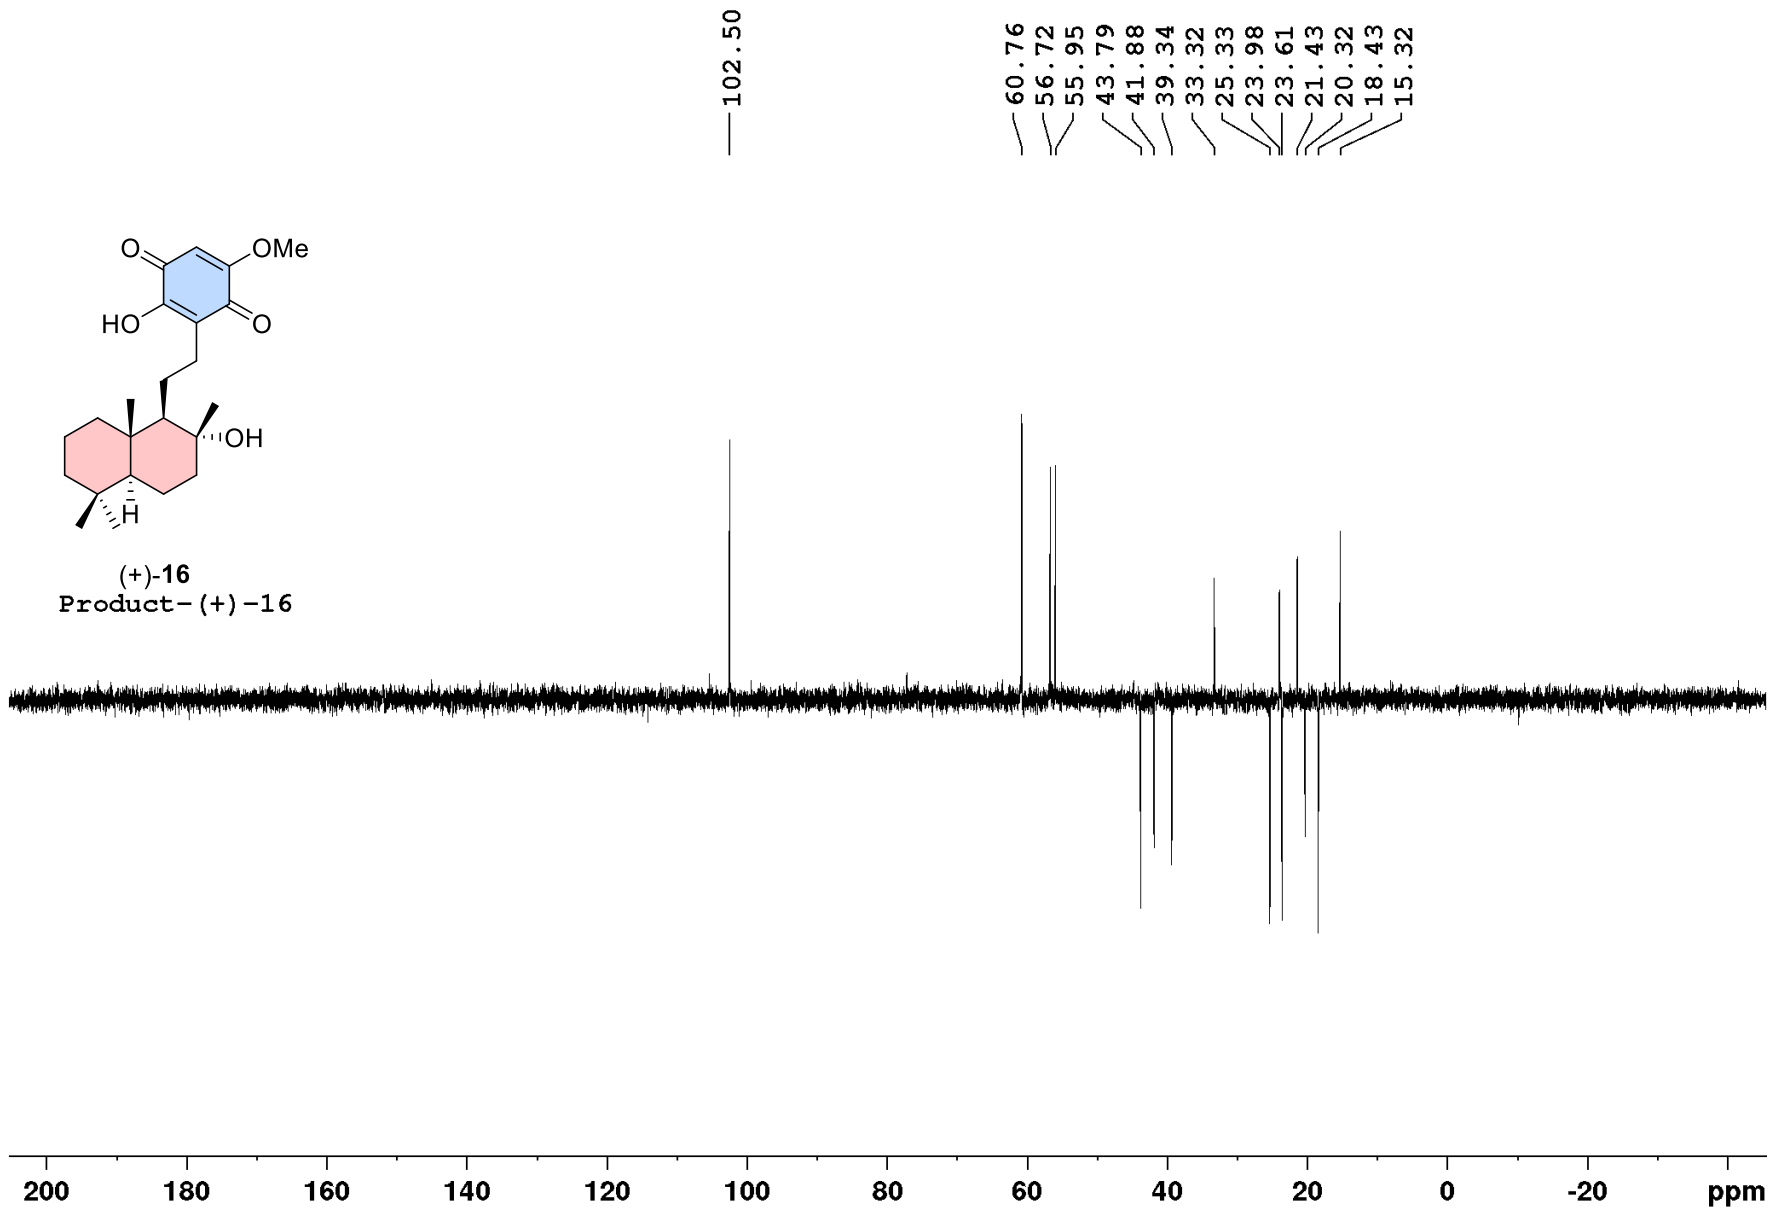



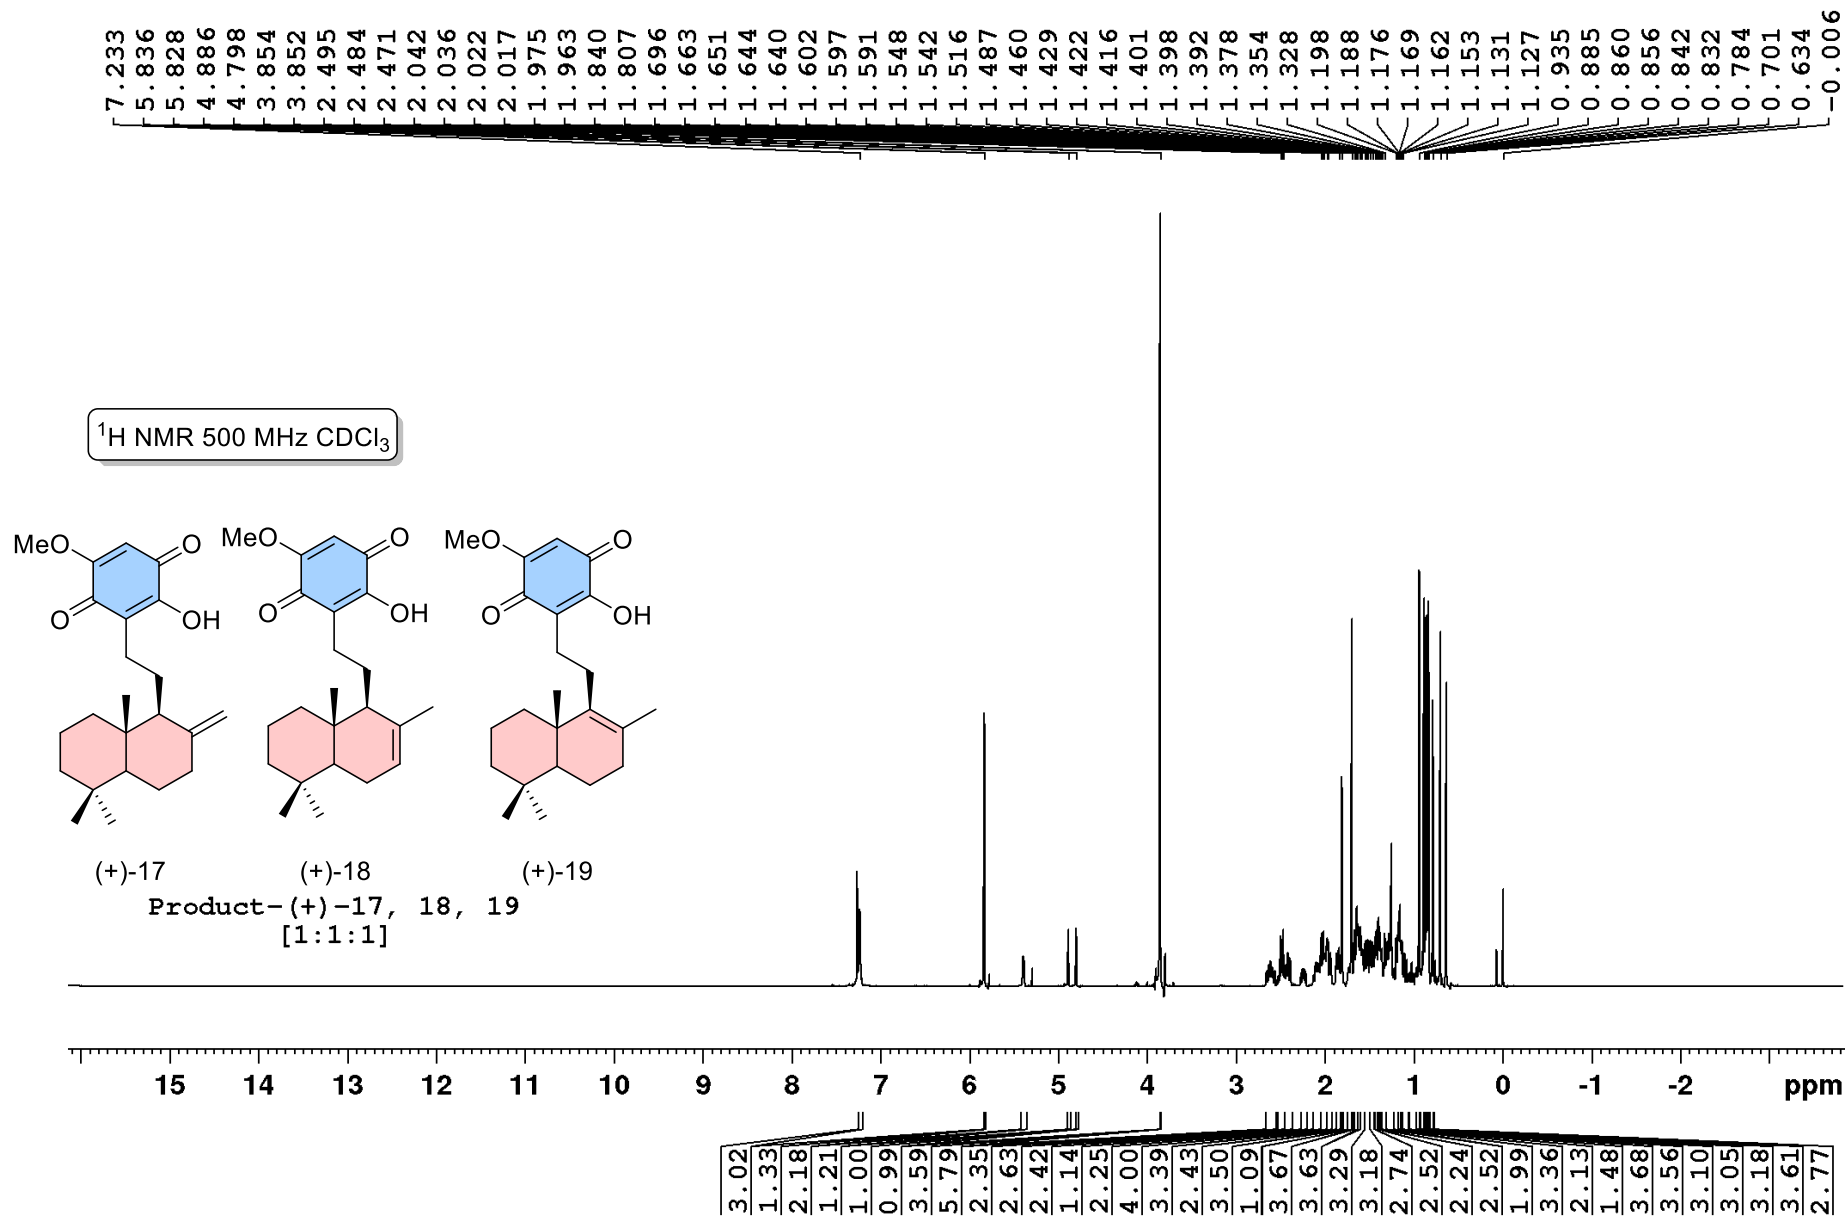

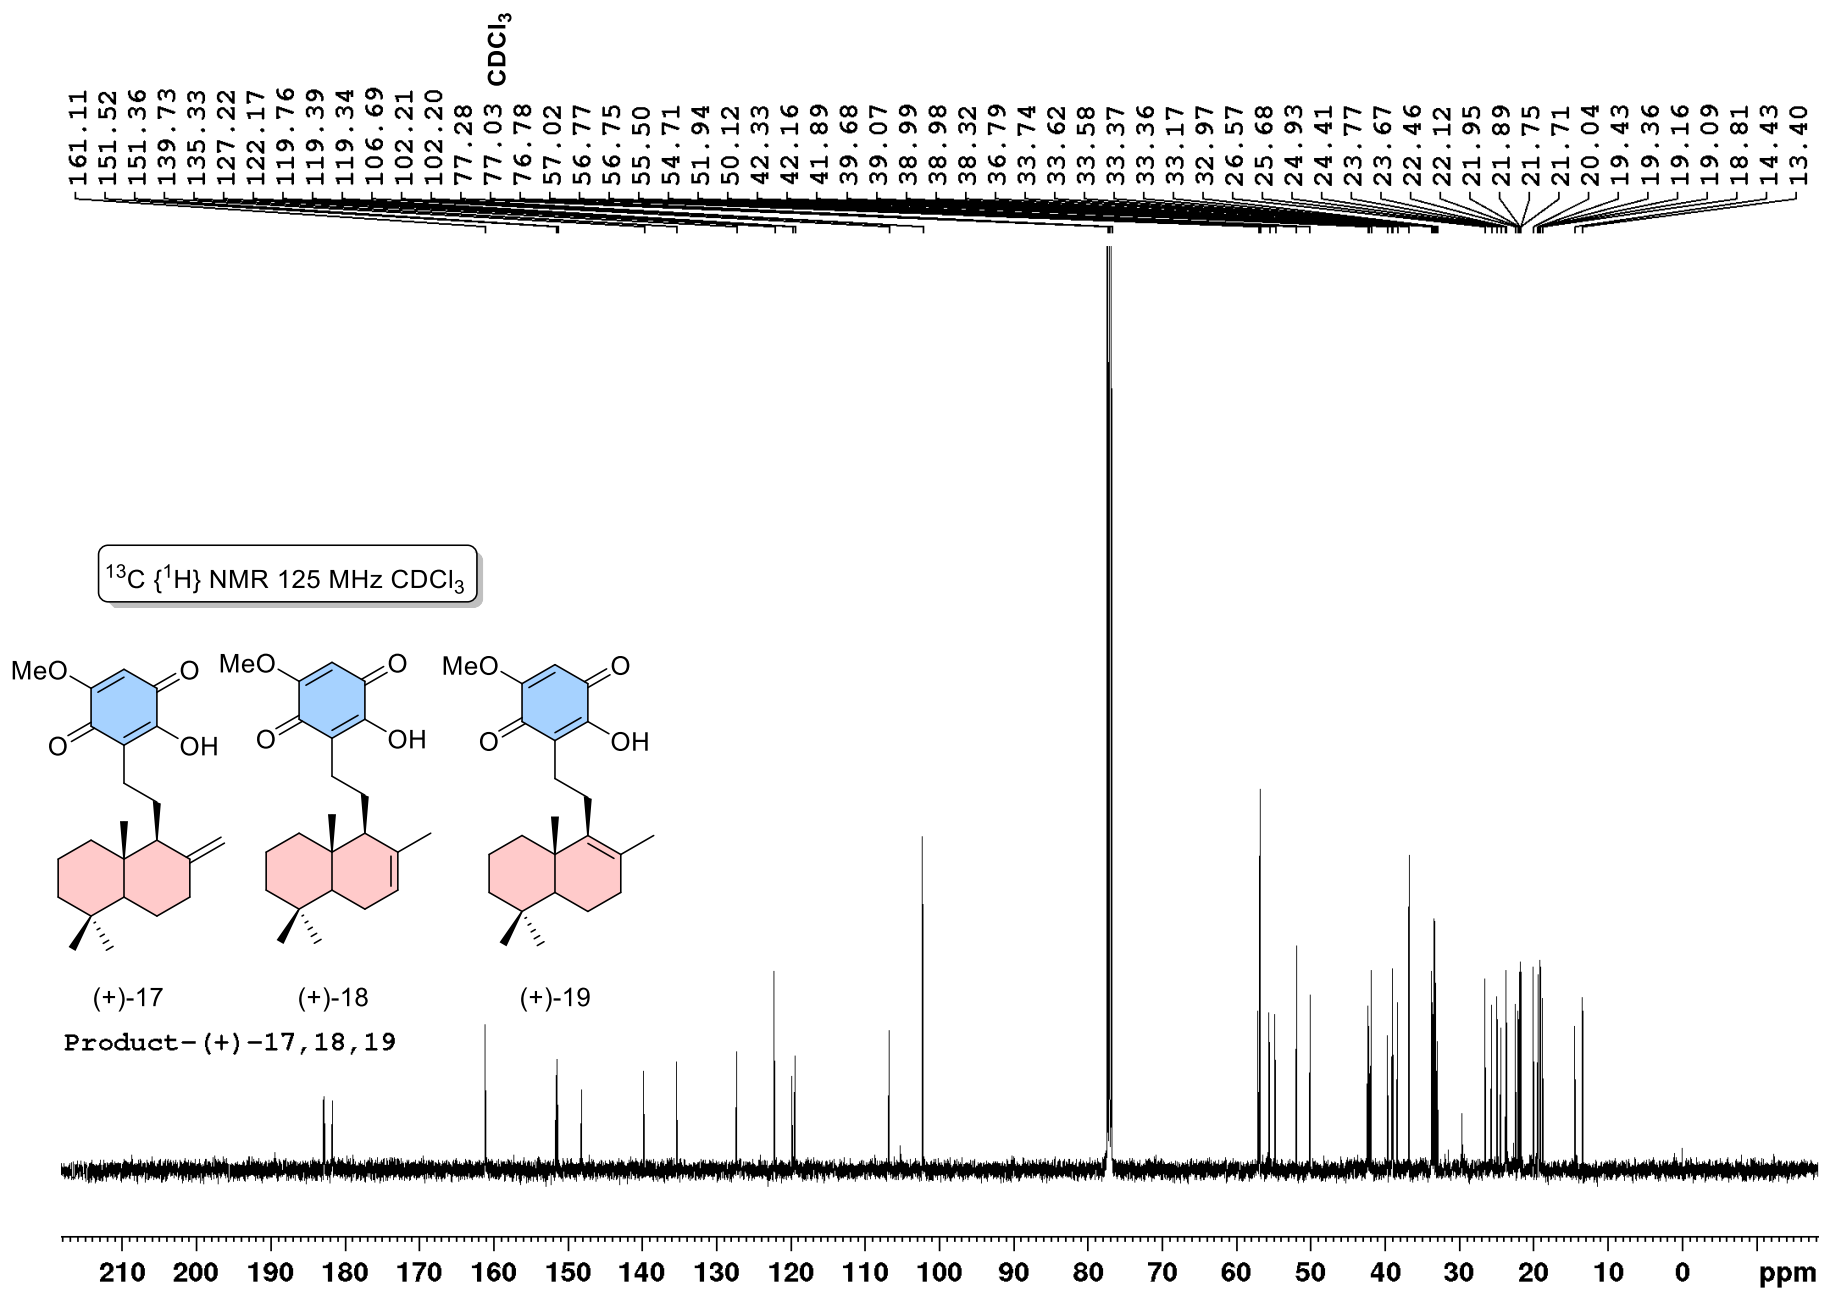

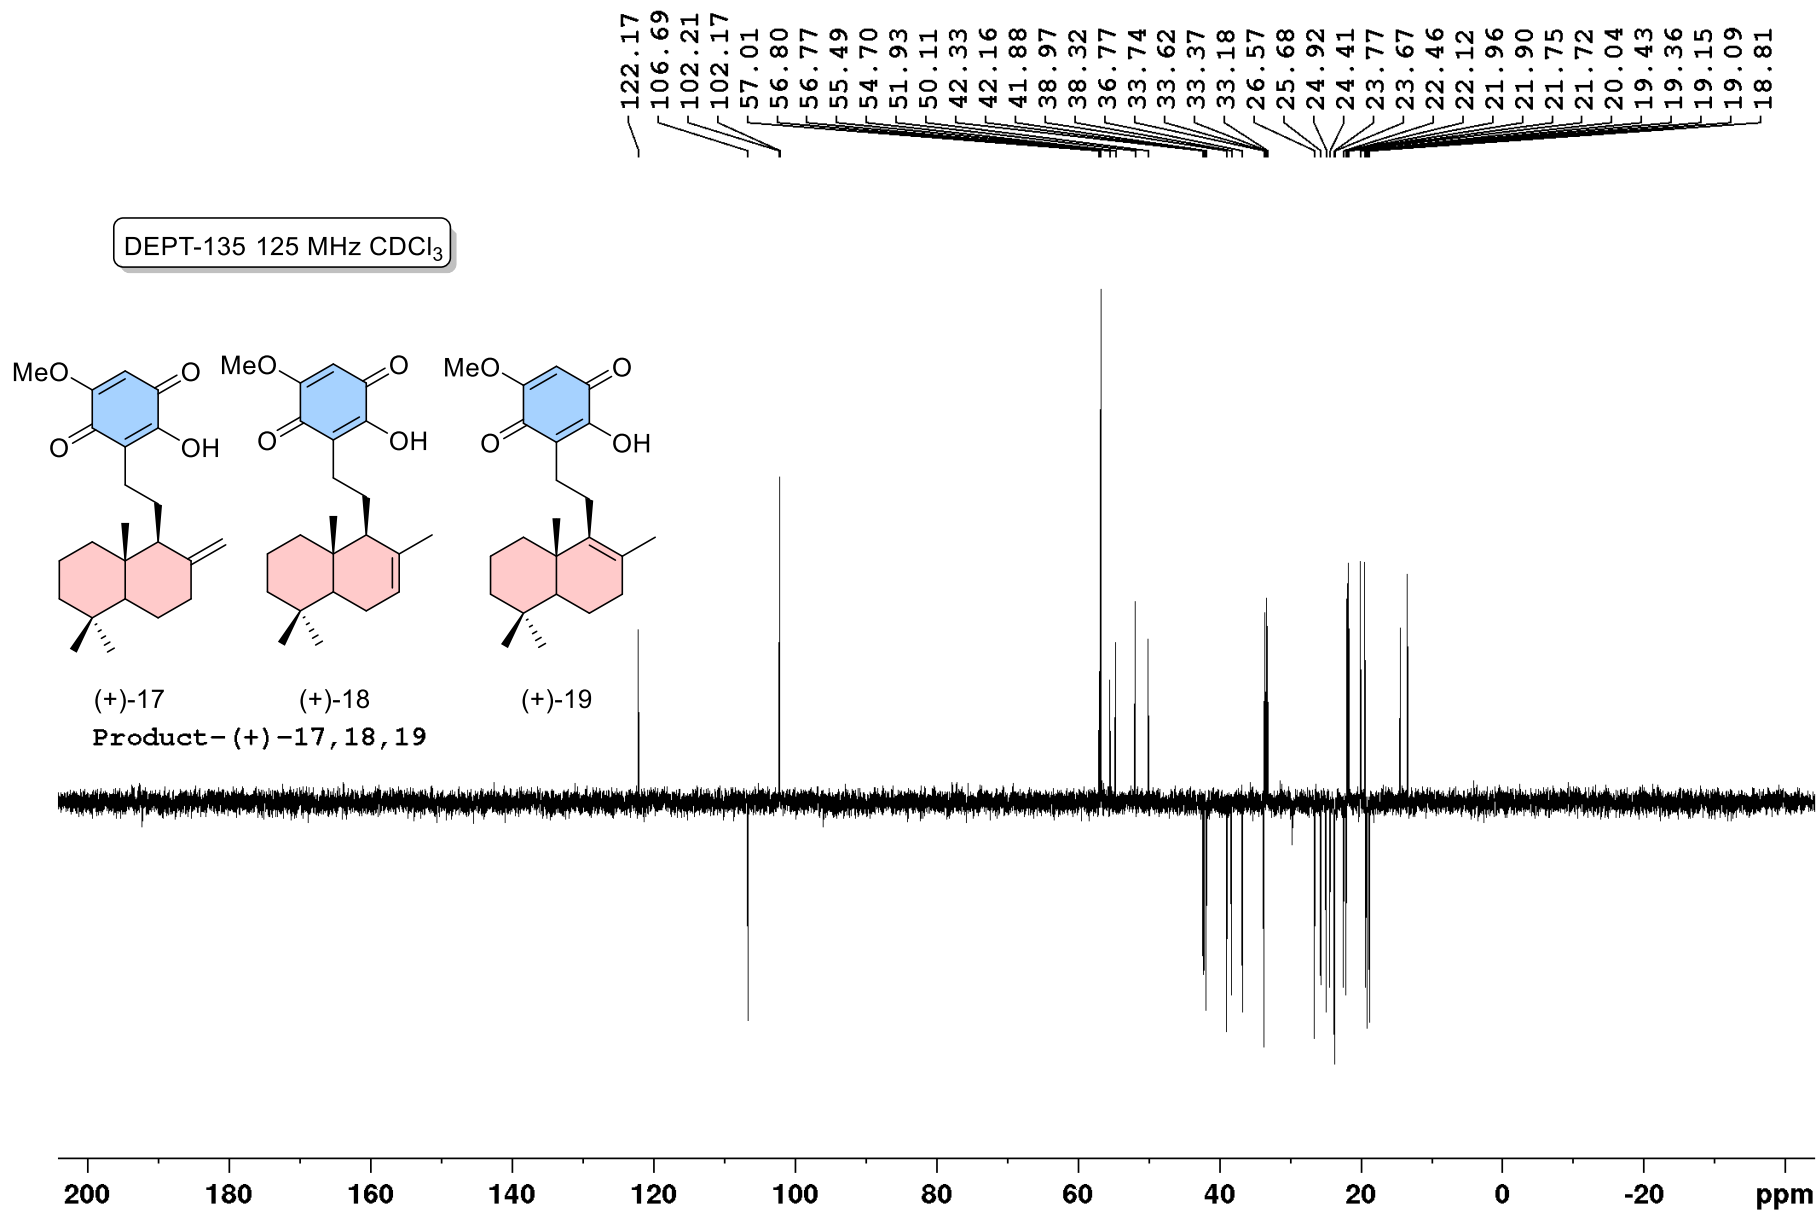

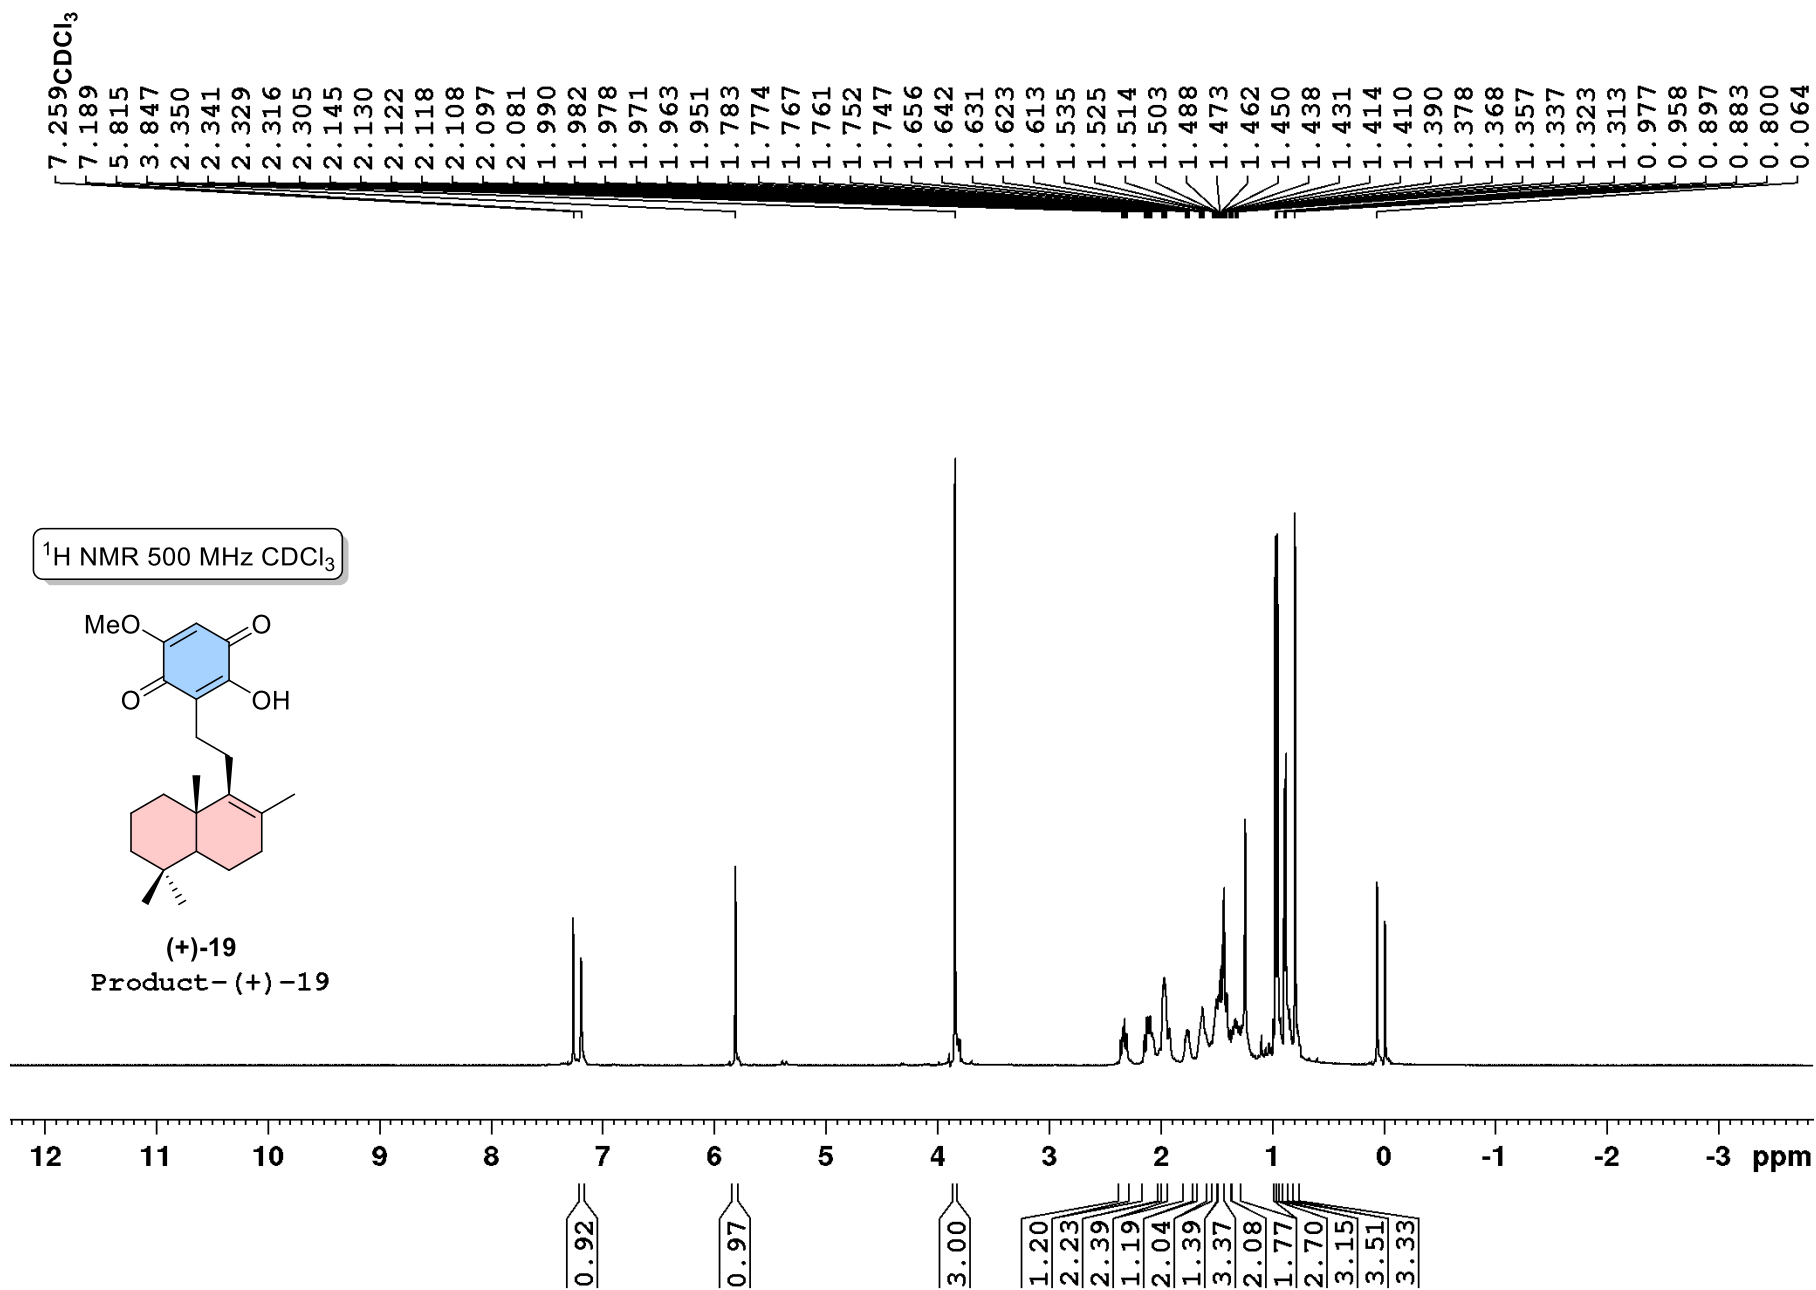

$^{13}\text{C} \{^1\text{H}\}$  NMR 125 MHz  $\text{CDCl}_3$

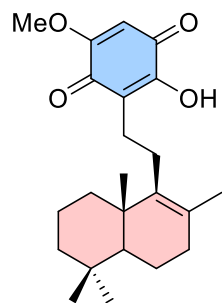

**(+)-19**  
Product- (+)-19

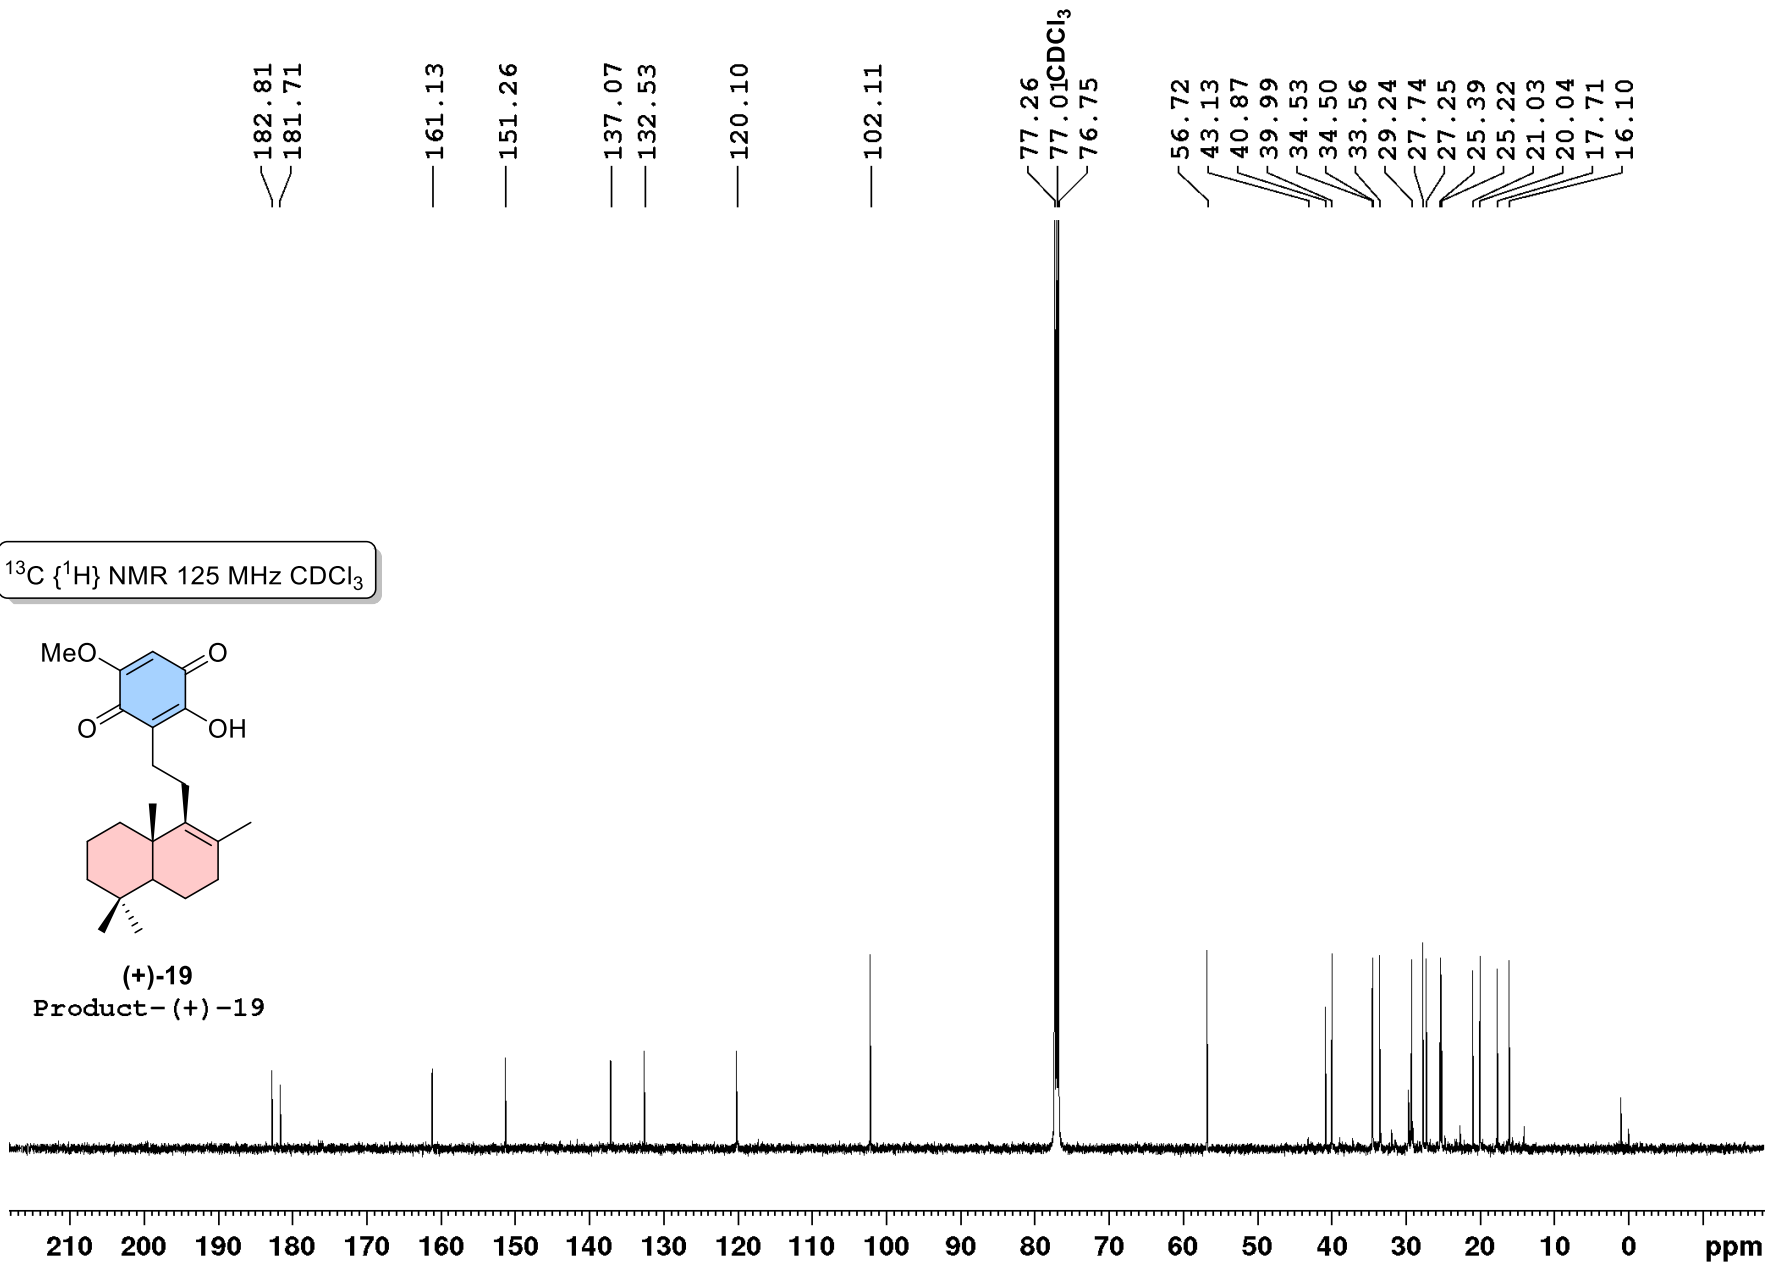

DEPT-135 125 MHz CDCl<sub>3</sub>

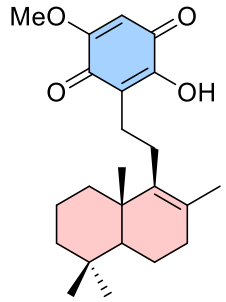

(+)-19  
Product- (+)-19

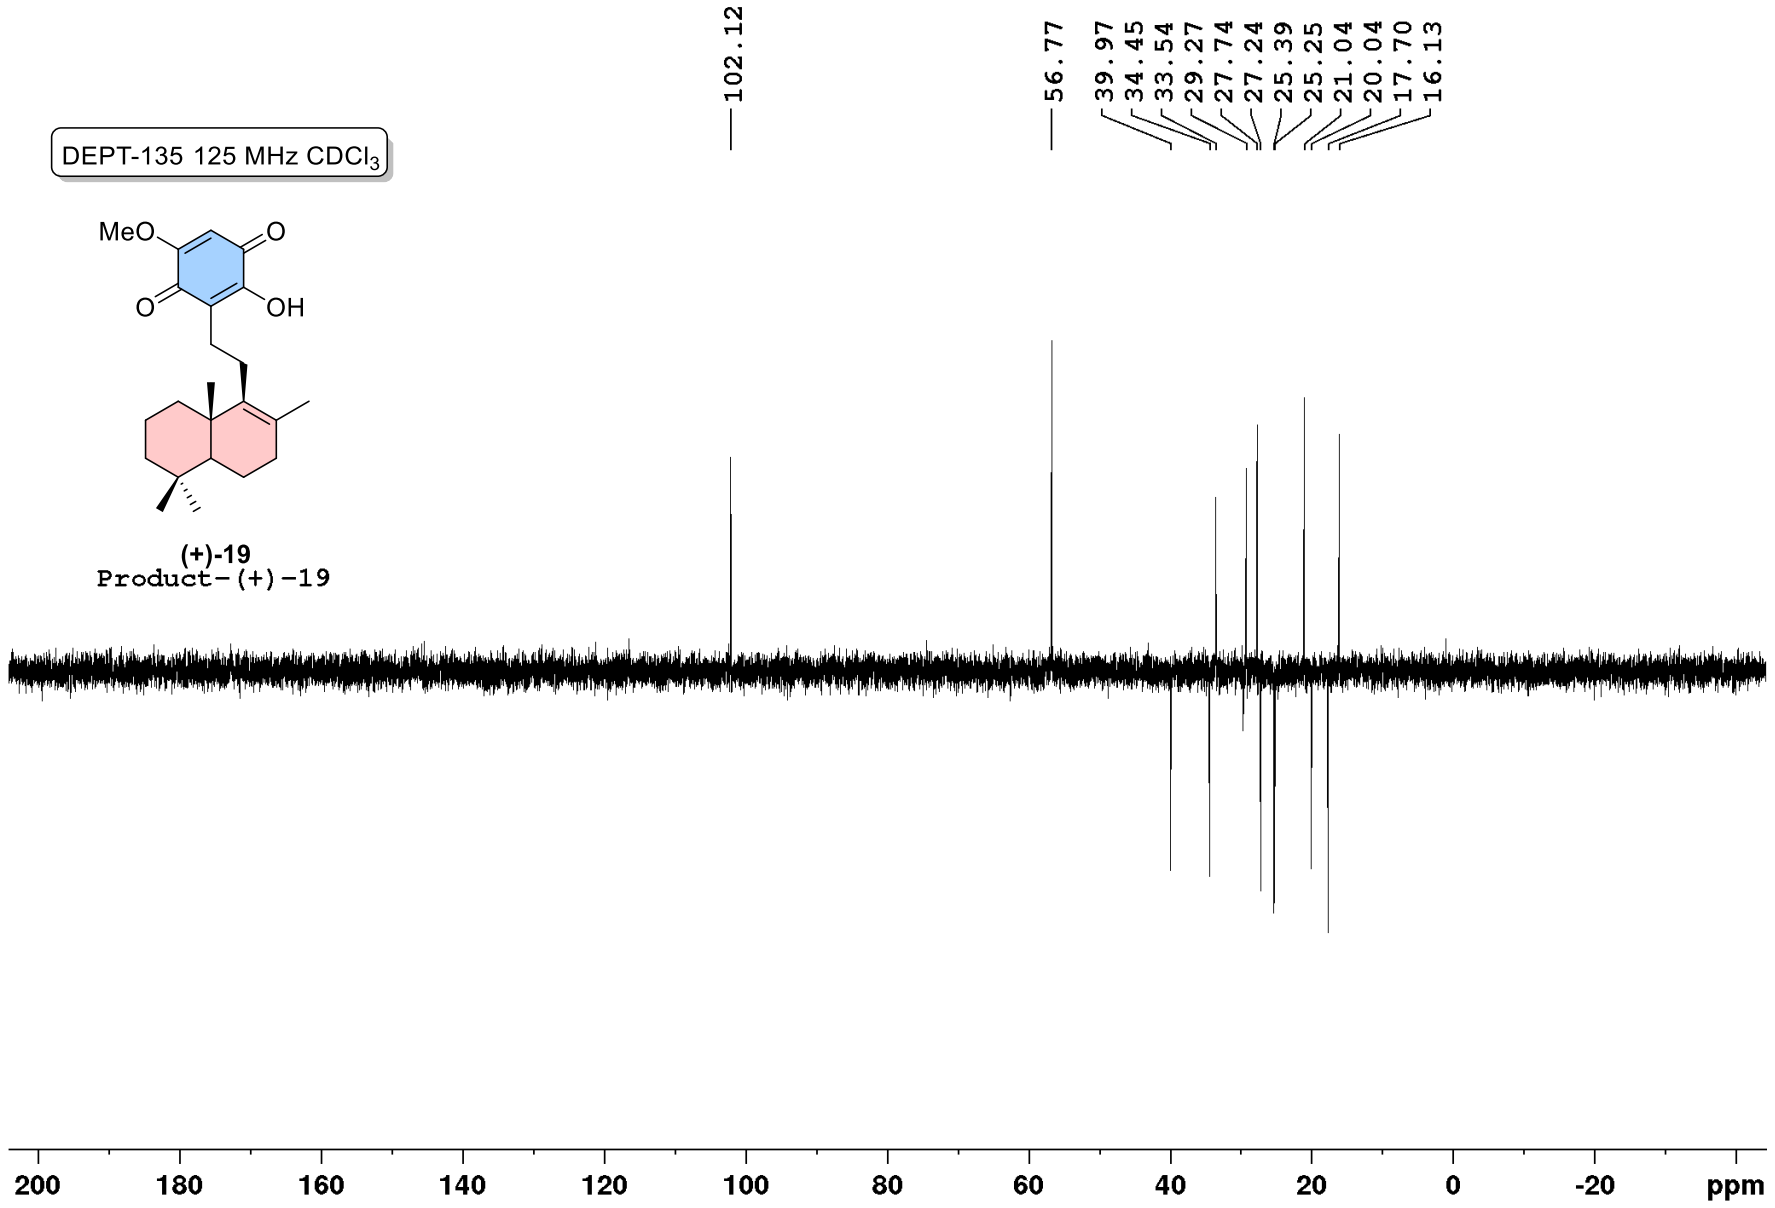

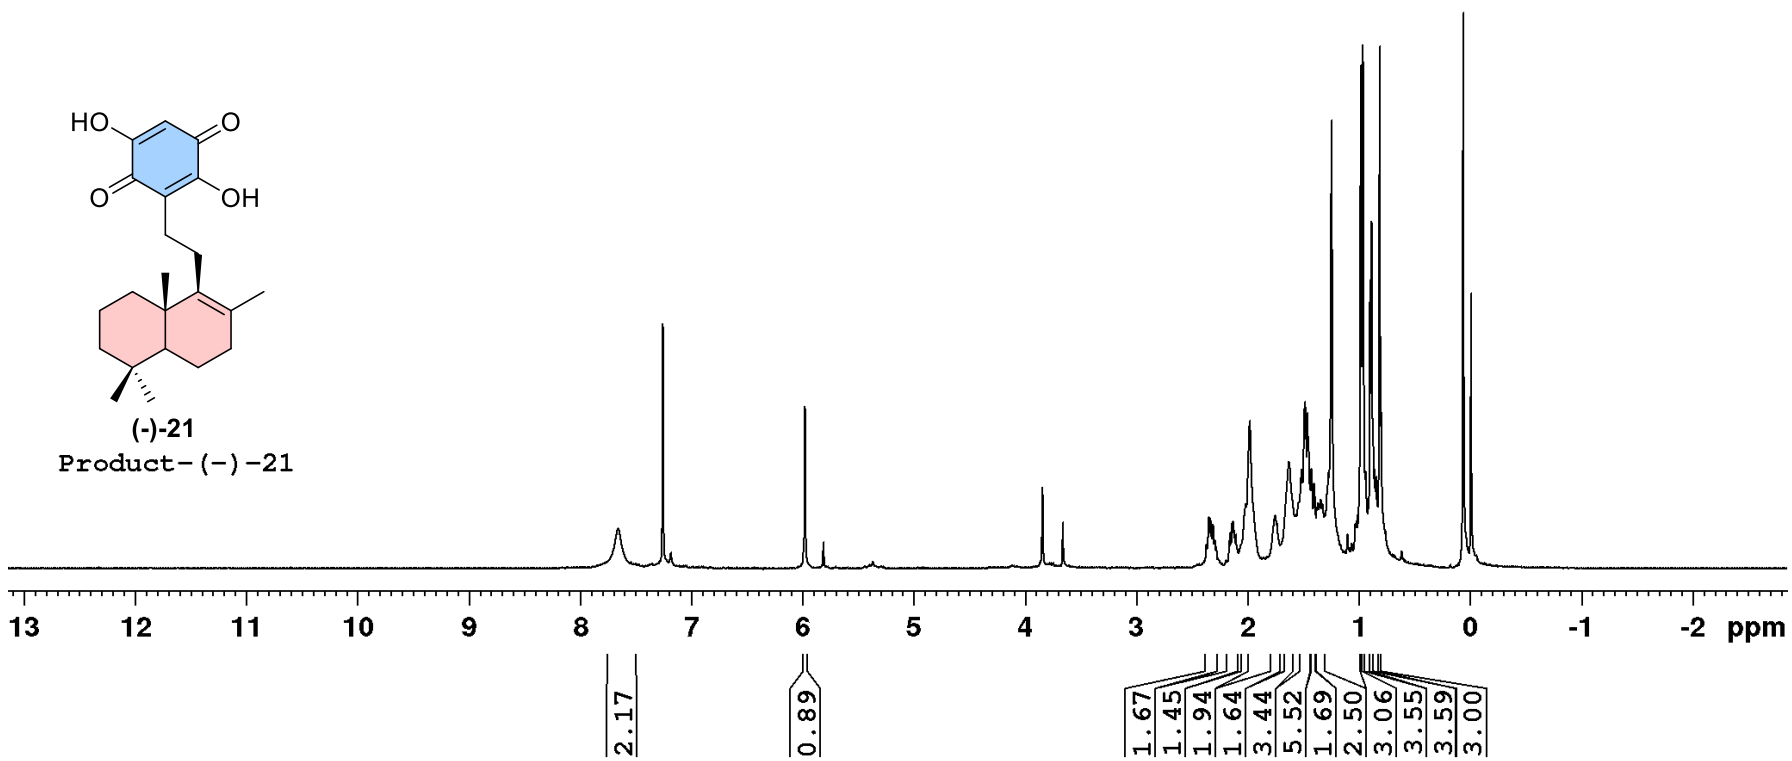

$^{13}\text{C}\{^1\text{H}\}$  NMR 100 MHz  $\text{CDCl}_3$

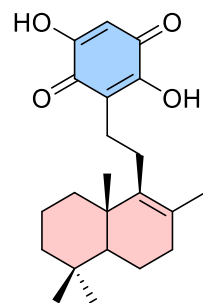

(-)-21  
Product - (-) -21

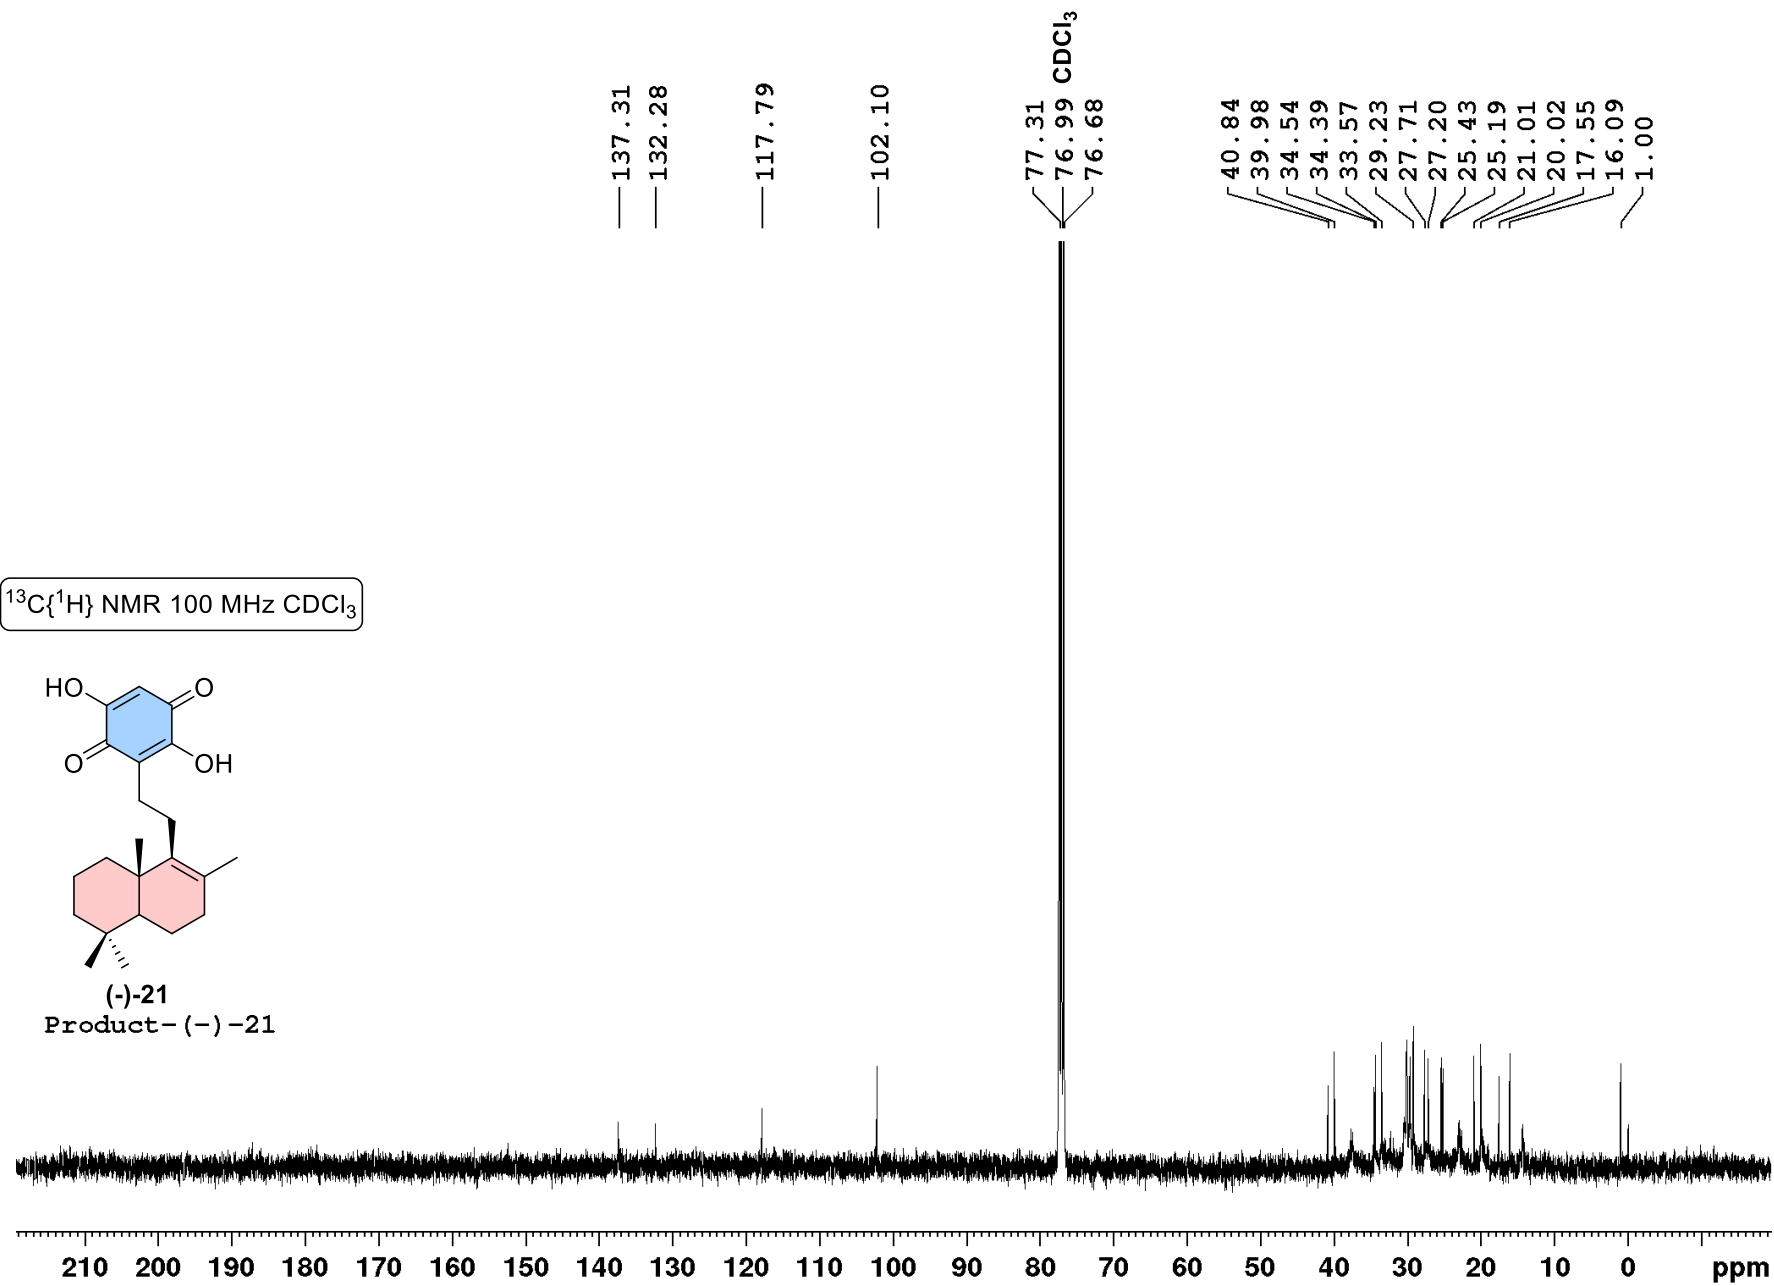



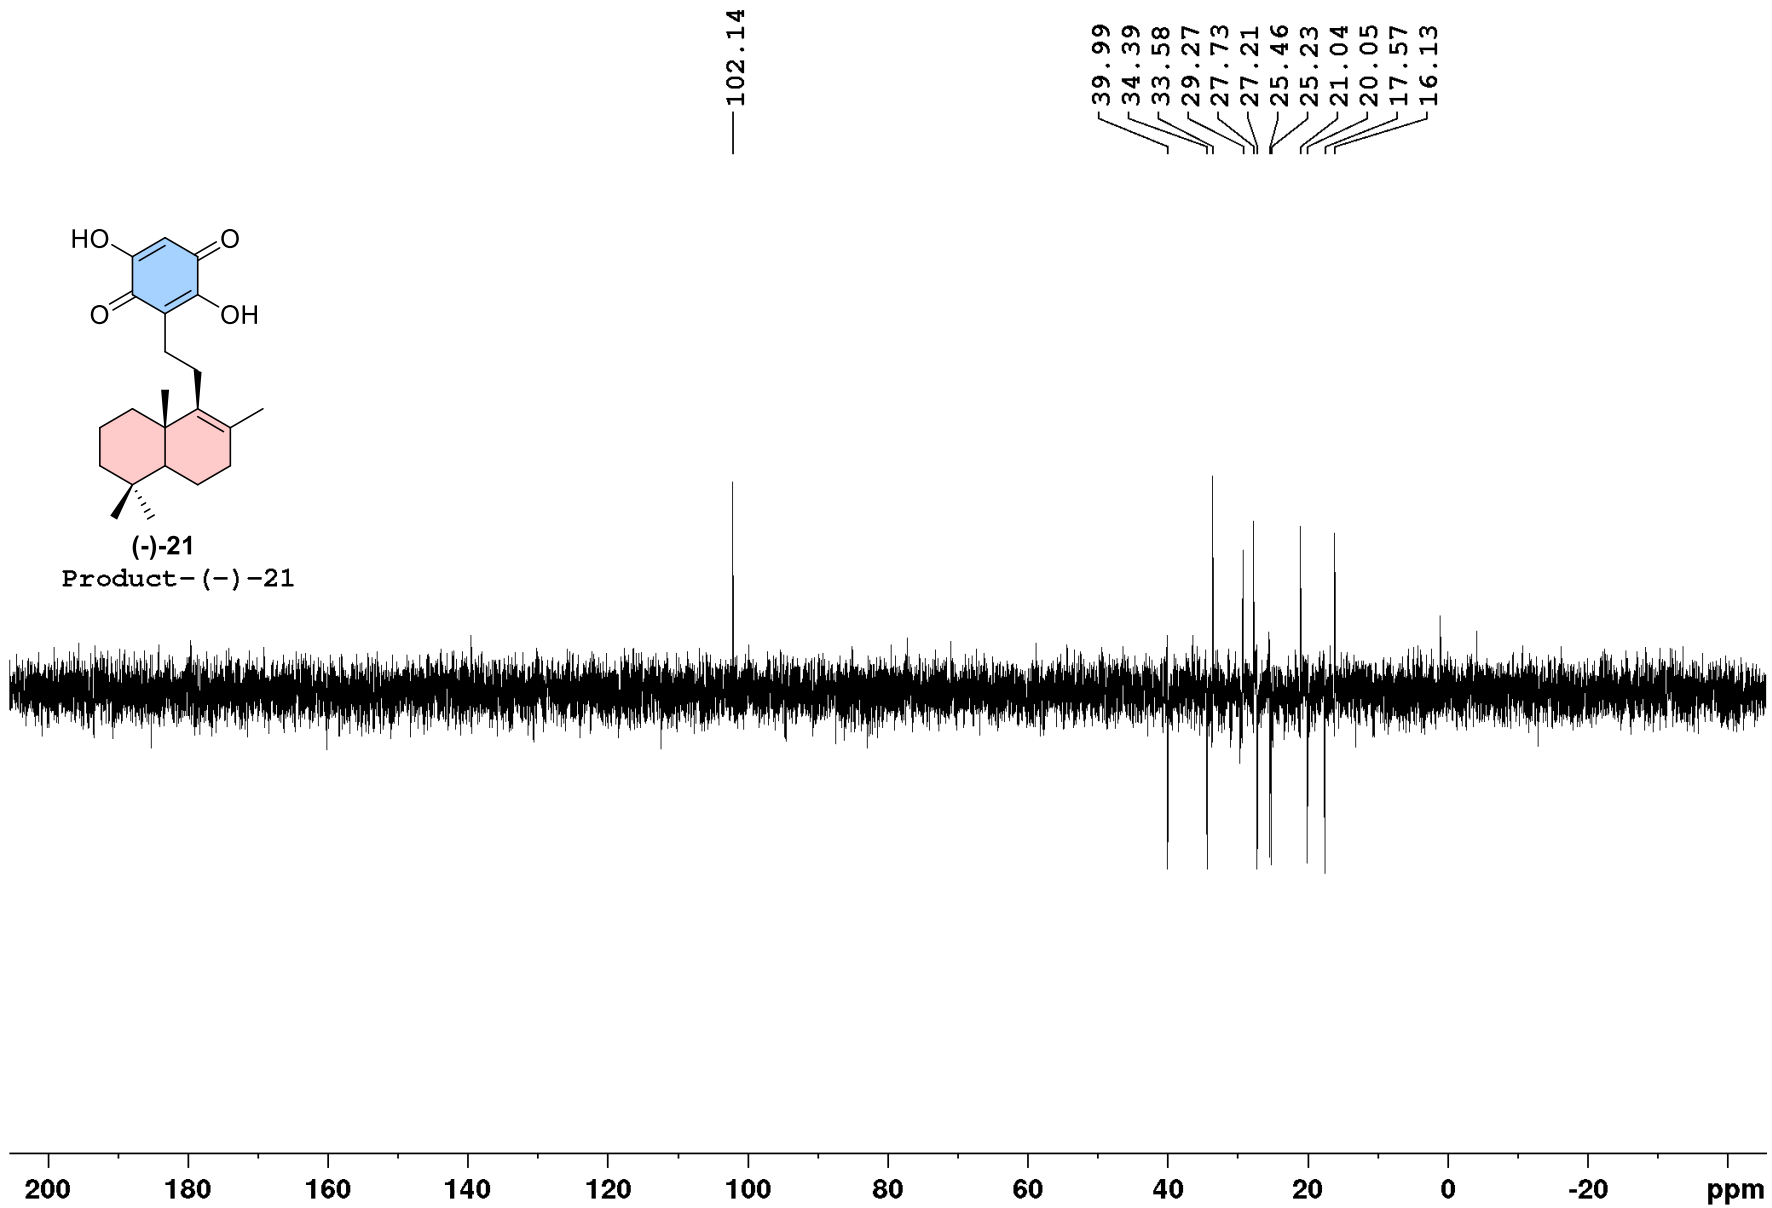

<sup>1</sup>H NMR 500 MHz CDCl<sub>3</sub>

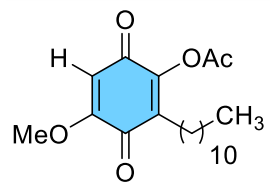

**22f**  
Product-22f

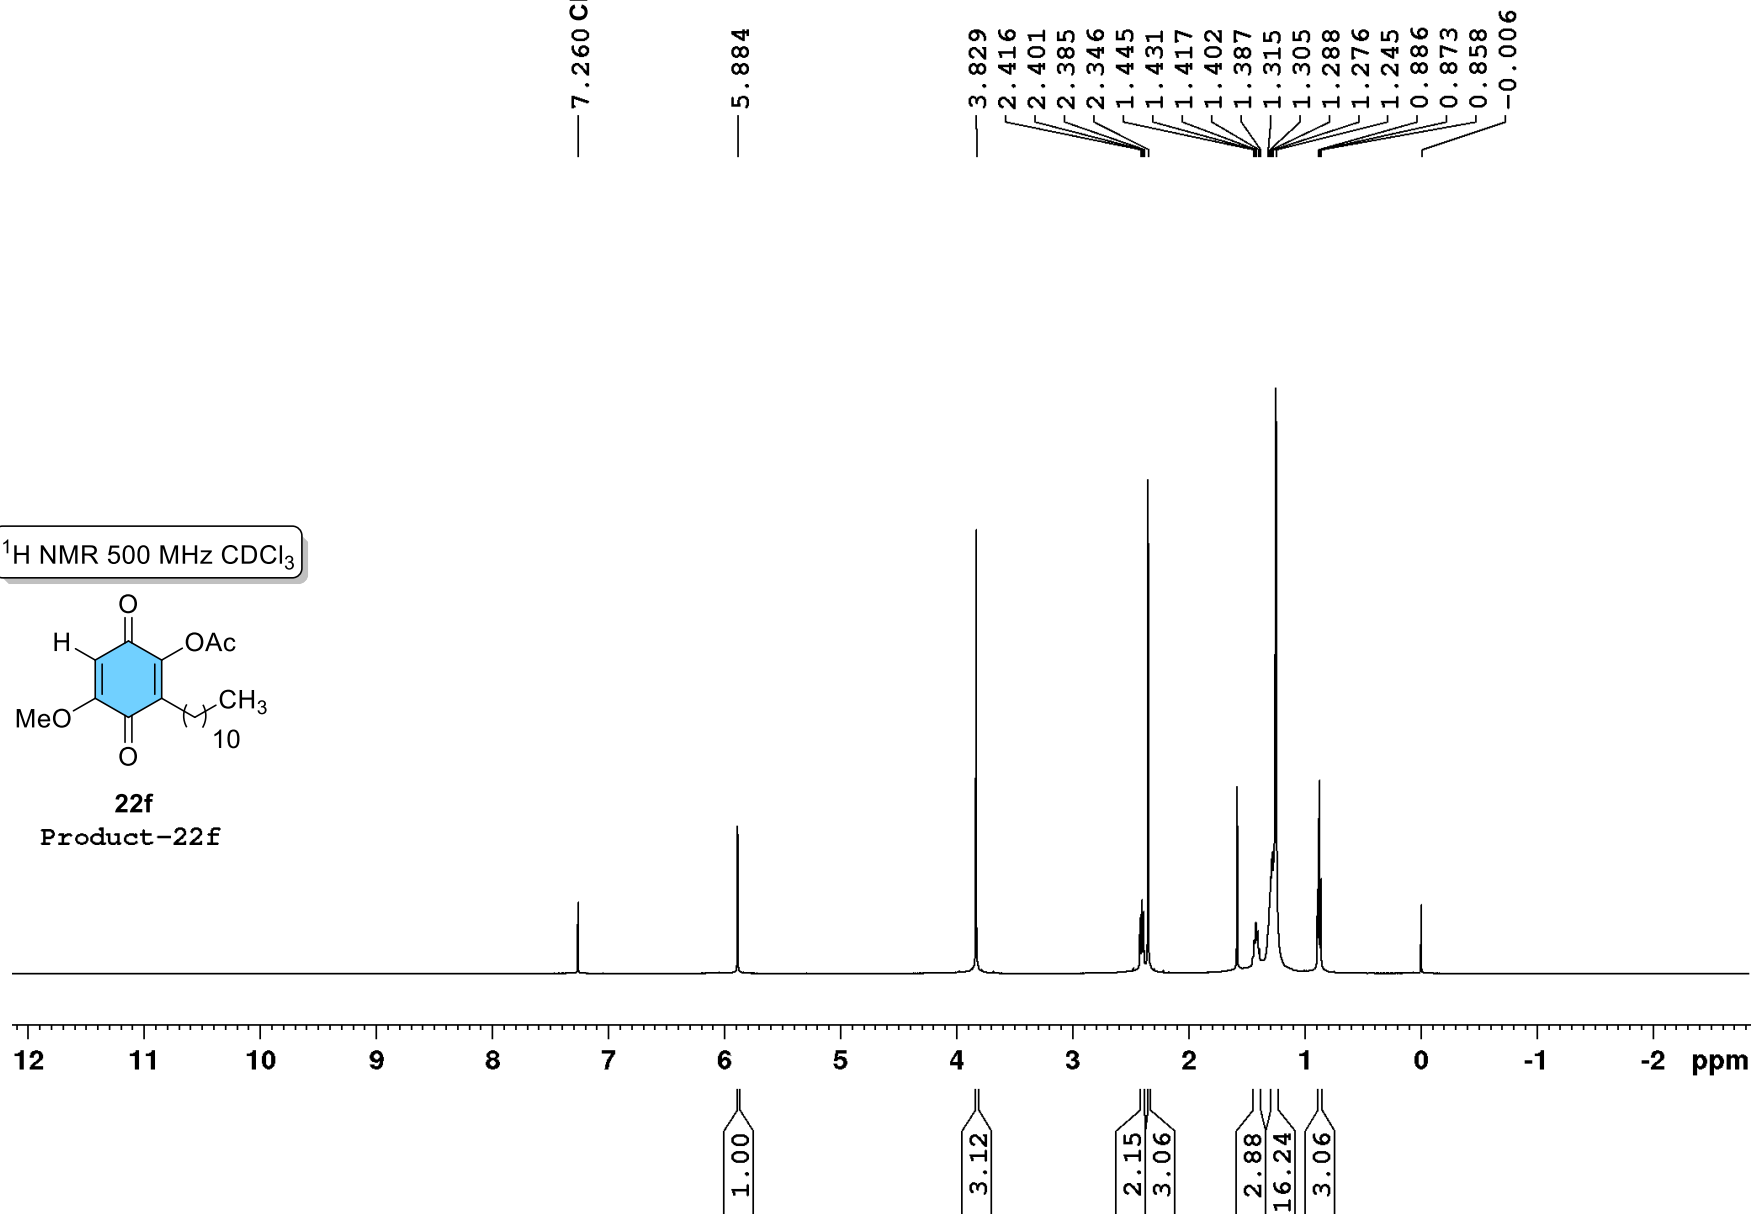

$^{13}\text{C} \{^1\text{H}\}$  NMR 100 MHz  $\text{CDCl}_3$

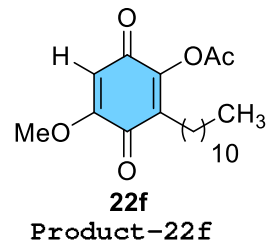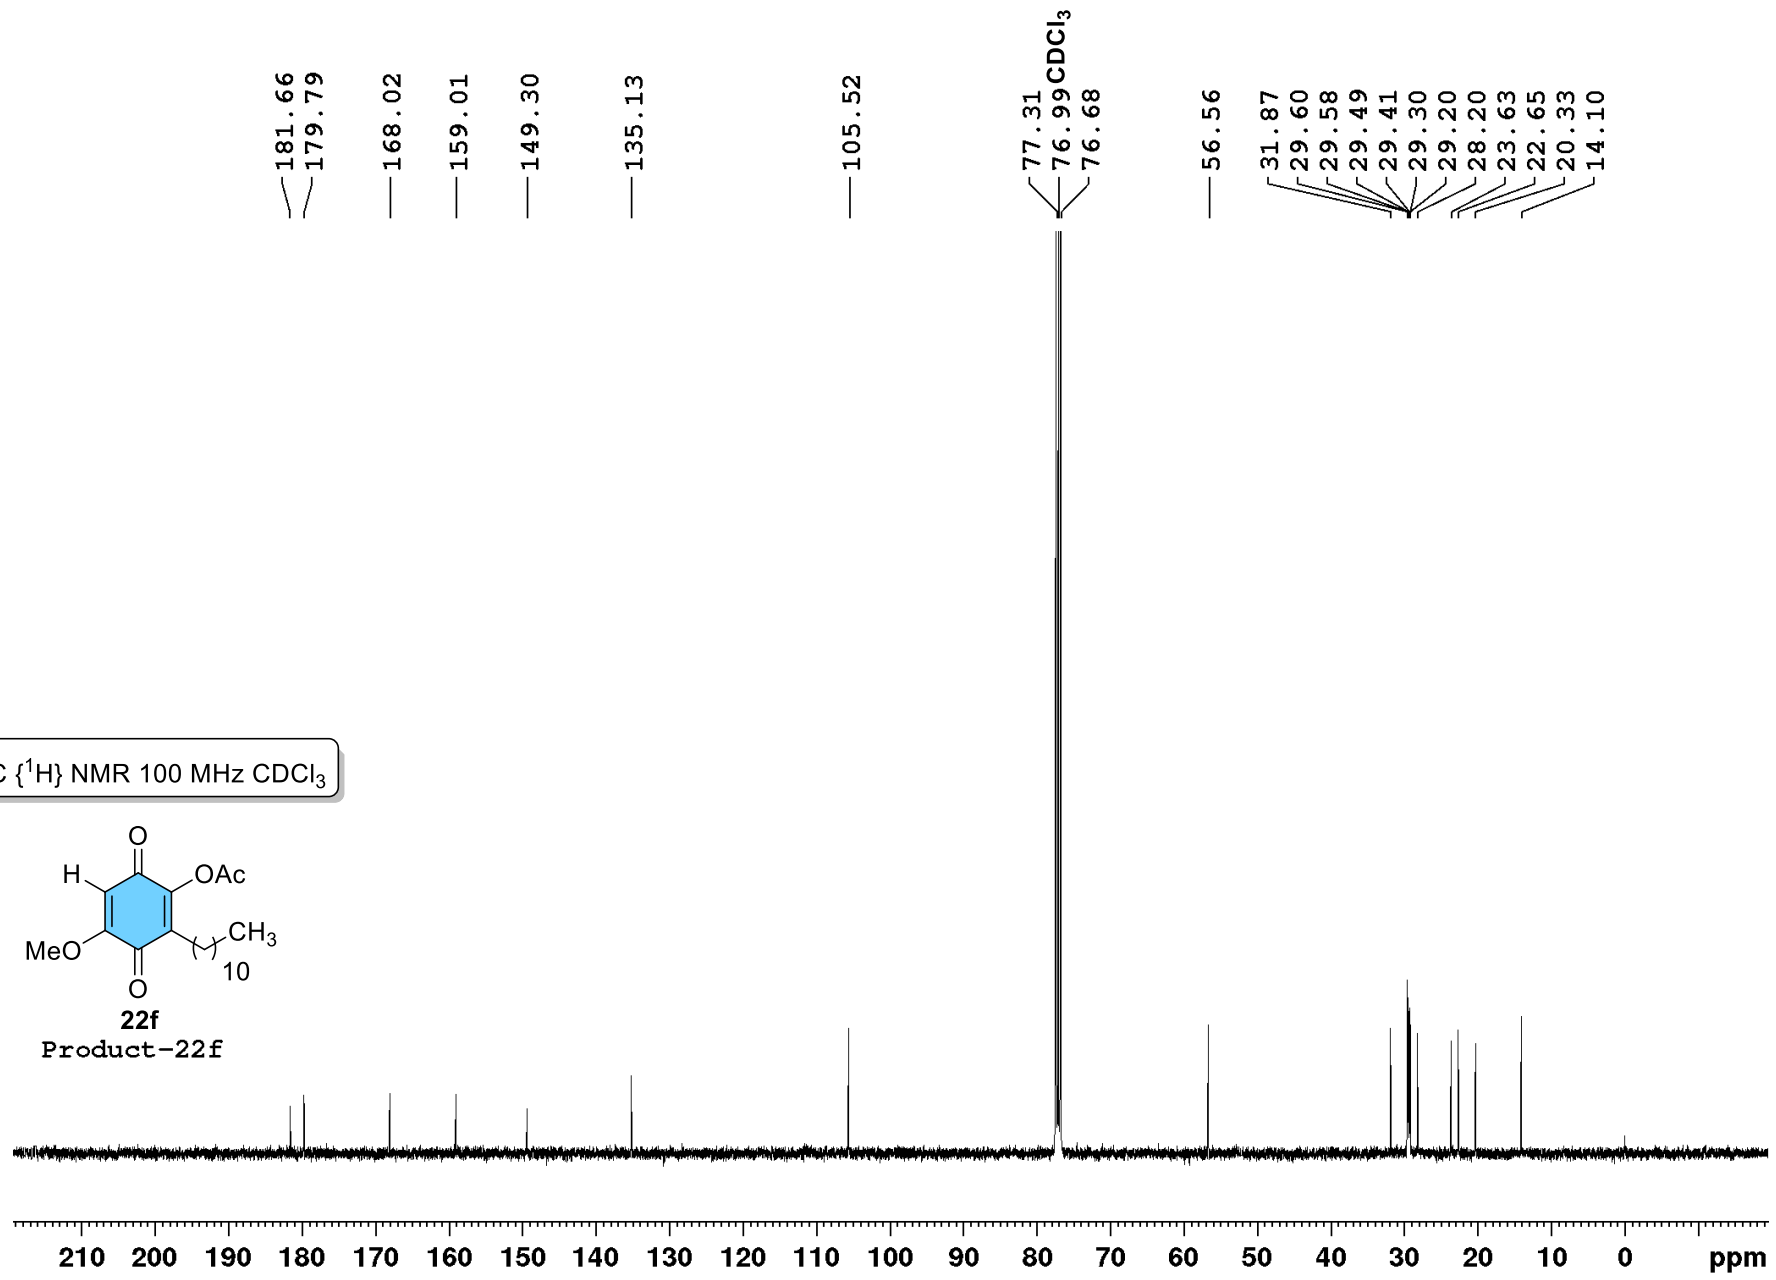

$^{13}\text{C} \{^1\text{H}\}$  NMR 100 MHz  $\text{CDCl}_3$

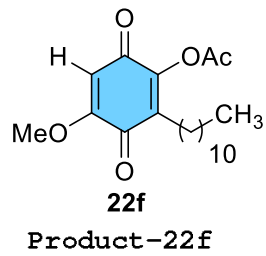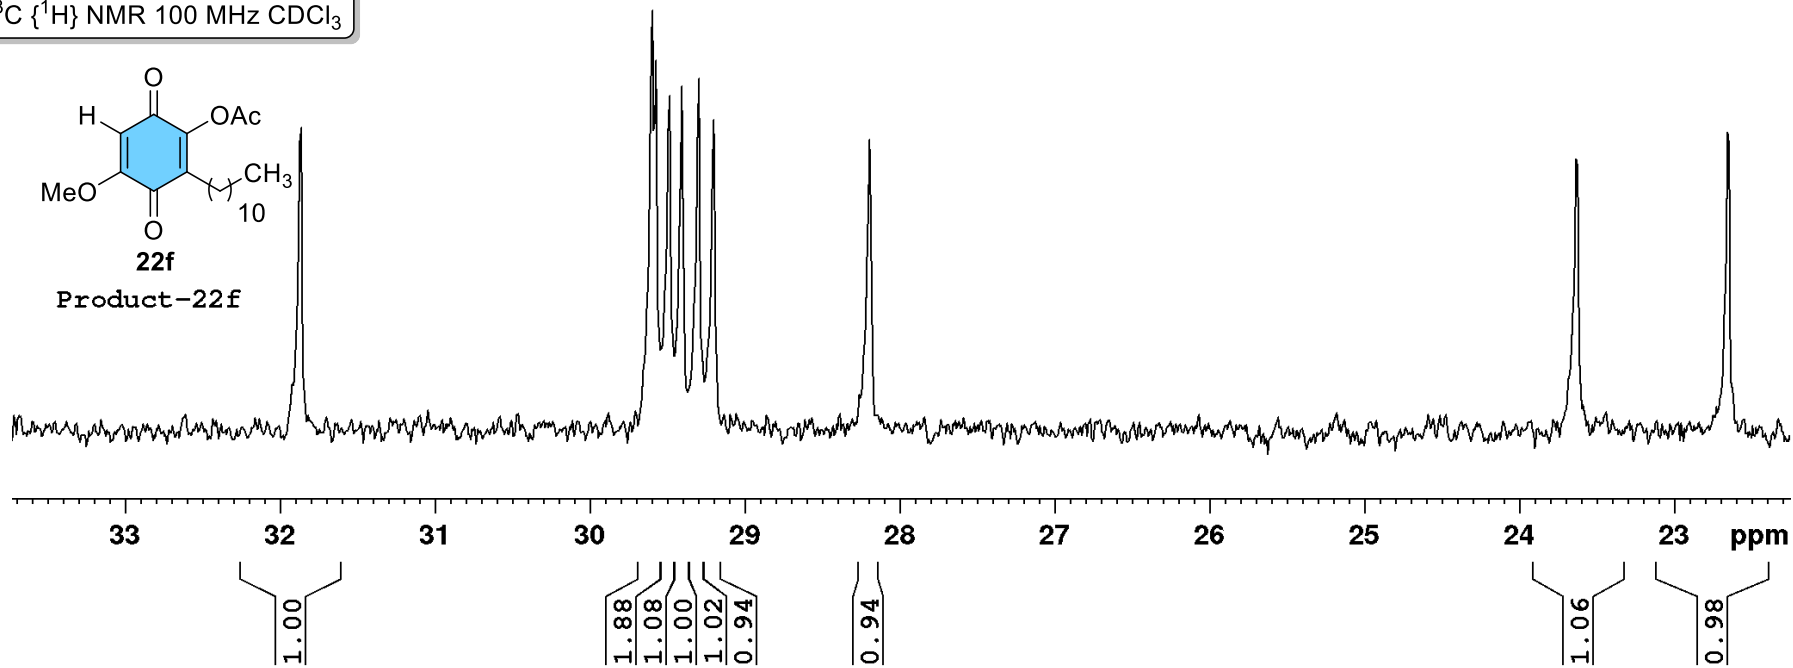

DEPT-135 NMR 100 MHz CDCl<sub>3</sub>

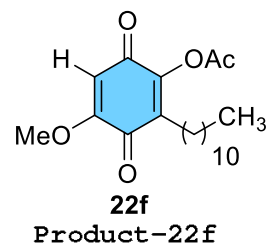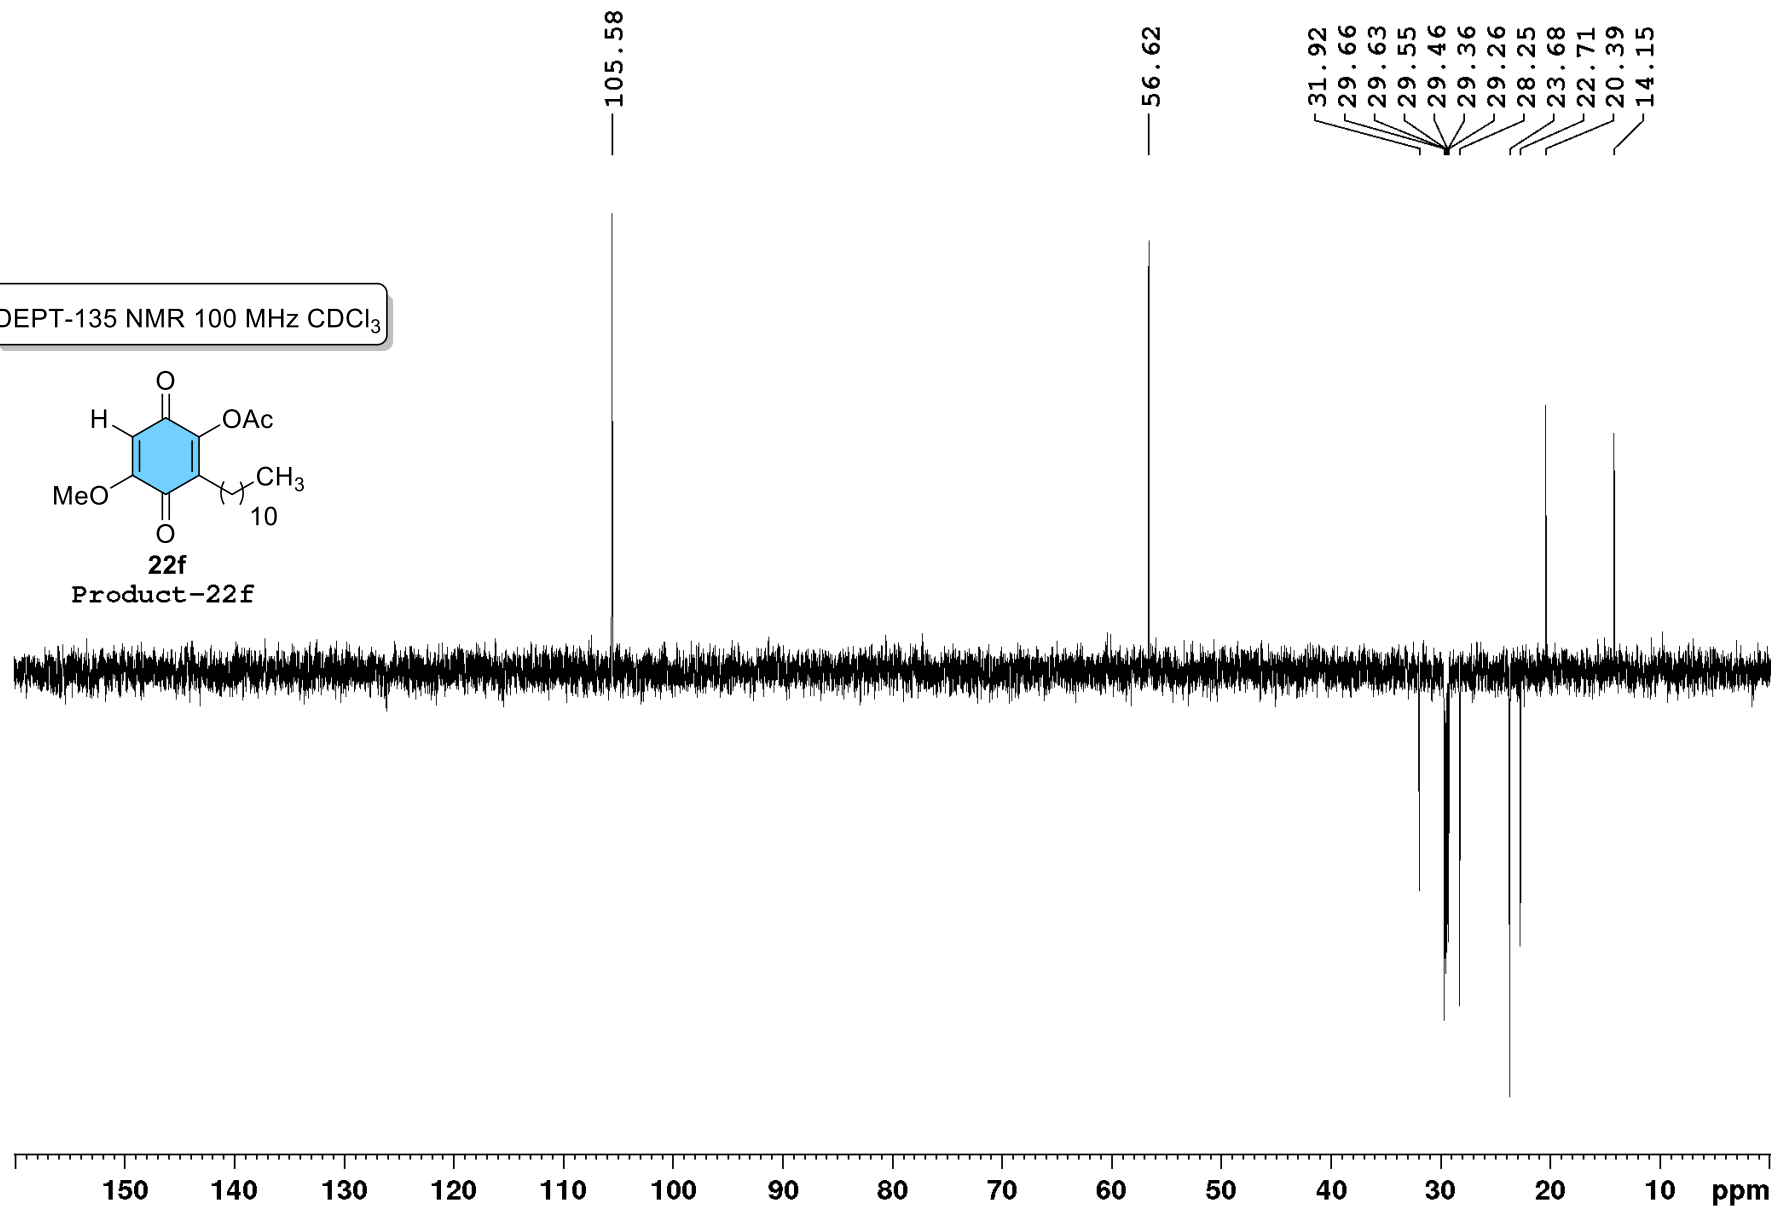

Supplement: d4ob01706d1.pdf [file d4ob01706d1.pdf]
